# Supplementary material for: Proteinortho6: pseudo-reciprocal best alignment heuristic for graph-based detection of (co-)orthologs
Source: Front Bioinform. 2023 Dec 13;3:1322477. doi: 10.3389/fbinf.2023.1322477 (PMC10751348; doi:10.3389/fbinf.2023.1322477)
Supplement: Supplementary file 2 [file Table1.XLSX]

## Sheet: datasets overview
fasta files
Name	proteins	species				note
QfO2020_04	984k	78
Bac	32,363k	8623				the full set of all bacterial species of uniprot_2022_03
Bac_10	27k	10				randomly sampled subset of uniprot_Bac (full list in table shuffled uniprot_x)
Bac_20	70k	20
...
Bac_1000	3777k	1000
blast-graphs	the reciprocal best hit graph
				number of connected components
Name	proteins	species	edges	CC		note
BigCC	6142k	1800	1,360,361k	100k
BigCC100	5344k	1800	1,359,620k	8581		the subset of all connected components of Bac that have at least 100 proteins.
simulated	-	-	-	-		see table with simulated data

## Sheet: scalability uniprot_n
bac_x subset, number of fasta files	algo	mean runtime	sd runtime	mean rss	sd rss	number of replicates			tool	version	comment
10	default_orthofinder	28.82	0	0.11688266666666666	1.6165807537309664e-5	3			proteinortho_core = 'proteinortho6.pl -p=diamond -core...'	v6.3.0 (diamond v2.0.15)
10	default_po5	108.35666666666667	0.07571877794400485	0.3401946666666667	1.0153488727196427e-4	3			oneblast_bin1k_proteinortho_total_maxnodes5k = 'proteinortho6.pl -omni -bin=1000 -subparaCluster="-maxnodes 5000" FASTAFILES'	v6.3.0 (diamond v2.0.15)	bin=1000 is default now for -omni
10	halfblast_sensitive_proteinortho_total_threads_per_process4_maxnodes5k	8.263333333333334	0.30615900008546826	0.14029066666666667	0.0010699707161101802	3			pseudo_proteinortho = 'proteinortho6.pl -pseudo -subparaCluster="-maxnodes 5000" FASTAFILES'	v6.3.0 (diamond v2.0.15)	new default, maxnodes 5000 is default for the clustering of Proteinortho6 as well
10	oneblast_bin1k_proteinortho_total_maxnodes5k	23.373333333333335	0.11150485789118483	0.5134173333333333	0.0021334154150876093	3			sonicparanoid_diamond = 'sonicparanoid --modus sensitive --aln-tool diamond -o . -i FASTADIR'	v1.3.8 (diamond v2.0.15)
10	sensitive_proteinortho_total_threads_per_process4_maxnodes5k	12.593333333333332	0.29501412395567367	0.15359866666666666	0.004612638868731583	3			sensitive_proteinortho_total_threads_per_process4_maxnodes5k = 'proteinortho6.pl -nopseudo -p=diamond -subparaCluster="-maxnodes 5000" FASTAFILES'	v6.3.0 (diamond v2.0.15)	this corresponds to the classical reciprocal best hit algorithm
10	sensitive_sonicparanoid_diamond	24.25	0.10583005244258338	0.34752266666666665	0.15953263201405954	3			default_orthofinder = 'orthofinder -og -f FASTADIR' (uses MMSeqs2 as default)	v2.5.4 (MMSeqs v14.7e284)	-og stops after the orthology prediction (no tree inference)
20	default_orthofinder	68.43	0	0.302848	8.399999999998884e-5	3			default_po5 = 'proteinortho5.pl FASTAFILES'	v5.16b (ncbi-blast v2.13.0)
20	default_po5	555.7966666666666	0.31469562013685287	1.1907893333333333	0.008926186494429465	3			OMA => first use OMA -p to generate a parameter file, set the OutgroupSpecies := none, then call OMA -n THREADS to execute (fasta files need to be in a directory called DB and end with .fa instead of .fasta)	v2.5.0
20	halfblast_sensitive_proteinortho_total_threads_per_process4_maxnodes5k	27.59	0.20663978319771756	0.23109066666666667	0.002663730717120886	3
20	oneblast_bin1k_proteinortho_total_maxnodes5k	56.22666666666667	0.25890796305508196	0.902992	0.003463436443765039	3			system = AMD_EPYC 64 threads
20	sensitive_proteinortho_total_threads_per_process4_maxnodes5k	48.333333333333336	1.1515352071618679	0.28307066666666664	0.001210661527155032	3			the IDs of uniprot_x dataset can be found in table "shuffled uniprot_x 2022_03"
20	sensitive_sonicparanoid_diamond	54.86	0.0754983443527066	0.275672	0.0011640481089714404	3
30	default_orthofinder	137.01666666666668	0.6350852961085851	0.52462	0.0012279609114299785	3
30	default_po5	998.5333333333334	0.6006940430313612	1.9014173333333333	0.011152109277322112	3
30	halfblast_sensitive_proteinortho_total_threads_per_process4_maxnodes5k	61.1	0.207846096908267	0.298076	0.005211751337122672	3
30	oneblast_bin1k_proteinortho_total_maxnodes5k	108.36	0.4350861983561439	1.438752	0.003589130256761379	3
30	sensitive_proteinortho_total_threads_per_process4_maxnodes5k	111.55666666666667	1.1577708466416607	0.3699573333333333	0.011745047183103765	3
30	sensitive_sonicparanoid_diamond	115.57666666666667	0.16502525059315334	0.4710933333333333	0.0035496936957057847	3
40	default_orthofinder	213.66666666666666	0.005773502691891007	0.7074813333333333	0.0023233125776213168	3
40	default_po5	1529.9033333333332	2.1968689841073625	2.1222106666666667	0.011484087309548465	3
40	halfblast_sensitive_proteinortho_total_threads_per_process4_maxnodes5k	101.22	0.9628603221651699	0.316356	0.009914375825033073	3
40	oneblast_bin1k_proteinortho_total_maxnodes5k	165.00333333333333	0.46436336347018115	1.8890453333333332	0.005187408344571769	3
40	sensitive_proteinortho_total_threads_per_process4_maxnodes5k	188.52333333333334	3.6593077669599325	0.39158533333333334	0.0054080123274021135	3
40	sensitive_sonicparanoid_diamond	180.34333333333333	0.17009801096230334	0.6286053333333333	0.0011423928104349126	3
50	default_orthofinder	321.87	0.6323764701505105	0.9566533333333334	0.0023395908474204054	3
50	default_po5	2485.22	3.241542842536235	2.2720066666666665	0.04291104572640172	3
50	halfblast_sensitive_proteinortho_total_threads_per_process4_maxnodes5k	164.90333333333334	2.691585654095616	0.541296	0.0673480762605733	3
50	oneblast_bin1k_proteinortho_total_maxnodes5k	237.64	0.9792343948207667	2.5598039999999997	0.0011998066510900869	3
50	sensitive_proteinortho_total_threads_per_process4_maxnodes5k	295.43666666666667	5.771397866490671	0.56278	0.019458364576705807	3
50	sensitive_sonicparanoid_diamond	274.61	0.15588457268118847	0.83986	3.555277766923546e-5	3
100	default_orthofinder	1224.0933333333332	0.6381483631047428	2.6681613333333334	1.1800564958233336e-4	3
100	default_po5	11252.586666666666	19.19752414592388	3.450088	0.043320313202930595	3
100	halfblast_sensitive_proteinortho_total_threads_per_process4_maxnodes5k	616.1266666666667	51.234301335465965	1.5203866666666666	0.028644703896764774	3
100	oneblast_bin1k_proteinortho_total_maxnodes5k	880.8399999999999	1.1434596626029188	6.94968	0.0034402767330551356	3
100	sensitive_proteinortho_total_threads_per_process4_maxnodes5k	1243.26	20.98492554192177	1.4467693333333334	0.004261628483729313	3
100	sensitive_sonicparanoid_diamond	1003.6866666666666	99.75458151550399	2.166864	1.2630122723063112e-4	3
150	default_orthofinder	2777.0133333333333	42.507416215683406	4.758277333333333	0.0023098201950226605	3
150	default_po5	27840.946666666667	351.11739152786544	4.148982666666667	0.04771626713536313	3
150	halfblast_sensitive_proteinortho_total_threads_per_process4_maxnodes5k	1577.6733333333334	18.715582634086875	2.13526	0.07299460933521046	3
150	oneblast_bin1k_proteinortho_total_maxnodes5k	1938.8933333333332	15.80054534923826	10.360549333333333	3.604959546696627e-4	3
150	sensitive_proteinortho_total_threads_per_process4_maxnodes5k	2817.86	49.11928440032507	2.0631066666666666	0.04392667787726889	3
150	sensitive_sonicparanoid_diamond	2096.4333333333334	216.27253739976624	3.799624	4.0053963599135295e-4	3
200	default_orthofinder	4720.8533333333335	255.71390778237594	7.42268	0.0013233835422885839	3
200	default_po5	53314.97	5515.4573354074655	4.772648	0.04687218757429646	3
200	halfblast_sensitive_proteinortho_total_threads_per_process4_maxnodes5k	2980.4166666666665	26.32503434628972	2.676406666666667	0.1915216394805908	3
200	oneblast_bin1k_proteinortho_total_maxnodes5k	3580	48.57435846205279	18.77828	3.5136306009658335e-4	3
200	sensitive_proteinortho_total_threads_per_process4_maxnodes5k	5423.936666666667	106.13768903331815	2.669524	0.0954748220632015	3
200	sensitive_sonicparanoid_diamond	3842.93	400.81876789890964	5.937608	1.817250670654386e-4	3
250	default_orthofinder	7261.35	578.1475175939092	10.015845333333333	1.2035503036144472e-4	3
250	default_po5	72106.76333333334	1237.3505367652826	4.951238666666667	0.04063667099226211	3
250	halfblast_sensitive_proteinortho_total_threads_per_process4_maxnodes5k	4447.636666666666	481.8966781721298	3.1633653333333336	0.09728879050195528	3
250	oneblast_bin1k_proteinortho_total_maxnodes5k	5505.876666666667	77.1310484392196	28.68845866666667	0.0011825215995210064	3
250	sensitive_proteinortho_total_threads_per_process4_maxnodes5k	8014.410000000001	663.5755803222422	3.132530666666667	0.10056335796567917	3
250	sensitive_sonicparanoid_diamond	5893.383333333333	618.7857653771082	8.106516	6.584831053308107e-5	3
500	default_orthofinder	27632.913333333334	1861.3572215008421	26.460101333333334	2.5444318291729874e-4	3
500	halfblast_sensitive_proteinortho_total_threads_per_process4_maxnodes5k	18184.11666666667	2021.7987981085896	6.319885333333334	0.09925040770361278	3
500	oneblast_bin1k_proteinortho_total_maxnodes5k	21236.536666666667	33.56560789458991	105.55946133333333	0.6058946176665841	3
500	sensitive_proteinortho_total_threads_per_process4_maxnodes5k	30234.989999999998	2729.757071407637	6.2170586666666665	0.09437162796801428	3
500	sensitive_sonicparanoid_diamond	21863.746666666666	2360.070927034468	20.27115866666667	0.002152662847111654	3
1000	halfblast_sensitive_proteinortho_total_threads_per_process4_maxnodes5k	76740.49666666667	1909.8654619195931	21.520889333333333	0.0496645925115003	3
1000	sensitive_sonicparanoid_diamond	82016.04000000001	882.1015673945915	52.59276800000001	1.414213562369799e-4	2	<- one did not finish but this is fine
10	OMA	1004.99	66.53223203831351	1.1066053333333332	5.922882181281132e-4	3
20	OMA	4056.1	24.26412784338231	1.7059333333333333	0.004468602167717836	3
30	OMA	9685.44	730.2860225281594	2.185432	0.02475800185798517	3
40	OMA	17147.933333333334	1370.9444987428683	2.688768	0.020408662082556945	3
50	OMA	24027.053333333333	246.45097227102514	2.7804586666666666	0.009050576408899667	3

## Sheet: clustering evaluation
algorithm	total ortho-groups	ortho-groups with species 0-25%	ortho-groups with species 25-50%	ortho-groups with species 50-75%	ortho-groups with species 75-100%	core-groups	max proteins per core-group	ARI compared to Proteinortho5	note	*_diamond = diamond with -sensitive core_group = group that spans all species
default_step2_po5	83543	79812	2646	988	97	0	0	1.0
po5_clustering_using_diamond	79184	75429	2674	984	97	0	0	0.8160833032284794	using the blast-graph of proteinortho6 as input for Proteinortho5 clustering
omni_step2_diamond	70830	66609	2969	1149	103	0	0	0.8218072983047073
pseudo_step2_diamond	71716	67436	2992	1183	105	0	0	0.8215547650818682	this would be the new default !
conn0.05_diamond	65413	60930	3044	1292	147	1	97	0.8186843350417987
canonical + default clustering	72003	67773	2940	1184	106	1	97	0.8210679565488163
conn0.2_diamond	78739	74859	2826	994	60	0	0	0.7965308834360874
conn0.3_diamond	82824	79231	2722	831	40	0	0	0.7689882611582091
conn0.01_diamond	52952	48209	3058	1454	231	9	149	0.7059471996914821
conn0.5_diamond	90080	87160	2425	484	11	0	0	0.691785951044441
conn0.75_diamond	98641	96523	1922	186	10	0	0	0.6055121234572941
core_diamond_coreMaxProts5	46093	41761	2534	1399	399	48	289	0.464228742074972
core_diamond_coreMaxProts10	43739	39661	2369	1317	392	51	706	0.35175682514027923	default core algorithm (in manuscript simply "core")
core_diamond_coreMaxProts20	42732	38805	2285	1261	381	53	1329	0.2652312287708627
core_diamond_coreMaxProts0	42446	38541	2268	1261	376	55	2180	0.19247875625769575	0 = no coreMaxProts cutoff = use core algorithm without this limitation
conn0.005_diamond	48165	43405	3004	1494	262	12	152	0.14992874987445187
conn0.001_diamond	41543	36941	2807	1476	319	30	315	0.1411191752497908
conn0.00001_diamond	35553	31885	2108	1183	377	50	2516	0.09225946795800444

## Sheet: sensitivity,precision of blast 
algorithm	edges	sensitivity	precision	wall time in h	memory in GB
\prog{po5}	5434515	100	100	77.76	96.62		Sensitivity, precision and resource consumption of sequence comparisons in the context of the adaptive reciprocal best hit strategy employed by \prog{Proteinortho} applied to the QfO benchmark dataset \texttt{${2020_{04}}$}.
\prog{ucscblat}	1158335	20.02	93.95	0.34	2.16		Sensitivity and precision are given relative to the \prog{BLAST} results.
\prog{notsensitive diamond}	4701821	76.99	88.98	0.54	5.72		wall time: total processing time,
\prog{diamond sensitive}	5365626	88.38	89.52	0.93	6.17		memory: peak memory usage,
\prog{pseudo diamond}	5417121	88.65	88.94	0.44	4.84
\prog{omni bin1k diamond}	5096308	84.77	90.4	0.46	9.83
\prog{diamond ultrasens}	5456552	89.7	89.34	3.26	6.74		input dataset qfo 2020_04		po5 = default proteinortho5
\prog{diamond fast}	3894281	63.75	88.96	0.51	4.47
\prog{lastp}	4852837	79.46	88.99	0.78	8.75		64 core AMD_EPYC
\prog{lastp m100}	5117534	84.19	89.4	2.33	20.18
\prog{lastp m1000}	5239090	86.24	89.46	16.52	25.39
\prog{mmseqsp}	5148571	85.63	90.38	3.49	12.68
\prog{mmseqsp s1}	3877094	63.99	89.7	0.67	9.17
\prog{mmseqsp s7.5}	5234995	87.07	90.38	12.02	12.87
\prog{rapsearch}	2780868	46.63	91.13	16.86	11
\prog{topaz}	5025022	82.26	88.97	4.86	10.2
\prog{topaz fast}	5025018	82.26	88.97	4.5	10.54
\prog{ublast}	5167222	81.13	85.32	1.75	22.9
\prog{usearch}	3215305	51.77	87.51	0.41	2.09

## Sheet: qfo 2020_04 benchmark results
participant_id	participant_type	metrix_id	metric_x	metric_y	stderr_x	stderr_y	reference tools are downloaded from QfO Benchmark website (https://orthology.benchmarkservice.org/proxy/projects/2020/)	tool with description from QfO benchmark website (as much information as possible). For Proteinortho5+6 own desriptions are added	po5_clustering_using_diamond = using the output of step=2 from Proteinortho6 with diamond as input for Proteinortho5 clustering step
BBH	reference tools	QfO:G_STD2_Fungi	11405	0.26533333	183.90106	0.0084550385		conn0.00001_diamond-groups = Proteinortho6 with diamond and -conn=0.00001 (very low, so almost no clustering is done on the blast graph). _groups = using the OrthoXML as input for the benchmark instead of the list of edges	Proteinortho6 = v6.3.0 (diamond v2.0.15)
po5_clustering_using_diamond	proteinortho v5	QfO:G_STD2_Fungi	4925	0.23908333	130.59966	0.0082026228		omni_bin1k_step2_diamond = Proteinortho6 with omni using 1k size binning and diamond	po5 = Proteinortho5 = v5.16b (ncbi-blast v2.13.0)
OrthoFinder_MSA_v2.5.2	reference tools	QfO:G_STD2_Fungi	14411	0.28855326	198.50709	0.011364966		core_diamond_coreMaxProts10 = Proteinortho6 with core and coreMaxProts 10 (maximal number of proteins per species per group, overrules the core algorithm)
Domainoid+	reference tools	QfO:G_STD2_Fungi	11604	0.26925	185.01968	0.0084652955		pseudo_step2_diamond = Proteinortho6 with pseudo and diamond
PANTHER_16_all	reference tools	QfO:G_STD2_Fungi	13687	0.30541667	195.41427	0.0090660905		default_step2_po5 = default proteinortho5
OrthoInspector 3	reference tools	QfO:G_STD2_Fungi	12608	0.26416667	190.3196	0.0086078855		Proteinortho6 canonical defaultclustering = not omni and not pseudo	so called "canonical" approach = classical reciprocal best hit algorithm
OrthoMCL	reference tools	QfO:G_STD2_Fungi	14887	0.34708333	200.40504	0.010256166
phylomedb_v5	reference tools	QfO:G_STD2_Fungi	10825	0.27616667	180.50512	0.0086832109		reference tools are downloaded from : https://orthology.benchmarkservice.org/proxy/projects/2020/
Hieranoid_2	reference tools	QfO:G_STD2_Fungi	10821	0.259	180.48098	0.0085201693		From the website:
OMA_Groups	reference tools	QfO:G_STD2_Fungi	3957	0.22366667	118.31394	0.0079369246		Domainoid+ = "Domainoid is a program for automatic identification of domain-based orthologs. Domainoid builds on top of the InParanoid algorithm, and uses domains from Pfam to infer orthologs on a domain level. The domain-level-orhtologs have been reconstructed on the full protein level in order to be compatible with the benchmark, using an alpha threshold of 0.4. The Domainoid orthologs are used…
oneblast_bin1k_step2_diamond	oneblast_bin1k_step2_diamond	QfO:G_STD2_Fungi	6416	0.23983333	146.57732	0.0081302808		Hieranoid 2 = "Orthology inference method using a hierarchical approach. Hieranoid performs pairwise orthology analysis using InParanoid at each node in a guide tree as it progresses from its leaves to the root. It combines efficient graph-based methodology with aspects of compute-intensive tree-based methods"
sonicparanoid	reference tools	QfO:G_STD2_Fungi	10424	0.269	178.03452	0.0084486512		InParanoid = "InParanoid is a program for automatic identification of orthologs while differentiating between inparalogs and outparalogs. An InParanoid cluster is seeded by a reciprocally bestmatching ortholog pair, around which inparalogs are gathered independently, while outparalogs are excluded. The InParanoid database is a collection of pairwise ortholog groups aiming to include all 'complete…
RSD	reference tools	QfO:G_STD2_Fungi	10248	0.26225	176.91723	0.0085039873		MethaPhOrs = "MetaPhOrs is a public repository of phylogeny-based orthologs and paralogs that were computed using phylogenetic trees available in twelve public repositories"
default_step2_po5	proteinortho v5	QfO:G_STD2_Fungi	4615	0.24991667	126.85661	0.0082346638		OMA GETHOGs = "OMA is a publicly available resource (http://omabrowser.org/) that provides orthology predictions among thousands of proteomes from all domains of life. OMA uses evolutionary distance estimates from Smith���Waterman alignments to infer orthologs. A distinct feature among graph-based methods is the witness of nonorthology step in its pipeline, where cases of differential gene losses…
MetaPhOrs_v.2.5	reference tools	QfO:G_STD2_Fungi	11846	0.28641667	186.34896	0.0087874812		OMA Groups = "OMA is a publicly available resource (http://omabrowser.org/) that provides orthology predictions among thousands of proteomes from all domains of life. OMA uses evolutionary distance estimates from Smith���Waterman alignments to infer orthologs. A distinct feature among graph-based methods is the witness of nonorthology step in its pipeline, where cases of differential gene losses …
core_diamond_coreMaxProts10	core_diamond_coreMaxProts10	QfO:G_STD2_Fungi	7934	0.25191667	160.13371	0.0083182789		OMA Pairs = "OMA is a publicly available resource (http://omabrowser.org/) that provides orthology predictions among thousands of proteomes from all domains of life. OMA uses evolutionary distance estimates from Smith���Waterman alignments to infer orthologs. A distinct feature among graph-based methods is the witness of nonorthology step in its pipeline, where cases of differential gene losses g…
OMA_Pairs	reference tools	QfO:G_STD2_Fungi	6474	0.23916667	147.14035	0.0080896566		OrthoFinder-2.5.2-MSA = "OrthoFinder 2.5.2 using BLAST and multiple sequence alignment tree.Command: "orthofinder -S blast -f -M msa 2011_04_reference_proteomes/" "
PANTHER__16__LDO__only	reference tools	QfO:G_STD2_Fungi	11844	0.28416667	186.33811	0.0089241311		OrthoInspector 3 = "OrthoInspector is a database of precomputed orthology and inparalogy relationships and a stand-alone package allowing large-scale predictions of orthology between thousands of proteomes (http://lbgi.fr/orthoinspector/). The specific version (v1.30) for the Quest for orthologs benchmark used a 1.10-9 blast Evalue threshold. The resource has recently undergone a major new releas…
halfblast_step2_diamond	halfblast_step2_diamond	QfO:G_STD2_Fungi	6627	0.24308333	148.60701	0.0081592432		OrthoMCL = "OrthoMCL provides a scalable method for constructing orthologous groups across a wide range of species in Eukaryota, Bacteria, and Archaea. The algorithm calculates Blast scores between every pair of proteins in order to identify putative orthologs and paralogs. The Blast scores are canonicalized to account for betwen-species sequence divergence. Then, OrthoMCL employs a Markov Cluste…
Ensembl_Compara	reference tools	QfO:G_STD2_Fungi	12357	0.30008333	189.04696	0.0092165642		PANTHER 16.0 (All) = "The PANTHER (Protein ANalysis THrough Evolutionary Relationships) Classification System was designed to classify proteins (and their genes) in order to facilitate high-throughput analysis. PANTHER LDO will return only least diverged ortholog for each gene (single best ortholog)"
OMA_GETHOGs	reference tools	QfO:G_STD2_Fungi	6616	0.24075	148.50245	0.0082215072		PANTHER 16.0 (LDO only) = "The PANTHER (Protein ANalysis THrough Evolutionary Relationships) Classification System was designed to classify proteins (and their genes) in order to facilitate high-throughput analysis. PANTHER LDO will return only least diverged ortholog for each gene (single best ortholog)"
SonicParanoid2	reference tools	QfO:G_STD2_Fungi	13347	0.29108333	193.87315	0.0090813842		PhylomeDB V5 = "PhylomeDB is a public database for complete catalogs of gene phylogenies (phylomes)."
conn0.00001_diamond-groups	conn0.00001_diamond	QfO:G_STD2_Fungi	16902	0.61858333	207.3199	0.012396537		RBH/BBH = "Reciprocal best hits. Classic method consisting of identifying the pairs of genes with mutually highest alignment score between every pair of species. Use reciprocal blastp hits as orthologs, with minimum E-value of 1e���2, keep all hits that are ���99% of the highest score."
BBH	reference tools	QfO:SwissTrees	0.56278288	0.93223643	0.033593403	0.036346031		RSD = "Roundup is a large-scale orthology database. The orthologs are computed using the Reciprocal Smallest Distance (RSD) algorithm. Reciprocal Smallest Distance (RSD) is a pairwise orthology algorithm that uses global sequence alignment and maximum likelihood evolutionary distance between sequences to accurately detects orthologs between genomes. This dataset is computed using a divergence par…
po5_clustering_using_diamond	proteinortho v5	QfO:SwissTrees	0.51501905	0.94736847	0.035681115	0.033991782		SonicParanoid = "version: 1.0.9 mode: sensitive Length difference threshold = 0.5 "
OrthoFinder_MSA_v2.5.2	reference tools	QfO:SwissTrees	0.78797908	0.9485345	0.032552988	0.028856861		SonicParanoid_sensitive = "version: 1.0.9 mode: sensitive Length difference threshold = 0.5 "
Domainoid+	reference tools	QfO:SwissTrees	0.74373671	0.93956259	0.033391458	0.029079398
PANTHER_16_all	reference tools	QfO:SwissTrees	0.76077636	0.94021762	0.032135054	0.028215595		SonicParanoid2 = no information provided about version and paramters as of 16.7.2023
OrthoInspector 3	reference tools	QfO:SwissTrees	0.72467432	0.93380831	0.034006723	0.029516434
OrthoMCL	reference tools	QfO:SwissTrees	0.70211089	0.86704801	0.032724098	0.03113087
phylomedb_v5	reference tools	QfO:SwissTrees	0.67189371	0.93591894	0.032121351	0.039948966
Hieranoid_2	reference tools	QfO:SwissTrees	0.66382046	0.94458138	0.033887493	0.031015143
OMA_Groups	reference tools	QfO:SwissTrees	0.47656418	0.93470499	0.034336953	0.038162211
oneblast_bin1k_step2_diamond	oneblast_bin1k_step2_diamond	QfO:SwissTrees	0.55017606	0.95216422	0.034131761	0.032396101
sonicparanoid	reference tools	QfO:SwissTrees	0.66859982	0.94032132	0.034022473	0.029955825
RSD	reference tools	QfO:SwissTrees	0.52793892	0.91590451	0.033966935	0.036226388
default_step2_po5	proteinortho v5	QfO:SwissTrees	0.50864415	0.94443786	0.034598743	0.036183059
MetaPhOrs_v.2.5	reference tools	QfO:SwissTrees	0.76266728	0.93588345	0.032810552	0.029368736
core_diamond_coreMaxProts10	core_diamond_coreMaxProts10	QfO:SwissTrees	0.58459287	0.94837874	0.034024656	0.032482707
OMA_Pairs	reference tools	QfO:SwissTrees	0.65149962	0.9288532	0.033688271	0.031332894
PANTHER__16__LDO__only	reference tools	QfO:SwissTrees	0.5326208	0.93696038	0.032743937	0.04035482
halfblast_step2_diamond	halfblast_step2_diamond	QfO:SwissTrees	0.5507711	0.951123	0.034237682	0.032954133
Ensembl_Compara	reference tools	QfO:SwissTrees	0.69521142	0.90125327	0.034950635	0.033918393
OMA_GETHOGs	reference tools	QfO:SwissTrees	0.68140245	0.927239	0.032979727	0.030260775
SonicParanoid2	reference tools	QfO:SwissTrees	0.73117182	0.86753752	0.03365727	0.029734326
conn0.00001_diamond-groups	conn0.00001_diamond	QfO:SwissTrees	0.76349228	0.6469633	0.032891161	0.02618701
BBH	reference tools	QfO:GO	90561	0.48931723	0	0.0015170467
po5_clustering_using_diamond	proteinortho v5	QfO:GO	76667	0.49120044	0	0.0016588456
OrthoFinder_MSA_v2.5.2	reference tools	QfO:GO	154934	0.46762129	0	0.001158263
Domainoid+	reference tools	QfO:GO	183591	0.46393558	0	0.0010670378
PANTHER_16_all	reference tools	QfO:GO	208022	0.45675326	0	0.00099526397
OrthoInspector 3	reference tools	QfO:GO	152202	0.47066499	0	0.0011612985
OrthoMCL	reference tools	QfO:GO	183578	0.46214355	0	0.0010585378
phylomedb_v5	reference tools	QfO:GO	101291	0.479695	0	0.001442203
Hieranoid_2	reference tools	QfO:GO	146551	0.46841158	0	0.0011925843
OMA_Groups	reference tools	QfO:GO	64039	0.49459844	0	0.0018216978
oneblast_bin1k_step2_diamond	oneblast_bin1k_step2_diamond	QfO:GO	82913	0.4888155	0	0.0015913058
sonicparanoid	reference tools	QfO:GO	169199	0.458458	0	0.0011055954
RSD	reference tools	QfO:GO	84685	0.48890869	0	0.0015782269
default_step2_po5	proteinortho v5	QfO:GO	74817	0.49200628	0	0.0016833642
MetaPhOrs_v.2.5	reference tools	QfO:GO	135553	0.4753724	0	0.0012430489
core_diamond_coreMaxProts10	core_diamond_coreMaxProts10	QfO:GO	97137	0.48390025	0	0.0014637988
OMA_Pairs	reference tools	QfO:GO	113909	0.4749235	0	0.0013637868
PANTHER__16__LDO__only	reference tools	QfO:GO	78794	0.49557399	0	0.0016404064
halfblast_step2_diamond	halfblast_step2_diamond	QfO:GO	85310	0.48770309	0	0.0015665555
Ensembl_Compara	reference tools	QfO:GO	375206	0.42841259	0	0.00071727284
OMA_GETHOGs	reference tools	QfO:GO	352212	0.41103547	0	0.00069282904
SonicParanoid2	reference tools	QfO:GO	199165	0.45319304	0	0.0010157581
conn0.00001_diamond-groups	conn0.00001_diamond	QfO:GO	1966897	0.39107851	0	0.00027428421
BBH	reference tools	QfO:EC	143283	0.95354058	0	0.0007620973
po5_clustering_using_diamond	proteinortho v5	QfO:EC	123266	0.97045323	0	0.00063255116
OrthoFinder_MSA_v2.5.2	reference tools	QfO:EC	177405	0.9306335	0	0.00085906934
Domainoid+	reference tools	QfO:EC	219860	0.90360296	0	0.00087031308
PANTHER_16_all	reference tools	QfO:EC	201349	0.92370486	0	0.00084691868
OrthoInspector 3	reference tools	QfO:EC	194615	0.93031547	0	0.00079719031
OrthoMCL	reference tools	QfO:EC	223967	0.92086419	0	0.00081357357
phylomedb_v5	reference tools	QfO:EC	121481	0.95128341	0	0.0008531677
Hieranoid_2	reference tools	QfO:EC	169055	0.9449386	0	0.00075248624
OMA_Groups	reference tools	QfO:EC	96646	0.9739499	0	0.00069678953
oneblast_bin1k_step2_diamond	oneblast_bin1k_step2_diamond	QfO:EC	134749	0.97134183	0	0.00059423675
sonicparanoid	reference tools	QfO:EC	191303	0.91714752	0	0.0008641852
RSD	reference tools	QfO:EC	137663	0.94889316	0	0.0008227332
default_step2_po5	proteinortho v5	QfO:EC	123328	0.96799613	0	0.00066475095
MetaPhOrs_v.2.5	reference tools	QfO:EC	157025	0.93927922	0	0.00084138338
core_diamond_coreMaxProts10	core_diamond_coreMaxProts10	QfO:EC	156286	0.95625874	0	0.0006983392
OMA_Pairs	reference tools	QfO:EC	149624	0.95480723	0	0.00072503486
PANTHER__16__LDO__only	reference tools	QfO:EC	112334	0.96269327	0	0.0007685277
halfblast_step2_diamond	halfblast_step2_diamond	QfO:EC	136906	0.96706849	0	0.00063713799
Ensembl_Compara	reference tools	QfO:EC	295273	0.84686931	0	0.00097015112
OMA_GETHOGs	reference tools	QfO:EC	294320	0.82105962	0	0.00098455097
SonicParanoid2	reference tools	QfO:EC	244788	0.87149657	0	0.0009661829
conn0.00001_diamond-groups	conn0.00001_diamond	QfO:EC	1988427	0.67271897	0	0.00039693019
BBH	reference tools	QfO:STD_Eukaryota	9918	0.045657727	140.55969	0.0029094714
po5_clustering_using_diamond	proteinortho v5	QfO:STD_Eukaryota	7323	0.041330966	134.65329	0.003287725
OrthoFinder_MSA_v2.5.2	reference tools	QfO:STD_Eukaryota	13283	0.054756707	134.62852	0.0026549815
Domainoid+	reference tools	QfO:STD_Eukaryota	13982	0.0434368	131.36222	0.0023272499
PANTHER_16_all	reference tools	QfO:STD_Eukaryota	14444	0.056805594	128.77024	0.0025766132
OrthoInspector 3	reference tools	QfO:STD_Eukaryota	12138	0.039915966	138.39887	0.0023885277
OrthoMCL	reference tools	QfO:STD_Eukaryota	11117	0.26828281	140.21328	0.0068564784
phylomedb_v5	reference tools	QfO:STD_Eukaryota	12355	0.058963982	137.82854	0.0028900158
Hieranoid_2	reference tools	QfO:STD_Eukaryota	11227	0.036608177	140.08564	0.0024211735
OMA_Groups	reference tools	QfO:STD_Eukaryota	7745	0.037163762	136.26026	0.0030885174
oneblast_bin1k_step2_diamond	oneblast_bin1k_step2_diamond	QfO:STD_Eukaryota	7702	0.043451917	136.10855	0.0032762459
sonicparanoid	reference tools	QfO:STD_Eukaryota	12338	0.038336846	137.87561	0.002328584
RSD	reference tools	QfO:STD_Eukaryota	10929	0.06287553	140.39394	0.0032439611
default_step2_po5	proteinortho v5	QfO:STD_Eukaryota	7325	0.043139932	134.66153	0.0033192298
MetaPhOrs_v.2.5	reference tools	QfO:STD_Eukaryota	14570	0.067421643	128.00027	0.002828793
core_diamond_coreMaxProts10	core_diamond_coreMaxProts10	QfO:STD_Eukaryota	8827	0.044050451	139.21069	0.0030144122
OMA_Pairs	reference tools	QfO:STD_Eukaryota	10357	0.038637315	140.65431	0.0026211826
PANTHER__16__LDO__only	reference tools	QfO:STD_Eukaryota	7484	0.037791733	135.29759	0.0030529933
halfblast_step2_diamond	halfblast_step2_diamond	QfO:STD_Eukaryota	7910	0.041045091	136.81746	0.0031142354
Ensembl_Compara	reference tools	QfO:STD_Eukaryota	13880	0.071001441	131.88695	0.0029479299
OMA_GETHOGs	reference tools	QfO:STD_Eukaryota	7430	0.038829071	135.08582	0.0031422199
SonicParanoid2	reference tools	QfO:STD_Eukaryota	12544	0.058075574	137.27777	0.0029636018
conn0.00001_diamond-groups	conn0.00001_diamond	QfO:STD_Eukaryota	12324	0.58283295	137.91406	0.0073474974
BBH	reference tools	QfO:STD_Bacteria	985	0.56886633	58.391519	0.018476883
po5_clustering_using_diamond	proteinortho v5	QfO:STD_Bacteria	660	0.52512626	48.655518	0.0219142
OrthoFinder_MSA_v2.5.2	reference tools	QfO:STD_Bacteria	1017	0.57317273	59.226503	0.018191123
Domainoid+	reference tools	QfO:STD_Bacteria	1165	0.59041488	62.862672	0.016866354
PANTHER_16_all	reference tools	QfO:STD_Bacteria	1166	0.61921098	62.886069	0.016808186
OrthoInspector 3	reference tools	QfO:STD_Bacteria	1129	0.58953351	62.010377	0.016967181
OrthoMCL	reference tools	QfO:STD_Bacteria	1619	0.6612621	72.166845	0.014547561
phylomedb_v5	reference tools	QfO:STD_Bacteria	692	0.53407996	49.735252	0.021969573
Hieranoid_2	reference tools	QfO:STD_Bacteria	1034	0.56640877	59.662642	0.018253409
OMA_Groups	reference tools	QfO:STD_Bacteria	587	0.51590006	46.065727	0.024113443
oneblast_bin1k_step2_diamond	oneblast_bin1k_step2_diamond	QfO:STD_Bacteria	765	0.54172113	52.086349	0.020496842
sonicparanoid	reference tools	QfO:STD_Bacteria	862	0.5528809	54.997464	0.019653354
RSD	reference tools	QfO:STD_Bacteria	957	0.5756705	57.645366	0.018799384
default_step2_po5	proteinortho v5	QfO:STD_Bacteria	658	0.53090172	48.586968	0.022414194
MetaPhOrs_v.2.5	reference tools	QfO:STD_Bacteria	693	0.52801828	49.768488	0.022655586
core_diamond_coreMaxProts10	core_diamond_coreMaxProts10	QfO:STD_Bacteria	928	0.56420618	56.856634	0.018575689
OMA_Pairs	reference tools	QfO:STD_Bacteria	871	0.55128205	55.256463	0.019824048
PANTHER__16__LDO__only	reference tools	QfO:STD_Bacteria	912	0.55747442	56.41429	0.019141736
halfblast_step2_diamond	halfblast_step2_diamond	QfO:STD_Bacteria	778	0.54113111	52.489883	0.020251342
Ensembl_Compara	reference tools	QfO:STD_Bacteria	1130	0.60029499	62.034319	0.017739475
OMA_GETHOGs	reference tools	QfO:STD_Bacteria	1124	0.58800415	61.890435	0.017803578
SonicParanoid2	reference tools	QfO:STD_Bacteria	1746	0.67325315	74.37084	0.013865607
conn0.00001_diamond-groups	conn0.00001_diamond	QfO:STD_Bacteria	3230	0.79641383	91.555164	0.0088098046
BBH	reference tools	QfO:STD_Fungi	9399	0.32512324	166.32961	0.0055087598
po5_clustering_using_diamond	proteinortho v5	QfO:STD_Fungi	5387	0.29233958	133.87175	0.0072913539
OrthoFinder_MSA_v2.5.2	reference tools	QfO:STD_Fungi	11235	0.34632844	176.348	0.0052795228
Domainoid+	reference tools	QfO:STD_Fungi	9743	0.32891991	168.3978	0.0055328605
PANTHER_16_all	reference tools	QfO:STD_Fungi	11661	0.3738816	178.33424	0.0055135395
OrthoInspector 3	reference tools	QfO:STD_Fungi	9996	0.32861478	169.86033	0.0054821743
OrthoMCL	reference tools	QfO:STD_Fungi	10937	0.40978635	174.88623	0.0060385814
phylomedb_v5	reference tools	QfO:STD_Fungi	9289	0.32411096	165.64842	0.0057079363
Hieranoid_2	reference tools	QfO:STD_Fungi	9084	0.3221048	164.35262	0.0056712167
OMA_Groups	reference tools	QfO:STD_Fungi	5118	0.29064088	130.98964	0.0076816362
oneblast_bin1k_step2_diamond	oneblast_bin1k_step2_diamond	QfO:STD_Fungi	6198	0.2981607	141.91328	0.0068432852
sonicparanoid	reference tools	QfO:STD_Fungi	8680	0.31747312	161.69589	0.0057993491
RSD	reference tools	QfO:STD_Fungi	9137	0.32616468	164.69095	0.0057320253
default_step2_po5	proteinortho v5	QfO:STD_Fungi	5202	0.30555556	131.90202	0.0075953962
MetaPhOrs_v.2.5	reference tools	QfO:STD_Fungi	10033	0.34560949	170.07015	0.0057387433
core_diamond_coreMaxProts10	core_diamond_coreMaxProts10	QfO:STD_Fungi	7265	0.3039688	151.21402	0.0062813493
OMA_Pairs	reference tools	QfO:STD_Fungi	6683	0.30036411	146.30646	0.0066493805
PANTHER__16__LDO__only	reference tools	QfO:STD_Fungi	9518	0.33315823	167.05562	0.0056213717
halfblast_step2_diamond	halfblast_step2_diamond	QfO:STD_Fungi	6380	0.2984326	143.59596	0.0067237851
Ensembl_Compara	reference tools	QfO:STD_Fungi	10349	0.36362612	171.82068	0.0057891533
OMA_GETHOGs	reference tools	QfO:STD_Fungi	5713	0.29990081	137.21597	0.0071524513
SonicParanoid2	reference tools	QfO:STD_Fungi	10585	0.36313966	173.08053	0.005652593
conn0.00001_diamond-groups	conn0.00001_diamond	QfO:STD_Fungi	12832	0.62342841	183.19635	0.0061768655
BBH	reference tools	QfO:TreeFam-A	0.47064253	0.95808758	0.0070056387	0.0040129025
po5_clustering_using_diamond	proteinortho v5	QfO:TreeFam-A	0.43377118	0.95077264	0.0065829911	0.0042544805
OrthoFinder_MSA_v2.5.2	reference tools	QfO:TreeFam-A	0.67458079	0.92987913	0.0065760667	0.0042078554
Domainoid+	reference tools	QfO:TreeFam-A	0.65847905	0.92842166	0.0066559076	0.0042962814
PANTHER_16_all	reference tools	QfO:TreeFam-A	0.67527306	0.88107186	0.006572438	0.0051896918
OrthoInspector 3	reference tools	QfO:TreeFam-A	0.65978668	0.9416005	0.006649746	0.0039318515
OrthoMCL	reference tools	QfO:TreeFam-A	0.68222142	0.83722979	0.0065351057	0.0057398043
phylomedb_v5	reference tools	QfO:TreeFam-A	0.53343418	0.9436658	0.0070020387	0.0043041904
Hieranoid_2	reference tools	QfO:TreeFam-A	0.60337931	0.94098125	0.0068661062	0.004130555
OMA_Groups	reference tools	QfO:TreeFam-A	0.36792985	0.95437616	0.0067685054	0.0047169427
oneblast_bin1k_step2_diamond	oneblast_bin1k_step2_diamond	QfO:TreeFam-A	0.47510678	0.94825374	0.0066332754	0.0041568599
sonicparanoid	reference tools	QfO:TreeFam-A	0.63863392	0.9364966	0.0067425987	0.0041448264
RSD	reference tools	QfO:TreeFam-A	0.42864468	0.95624321	0.0069459154	0.0042881504
default_step2_po5	proteinortho v5	QfO:TreeFam-A	0.42720342	0.9501992	0.0065707433	0.0043093561
MetaPhOrs_v.2.5	reference tools	QfO:TreeFam-A	0.62153223	0.93695887	0.0068072846	0.0041882087
core_diamond_coreMaxProts10	core_diamond_coreMaxProts10	QfO:TreeFam-A	0.5091168	0.9421614	0.0066404075	0.0042181537
OMA_Pairs	reference tools	QfO:TreeFam-A	0.55343316	0.92062612	0.006977558	0.0048934724
PANTHER__16__LDO__only	reference tools	QfO:TreeFam-A	0.42223476	0.95950591	0.0069323475	0.0041705573
halfblast_step2_diamond	halfblast_step2_diamond	QfO:TreeFam-A	0.48332798	0.94930314	0.0066378185	0.0040838652
Ensembl_Compara	reference tools	QfO:TreeFam-A	0.62691657	0.80998443	0.0067879008	0.0062588425
OMA_GETHOGs	reference tools	QfO:TreeFam-A	0.55807394	0.91542247	0.0069702492	0.0050018519
SonicParanoid2	reference tools	QfO:TreeFam-A	0.66840162	0.91705069	0.0066077344	0.0045342829
conn0.00001_diamond-groups	conn0.00001_diamond	QfO:TreeFam-A	0.80547008	0.65864834	0.0052579306	0.0056954342
BBH	reference tools	QfO:G_STD2_Luca	1209	0.254756	67.321546	0.010364587
po5_clustering_using_diamond	proteinortho v5	QfO:G_STD2_Luca	422	0.23493568	40.093299	0.015886858
OrthoFinder_MSA_v2.5.2	reference tools	QfO:G_STD2_Luca	981	0.27785059	60.783793	0.011736611
Domainoid+	reference tools	QfO:G_STD2_Luca	1861	0.26759807	82.964593	0.0081293015
PANTHER_16_all	reference tools	QfO:G_STD2_Luca	1641	0.28928354	78.084353	0.0092894878
OrthoInspector 3	reference tools	QfO:G_STD2_Luca	1655	0.26266724	78.405378	0.0087574131
OrthoMCL	reference tools	QfO:G_STD2_Luca	2577	0.40789401	96.89978	0.0095966782
phylomedb_v5	reference tools	QfO:G_STD2_Luca	323	0.28748341	35.111551	0.021663724
Hieranoid_2	reference tools	QfO:G_STD2_Luca	866	0.26146486	57.176962	0.012164885
OMA_Groups	reference tools	QfO:G_STD2_Luca	186	0.24039939	26.68107	0.025617398
oneblast_bin1k_step2_diamond	oneblast_bin1k_step2_diamond	QfO:G_STD2_Luca	514	0.24041134	44.207281	0.015394193
sonicparanoid	reference tools	QfO:G_STD2_Luca	1223	0.24564887	67.700494	0.0096257254
RSD	reference tools	QfO:G_STD2_Luca	962	0.25883576	60.203949	0.011659096
default_step2_po5	proteinortho v5	QfO:G_STD2_Luca	446	0.2351057	41.207651	0.017213241
MetaPhOrs_v.2.5	reference tools	QfO:G_STD2_Luca	859	0.28139032	56.949465	0.012561406
core_diamond_coreMaxProts10	core_diamond_coreMaxProts10	QfO:G_STD2_Luca	988	0.24652979	60.995915	0.011258079
OMA_Pairs	reference tools	QfO:G_STD2_Luca	554	0.24780815	45.876633	0.01505626
PANTHER__16__LDO__only	reference tools	QfO:G_STD2_Luca	781	0.25955734	54.345424	0.012262541
halfblast_step2_diamond	halfblast_step2_diamond	QfO:G_STD2_Luca	504	0.24971655	43.77956	0.015498377
Ensembl_Compara	reference tools	QfO:G_STD2_Luca	2145	0.34212454	88.807241	0.0090060076
OMA_GETHOGs	reference tools	QfO:G_STD2_Luca	470	0.24285714	42.291605	0.01600684
SonicParanoid2	reference tools	QfO:G_STD2_Luca	2848	0.33060795	101.576	0.0080170016
conn0.00001_diamond-groups	conn0.00001_diamond	QfO:G_STD2_Luca	6279	0.75604762	145.23168	0.0092985369
BBH	reference tools	QfO:G_STD2_Eukaryota	3547	0.2322381	112.51451	0.0061581805
po5_clustering_using_diamond	proteinortho v5	QfO:G_STD2_Eukaryota	1681	0.21670774	78.9976	0.0083129419
OrthoFinder_MSA_v2.5.2	reference tools	QfO:G_STD2_Eukaryota	5653	0.249	138.78505	0.0064271947
Domainoid+	reference tools	QfO:G_STD2_Eukaryota	4751	0.23690476	128.51922	0.0062691728
PANTHER_16_all	reference tools	QfO:G_STD2_Eukaryota	5796	0.26433333	140.3027	0.0068964579
OrthoInspector 3	reference tools	QfO:G_STD2_Eukaryota	5005	0.23371429	131.53921	0.0060897474
OrthoMCL	reference tools	QfO:G_STD2_Eukaryota	6520	0.33985714	147.58412	0.0085262362
phylomedb_v5	reference tools	QfO:G_STD2_Eukaryota	2753	0.23153962	99.968067	0.0063750463
Hieranoid_2	reference tools	QfO:G_STD2_Eukaryota	3776	0.22847619	115.80327	0.0062059838
OMA_Groups	reference tools	QfO:G_STD2_Eukaryota	1017	0.20115185	61.866313	0.010071217
oneblast_bin1k_step2_diamond	oneblast_bin1k_step2_diamond	QfO:G_STD2_Eukaryota	2030	0.21773399	86.497578	0.0073154869
sonicparanoid	reference tools	QfO:G_STD2_Eukaryota	3908	0.22561905	117.64165	0.0060412998
RSD	reference tools	QfO:G_STD2_Eukaryota	2777	0.24147333	100.37737	0.0068095416
default_step2_po5	proteinortho v5	QfO:G_STD2_Eukaryota	1546	0.21594899	75.864855	0.0085778736
MetaPhOrs_v.2.5	reference tools	QfO:G_STD2_Eukaryota	4505	0.24385714	125.48745	0.0064749143
core_diamond_coreMaxProts10	core_diamond_coreMaxProts10	QfO:G_STD2_Eukaryota	2685	0.23378558	98.796745	0.0066186528
OMA_Pairs	reference tools	QfO:G_STD2_Eukaryota	2220	0.21615187	90.275651	0.0071005621
PANTHER__16__LDO__only	reference tools	QfO:G_STD2_Eukaryota	3475	0.23371429	111.45297	0.0062759299
halfblast_step2_diamond	halfblast_step2_diamond	QfO:G_STD2_Eukaryota	2163	0.22039495	89.162307	0.0071953222
Ensembl_Compara	reference tools	QfO:G_STD2_Eukaryota	6694	0.30090476	149.24093	0.0072630855
OMA_GETHOGs	reference tools	QfO:G_STD2_Eukaryota	2908	0.23408332	102.57507	0.0063403445
SonicParanoid2	reference tools	QfO:G_STD2_Eukaryota	5974	0.27633333	142.15374	0.0072275686
conn0.00001_diamond-groups	conn0.00001_diamond	QfO:G_STD2_Eukaryota	9876	0.70333333	174.48726	0.01082635
Proteinortho6_canonical_defaultclustering	proteinortho6	QfO:EC_agg	135864	0.96914656	0	0.00061635765
Proteinortho6_canonical_defaultclustering	proteinortho7	QfO:GO_agg	84953	0.48825362	0	0.0015709677
Proteinortho6_canonical_defaultclustering	proteinortho8	QfO:SwissTrees_agg	0.55633807	0.95155089	0.034213387	0.032822685
Proteinortho6_canonical_defaultclustering	proteinortho9	QfO:G_STD_Fungi_agg	9172	0.26211111	169.62199	0.012925118
Proteinortho6_canonical_defaultclustering	proteinortho10	QfO:G_STD2_Fungi_agg	6661	0.25058333	148.92933	0.0083185358
Proteinortho6_canonical_defaultclustering	proteinortho11	QfO:G_STD_Eukaryota_agg	2169	0.17540666	89.280287	0.010190107
Proteinortho6_canonical_defaultclustering	proteinortho12	QfO:G_STD2_Eukaryota_agg	2132	0.22185741	88.549744	0.0072408839
Proteinortho6_canonical_defaultclustering	proteinortho13	QfO:G_STD2_Luca_agg	565	0.24399494	46.324694	0.014188894
Proteinortho6_canonical_defaultclustering	proteinortho14	QfO:G_STD_Luca_agg	2359	0.31816837	92.923482	0.015668592
Proteinortho6_canonical_defaultclustering	proteinortho15	QfO:TreeFam-A_agg	0.47800028	0.94725585	0.0066350797	0.004179625
Proteinortho6_canonical_defaultclustering	proteinortho16	QfO:STD_Eukaryota_agg	7819	0.042034361	136.51504	0.0031880591
Proteinortho6_canonical_defaultclustering	proteinortho17	QfO:STD_Bacteria_agg	782	0.53804348	52.613175	0.020532634
Proteinortho6_canonical_defaultclustering	proteinortho18	QfO:STD_Fungi_agg	6263	0.29738145	142.51907	0.0067677422
core_diamond_coreMaxProts10_c64_r1.proteinortho-graph.txt	participant_id	QfO:G_STD2_Vertebrata_agg	17127	0.23457143	207.9847	0.0059102425
default_step2_po5_c64_r1.proteinortho-graph.txt	participant_id	QfO:G_STD2_Vertebrata_agg	11517	0.23690476	184.5335	0.0061978233
oneblast_bin1k_step2_diamond_c64_r1.proteinortho-graph.txt	participant_id	QfO:G_STD2_Vertebrata_agg	15277	0.23019048	201.88253	0.0061356165
halfblast_step2_diamond_c64_r1.proteinortho-graph.txt	participant_id	QfO:G_STD2_Vertebrata_agg	15806	0.22866667	203.77787	0.0056384655
conn0.1_diamond_c64_r1.proteinortho-graph.txt	participant_id	QfO:G_STD2_Vertebrata_agg	15471	0.234	202.59199	0.0060324513
po5_clustering_using_diamond.proteinortho-graph.txt	participant_id	QfO:G_STD2_Vertebrata_agg	12936	0.23409524	191.93192	0.0060262656
core_diamond_coreMaxProts10_c64_r1.proteinortho-graph.txt	participant_id	QfO:VGNC_agg	0.9437620122002173	0.9807224730809309	0.0029187342930459886	0.001775779213997184
default_step2_po5_c64_r1.proteinortho-graph.txt	participant_id	QfO:VGNC_agg	0.9117155510988552	0.9826180933939749	0.003594348760339054	0.0017189063243933716
oneblast_bin1k_step2_diamond_c64_r1.proteinortho-graph.txt	participant_id	QfO:VGNC_agg	0.9296816244672851	0.9803498259681896	0.0032392910133605185	0.0018056999295398288
halfblast_step2_diamond_c64_r1.proteinortho-graph.txt	participant_id	QfO:VGNC_agg	0.9301830032589622	0.9806193014139101	0.00322859232046084	0.0017932852609927124
conn0.1_diamond_c64_r1.proteinortho-graph.txt	participant_id	QfO:VGNC_agg	0.9237486420991059	0.980617404417635	0.003362398053293712	0.0017996045630596206
po5_clustering_using_diamond.proteinortho-graph.txt	participant_id	QfO:VGNC_agg	0.9082058995571154	0.9801596248365424	0.0036580359769157783	0.0018353885479882863
phylomedb_v5	tool_id	QfO:VGNC	0.946185343026657	0.996172964412968	0.00285882008293992	0.00080265020555591
phylomedb_v5	tool_id	QfO:G_STD2_Vertebrata	21458	0.24409524	216.92414	0.0054125974
SonicParanoid2-g	tool_id	QfO:G_STD2_Vertebrata	21557	0.24261905	217.04657	0.00562018
SonicParanoid2-g	tool_id	QfO:VGNC	0.969039859613938	0.996562540282731	0.00219442483312396	0.000751970796324537
InParanoid_Xenfix	tool_id	QfO:G_STD2_Vertebrata	19514	0.23795238	213.79347	0.00546095
InParanoid_Xenfix	tool_id	QfO:VGNC	0.957299239575499	0.997692140213368	0.00256147481132994	0.000620620092690154
OMA_GETHOGs	tool_id	QfO:VGNC	0.948399766023231	0.973120123467375	0.00280265720758936	0.00207554807530398
OMA_GETHOGs	tool_id	QfO:G_STD2_Vertebrata	17690	0.24319048	209.55762	0.0057514644
sonicparanoid-sens	tool_id	QfO:G_STD2_Vertebrata	22079	0.2447619	217.63375	0.0056011202
sonicparanoid-sens	tool_id	QfO:VGNC	0.971922787666082	0.996359275281621	0.00209286542604145	0.000772578174274093
SonicParanoid2-fast	tool_id	QfO:G_STD2_Vertebrata	24598	0.26980952	219.10633	0.0064865955
SonicParanoid2-fast	tool_id	QfO:VGNC	0.971504972006351	0.994823086467291	0.00210792660741605	0.00092004109260191
BBH	tool_id	QfO:VGNC	0.971964569232055	0.999570317535341	0.00209135260543494	0.000266262728101403
BBH	tool_id	QfO:G_STD2_Vertebrata	21809	0.24361905	217.34226	0.0058135471
sonicparanoid-mostsensitive	tool_id	QfO:G_STD2_Vertebrata	22040	0.24471429	217.59326	0.0056741532
sonicparanoid-mostsensitive	tool_id	QfO:VGNC	0.971922787666082	0.996359275281621	0.00209286542604145	0.000772578174274093
PANTHER__16__LDO__only	tool_id	QfO:VGNC	0.921826690064344	0.998687307622669	0.00340096621392146	0.000477457589331593
PANTHER__16__LDO__only	tool_id	QfO:G_STD2_Vertebrata	18764	0.247	212.20787	0.005930253
OrthoMCL	tool_id	QfO:VGNC	0.982785994819086	0.475076749070932	0.00164785453732388	0.00439876366898452
OrthoMCL	tool_id	QfO:G_STD2_Vertebrata	30221	0.46066667	214.3027	0.011204073
SonicParanoid2-fast-g	tool_id	QfO:VGNC	0.968830951784073	0.996561801615953	0.00220157862939087	0.000752132106627257
SonicParanoid2-fast-g	tool_id	QfO:G_STD2_Vertebrata	21616	0.24309524	217.11785	0.0056124162
OMA_Groups	tool_id	QfO:G_STD2_Vertebrata	14238	0.23280952	197.79097	0.0055054
OMA_Groups	tool_id	QfO:VGNC	0.914097100359321	0.998311658681269	0.00355016473328077	0.000543561301576092
MetaPhOrs_v.2.5	tool_id	QfO:VGNC	0.966867218183338	0.99496947286955	0.00226757048825474	0.000909246240688033
MetaPhOrs_v.2.5	tool_id	QfO:G_STD2_Vertebrata	26734	0.24866667	218.60692	0.0056296737
SonicParanoid2	tool_id	QfO:G_STD2_Vertebrata	24461	0.26695238	219.08373	0.0064430514
SonicParanoid2	tool_id	QfO:VGNC	0.971546753572324	0.994823307949003	0.00210642593389099	0.000920001833283194
OMA_Pairs	tool_id	QfO:G_STD2_Vertebrata	18836	0.24442857	212.36943	0.0057174399
OMA_Pairs	tool_id	QfO:VGNC	0.949820339266316	0.975497768623412	0.00276587800679839	0.0019849830106645
OrthoFinder_MSA_v2.5.2	tool_id	QfO:VGNC	0.980362663992646	0.994827440006784	0.00175785518885474	0.000915494143393607
OrthoFinder_MSA_v2.5.2	tool_id	QfO:G_STD2_Vertebrata	28102	0.24959261	217.44124	0.0066559313
sonicparanoid	tool_id	QfO:VGNC	0.971922787666082	0.996359275281621	0.00209286542604145	0.000772578174274093
sonicparanoid	tool_id	QfO:G_STD2_Vertebrata	21730	0.24066667	217.25203	0.0056663107
SonicParanoid2-sens-g	tool_id	QfO:VGNC	0.972006350798028	0.996359587134353	0.00208983855563097	0.000772512118615671
SonicParanoid2-sens-g	tool_id	QfO:G_STD2_Vertebrata	22125	0.2417619	217.68081	0.005722461
Hieranoid_2	tool_id	QfO:G_STD2_Vertebrata	19624	0.241	214.00806	0.0055899193
Hieranoid_2	tool_id	QfO:VGNC	0.954834127183087	0.997250829115029	0.00263098031138577	0.00067793762180895
sonicparanoid-fast	tool_id	QfO:VGNC	0.971588535138297	0.996358027336218	0.00210492405736808	0.000772842509911037
sonicparanoid-fast	tool_id	QfO:G_STD2_Vertebrata	21541	0.24219048	217.02703	0.0056861605
Domainoid+	tool_id	QfO:G_STD2_Vertebrata	24253	0.25052381	219.03682	0.0056887863
Domainoid+	tool_id	QfO:VGNC	0.979610595805131	0.994781280495566	0.00179051281073399	0.000919880203874029
OrthoInspector 3	tool_id	QfO:VGNC	0.971588535138297	0.995888650963597	0.00210492405736808	0.000820748683130353
OrthoInspector 3	tool_id	QfO:G_STD2_Vertebrata	21910	0.24485714	217.45436	0.0056716313
PANTHER_16_all	tool_id	QfO:G_STD2_Vertebrata	23133	0.25871429	218.52274	0.0061306557
PANTHER_16_all	tool_id	QfO:VGNC	0.93515500960976	0.992946186948228	0.00311981215283739	0.00109255752028788
SonicParanoid2-sens	tool_id	QfO:VGNC	0.974346118492521	0.994583528809656	0.00200300300078964	0.000939488091850571
SonicParanoid2-sens	tool_id	QfO:G_STD2_Vertebrata	25228	0.2677619	219.12555	0.0062767022
OEBT0020000002	tool_id	QfO:G_STD2_Vertebrata	22125	0.2417619	217.68081	0.005722461
OEBT0020000002	tool_id	QfO:VGNC	0.972006350798028	0.996359587134353	0.00208983855563097	0.000772512118615671
RSD	tool_id	QfO:G_STD2_Vertebrata	19787	0.25685714	214.31767	0.0060704387
RSD	tool_id	QfO:VGNC	0.960474638589454	0.998306336040301	0.0024684782431006	0.000531108103304433
Ensembl_Compara	tool_id	QfO:G_STD2_Vertebrata	22627	0.26247619	218.14525	0.0060984098
Ensembl_Compara	tool_id	QfO:VGNC	0.915392328904487	0.98871790243242	0.00352579398699755	0.00139063167458982

## Sheet: full bacterial uniprot proteino
input are all 8623 bacteria proteomes available in the Uniprot release 2022\_03 (all entries of table 'shuffled bac_n 2022_03')
HPC system using 64 core AMD_EPYC_Processor as nodes
step=2 (all-versus-all blast) using diamond in classical modus (classical reciprocal best hit algorithm). Distributed in 10k jobs using 4 threads and 1GB memory.	proteinortho6.pl -p=diamond -cpus=4 -nosummaryhtml -halfblast -step=2 -subparaBlast=\"--ignore-warnings\" -job=$j/10000 FASTAFILES			prepare files for the clustering using -prepare. Single core job using 500GB memory	zcat ../uniprot_verylarge/*gz | awk -F'\t' '$1~/^#/ || ($3<1e-30 && $5<1e-30){print $0}' | ../../../bin/proteinortho_v6/src/BUILD/Linux_x86_64/proteinortho_clustering -prepare 100 -maxnodes 20000 -minnodes 100 -debug 2 -cpus 8 -			step=3 clustering with core modus. 100 jobs using 64 threads and 100 GB memory	proteinortho6.pl -nosummaryhtml -cpus=32 -step=3 -subparaCluster=\"-abc -lapack 0 -core -weighted 0 -maxnodes 15000\" *$i*blast-graph.gz
file	runtime (sec)	memory (peak RSS KB)		command	runtime (sec)	memory (peak RSS KB)		file	runtime (sec)	memory (peak RSS KB)		file = the job fraction (for step=2 there are 10k jobs and for step=3 there are 100)
uni_6907	1748.52	220148		expr `stat -c %Y prepare.err` - `stat -c %Y make_split.sh`	173141	NA		step3_uni_32	1672.05	18650204
uni_8812	2002.99	227808						step3_uni_45	2815.64	27596768
uni_8448	1587.94	222652						step3_uni_38	3015.71	30714492
uni_6893	1577.06	218704						step3_uni_77	1894.84	17058664
uni_8986	1982.18	240672						step3_uni_99	6407.49	37257512
uni_4269	2283.51	256988						step3_uni_93	1828.85	14150056
uni_2718	2392.51	266880						step3_uni_3	2282.77	24471080
uni_8865	1864.27	214628						step3_uni_9	2035.81	24451876
uni_6970	1831.69	229840						step3_uni_21	2649.32	24713184
uni_8545	1857.90	230340						step3_uni_56	11020.14	74106632
uni_6450	2788.89	249420						step3_uni_80	1674.78	14409228
uni_4364	1450.77	226748						step3_uni_19	12986.47	57717128
uni_2662	1571.97	232032						step3_uni_64	3014.60	26244840
uni_8968	2332.11	264464						step3_uni_13	2139.84	23159000
uni_4287	1725.91	223504						step3_uni_69	749.96	6321672
uni_2615	1850.56	223328						step3_uni_87	1389.95	13726696
uni_4313	1428.93	224792						step3_uni_14	3691.69	39716476
uni_2781	1860.32	230672						step3_uni_63	5250.59	48220396
uni_6427	1632.36	221172						step3_uni_51	2014.57	12533264
uni_8532	1900.60	234804						step3_uni_26	914.46	7834928
uni_5498	2176.55	227768						step3_uni_4	2399.64	17114156
uni_5956	1840.10	213476						step3_uni_70	8235.31	31948464
uni_7238	1895.94	229172						step3_uni_94	2575.54	20923212
uni_950	2437.37	239396						step3_uni_42	675.98	6694004
uni_927	1618.25	234780						step3_uni_35	3163.05	38108944
uni_5921	1672.52	248724						step3_uni_48	2856.15	25763148
uni_1749	1791.13	242132						step3_uni_46	2005.64	23109276
uni_593	1255.21	217412						step3_uni_31	2358.16	28792132
uni_5401	2405.71	269812						step3_uni_90	2383.30	29607164
uni_3093	1838.05	224532						step3_uni_74	751.86	6598320
uni_7335	1483.64	221732						step3_uni_55	1748.09	19910648
uni_9220	1610.96	245928						step3_uni_22	3802.01	30034196
uni_407	1838.58	273048						step3_uni_28	1902.73	20916744
uni_1633	1516.53	217952						step3_uni_89	11181.20	48236116
uni_5595	1437.11	218780						step3_uni_10	694.54	5892236
uni_3107	2257.23	264992						step3_uni_67	2439.79	30519640
uni_3170	2208.35	247304						step3_uni_83	1848.54	17520908
uni_470	1880.97	239272						step3_uni_60	3475.97	35431528
uni_1644	2154.95	253872						step3_uni_17	3576.82	27658160
uni_9257	1722.93	256412						step3_uni_84	1344.40	13206744
uni_7342	2027.39	233212						step3_uni_25	2271.58	21902652
uni_5476	1848.55	220324						step3_uni_52	1324.97	12176996
uni_8078	1741.65	229848						step3_uni_58	3376.98	43728316
uni_4659	1907.26	219888						step3_uni_97	3267.32	29235536
uni_19	2350.13	269920						step3_uni_79	1960.90	15849952
uni_2328	2025.92	244916						step3_uni_73	4822.15	37783408
uni_2252	1663.82	229816						step3_uni_7	2463.72	22837820
uni_8175	1415.02	222492						step3_uni_36	12994.74	55607328
uni_4754	1127.54	214908						step3_uni_41	5557.09	51154200
uni_80	1678.89	224304						step3_uni_5	2040.80	27266424
uni_6060	1640.03	222424						step3_uni_95	4290.37	27405352
uni_6017	1980.82	232456						step3_uni_71	3581.34	32641568
uni_4723	1533.52	214032						step3_uni_49	3834.96	32164676
uni_8102	1877.06	233748						step3_uni_34	1775.12	16622556
uni_2225	1681.68	254988						step3_uni_43	3392.21	33588996
uni_6183	2411.80	233900						step3_uni_62	1928.12	18480892
uni_8096	1679.44	241372						step3_uni_15	4470.57	31549124
uni_7608	1825.67	224760						step3_uni_68	1900.94	19706976
uni_3860	1670.89	214888						step3_uni_86	2963.29	32656388
uni_9689	1438.89	224040						step3_uni_27	2503.90	25692752
uni_3983	1759.93	230608						step3_uni_50	2476.35	29452020
uni_1379	1908.77	250896						step3_uni_100	0.11	16824
uni_3817	1680.09	219320						step3_uni_57	2231.26	21967156
uni_3537	1818.94	229112						step3_uni_20	3770.25	27025220
uni_7691	1819.36	249424						step3_uni_12	2219.76	18758984
uni_1203	1789.87	218184						step3_uni_65	8881.33	54474316
uni_9784	1370.71	217488						step3_uni_81	1624.99	16487324
uni_7705	1767.90	220768						step3_uni_18	1663.18	17395592
uni_1397	1504.05	219932						step3_uni_39	1344.58	12297556
uni_5031	2071.25	224240						step3_uni_44	3925.50	32140288
uni_9610	2280.21	235272						step3_uni_33	5235.19	34034840
uni_9667	1801.84	222776						step3_uni_92	3211.81	33962832
uni_5046	1545.40	216284						step3_uni_76	960.97	8976400
uni_7772	1576.90	232196						step3_uni_98	2148.58	20490864
uni_1274	1747.72	216868						step3_uni_8	2560.31	29671464
uni_3540	1207.39	216772						step3_uni_2	2143.99	20383344
uni_2322	1997.48	230340						step3_uni_72	3847.99	38839812
uni_6084	1816.74	238780						step3_uni_96	4202.78	39630728
uni_64	1931.49	230900						step3_uni_78	2792.64	33485292
uni_8191	1750.47	227332						step3_uni_6	2146.14	23250132
uni_6110	1581.27	217908						step3_uni_40	5703.40	43768788
uni_4624	2315.56	268112						step3_uni_37	1375.19	12798232
uni_8005	1499.87	215552						step3_uni_85	795.91	6539888
uni_8072	1650.81	221032						step3_uni_16	1933.23	21813864
uni_7	1984.25	216088						step3_uni_61	3394.07	25503356
uni_4653	1833.94	244368						step3_uni_59	3399.60	25985360
uni_6167	2021.77	243480						step3_uni_53	3053.13	38831948
uni_13	1153.77	207596						step3_uni_24	3483.84	39547648
uni_2355	1810.83	223140						step3_uni_29	1796.13	23565272
uni_4729	1677.98	240328						step3_uni_23	1147.33	12251836
uni_8108	1862.49	220924						step3_uni_54	1214.31	10411984
uni_6189	1905.27	218724						step3_uni_82	2417.95	23920288
uni_2258	1496.07	223188						step3_uni_88	2110.82	21261892
uni_3989	1958.84	232296						step3_uni_66	2155.10	26126852
uni_147	1803.29	219228						step3_uni_11	5705.24	45040676
uni_1373	2334.67	273572						step3_uni_30	6427.07	34987396
uni_3447	1756.57	246956						step3_uni_47	5616.40	35848240
uni_9760	1455.49	230016						step3_uni_1	6198.32	40535880
uni_5141	2758.25	277236						step3_uni_75	1998.12	17484576
uni_7675	1833.44	242872						step3_uni_91	1940.28	19354844
uni_7602	2134.33	235784
uni_1290	1866.08	220560
uni_5136	1675.83	217552
uni_9717	1812.17	232516
uni_3430	1599.05	232564
uni_7796	1844.37	223548
uni_130	1619.11	232184
uni_1304	1197.34	214636
uni_9683	1396.29	233576
uni_3910	1804.92	246612
uni_7778	1642.87	221524
uni_3884	2121.87	240464
uni_1209	2452.57	266788
uni_3967	2218.99	273200
uni_4214	1459.49	219828
uni_2686	2133.67	256424
uni_6520	1702.05	218808
uni_8435	1923.80	231364
uni_4380	1660.09	216144
uni_2712	1553.71	216376
uni_2765	1818.77	225276
uni_8818	1975.62	232244
uni_6899	1846.21	254480
uni_8442	1823.62	250804
uni_6557	2110.35	244060
uni_4263	1590.07	214544
uni_8962	1627.44	242464
uni_6877	1711.81	221408
uni_4319	1888.41	260676
uni_8538	1743.87	233840
uni_6994	1452.35	219708
uni_8881	1708.39	260644
uni_6800	1668.42	222868
uni_8915	1656.49	229904
uni_2668	1438.83	211952
uni_9350	1820.06	242332
uni_7245	1626.45	233116
uni_5571	1325.70	219512
uni_3077	1375.99	213324
uni_577	1660.50	217876
uni_1743	1709.71	222440
uni_500	1692.58	226464
uni_1734	1699.84	233660
uni_5492	1579.49	216900
uni_3000	1826.61	231196
uni_494	1181.84	210024
uni_5506	1988.45	240048
uni_3194	1493.84	215412
uni_7232	1973.32	231456
uni_9327	1808.79	251168
uni_5826	1498.26	218412
uni_820	1873.61	221408
uni_7348	1686.10	232260
uni_3099	1752.00	233672
uni_599	1532.14	229224
uni_857	2018.41	229652
uni_1639	1771.37	224040
uni_5851	1769.82	224084
uni_233	1741.90	218280
uni_1007	1492.52	218004
uni_7495	2116.39	263412
uni_3733	1818.30	256144
uni_9580	1429.57	258500
uni_5235	1844.32	253512
uni_1193	2362.92	235488
uni_7501	1881.70	225824
uni_9414	1545.74	253660
uni_9463	1431.59	229636
uni_7576	1903.72	252984
uni_5242	1418.10	236604
uni_3744	1873.02	226092
uni_9839	1690.17	227536
uni_244	1835.49	223728
uni_1070	1915.69	270760
uni_5338	2097.98	233356
uni_9519	1709.80	230028
uni_7598	1615.94	214268
uni_9943	1857.96	247648
uni_7856	1624.20	218812
uni_7821	1266.64	218860
uni_9934	2298.29	264916
uni_349	1589.74	218152
uni_3649	1600.21	213552
uni_2056	1981.80	250008
uni_8371	1183.24	217724
uni_6264	1456.93	217500
uni_4550	1471.51	215160
uni_4527	1565.41	223580
uni_6213	2046.22	218788
uni_8306	1989.19	265784
uni_6387	1428.91	215740
uni_2021	1560.10	222368
uni_8292	1610.42	219624
uni_4993	1760.71	247588
uni_6369	1456.46	243580
uni_4807	1348.33	216052
uni_4870	1786.18	231008
uni_7131	1344.70	223036
uni_3297	1545.26	222452
uni_5605	1925.52	235568
uni_797	1519.78	212548
uni_9024	1890.73	228872
uni_3303	1768.29	225432
uni_5791	2150.49	261112
uni_603	1789.73	231212
uni_1437	2010.79	247800
uni_674	1506.05	217880
uni_1440	2107.95	245012
uni_3374	1869.31	235060
uni_9053	1597.58	240524
uni_5672	1441.42	236320
uni_7146	2402.05	276260
uni_5708	1921.44	244420
uni_1960	1420.57	217040
uni_9129	1628.13	220076
uni_1917	1716.24	235160
uni_1883	1751.85	229912
uni_3279	1713.56	219592
uni_779	1463.76	215232
uni_8741	1615.25	234404
uni_4160	1299.72	218936
uni_6654	1816.22	251328
uni_2466	1829.42	271856
uni_2411	1703.63	217748
uni_4083	2078.93	222312
uni_6623	1646.22	216992
uni_2585	2482.33	267592
uni_4117	1760.91	223840
uni_8736	2171.19	262760
uni_2931	2362.08	238424
uni_6759	1611.93	217004
uni_2488	1940.82	232172
uni_2946	2172.08	246540
uni_1984	2197.95	257596
uni_9059	1553.40	223660
uni_1810	1643.26	223436
uni_5678	1687.80	226140
uni_1867	2103.71	257844
uni_609	1349.87	215692
uni_3309	1782.31	228304
uni_9154	1573.29	245788
uni_5775	2141.27	273180
uni_7041	1708.94	218036
uni_1889	1629.24	222540
uni_773	1524.85	212652
uni_1547	1522.73	217244
uni_3273	1764.12	226880
uni_3204	1711.00	220160
uni_5696	1312.80	216136
uni_704	1895.89	234604
uni_1530	2493.49	252276
uni_7036	2029.98	247948
uni_3390	1328.28	209480
uni_5702	1787.79	229824
uni_690	2114.59	259680
uni_9123	1788.31	225376
uni_4089	1894.13	238164
uni_6629	1579.06	215328
uni_2841	1920.99	222180
uni_2836	1838.29	233344
uni_6724	1631.14	218892
uni_2482	1684.35	224856
uni_4010	1869.07	228264
uni_8631	2037.99	227252
uni_2516	1438.90	216224
uni_4184	1807.84	221840
uni_2561	1511.18	222808
uni_8646	1740.87	222732
uni_4067	1657.95	220960
uni_6753	2595.77	249276
uni_9469	1355.72	228256
uni_5248	2058.28	242180
uni_7926	1516.64	214020
uni_9833	2068.56	258400
uni_3739	1738.86	220708
uni_239	1976.41	232380
uni_9844	1360.78	224508
uni_7951	1836.16	224292
uni_1199	1657.91	223796
uni_3643	2488.27	234836
uni_343	1765.37	250640
uni_1177	1971.73	273368
uni_9564	1711.96	230536
uni_7471	2265.01	233608
uni_5345	1692.75	228468
uni_5332	1171.16	229008
uni_1094	1980.42	267456
uni_7406	1731.29	221340
uni_9513	1939.52	231480
uni_334	2048.78	217208
uni_1100	1462.13	212184
uni_9949	1469.03	252748
uni_7592	1665.29	220024
uni_3634	1547.64	215264
uni_9487	1552.76	244484
uni_6219	1942.45	217728
uni_4977	1353.35	218948
uni_8298	1565.88	235824
uni_4900	1649.06	225896
uni_4894	1425.22	224492
uni_6280	1297.28	231408
uni_2126	1960.13	228364
uni_8395	1733.07	223180
uni_4420	1562.84	218552
uni_6314	2737.21	249372
uni_8201	1898.22	244792
uni_4999	1573.73	265184
uni_8276	2724.25	266940
uni_6363	1758.96	225216
uni_4457	1552.54	221164
uni_2151	1777.90	240836
uni_5179	1871.90	227532
uni_9758	1338.22	223552
uni_3825	1817.75	223156
uni_3408	1835.77	224364
uni_108	1074.75	208064
uni_3852	1308.50	225512
uni_3572	1586.95	221184
uni_1246	1625.81	217524
uni_7740	1248.43	210548
uni_5074	1704.52	222072
uni_3928	1832.81	222128
uni_9655	1342.60	232504
uni_9622	1536.95	260056
uni_5003	2262.45	230256
uni_191	1466.61	214904
uni_7737	1733.08	218484
uni_3491	1193.69	210176
uni_5197	1687.65	229076
uni_1231	1565.20	231324
uni_3505	1790.84	227792
uni_6128	1674.52	225100
uni_4788	1683.41	215216
uni_4685	1666.84	225548
uni_2217	1558.58	213956
uni_8130	1409.27	215364
uni_4711	2378.26	256232
uni_6025	2182.33	242468
uni_2383	1670.58	231868
uni_6052	1680.16	254188
uni_4766	1620.75	231476
uni_8147	2905.96	283680
uni_2260	1502.38	214300
uni_5913	2206.44	238996
uni_881	1312.73	209948
uni_5549	1930.96	234232
uni_5887	1947.58	224392
uni_915	1722.24	225304
uni_9368	1526.39	221784
uni_962	1881.47	256932
uni_1698	1583.85	215988
uni_5964	1361.16	213304
uni_538	2047.64	235844
uni_3038	2024.95	230700
uni_5444	1639.70	261180
uni_7370	1862.98	232168
uni_818	1773.67	235612
uni_9265	1548.10	219496
uni_1676	1513.93	211148
uni_442	1498.26	216672
uni_3142	1480.14	218836
uni_5869	1679.32	217980
uni_9386	1875.96	231852
uni_7293	1478.87	218320
uni_3135	2054.32	274200
uni_1601	1894.70	256184
uni_435	1403.86	216932
uni_9212	1805.41	223292
uni_7307	1521.34	215384
uni_5433	1781.06	253072
uni_1795	1498.00	227388
uni_8599	2275.25	262764
uni_6942	1773.53	225288
uni_8857	2128.91	277528
uni_6518	1970.29	254544
uni_8820	1755.62	221180
uni_6935	1812.03	233864
uni_8500	2690.23	246140
uni_6415	2128.77	229416
uni_4321	1553.45	222964
uni_8494	2020.54	235296
uni_6581	1753.42	239664
uni_2627	1669.53	215600
uni_2650	1775.28	221756
uni_6838	1616.21	239324
uni_4356	1914.98	241988
uni_6462	1634.23	230876
uni_8577	1960.23	237676
uni_9315	1604.90	237392
uni_968	1902.75	255732
uni_7200	1318.55	212116
uni_5534	1195.03	210232
uni_1692	1590.66	224272
uni_9281	2555.02	239764
uni_7394	1738.35	235444
uni_3032	2595.18	292712
uni_1706	1384.46	213000
uni_532	1516.07	217624
uni_1771	1705.63	218812
uni_545	1811.37	225512
uni_3045	1191.31	225700
uni_5919	1859.66	214796
uni_5543	1728.21	229920
uni_7277	1756.07	245136
uni_9362	1830.85	237200
uni_5863	1665.83	266604
uni_7299	1824.71	216836
uni_9218	2099.71	250920
uni_865	2026.87	264452
uni_5439	1362.22	214600
uni_5980	1637.82	223308
uni_812	2087.76	252648
uni_3148	1918.18	236548
uni_448	1564.67	223888
uni_5814	1640.43	215892
uni_986	1661.32	227908
uni_4251	1590.46	232760
uni_6565	2348.32	229460
uni_8470	2282.97	238980
uni_2757	1833.86	227528
uni_6948	1477.02	251472
uni_8593	1411.70	252808
uni_6486	1984.68	230248
uni_2720	1632.06	223192
uni_8407	1640.56	226460
uni_6512	1860.10	216776
uni_4226	2059.39	265824
uni_8927	2060.90	229020
uni_6832	2379.13	275328
uni_6468	2120.56	263188
uni_6845	2333.79	247680
uni_8950	2506.92	261012
uni_5090	1825.59	221608
uni_1336	2267.58	266524
uni_102	1897.29	244776
uni_3402	1593.43	223348
uni_9725	1971.47	221812
uni_3858	1897.84	224308
uni_5104	1586.60	227812
uni_7630	1459.39	256848
uni_3596	1505.63	224216
uni_7647	1839.64	224232
uni_5173	2091.33	245408
uni_9752	1747.24	257776
uni_3475	2059.82	267264
uni_1341	1432.64	209652
uni_175	1843.48	227148
uni_3955	1203.52	231760
uni_9628	1788.56	233396
uni_5009	2002.89	263716
uni_3578	1832.71	227744
uni_3922	1567.54	219116
uni_2367	1512.99	222256
uni_21	2022.88	222080
uni_6155	1279.78	208220
uni_4661	1680.46	236532
uni_8040	2267.68	228528
uni_8037	1561.56	219008
uni_4616	1681.15	229116
uni_6122	1688.81	222700
uni_2284	1659.35	216660
uni_4782	1416.00	217304
uni_56	1702.15	268220
uni_2310	1913.92	232664
uni_6058	1307.73	221480
uni_2389	1548.29	215340
uni_8704	1346.06	209528
uni_2879	1480.85	220656
uni_4125	1957.65	238588
uni_6611	2247.09	272212
uni_8690	1757.04	216796
uni_2423	1457.03	217624
uni_6785	1475.44	218120
uni_2454	1525.60	223460
uni_6666	2202.47	225968
uni_4152	1989.12	243384
uni_8773	1312.80	216836
uni_6688	1292.51	214304
uni_2974	2138.52	224760
uni_8609	1637.21	232500
uni_4028	2698.70	224316
uni_2903	1552.67	223380
uni_2559	2018.76	228016
uni_2897	1644.07	217676
uni_7174	2130.95	257436
uni_5640	1225.43	210636
uni_9061	1716.10	226612
uni_1828	1769.50	215932
uni_3346	1571.84	213576
uni_1472	1834.12	231088
uni_646	1425.88	219392
uni_9182	1417.71	220172
uni_1405	1986.56	223904
uni_631	1517.14	216860
uni_3331	1672.51	221760
uni_7097	1929.73	244532
uni_9016	1608.05	218044
uni_1591	1842.18	219448
uni_5637	1923.03	224000
uni_7103	1342.77	209592
uni_7079	1671.51	217188
uni_1925	1350.29	219128
uni_1952	1634.27	221644
uni_1508	1347.31	212192
uni_2013	1764.57	225336
uni_4481	1344.75	207832
uni_8334	1522.72	223564
uni_2187	1324.24	213924
uni_6221	2027.05	254748
uni_4515	1776.71	241772
uni_4562	2136.80	264188
uni_6256	2059.35	219152
uni_8343	1809.40	235040
uni_2064	1508.50	238860
uni_4938	1649.85	217184
uni_8239	1717.29	221044
uni_4418	1676.09	235448
uni_4842	1572.31	215840
uni_2169	2302.45	282248
uni_4835	1952.34	265396
uni_1042	1805.65	231228
uni_276	1668.24	221508
uni_3776	2303.76	240360
uni_5270	1454.91	214484
uni_7544	1754.68	217836
uni_9451	1449.41	217172
uni_9426	2172.17	231516
uni_3695	1811.45	237480
uni_7533	1687.16	226920
uni_395	1343.83	218928
uni_5207	1484.30	211640
uni_7969	1340.00	223448
uni_3701	2221.55	253748
uni_1035	2153.64	257776
uni_201	1731.59	222992
uni_5393	1233.36	215636
uni_7449	1498.13	215216
uni_9892	1773.36	257152
uni_7987	2152.85	268292
uni_9906	2026.95	226668
uni_7813	1764.95	227188
uni_7864	1688.98	230752
uni_1138	2146.83	250260
uni_9971	1817.62	261504
uni_298	1532.26	219496
uni_3798	1792.03	229948
uni_4568	1695.01	226436
uni_8349	1444.07	220324
uni_4932	1462.75	214236
uni_4945	2255.57	230136
uni_2019	1947.86	282700
uni_2163	2220.62	248072
uni_4465	1692.13	230156
uni_6351	2159.69	242952
uni_8244	1944.66	241952
uni_8233	1287.54	224280
uni_2080	1536.37	216708
uni_6326	1685.46	260580
uni_4412	1747.67	225744
uni_4848	1723.16	214520
uni_2114	1288.67	224264
uni_4586	1814.99	222400
uni_7539	1438.15	222472
uni_7963	1491.64	246692
uni_9876	1688.54	240940
uni_5399	1914.11	258092
uni_9801	1549.05	214284
uni_1048	1687.20	219640
uni_7914	1841.87	219524
uni_9995	1776.81	255212
uni_7880	2006.00	223736
uni_3606	1634.77	218452
uni_1132	1666.26	220292
uni_306	2104.02	238296
uni_5294	1967.25	233428
uni_9521	1242.06	219572
uni_3792	1462.47	217340
uni_7434	1953.17	247320
uni_292	1485.99	208124
uni_5300	1691.68	215944
uni_9898	1789.19	236352
uni_5377	1537.17	232396
uni_7443	1709.96	244172
uni_9556	1549.24	220072
uni_1145	1535.37	214456
uni_371	1732.81	224400
uni_3671	1829.73	225192
uni_7819	1724.67	236572
uni_2990	1829.27	229844
uni_4158	1863.57	225388
uni_8779	1551.64	226856
uni_2804	1566.72	218520
uni_2873	1539.44	228052
uni_2429	1604.04	220108
uni_6761	1769.53	216828
uni_4055	1678.53	218520
uni_2909	1584.80	215860
uni_8674	1884.79	226760
uni_2553	1725.72	230784
uni_8797	1393.38	216680
uni_2524	1467.90	216452
uni_6682	1999.13	244928
uni_8603	1538.71	235884
uni_4022	1461.83	221924
uni_6716	1644.91	224884
uni_9188	1963.29	274036
uni_1855	1805.31	221232
uni_7109	1408.82	215392
uni_1822	1950.04	231108
uni_1478	1961.90	268516
uni_1958	1552.00	216728
uni_9111	1319.23	219816
uni_1496	1939.59	233196
uni_5730	3036.99	274856
uni_7004	1849.99	222484
uni_9085	1681.68	223424
uni_1502	1810.37	230540
uni_736	1840.13	231644
uni_3236	1636.80	221844
uni_7190	1816.62	221388
uni_3241	1713.14	224508
uni_1575	1376.32	211680
uni_741	2115.64	250844
uni_7073	1666.61	227612
uni_5747	1850.03	237004
uni_9166	1735.88	250440
uni_8971	1591.79	222012
uni_6864	1901.56	233508
uni_2798	1615.82	216700
uni_6987	2506.24	276956
uni_8892	1844.67	235176
uni_6449	1668.71	233276
uni_6813	1823.16	231052
uni_8906	1916.71	228260
uni_4207	1820.49	225936
uni_6533	1522.74	215948
uni_2695	1713.84	218356
uni_8426	1749.14	227432
uni_4393	1462.92	220488
uni_2701	1580.11	218128
uni_6969	2423.17	292108
uni_2776	1811.38	241108
uni_8451	1514.85	221616
uni_6544	1522.77	222476
uni_4270	2002.78	237224
uni_5835	2147.96	221300
uni_469	1812.73	231396
uni_3169	1652.79	221376
uni_833	1358.72	212856
uni_5418	1737.06	222452
uni_9239	1646.54	230172
uni_844	1023.11	205544
uni_5842	2017.98	248944
uni_9343	1331.19	243416
uni_7256	2334.59	266156
uni_5562	1815.03	219976
uni_5938	1831.88	243740
uni_3064	1684.37	217964
uni_564	1543.71	217312
uni_1750	1784.21	236008
uni_5481	1628.80	224388
uni_513	2324.85	251804
uni_1727	1407.31	222880
uni_3013	1743.48	224656
uni_5515	1500.03	218512
uni_487	1527.41	207284
uni_7221	1554.39	229384
uni_3187	1747.53	240028
uni_9334	1656.45	259936
uni_949	1442.94	214660
uni_6079	1775.79	231696
uni_99	2030.67	223604
uni_6097	1470.92	218436
uni_2331	1602.30	224172
uni_77	1896.51	256756
uni_8182	1397.63	231612
uni_6103	1525.30	222392
uni_4637	1999.61	223796
uni_8016	2405.58	236460
uni_8061	2115.40	224512
uni_4640	2137.15	237536
uni_6174	1803.75	224716
uni_2346	2238.34	266008
uni_10000	2905.33	252900
uni_3903	1417.46	214264
uni_3897	1877.64	233780
uni_3559	1531.54	219700
uni_7688	1250.30	215020
uni_5028	2141.15	259024
uni_9609	1831.15	222644
uni_3974	1539.86	215856
uni_154	1717.52	221592
uni_1360	1948.01	230428
uni_3454	2151.34	259216
uni_9773	2274.02	239904
uni_5152	2367.73	263364
uni_7666	1899.89	233824
uni_7611	1839.11	240348
uni_5125	1359.47	208448
uni_1283	1767.23	227592
uni_3879	2259.47	245804
uni_9704	1531.89	222764
uni_7785	1847.72	217664
uni_3423	2233.65	279344
uni_123	1708.81	224240
uni_1317	1525.11	215736
uni_9690	1422.35	239072
uni_2241	1443.78	218296
uni_8166	2262.82	229288
uni_93	2094.47	241088
uni_4747	1833.29	226780
uni_6073	2209.99	242104
uni_6004	2003.16	234000
uni_4730	2049.08	220964
uni_8111	1635.66	225628
uni_6190	1721.41	231824
uni_2236	1585.08	218748
uni_8085	1730.51	221788
uni_8188	1708.05	221984
uni_6109	1870.46	242236
uni_7682	1450.97	229296
uni_3524	1416.14	228360
uni_1210	2188.10	222968
uni_9797	1223.54	218316
uni_7716	2324.83	230552
uni_5022	1966.36	231372
uni_1384	2016.13	253240
uni_9603	1512.79	247528
uni_9674	1455.78	261968
uni_3909	1193.09	208036
uni_5055	2145.13	272668
uni_7761	1680.74	221268
uni_1267	2379.87	244064
uni_3553	1381.94	213704
uni_1289	1515.14	213300
uni_3873	1798.23	222272
uni_129	1607.85	218640
uni_3429	1757.26	226340
uni_3990	1963.78	244396
uni_3804	1878.40	234764
uni_9779	1413.02	226516
uni_5158	1751.74	226256
uni_8556	1843.35	225776
uni_6443	1787.82	228800
uni_4377	1783.30	215660
uni_8898	1499.17	214216
uni_6819	2440.22	254908
uni_2671	2032.71	222452
uni_4294	1827.92	231288
uni_2606	1841.68	245296
uni_4300	2624.15	263668
uni_6434	1919.29	227568
uni_2792	2265.40	283152
uni_8521	2208.37	238860
uni_6914	1859.54	228612
uni_8801	1863.19	256392
uni_6880	1606.30	217808
uni_8995	1876.14	237464
uni_6539	2161.55	220932
uni_4399	1644.32	217548
uni_8876	1966.24	233768
uni_6963	1723.08	221944
uni_5412	1790.64	220244
uni_580	1665.91	215084
uni_7326	2172.11	271100
uni_3080	1749.61	218120
uni_9233	2340.35	223836
uni_5586	1501.28	234368
uni_414	1482.69	225656
uni_1620	2003.83	230568
uni_3114	1626.27	250628
uni_5848	1658.02	240116
uni_3163	1581.53	217760
uni_463	1628.17	225008
uni_1657	1781.96	223592
uni_839	1541.70	221112
uni_9244	1530.20	220512
uni_7351	1841.79	227448
uni_5465	1686.58	215944
uni_3019	1780.02	220004
uni_519	1477.18	213980
uni_5945	1453.83	217408
uni_943	1904.54	227052
uni_934	1656.05	220416
uni_9349	1764.37	253884
uni_5568	1801.72	224036
uni_5932	1933.14	249900
uni_7838	1510.37	217240
uni_3650	1635.61	243528
uni_350	1720.41	222876
uni_1164	1847.56	234736
uni_9577	1868.08	225500
uni_7462	1974.46	222136
uni_5356	1722.77	232456
uni_1087	1741.82	235336
uni_5321	2176.34	263216
uni_7415	1473.54	219564
uni_9500	1821.26	251820
uni_327	1434.52	238440
uni_1113	2042.17	252568
uni_3627	2326.85	269224
uni_7581	2648.21	254968
uni_9494	1689.57	232272
uni_7935	1427.73	213004
uni_9820	1587.56	231924
uni_1069	1881.85	234260
uni_9857	1736.57	222752
uni_7942	1632.12	234356
uni_9599	1390.57	228644
uni_7518	1608.51	226376
uni_2135	1518.38	224960
uni_6293	1483.40	217976
uni_8386	1381.67	226364
uni_4869	1411.42	214460
uni_4433	1510.32	214568
uni_6307	1798.46	239364
uni_8212	1816.93	274380
uni_8265	1626.51	226740
uni_6370	1201.93	219588
uni_4444	1848.61	236676
uni_2142	1695.52	224736
uni_2038	1898.38	231892
uni_4964	1687.81	233572
uni_4913	1752.52	220288
uni_8368	1516.02	219224
uni_4887	1537.12	216800
uni_4549	2027.15	240048
uni_9147	2118.28	262408
uni_5766	1658.57	221228
uni_7052	2104.12	230596
uni_760	2065.33	227176
uni_1554	1756.77	243528
uni_3260	2119.14	236020
uni_3217	1138.31	207524
uni_717	2136.73	226312
uni_1523	1863.11	230308
uni_5685	2479.69	273968
uni_3383	1383.97	221728
uni_7025	1947.99	240348
uni_683	2217.60	259228
uni_5711	1452.32	222240
uni_1979	2271.74	241996
uni_9130	1191.70	221652
uni_1997	1972.54	244200
uni_1459	2112.65	222572
uni_1803	1888.87	226688
uni_7128	2586.05	286628
uni_1874	2152.47	241812
uni_5788	1675.01	215412
uni_2491	1898.39	228036
uni_6737	1820.43	227104
uni_4003	1412.10	215480
uni_8622	1948.64	246984
uni_2505	1600.00	215472
uni_4197	1820.78	225628
uni_2572	2186.21	246764
uni_8655	1940.67	229356
uni_2928	1538.07	218824
uni_4074	1316.21	214632
uni_6740	1909.16	234068
uni_2408	1796.87	227020
uni_2852	2213.28	249988
uni_2825	1423.59	239564
uni_8758	1638.79	247460
uni_4179	1818.82	222176
uni_1529	2061.88	227120
uni_689	2058.84	235340
uni_3389	1807.15	221816
uni_1973	2009.70	244780
uni_1904	1571.82	213932
uni_7058	1605.32	240012
uni_1890	1923.67	230764
uni_3284	1729.36	224216
uni_7122	1901.04	240044
uni_784	1595.91	210420
uni_5616	1341.00	236712
uni_9037	1599.44	215768
uni_3310	1514.44	212960
uni_610	1735.40	232852
uni_1424	1844.48	226620
uni_5782	1576.40	220124
uni_667	1699.54	217008
uni_1453	1925.41	235940
uni_3367	2466.89	276364
uni_9040	1500.94	217652
uni_1809	1811.18	219528
uni_5661	1734.39	228900
uni_7155	1590.61	223192
uni_2578	1606.16	222456
uni_2922	1745.33	227352
uni_4009	1400.23	233920
uni_8628	1736.27	240000
uni_2955	1862.10	228424
uni_8752	1155.64	219768
uni_4173	2041.10	259188
uni_6647	1904.91	230636
uni_2475	1650.32	215480
uni_2402	1937.67	258724
uni_4090	1435.04	215628
uni_2596	2014.63	236400
uni_6630	2203.18	225456
uni_4104	1606.56	226392
uni_2858	1815.46	234588
uni_8725	1587.73	223048
uni_1119	1766.11	222996
uni_9950	1575.99	232560
uni_7845	1751.42	233496
uni_7832	1733.44	225248
uni_9927	1645.53	250784
uni_7468	2691.42	266292
uni_220	2088.87	260308
uni_1014	1783.40	243828
uni_3720	1811.43	266684
uni_7486	1384.12	232828
uni_9593	1781.15	235956
uni_7948	1920.75	224104
uni_1180	1663.15	218292
uni_5226	1785.42	224116
uni_7512	1824.85	229672
uni_9407	1643.62	219160
uni_9470	1424.79	282592
uni_7565	1647.05	219628
uni_5251	2264.53	227496
uni_3757	2006.17	251736
uni_257	1843.77	238700
uni_1063	1745.65	228072
uni_4980	1291.88	209420
uni_4814	1646.08	222424
uni_2148	1684.26	217680
uni_6299	1709.54	227584
uni_4863	2102.09	281924
uni_4439	1995.69	240316
uni_8218	1540.09	218776
uni_4919	1561.50	223612
uni_2045	1596.15	222160
uni_8362	1947.47	216032
uni_6277	1499.24	211460
uni_4543	1433.37	228912
uni_4534	1553.31	223460
uni_6200	2103.86	248836
uni_8315	1450.94	216072
uni_2032	1931.50	229964
uni_6394	1689.37	229812
uni_8281	1638.67	220528
uni_3946	1950.81	255636
uni_3488	2144.34	226880
uni_188	1656.43	229192
uni_1228	2040.20	237824
uni_7759	1961.66	228364
uni_3931	1894.19	231116
uni_1325	1900.25	231440
uni_111	1803.01	225480
uni_5083	2240.55	243760
uni_3411	1538.83	227192
uni_9736	2242.62	273888
uni_5117	1660.50	219220
uni_3585	1443.52	222620
uni_7623	1975.32	236656
uni_7654	1327.17	213988
uni_5160	2085.25	269512
uni_9741	1985.90	252140
uni_3466	1770.94	223144
uni_1352	1922.22	231260
uni_166	2487.98	269652
uni_2279	1418.14	214460
uni_8129	1937.76	230528
uni_4708	1828.89	222844
uni_2374	1544.21	211548
uni_32	1401.40	217976
uni_6146	2088.87	263108
uni_4672	1757.54	227596
uni_8053	2096.37	230704
uni_8024	2272.07	235000
uni_4605	2174.07	233056
uni_2297	1374.24	216844
uni_6131	1876.29	251652
uni_45	2136.05	264232
uni_4791	1708.32	223548
uni_2303	1745.09	221124
uni_5870	1901.84	228072
uni_1618	1754.38	261408
uni_876	1937.09	239060
uni_7369	1854.85	259944
uni_801	1850.88	215844
uni_5993	1923.45	237792
uni_995	1740.40	236488
uni_5807	1953.73	218608
uni_9306	1715.13	236452
uni_7213	1672.34	229548
uni_1681	2104.39	225152
uni_5527	2482.03	243772
uni_9292	1277.03	229052
uni_3021	2013.13	229548
uni_7387	1770.69	230904
uni_1715	1630.98	246320
uni_521	1722.56	219660
uni_1762	1870.66	245304
uni_556	1996.38	223468
uni_3056	1930.77	232704
uni_898	1540.97	222768
uni_5550	1524.59	220968
uni_7264	1716.32	223664
uni_9371	2238.89	229912
uni_2649	1304.96	212948
uni_8934	1586.49	227904
uni_6821	1880.82	233740
uni_8519	2239.06	262724
uni_4338	2161.89	251532
uni_6856	1397.18	211724
uni_8943	1691.66	217784
uni_6598	2045.68	227644
uni_4242	1746.01	228072
uni_6576	1719.58	238460
uni_8463	1438.28	218412
uni_8839	1756.85	234176
uni_2744	1884.68	224704
uni_8580	1396.12	213968
uni_2733	2012.75	219504
uni_6495	1822.59	235584
uni_8414	1687.07	238700
uni_6501	1673.57	224320
uni_4235	1724.67	246188
uni_5457	1936.14	233764
uni_7363	1667.62	225240
uni_9276	1776.55	221172
uni_5999	1760.99	230148
uni_1665	1681.47	221064
uni_451	1720.83	225316
uni_3151	1301.78	262660
uni_9395	2096.39	230044
uni_3126	2121.21	256604
uni_7280	1866.20	219316
uni_1612	1475.59	216416
uni_426	1395.79	215596
uni_9201	1434.54	220376
uni_7314	1570.29	226224
uni_1786	1703.82	219336
uni_5420	1927.83	242656
uni_1768	1578.40	213296
uni_892	1639.04	215604
uni_5900	1830.65	224176
uni_906	1730.36	223472
uni_5894	1531.41	212420
uni_971	2192.50	250308
uni_7219	1728.20	227844
uni_9298	1537.82	224372
uni_5977	1505.36	213468
uni_8513	1697.71	255144
uni_6406	1609.24	221036
uni_4332	1457.54	214924
uni_8487	1510.65	226084
uni_2634	2163.06	230288
uni_6592	1783.07	231504
uni_8949	1973.77	248908
uni_2643	1626.73	221900
uni_4345	1746.37	222892
uni_6471	1684.96	216936
uni_8564	2059.96	243848
uni_6951	1899.98	223412
uni_8844	1826.92	226464
uni_2739	1572.54	213876
uni_4248	1968.49	239184
uni_8469	1448.33	212920
uni_8833	1587.88	229596
uni_6926	1579.00	226308
uni_3561	1557.29	235332
uni_1255	1742.84	235972
uni_7753	1196.15	217296
uni_5067	1794.06	231812
uni_9646	1922.46	252916
uni_9631	1596.75	226924
uni_182	1244.54	211672
uni_5010	1648.76	222204
uni_3482	2095.08	250716
uni_7724	1885.55	232364
uni_1222	1457.45	218092
uni_5184	2034.62	221068
uni_3516	1421.47	220708
uni_3836	1792.53	245164
uni_1358	1609.55	219144
uni_5089	2117.66	230240
uni_3841	1694.62	219876
uni_7629	1960.64	239824
uni_4696	1727.61	227236
uni_2204	1403.97	218560
uni_8123	2308.47	228336
uni_4702	1266.01	217860
uni_2390	1391.26	208644
uni_6036	1703.05	224212
uni_6041	1401.32	212260
uni_4775	1760.85	229132
uni_8154	1558.00	226476
uni_2273	1759.40	220376
uni_2309	2051.02	228300
uni_38	1488.85	220464
uni_4678	1518.47	213312
uni_8059	2030.64	248024
uni_6772	1562.66	218456
uni_4046	1927.82	226788
uni_8667	1909.03	218640
uni_2540	2090.89	270460
uni_8784	2025.87	241328
uni_6691	1920.10	229160
uni_2537	1299.04	207128
uni_8610	1749.99	225044
uni_4031	2087.19	258904
uni_6705	1433.37	220772
uni_2983	2417.23	242712
uni_2817	1231.18	208400
uni_2860	1928.12	247384
uni_6608	1847.92	243396
uni_8689	1498.67	220120
uni_9102	1675.73	249124
uni_5723	1540.95	215196
uni_1485	1690.30	219260
uni_7017	1385.01	220672
uni_9096	1741.16	225560
uni_1511	1977.24	235852
uni_725	1864.01	231572
uni_7183	1528.39	217656
uni_3225	1492.09	248676
uni_3252	1616.19	226168
uni_1566	1592.94	217928
uni_752	1962.03	230464
uni_7060	1476.92	218612
uni_5754	1899.85	253684
uni_9175	1588.87	250564
uni_3328	1603.89	232940
uni_628	1541.11	212444
uni_1846	1587.89	218540
uni_1588	1619.08	218436
uni_5659	1644.88	218656
uni_9078	2194.02	286684
uni_1831	1509.91	241088
uni_2170	1997.89	229468
uni_4476	2104.01	229204
uni_6342	1649.49	210976
uni_8257	1655.82	221240
uni_8220	2454.65	239844
uni_6335	1576.39	217380
uni_2093	1519.27	263940
uni_4401	1437.02	216604
uni_2107	1638.88	221948
uni_4595	1934.66	220780
uni_4921	1569.04	232824
uni_4956	1937.24	262680
uni_4498	1477.94	233044
uni_6238	1361.49	225020
uni_3615	1357.98	213748
uni_5287	1610.79	217608
uni_1121	1685.19	212916
uni_315	1904.56	224768
uni_9968	1875.91	253432
uni_9532	1777.12	230544
uni_7427	1608.34	222788
uni_3781	2223.90	267476
uni_5313	1830.28	229736
uni_281	1701.87	218996
uni_5364	2093.95	223016
uni_7450	1556.82	221744
uni_9545	1789.41	229688
uni_1156	2064.28	249860
uni_362	1480.11	214956
uni_3662	1553.33	220004
uni_7970	1380.61	219276
uni_218	1678.96	215480
uni_9865	1407.55	239276
uni_3718	1735.93	220764
uni_9812	1903.52	231808
uni_7907	2087.00	250368
uni_5269	1712.79	220860
uni_9986	1962.69	241032
uni_7893	1451.57	242432
uni_9448	2203.40	255200
uni_2099	1821.31	228992
uni_4851	1998.06	218560
uni_4826	1316.37	209912
uni_6348	2169.21	227564
uni_2000	1729.20	249808
uni_4492	1635.07	215760
uni_8327	1563.93	217592
uni_6232	2023.19	226332
uni_2194	1695.02	226332
uni_4506	2140.28	228180
uni_4571	1719.24	221864
uni_6245	2041.10	239108
uni_8350	1976.34	242252
uni_2077	1789.40	222660
uni_9881	1594.35	239548
uni_7994	2366.35	238276
uni_3668	1830.41	225208
uni_9915	2049.90	233244
uni_368	1552.81	248476
uni_7800	1644.08	227772
uni_7877	1559.81	224348
uni_9962	1709.06	246524
uni_9538	1476.90	230812
uni_5319	2146.88	255368
uni_9818	1840.12	231428
uni_1051	1728.17	224888
uni_265	1901.62	226864
uni_3765	1993.33	229492
uni_5263	2029.50	227212
uni_7557	1604.39	231080
uni_9442	1787.26	220736
uni_7899	1913.28	236480
uni_9435	1797.53	236452
uni_7520	1164.32	206044
uni_3686	2003.89	235344
uni_5214	1820.99	235192
uni_386	1551.83	213472
uni_3712	1680.92	227468
uni_5380	2086.77	242924
uni_1026	1980.65	237180
uni_212	1742.25	238060
uni_2967	1623.51	223392
uni_6778	1778.45	223848
uni_2910	1475.44	217164
uni_2884	2095.19	254952
uni_8717	1916.74	249280
uni_4136	1924.94	229864
uni_6602	1824.62	231720
uni_8683	1478.26	215860
uni_6796	1836.82	227024
uni_2430	1730.92	224528
uni_2447	1167.32	215344
uni_2989	1297.47	223960
uni_6675	1676.24	226428
uni_4141	1780.64	218772
uni_8760	2339.49	269300
uni_758	1808.79	235088
uni_3258	1427.30	220776
uni_1936	1841.52	231632
uni_1941	1883.86	226696
uni_9108	2025.85	264632
uni_5729	1554.40	219504
uni_7189	2316.43	264968
uni_7167	2085.35	264580
uni_5653	1538.12	217052
uni_9072	1880.62	232452
uni_3355	2043.40	223676
uni_1461	1695.26	223848
uni_655	1782.37	225348
uni_9191	1416.80	225972
uni_1416	1875.48	236232
uni_622	1599.72	222748
uni_7084	1917.21	228076
uni_3322	1768.99	237028
uni_9005	1413.94	218972
uni_5624	1644.40	228256
uni_1582	1736.21	226772
uni_7110	1697.23	234348
uni_2867	1445.92	219784
uni_2810	1539.71	217604
uni_6678	2157.72	257888
uni_2984	2010.49	219364
uni_4036	1190.85	209504
uni_6702	1373.45	226512
uni_8617	1597.92	221684
uni_2530	2216.27	252392
uni_6696	1756.22	220984
uni_8783	1587.63	218828
uni_2889	2069.00	239124
uni_2547	1571.99	218844
uni_8660	1531.35	214848
uni_6775	1892.62	234440
uni_4041	1956.38	248540
uni_658	1459.63	211820
uni_3358	1543.07	214460
uni_1836	1494.37	218536
uni_5629	1756.30	227048
uni_9008	1495.69	217444
uni_1841	1356.79	211516
uni_7089	1974.58	243748
uni_9172	1514.56	217492
uni_7067	2079.06	230592
uni_5753	2039.45	220736
uni_3255	2400.11	268516
uni_755	1876.90	229456
uni_1561	1653.23	223824
uni_722	1570.29	225620
uni_1516	1609.20	224712
uni_3222	2894.06	270600
uni_7184	2019.10	231708
uni_9091	1932.39	245008
uni_1482	1219.98	211540
uni_5724	2074.26	251608
uni_7010	2250.32	240036
uni_9105	1704.23	220196
uni_2199	1564.72	213292
uni_4951	1863.79	221948
uni_4926	1522.87	252028
uni_6248	1879.54	237780
uni_2100	1523.87	218396
uni_4592	2020.36	222520
uni_2094	1182.23	211788
uni_6332	2567.48	299896
uni_4406	1545.98	217416
uni_8227	1825.98	225192
uni_8250	1706.10	227220
uni_4471	1940.48	222784
uni_6345	1912.43	221156
uni_2177	1455.48	212588
uni_7894	1791.61	226340
uni_9981	1632.42	245456
uni_7900	2025.08	247296
uni_3768	2259.38	234792
uni_268	1849.51	223360
uni_9815	1860.53	236580
uni_9862	1767.76	274704
uni_7977	2038.26	239764
uni_5219	2052.43	246976
uni_9438	2561.25	256612
uni_365	1635.07	218944
uni_1151	1908.23	251548
uni_9918	1599.86	253708
uni_3665	1500.54	221132
uni_9542	1615.86	241280
uni_7999	1366.04	215724
uni_5363	1732.24	230224
uni_7457	2198.50	239824
uni_3786	1701.36	225232
uni_7420	1906.66	232396
uni_286	2052.36	234304
uni_5314	2210.16	241688
uni_9535	1632.80	264736
uni_3612	1408.89	215768
uni_312	1573.30	216316
uni_1126	1743.40	226836
uni_5280	2163.42	244788
uni_2070	1956.69	242144
uni_8357	1722.86	220220
uni_4576	1645.56	224828
uni_6242	1602.48	217260
uni_2193	1536.95	221648
uni_6235	1745.86	233884
uni_4501	1610.74	221376
uni_8320	1753.54	233848
uni_2007	2033.71	226312
uni_4495	1546.70	218744
uni_4821	1514.12	217544
uni_4598	1871.20	229692
uni_4856	1993.75	218800
uni_6338	1621.34	227388
uni_3715	1296.58	216800
uni_9868	1576.52	249020
uni_215	2005.60	221848
uni_1021	1933.88	226368
uni_5387	2205.42	258824
uni_3681	1621.90	224408
uni_7527	1284.80	218700
uni_381	1463.23	213488
uni_5213	1718.74	226664
uni_9432	1816.68	232488
uni_9445	2086.72	239576
uni_5264	1874.37	226760
uni_7550	1836.11	215264
uni_262	2416.64	273000
uni_1056	1528.05	214984
uni_3762	1545.81	222560
uni_9965	1633.02	235796
uni_318	1839.52	235288
uni_3618	1813.58	217752
uni_7870	1908.91	238084
uni_7807	2420.91	281912
uni_9912	1663.01	252772
uni_7993	1940.21	220324
uni_9548	1775.17	232064
uni_9886	1781.99	236084
uni_5369	2274.64	229492
uni_8767	1695.29	221176
uni_6672	1297.64	212520
uni_4146	1609.28	223432
uni_2440	1848.62	233844
uni_2437	2467.12	249472
uni_6791	1561.45	234704
uni_8684	1815.30	275164
uni_4131	1928.91	226904
uni_6605	2388.80	262108
uni_8710	1680.97	224740
uni_2883	1647.32	214100
uni_2917	2259.91	241532
uni_6708	1461.80	215344
uni_2960	1960.19	221560
uni_8789	1364.07	213672
uni_1585	1876.47	233832
uni_5623	1701.31	223364
uni_7117	1815.08	222868
uni_9002	1875.82	229316
uni_625	2037.60	253436
uni_1411	1757.59	222744
uni_3325	1946.75	225668
uni_7083	2177.48	241024
uni_9196	1620.57	219564
uni_3352	1666.40	211732
uni_652	1314.24	210572
uni_1466	1239.50	220176
uni_9075	1370.75	223316
uni_7160	2351.04	267736
uni_5654	1602.94	219376
uni_3228	1639.49	220196
uni_728	1527.36	214660
uni_1488	1388.58	210592
uni_1946	1786.15	217548
uni_1931	1553.73	219552
uni_9178	1566.38	220140
uni_5759	1864.52	223340
uni_3461	1838.57	215452
uni_161	1623.92	217524
uni_1355	1692.64	227780
uni_9746	1874.65	275508
uni_7653	1502.07	218744
uni_5167	1298.75	211220
uni_5110	1900.02	230596
uni_7624	1369.81	230292
uni_3582	1396.98	220100
uni_9731	1767.15	241712
uni_5084	1565.69	229208
uni_116	1824.52	226104
uni_1322	1795.68	212380
uni_3416	1436.47	224892
uni_3936	1999.39	236736
uni_1258	2093.72	231156
uni_5189	2243.69	233584
uni_7729	1524.69	232156
uni_3941	1483.96	214180
uni_42	1312.71	246360
uni_4796	1458.04	226564
uni_2304	2013.16	255792
uni_4602	1227.14	219472
uni_6136	2024.36	231984
uni_2290	1701.60	217740
uni_8023	1758.66	227460
uni_8054	1334.65	243720
uni_6141	2441.48	253116
uni_4675	1716.74	242912
uni_2373	1791.13	238092
uni_35	1751.76	221700
uni_2209	1815.90	219548
uni_8159	1695.72	215036
uni_4778	1857.77	237180
uni_5899	1704.30	219244
uni_9376	1818.09	237056
uni_5557	1346.97	216560
uni_7263	1835.12	224348
uni_551	1401.28	217240
uni_1765	2033.82	236080
uni_3051	1600.83	222668
uni_7380	1939.40	250708
uni_3026	1694.42	218384
uni_526	1565.63	212664
uni_1712	2014.09	248020
uni_9295	2011.11	253564
uni_7214	1705.71	238648
uni_5520	1799.38	219756
uni_1686	1726.09	213056
uni_9301	1838.61	231076
uni_5800	2236.22	262960
uni_992	1467.74	214944
uni_1668	1163.59	207428
uni_5994	1461.33	237092
uni_806	1304.04	213112
uni_7319	1620.08	217272
uni_871	1803.88	276932
uni_5877	1639.44	222196
uni_9398	1805.04	228712
uni_6506	1957.32	270936
uni_4232	1638.05	219072
uni_8413	1564.52	230272
uni_6492	1637.67	230084
uni_2734	1298.52	218040
uni_8849	1056.34	257884
uni_8587	1941.97	225088
uni_2743	1426.55	214588
uni_8464	1861.66	227856
uni_4245	1799.90	244040
uni_6571	1300.65	212568
uni_8944	1477.93	229812
uni_2639	1709.41	216504
uni_6851	1761.11	238712
uni_8569	1672.48	218896
uni_4348	1578.02	222164
uni_6826	1566.98	220760
uni_8933	1786.69	233140
uni_1718	1509.33	217520
uni_5970	1929.78	254840
uni_976	2000.35	254272
uni_5893	2022.75	247320
uni_901	1821.95	220808
uni_7269	2246.69	225376
uni_5907	1338.05	211900
uni_895	1723.68	223556
uni_7313	2145.65	244188
uni_5427	1970.22	237096
uni_1781	1651.48	216416
uni_9206	1789.19	239372
uni_7287	1813.42	249720
uni_3121	1697.50	224856
uni_421	1778.06	224724
uni_1615	1501.13	216396
uni_9392	1658.45	276620
uni_998	1686.49	214820
uni_456	1546.87	217624
uni_1662	1924.46	230120
uni_3156	1695.67	220280
uni_9271	2200.04	230428
uni_5450	1989.28	217848
uni_7364	1406.84	212840
uni_6921	1385.96	217984
uni_2749	1570.74	236860
uni_8834	2327.46	245172
uni_4238	2771.53	235156
uni_8419	2065.69	259112
uni_8843	2178.39	266644
uni_6498	1800.23	228792
uni_6956	1188.27	212804
uni_8563	1660.41	220220
uni_4342	2021.02	239808
uni_6476	2153.79	239576
uni_8939	1152.56	222976
uni_2644	1828.78	236148
uni_6595	2200.37	232708
uni_2633	1638.88	214028
uni_8480	1383.90	213044
uni_6401	2519.05	238692
uni_4335	1814.73	228004
uni_8514	2086.51	263020
uni_3588	1760.19	219640
uni_3846	1807.38	231152
uni_1328	1610.30	220528
uni_3831	1921.62	229576
uni_7659	1867.75	229624
uni_5183	2797.65	258724
uni_1225	1609.05	229236
uni_3511	1591.74	235116
uni_5017	1729.95	224160
uni_185	1614.39	219288
uni_7723	1881.09	235648
uni_3485	2064.94	219208
uni_9636	1790.10	238692
uni_9641	1756.97	236704
uni_7754	1897.39	217736
uni_5060	1502.35	211200
uni_3566	2023.30	251044
uni_1252	1807.49	222392
uni_2379	1887.84	230336
uni_48	1473.03	207328
uni_4608	1444.41	217476
uni_8029	1537.40	218068
uni_2274	1655.87	226584
uni_8153	1573.24	216468
uni_6046	1900.95	229848
uni_4772	2765.13	263220
uni_4705	1362.79	211264
uni_6031	1891.72	223888
uni_2397	1903.28	228108
uni_8124	1332.98	213108
uni_4691	1766.55	222044
uni_2203	1672.79	219480
uni_7945	2130.90	242588
uni_9850	1670.21	222580
uni_1019	1782.96	228120
uni_9827	1747.14	225980
uni_7932	1441.13	218488
uni_7568	1937.69	242572
uni_9493	1491.33	221556
uni_7848	1728.20	237788
uni_1114	1537.39	217588
uni_320	1926.64	235188
uni_7586	1540.94	214216
uni_3620	1773.91	227276
uni_9507	1504.66	228148
uni_5326	1631.25	216736
uni_1080	1863.09	227932
uni_7412	1865.08	222324
uni_7465	1844.13	232492
uni_5351	1667.21	230448
uni_9570	1926.37	231704
uni_3657	1754.60	223516
uni_1163	1604.26	223464
uni_357	1537.50	213028
uni_4880	2283.82	265364
uni_2048	1758.77	216364
uni_4914	1493.93	213660
uni_4963	2034.96	241356
uni_6399	1962.21	223144
uni_8318	2166.47	226664
uni_4539	1894.06	225684
uni_2145	1781.51	230076
uni_4819	1583.27	216468
uni_6377	1572.13	271924
uni_4443	1737.86	221500
uni_8262	1394.00	212232
uni_8215	1659.86	224928
uni_4434	1854.37	226284
uni_6300	1597.46	216624
uni_8381	1649.96	225896
uni_6294	1848.89	221868
uni_2132	1995.66	249312
uni_1429	1518.40	222320
uni_1873	1979.49	240820
uni_789	1751.99	231840
uni_3289	1436.29	211312
uni_7158	1825.54	225088
uni_1804	1662.92	221748
uni_1990	1776.32	236160
uni_9137	1432.17	237024
uni_7022	2171.20	239904
uni_3384	1682.49	228132
uni_5716	1572.77	216428
uni_684	1638.69	231724
uni_3210	1596.11	229172
uni_5682	1774.32	261964
uni_1524	1920.63	236456
uni_710	1526.77	215544
uni_1553	2499.89	276364
uni_767	1586.73	223136
uni_3267	1267.45	217168
uni_5761	1523.47	221132
uni_7055	1773.44	223504
uni_1909	2213.21	259008
uni_9140	2177.56	271372
uni_2478	1706.97	218000
uni_2822	1698.67	214472
uni_8728	1252.60	224048
uni_2855	1595.73	216840
uni_4109	1745.88	224932
uni_4073	2001.76	256168
uni_6747	1459.91	215920
uni_8652	2057.28	221724
uni_2575	2011.38	235672
uni_2502	1925.24	247504
uni_4190	1840.74	230828
uni_2958	1813.31	227496
uni_8625	1851.81	235812
uni_6730	1732.43	225168
uni_2496	1754.34	227628
uni_4004	1836.46	226028
uni_5666	1879.42	225660
uni_7152	1710.46	255384
uni_9047	1803.07	252412
uni_1454	1867.92	248272
uni_660	1572.11	216508
uni_3360	1347.84	220860
uni_3317	1865.82	235544
uni_5785	1462.02	219660
uni_1423	1773.82	232984
uni_617	1585.51	215596
uni_9030	1376.94	234644
uni_1879	1785.27	246372
uni_7125	2326.97	227316
uni_3283	1484.35	211516
uni_5611	1810.89	243308
uni_783	2469.69	263760
uni_1559	1642.72	216532
uni_1897	1867.73	225100
uni_1903	1681.90	231064
uni_1974	1479.40	213996
uni_7028	1565.66	214076
uni_5688	1701.38	221756
uni_8722	1777.83	237228
uni_6637	2141.97	262844
uni_2591	1971.76	237196
uni_4103	1609.99	218844
uni_2405	2055.25	250896
uni_4097	1437.74	212172
uni_2472	1465.47	242188
uni_4174	1506.77	220896
uni_6640	1880.28	229340
uni_8755	1709.21	232712
uni_2828	1488.53	215488
uni_2508	1232.13	232872
uni_2952	1894.78	222420
uni_4079	1944.44	237240
uni_2925	1677.49	214128
uni_8658	1517.00	220052
uni_3750	1653.42	221292
uni_1064	1831.48	219144
uni_250	2007.49	235712
uni_7938	1957.15	245912
uni_7562	2060.33	266796
uni_5256	1067.09	215084
uni_9477	1830.57	248808
uni_9400	1324.99	210288
uni_5221	1726.33	227500
uni_1187	2480.07	249224
uni_7515	1618.41	222084
uni_9594	1153.64	219356
uni_1013	1777.20	221784
uni_227	2873.64	276244
uni_7481	1859.51	235884
uni_3727	1705.24	233916
uni_1169	1709.58	221596
uni_9920	2093.92	234988
uni_7835	2152.30	235532
uni_7842	2624.17	259432
uni_9499	1613.61	232004
uni_9957	1606.95	227352
uni_7418	1565.51	239688
uni_4969	1811.29	219660
uni_8286	1591.23	247172
uni_6393	2008.14	241420
uni_2035	1759.02	231776
uni_8312	1894.43	233784
uni_4533	1541.36	219476
uni_6207	1554.71	231028
uni_6270	1945.77	242612
uni_4544	1470.23	234076
uni_8365	1714.10	223160
uni_2042	1441.91	215552
uni_4864	1906.12	235136
uni_2138	2288.15	252364
uni_4813	1825.80	220352
uni_4449	1431.33	217664
uni_4987	1643.94	233308
uni_8268	1625.41	232208
uni_6543	2184.63	231236
uni_8998	1741.14	228100
uni_4277	1451.93	215792
uni_8456	1540.08	233248
uni_2771	1121.08	216188
uni_6919	1988.97	244176
uni_4394	1610.94	216020
uni_2706	1769.65	250704
uni_8421	1549.47	233452
uni_4200	1373.23	222248
uni_2692	1986.56	241200
uni_6534	2087.30	221352
uni_8901	2040.92	250524
uni_6814	1902.37	233048
uni_8895	1804.71	224324
uni_6980	1817.27	222528
uni_6439	1853.22	228400
uni_6863	1916.03	231548
uni_8976	1516.42	223396
uni_4299	2424.05	231292
uni_9333	1345.41	242640
uni_480	1640.04	216380
uni_5512	1537.74	213284
uni_3180	1718.25	226516
uni_7226	2186.60	258460
uni_5948	1766.91	224936
uni_1720	1367.78	221760
uni_514	1263.63	208060
uni_5486	1585.32	251172
uni_3014	1873.18	242732
uni_3063	2430.87	275492
uni_1757	1766.33	220004
uni_563	1882.99	238640
uni_7251	1607.08	219268
uni_5565	1641.38	217772
uni_9344	1427.44	242860
uni_939	1716.93	217856
uni_5845	2250.30	264164
uni_3119	1894.11	221292
uni_419	1753.94	223360
uni_843	1405.66	215588
uni_5468	1663.88	219916
uni_9249	2435.65	279156
uni_834	2343.37	251808
uni_5832	2007.39	236260
uni_2341	1399.13	231432
uni_4647	1327.39	222728
uni_6173	2300.33	249980
uni_8066	1735.43	234784
uni_8011	1626.25	231892
uni_6104	1480.50	219156
uni_4630	1875.06	235276
uni_8185	1613.73	221648
uni_2336	1531.63	212452
uni_6090	1999.75	238268
uni_70	1576.96	230720
uni_8088	1569.66	215304
uni_6009	1675.40	220976
uni_9697	1805.87	246156
uni_3424	1718.78	241516
uni_7782	1450.36	217268
uni_1310	2477.30	269972
uni_124	1599.93	214372
uni_9703	1904.01	234524
uni_7616	1663.75	225116
uni_1284	1468.72	213860
uni_5122	1258.91	210056
uni_5155	1742.78	250144
uni_7661	1981.57	242732
uni_9774	2211.00	242512
uni_3809	2357.54	257376
uni_1367	2127.93	258812
uni_153	1769.55	228716
uni_3453	1455.26	209624
uni_3973	2027.99	266236
uni_1389	1764.79	229836
uni_3529	1878.55	232048
uni_3890	1821.58	223388
uni_5058	1761.92	221544
uni_3904	1837.83	247872
uni_9679	1770.15	231424
uni_6179	1810.36	272848
uni_8082	1571.13	223888
uni_2231	1757.99	231556
uni_6197	1911.59	221512
uni_8116	1656.07	240656
uni_6003	2210.31	245588
uni_4737	1835.92	221340
uni_94	1934.89	227344
uni_4740	2051.70	233768
uni_6074	1732.14	224992
uni_8161	1530.07	236312
uni_2246	1951.00	225564
uni_3803	1694.71	218132
uni_3459	1635.21	221848
uni_159	2084.40	236692
uni_3997	1970.64	235756
uni_7788	1548.24	211996
uni_9709	1957.86	218624
uni_3874	1752.05	221776
uni_5128	1726.80	220100
uni_1260	1724.41	218720
uni_3554	1650.62	224948
uni_5052	2275.09	273364
uni_7766	1964.19	233960
uni_9673	1621.17	220684
uni_3979	1791.01	226368
uni_9604	1754.67	257012
uni_7711	1801.16	228832
uni_1383	2018.10	241624
uni_5025	1516.25	226444
uni_9790	1777.44	226188
uni_3523	1997.54	239820
uni_7685	1815.35	239216
uni_1217	1836.84	238744
uni_6964	2074.62	256820
uni_8871	1566.57	223952
uni_2698	1545.56	234668
uni_8992	2148.61	224844
uni_6549	2173.04	225512
uni_6887	1651.63	235852
uni_8806	1581.52	217452
uni_6913	2028.38	218160
uni_8526	1477.01	229720
uni_4307	2034.60	264928
uni_2795	1570.56	241656
uni_6433	1829.08	225732
uni_6869	1503.75	217416
uni_4293	1909.14	244280
uni_2601	1868.08	226236
uni_2676	2272.39	262956
uni_6444	1574.48	221296
uni_4370	1978.62	230728
uni_8551	1769.68	224956
uni_569	2886.87	268708
uni_3069	1753.53	223940
uni_5935	1533.39	219248
uni_933	1743.34	259940
uni_944	1255.65	253068
uni_9339	1249.63	235508
uni_5518	1657.27	229108
uni_5942	1601.89	218564
uni_7356	1569.49	223356
uni_5462	2158.14	245508
uni_9243	1807.55	237400
uni_3164	1751.87	224680
uni_1650	1766.86	234996
uni_464	1544.61	226124
uni_5838	1686.85	216952
uni_1627	1553.88	220996
uni_413	1737.67	219484
uni_5581	1415.30	216584
uni_3113	1795.54	222512
uni_849	1904.51	225932
uni_9234	2175.79	242248
uni_587	1528.90	215800
uni_5415	1886.81	223720
uni_3087	1726.05	217428
uni_7321	1786.92	232104
uni_2890	1702.10	220460
uni_8679	1740.51	221916
uni_2904	2239.73	245800
uni_4058	1991.25	252068
uni_2973	2041.55	226888
uni_2529	1878.72	239500
uni_2809	1474.39	217436
uni_8774	2368.43	268280
uni_6661	1237.60	224420
uni_4155	1897.41	253240
uni_2453	1763.80	218328
uni_6782	1912.61	217536
uni_2424	1871.97	236144
uni_8697	1357.91	216096
uni_4122	1669.24	221876
uni_6616	1502.38	223656
uni_8703	2115.83	258408
uni_9088	1402.40	221752
uni_7009	1453.06	224948
uni_1955	1757.05	217804
uni_1922	1531.53	212296
uni_1578	1768.56	244212
uni_5630	1796.53	232572
uni_1596	1442.68	213684
uni_7104	1644.48	218908
uni_9011	1526.36	225812
uni_1858	1825.71	253356
uni_636	1671.68	223280
uni_1402	1601.10	241684
uni_7090	1379.35	226800
uni_3336	2278.65	235188
uni_9185	1645.19	247468
uni_3341	1601.64	232860
uni_641	1648.98	215848
uni_1475	1869.59	218520
uni_9066	1941.63	232120
uni_7173	1841.74	255756
uni_5647	1630.64	225068
uni_8249	2043.96	255904
uni_4468	2005.12	253120
uni_4832	1699.20	224016
uni_2119	2210.90	248644
uni_4845	1702.10	226580
uni_2063	1692.79	229664
uni_8344	1609.61	222168
uni_4565	1785.83	246260
uni_6251	2501.86	268316
uni_6226	1777.15	229036
uni_2180	1540.90	226628
uni_4512	2102.64	234168
uni_8333	1530.24	208496
uni_2014	1410.92	214420
uni_4486	1689.96	223556
uni_4948	1601.13	218540
uni_7439	1461.83	231104
uni_5299	1690.87	225620
uni_9976	1674.03	245012
uni_7863	1536.22	213620
uni_7814	1799.08	250520
uni_1148	1884.85	226692
uni_9901	1668.08	219208
uni_7980	1915.39	249076
uni_9895	1769.75	240212
uni_3706	1749.07	217676
uni_5394	1798.38	273212
uni_206	1977.55	256840
uni_1032	1883.26	218132
uni_7534	1359.63	211980
uni_3692	1611.26	222520
uni_5200	2123.75	237660
uni_392	2078.73	229288
uni_9421	1888.18	240424
uni_9456	1769.01	239564
uni_5277	1629.93	219040
uni_9998	1330.73	249844
uni_7543	1266.42	219552
uni_7919	1859.80	244132
uni_271	1628.22	221332
uni_1045	1514.80	215992
uni_3771	1727.19	214616
uni_2113	1955.32	233576
uni_4581	2005.03	250108
uni_6321	2323.83	233044
uni_2087	1493.55	219064
uni_4415	1767.26	223024
uni_8234	1906.49	253688
uni_8243	1585.87	219988
uni_4462	1684.20	221444
uni_6356	1576.53	218232
uni_4838	1908.54	227668
uni_2164	1960.37	228480
uni_4518	1543.53	224324
uni_8339	1467.16	225516
uni_4942	1300.47	210212
uni_4935	1658.21	225196
uni_2069	2256.46	244292
uni_376	1831.21	229216
uni_1142	1763.10	227036
uni_3676	1553.45	215208
uni_9551	1935.22	252368
uni_5370	1512.02	213624
uni_7444	1920.78	225592
uni_7433	1764.09	220608
uni_3795	1572.88	215044
uni_5307	1599.58	216884
uni_295	2178.42	255784
uni_9526	1536.42	218028
uni_3601	2160.02	268436
uni_5293	1514.72	216580
uni_301	2172.40	259892
uni_1135	1754.26	231216
uni_7869	1731.60	222588
uni_7887	1784.04	224612
uni_7549	1746.84	245704
uni_9992	1742.54	235004
uni_7913	1760.20	233136
uni_9806	1750.19	229316
uni_9871	2066.30	238612
uni_1038	1152.33	209024
uni_7964	1374.69	213224
uni_398	2244.53	231048
[truncated: 8,004 more rows]

## Sheet: power iteration vs lapack for 1
file starting with Gn... are simulated graphs, BigCC100_... are the BigCC100 connected components (BigCC100). background is the runtime of loading the data (substracted from total runtime). runtime_s.lapack = lapack runtime in seconds that is corrected for background (allready substracted), same for power iteration. diff = absolute runtime difference of power-lapack. l2fc = log2 fold change of bo…
file	n	runtime_s,background	runtime_s,lapack	runtime_s,power	maxRSS_GB,background	maxRSS_GB,lapack	maxRSS_GB,power	diff	l2fc	l2fc_rss	is lapack better?	is power better?
Gn2022_d0,479,cc	2022	2,5	3,74	53,77	0,021184	0,018652	4,36E-04	50,03	3,845691296	-5,41885839	FALSE	FALSE
Gn2039_d0,789,cc	2039	3,7	4,93	98,41	0,038488	0,018796	4,32E-04	93,48	4,319145372	-5,44325055	FALSE	FALSE
Gn2042_d0,121,cc	2042	0,72	1,47	29,47	0,01676	0,01148	-2,20E-04	28	4,325359	NA	FALSE	FALSE
Gn2059_d0,933,cc	2059	4,37	5,61	170,09	0,03816	0,01928	6,08E-04	164,48	4,922153743	-4,986889918	FALSE	FALSE
Gn2062_d0,142,cc	2062	0,83	1,55	23,64	0,0166	0,014916	2,12E-04	22,09	3,930889915	-6,136652627	FALSE	FALSE
Gn2077_d0,034,cc	2077	0,29	1,14	5,14	0,016392	0,007948	1,60E-04	4	2,172734535	-5,634448062	FALSE	FALSE
Gn2095_d0,247,cc	2095	1,41	2,02	70,15	0,017924	0,01998	8,36E-04	68,13	5,118015906	-4,578909831	FALSE	FALSE
Gn2122_d0,477,cc	2122	2,67	3,94	64,04	0,027228	0,020272	6,20E-04	60,1	4,022705773	-5,031076404	FALSE	FALSE
Gn2134_d0,623,cc	2134	3,22	4,52	75,57	0,037752	0,020496	6,12E-04	71,05	4,063418945	-5,065666918	FALSE	FALSE
Gn2137_d0,976,cc	2137	4,91	6,28	117,7	0,056424	0,020692	4,40E-04	111,42	4,228205951	-5,555425763	FALSE	FALSE
Gn2139_d0,668,cc	2139	3,43	4,75	202,79	0,038996	0,019096	7,68E-04	198,04	5,415915188	-4,63602035	FALSE	FALSE
Gn2165_d0,021,cc	2165	0,25	1,08	4,08	0,016516	0,008592	2,40E-05	3	1,91753784	-8,483815777	FALSE	FALSE
Gn2186_d0,591,cc	2186	3,44	4,82	188,64	0,039124	0,021576	6,16E-04	183,82	5,290458667	-5,130353266	FALSE	FALSE
Gn2206_d0,618,cc	2206	3,42	4,73	256,09	0,039852	0,02174	4,52E-04	251,36	5,758666925	-5,587885357	FALSE	FALSE
Gn2207_d0,619,cc	2207	3,41	4,8	212,77	0,03926	0,021336	4,44E-04	207,97	5,470116533	-5,586586243	FALSE	FALSE
Gn2226_d0,191,cc	2226	1,28	1,86	106,81	0,016608	0,018124	2,00E-05	104,95	5,843600293	-9,823685681	FALSE	FALSE
Gn2226_d0,779,cc	2226	4,38	5,32	146,43	0,041784	0,020324	4,76E-04	141,11	4,782641102	-5,416078985	FALSE	FALSE
Gn2237_d0,881,cc	2237	4,86	8,01	398	0,041652	0,020792	4,80E-04	389,99	5,634822378	-5,436850323	TRUE	FALSE
Gn2251_d0,574,cc	2251	3,57	4,84	82,62	0,040092	0,022392	0,004708	77,78	4,093412108	-2,249797167	FALSE	FALSE
Gn2265_d0,619,cc	2265	3,57	4,94	211,83	0,041168	0,020944	0,002076	206,89	5,422252071	-3,334658654	FALSE	FALSE
Gn2276_d0,971,cc	2276	5,56	7,82	148,42	0,061956	0,021204	0,017496	140,6	4,246373094	-0,2773113202	FALSE	FALSE
Gn2299_d0,892,cc	2299	5,26	7,2	191,22	0,053056	0,022088	0,012024	184,02	4,731092708	-0,8773458787	FALSE	FALSE
Gn2305_d0,664,cc	2305	3,93	8,1	202,19	0,043356	0,023388	0,002396	194,09	4,641645927	-3,287068683	FALSE	FALSE
Gn2305_d0,865,cc	2305	5,25	9,49	107,03	0,04298	0,023868	5,00E-04	97,54	3,495463336	-5,577005777	FALSE	FALSE
Gn2316_d0,931,cc	2316	5,48	7,56	129,49	0,062432	0,022104	0,01824	121,93	4,098310644	-0,2772017378	FALSE	FALSE
Gn2323_d0,872,cc	2323	5,21	9,82	95,19	0,045008	0,023552	0,001936	85,37	3,277015092	-3,604698719	FALSE	FALSE
Gn2356_d0,366,cc	2356	2,56	5,02	66,78	0,023728	0,024424	5,52E-04	61,76	3,733656824	-5,467487417	FALSE	FALSE
Gn2370_d0,862,cc	2370	5,29	7,48	229,38	0,051712	0,02304	0,01026	221,9	4,938557526	-1,167109986	FALSE	FALSE
Gn2400_d0,891,cc	2400	5,67	10,55	217,52	0,06418	0,025184	0,020152	206,97	4,365833152	-0,3215844188	FALSE	FALSE
Gn2412_d0,154,cc	2412	1,19	1,81	48,79	0,016664	0,022512	-1,16E-04	46,98	4,752523881	NA	FALSE	FALSE
Gn2437_d0,823,cc	2437	5,38	10,08	160,48	0,04584	0,024276	6,88E-04	150,4	3,992825967	-5,140978351	FALSE	FALSE
Gn2449_d0,097,cc	2449	0,82	1,53	17,52	0,016796	0,016896	-2,76E-04	15,99	3,517399217	NA	FALSE	FALSE
Gn2463_d0,525,cc	2463	3,91	7,71	119,91	0,043424	0,02662	0,002904	112,2	3,959077308	-3,196397213	FALSE	FALSE
Gn2486_d0,317,cc	2486	2,43	3,84	139,79	0,024804	0,027024	5,08E-04	135,95	5,186011039	-5,733268926	FALSE	FALSE
Gn2512_d0,75,cc	2512	6,55	6,07	102,88	0,047016	0,027564	5,32E-04	96,81	4,083122221	-5,695215207	FALSE	FALSE
Gn2534_d0,233,cc	2534	1,93	4,19	89,32	0,02528	0,027804	5,20E-04	85,13	4,413961102	-5,740637017	FALSE	FALSE
Gn2543_d0,997,cc	2543	7,02	13,4	125	0,073432	0,026188	0,014104	111,6	3,221623189	-0,8928015043	FALSE	FALSE
Gn2558_d0,607,cc	2558	4,43	6,65	116,58	0,047836	0,028396	0,002624	109,93	4,131822156	-3,435848094	FALSE	FALSE
Gn2563_d0,607,cc	2563	4,52	6,6	283,47	0,04814	0,026612	5,44E-04	276,87	5,424586226	-5,612326477	FALSE	FALSE
Gn2579_d0,703,cc	2579	5,15	9,93	282,16	0,048052	0,028872	7,08E-04	272,23	4,828575953	-5,349777878	FALSE	FALSE
Gn2640_d0,399,cc	2640	3,4	7,25	115,55	0,041704	0,030296	0,005104	108,3	3,994392454	-2,569427092	FALSE	FALSE
Gn2668_d0,36,cc	2668	3,18	6,79	89,25	0,02678	0,030416	5,08E-04	82,46	3,71636869	-5,90385813	FALSE	FALSE
Gn2696_d0,591,cc	2696	5,19	6,95	210,9	0,050356	0,031172	5,04E-04	203,95	4,923402307	-5,950683178	FALSE	FALSE
Gn2711_d0,395,cc	2711	4,56	6,32	171,66	0,044724	0,031412	0,00518	165,34	4,763485535	-2,600291799	FALSE	FALSE
Gn2739_d0,385,cc	2739	4,22	4,97	196,95	0,043224	0,03202	0,0049	191,98	5,308439755	-2,708119654	FALSE	FALSE
Gn2740_d0,589,cc	2740	5,39	10,62	370,03	0,051016	0,032048	5,56E-04	359,41	5,12278657	-5,849005633	TRUE	FALSE
Gn2748_d0,599,cc	2748	5,44	10,78	105,15	0,051336	0,030436	5,32E-04	94,37	3,286019767	-5,838208712	FALSE	FALSE
Gn2762_d0,838,cc	2762	7,04	9,82	194,69	0,077112	0,032684	0,001104	184,87	4,309311949	-4,88777248	FALSE	FALSE
Gn2781_d0,007,cc	2781	0,19	1,1	2,05	0,016516	0,0203	2,44E-04	0,95	0,898120386	-6,378454769	FALSE	FALSE
Gn2792_d0,373,cc	2792	3,56	7,36	143,64	0,042252	0,031596	0,004932	136,28	4,286607982	-2,679497222	FALSE	FALSE
Gn2803_d0,113,cc	2803	1,18	2,84	44,8	0,01654	0,032276	2,72E-04	41,96	3,979535897	-6,890711333	FALSE	FALSE
Gn2814_d0,071,cc	2814	0,81	2,84	28,5	0,016712	0,026648	-1,28E-04	25,66	3,326999084	NA	FALSE	FALSE
Gn2847_d0,902,cc	2847	8,25	10,33	230,37	0,084088	0,0345	0,015736	220,04	4,479040694	-1,132527499	FALSE	FALSE
Gn2848_d0,007,cc	2848	0,18	1,12	3,06	0,016592	0,021444	-4,80E-05	1,94	1,450032921	NA	FALSE	FALSE
Gn2873_d0,796,cc	2873	7,19	10,09	235,95	0,080336	0,033268	0,021112	225,86	4,547483092	-0,6560718814	FALSE	FALSE
Gn2926_d0,23,cc	2926	2,49	5,94	99,83	0,02866	0,036804	0,002416	93,89	4,07093859	-3,929170213	FALSE	FALSE
Gn2996_d0,285,cc	2996	3,18	5,38	94,3	0,029492	0,038112	5,32E-04	88,92	4,131579693	-6,162675262	FALSE	FALSE
Gn3022_d0,388,cc	3022	4,38	9,25	119,17	0,051064	0,038588	0,0051	109,92	3,68742392	-2,919583119	FALSE	FALSE
Gn3050_d0,624,cc	3050	6,5	13,34	249,22	0,056768	0,037484	4,64E-04	235,88	4,223589278	-6,336006299	FALSE	FALSE
Gn3074_d0,346,cc	3074	4,14	5,96	244,9	0,049176	0,039736	0,005484	238,94	5,360736633	-2,857146176	FALSE	FALSE
Gn3088_d0,555,cc	3088	8,14	7,27	257,09	0,057084	0,040024	5,80E-04	249,82	5,144174321	-6,108668647	FALSE	FALSE
Gn3141_d0,196,cc	3141	2,41	5,95	98,77	0,030756	0,039632	5,84E-04	92,82	4,053111336	-6,084553594	FALSE	FALSE
Gn3209_d0,163,cc	3209	2,14	4,52	93,52	0,027972	0,041396	5,28E-04	89	4,370880252	-6,29280963	FALSE	FALSE
Gn3238_d0,041,cc	3238	0,64	2,66	17,38	0,01684	0,034756	-2,60E-04	14,72	2,707929931	NA	FALSE	FALSE
Gn3273_d0,823,cc	3273	9,74	12,96	268,03	0,098972	0,044992	0,016292	255,07	4,370256864	-1,46550478	FALSE	FALSE
Gn3278_d0,019,cc	3278	0,37	2,32	13,19	0,016536	0,032616	2,68E-04	10,87	2,507247854	-6,927203051	FALSE	FALSE
Gn3290_d0,719,cc	3290	8,6	11,94	167,01	0,092896	0,043808	0,023324	155,07	3,806059747	-0,9093791238	FALSE	FALSE
Gn3309_d0,014,cc	3309	0,3	2,26	18,15	0,016804	0,03384	-1,80E-04	15,89	3,00557487	NA	FALSE	FALSE
Gn3312_d0,711,cc	3312	9,87	10,81	420,77	0,09358	0,04564	0,024956	409,96	5,282593419	-0,8709120771	TRUE	FALSE
Gn3313_d0,886,cc	3313	10,67	21,14	367,82	0,104684	0,045792	0,01196	346,68	4,120952646	-1,936878188	TRUE	FALSE
Gn3339_d0,852,cc	3339	11,9	19,69	265,09	0,104228	0,046484	0,013372	245,4	3,750947232	-1,79751896	FALSE	FALSE
Gn3387_d0,445,cc	3387	6,2	13,76	206,82	0,06184	0,046388	0,001068	193,06	3,909823329	-5,440768094	FALSE	FALSE
Gn3395_d0,713,cc	3395	9,05	12,49	507,56	0,098132	0,04662	0,02262	495,07	5,344732995	-1,043350075	TRUE	FALSE
Gn3406_d0,606,cc	3406	9,84	14,15	176,3	0,081052	0,048188	0,02184	162,15	3,639158516	-1,141701068	FALSE	FALSE
Gn3407_d0,983,cc	3407	12,56	16,19	352,41	0,113868	0,048228	0,004512	336,22	4,444079972	-3,41803201	TRUE	FALSE
Gn3448_d0,594,cc	3448	8,59	12,28	492,61	0,085424	0,049736	0,012688	480,33	5,326063449	-1,970825808	TRUE	FALSE
Gn3485_d0,756,cc	3485	10,1	14,51	465,28	0,104528	0,050528	0,018788	450,77	5,00297975	-1,427271578	TRUE	FALSE
Gn3506_d0,168,cc	3506	2,67	4,77	109,78	0,03398	0,049368	5,72E-04	105,01	4,524482168	-6,431417242	FALSE	FALSE
Gn3526_d0,555,cc	3526	8,43	12,33	275,2	0,065048	0,049928	5,68E-04	262,87	4,480235765	-6,457814377	FALSE	FALSE
Gn3592_d0,09,cc	3592	1,55	4,03	70,04	0,018852	0,051796	0,002436	66,01	4,11932734	-4,41025465	FALSE	FALSE
Gn3593_d0,017,cc	3593	0,4	2,2	16,34	0,016808	0,042892	-2,08E-04	14,14	2,892832555	NA	FALSE	FALSE
Gn3597_d0,949,cc	3597	13,54	18	722,88	0,12182	0,052248	0,005664	704,88	5,327687364	-3,205482643	TRUE	FALSE
Gn3643_d0,139,cc	3643	2,35	4,67	109,76	0,02648	0,053832	9,56E-04	105,09	4,554786026	-5,815309598	FALSE	FALSE
Gn3643_d0,871,cc	3643	12,69	17,64	377,66	0,119756	0,055236	0,00848	360,02	4,420165522	-2,703472678	TRUE	FALSE
Gn3658_d0,052,cc	3658	0,98	3,66	46,61	0,01664	0,049844	2,20E-04	42,95	3,670723959	-7,823772516	FALSE	FALSE
Gn3658_d0,776,cc	3658	11,51	15,29	201,27	0,11356	0,053892	0,017236	185,98	3,718471838	-1,644646124	FALSE	FALSE
Gn3659_d0,117,cc	3659	2,03	4,43	122,35	0,019424	0,055592	6,00E-04	117,92	4,787563592	-6,533770975	FALSE	FALSE
Gn3723_d0,865,cc	3723	13,15	18,17	382,86	0,12328	0,057452	0,007772	364,69	4,397186615	-2,88599931	TRUE	FALSE
Gn3753_d0,339,cc	3753	5,94	9,33	312,05	0,064512	0,056576	7,32E-04	302,72	5,06375632	-6,272202721	TRUE	FALSE
Gn3787_d0,321,cc	3787	5,65	9,31	314,32	0,064308	0,059356	5,88E-04	305,01	5,077309095	-6,657433907	TRUE	FALSE
Gn3823_d0,097,cc	3823	1,85	4,34	103,82	0,020164	0,060012	6,32E-04	99,48	4,58024554	-6,569182642	FALSE	FALSE
Gn3864_d0,458,cc	3864	8,42	13,22	219,24	0,070608	0,05944	0,002236	206,02	4,051716958	-4,732442023	FALSE	FALSE
Gn3888_d0,628,cc	3888	10,62	15,54	284,28	0,111604	0,06092	9,48E-04	268,74	4,193254196	-6,005885072	FALSE	FALSE
Gn3905_d0,914,cc	3905	15,49	20,8	547,18	0,135848	0,062632	5,80E-04	526,38	4,717360066	-6,754703238	TRUE	FALSE
Gn3912_d0,714,cc	3912	12,24	17,22	539,64	0,120436	0,062728	5,72E-04	522,42	4,969840242	-6,776950608	TRUE	FALSE
Gn3960_d0,027,cc	3960	0,68	3,37	45,61	0,016816	0,053632	2,40E-05	42,24	3,758529674	-11,12584393	FALSE	FALSE
Gn3989_d0,495,cc	3989	9,69	13,91	580,24	0,073948	0,065888	0,003056	566,33	5,382455429	-4,430299287	TRUE	FALSE
Gn3998_d0,976,cc	3998	17,47	22,34	887,57	0,139188	0,06404	6,04E-04	865,23	5,312159814	-6,728280948	TRUE	FALSE
Gn4006_d0,541,cc	4006	10,74	15,5	670,28	0,119228	0,064612	5,56E-04	654,78	5,434423766	-6,86057344	TRUE	FALSE
Gn4006_d0,94,cc	4006	16,24	22,76	943,8	0,139416	0,064392	6,32E-04	921,04	5,373908709	-6,670813092	TRUE	FALSE
Gn4047_d0,518,cc	4047	10,21	15,6	1129,65	0,116	0,067004	0,02382	1114,05	6,178186012	-1,492073811	TRUE	FALSE
Gn4066_d0,824,cc	4066	14,79	20,85	643,18	0,137852	0,065828	0,005512	622,33	4,947103257	-3,578053573	TRUE	FALSE
Gn4086_d0,29,cc	4086	6,07	10,42	198,25	0,06888	0,068508	0,006644	187,83	4,249893683	-3,36614849	FALSE	FALSE
Gn4109_d0,534,cc	4109	11,15	16,36	466,02	0,122484	0,069164	8,36E-04	449,66	4,832147218	-6,370374555	TRUE	FALSE
Gn4130_d0,971,cc	4130	18,04	24,53	1314,77	0,143324	0,07022	9,24E-04	1290,24	5,744119399	-6,247845334	TRUE	FALSE
Gn4133_d0,564,cc	4133	11,63	17,92	608,66	0,125464	0,068256	7,32E-04	590,74	5,085994015	-6,542968412	TRUE	FALSE
Gn4133_d0,68,cc	4133	12,91	18,89	297,94	0,128556	0,068392	7,68E-04	279,05	3,979327219	-6,476577458	FALSE	FALSE
Gn4156_d0,587,cc	4156	12,65	18,35	344,63	0,128336	0,069028	7,52E-04	326,28	4,231196325	-6,520305212	TRUE	FALSE
Gn4165_d0,782,cc	4165	15,31	19,81	539,51	0,139116	0,070936	7,96E-04	519,7	4,767348915	-6,47760574	TRUE	FALSE
Gn4179_d0,087,cc	4179	2	5,41	124,09	0,021784	0,071748	8,68E-04	118,68	4,519614454	-6,369099764	FALSE	FALSE
Gn4188_d0,396,cc	4188	8,46	13,33	368,51	0,076328	0,07028	8,00E-04	355,18	4,788955084	-6,456970381	TRUE	FALSE
Gn4194_d0,804,cc	4194	15,72	22,04	604,4	0,14252	0,070304	0,00694	582,36	4,777307531	-3,340599207	TRUE	FALSE
Gn4199_d0,456,cc	4199	9,91	15,42	573,62	0,076592	0,070548	7,72E-04	558,2	5,217220656	-6,513860526	TRUE	FALSE
Gn4222_d0,367,cc	4222	8,19	12,97	566,87	0,077156	0,072744	7,68E-04	553,9	5,449767536	-6,565578137	TRUE	FALSE
Gn4233_d0,168,cc	4233	3,78	7,71	155,74	0,040416	0,071712	8,24E-04	148,03	4,336264861	-6,443426406	FALSE	FALSE
Gn4236_d0,461,cc	4236	10,38	15,06	318,61	0,077	0,073428	9,08E-04	303,55	4,402997873	-6,337494197	TRUE	FALSE
Gn4236_d0,798,cc	4236	15,95	22,45	1195,82	0,144512	0,071836	0,005076	1173,37	5,73514099	-3,822943045	TRUE	FALSE
Gn4241_d0,949,cc	4241	18,55	25,27	1352,7	0,147852	0,071932	8,32E-04	1327,43	5,742272441	-6,433906379	TRUE	FALSE
Gn4263_d0,926,cc	4263	18,31	25,74	609,2	0,148812	0,07438	9,16E-04	583,46	4,564831983	-6,343423339	TRUE	FALSE
Gn4267_d0,385,cc	4267	8,69	14,44	211,52	0,077812	0,07274	8,12E-04	197,08	3,872651435	-6,485125388	FALSE	FALSE
Gn4278_d0,46,cc	4278	10,17	15,52	416,14	0,0792	0,0732	0,001288	400,62	4,744868506	-5,82863915	TRUE	FALSE
Gn4307_d0,697,cc	4307	14,57	29,57	455,04	0,13794	0,07614	0,014384	425,47	3,943787221	-2,404189644	TRUE	FALSE
Gn4342_d0,476,cc	4342	11,38	16,95	319,52	0,114512	0,074956	8,12E-04	302,57	4,236549059	-6,528420429	TRUE	FALSE
Gn4343_d0,405,cc	4343	9,39	15,02	298,08	0,078792	0,076888	0,001088	283,06	4,310742861	-6,143007991	FALSE	FALSE
Gn4363_d0,647,cc	4363	13,59	20,24	392,82	0,136244	0,077776	9,68E-04	372,58	4,27858719	-6,328174182	TRUE	FALSE
Gn4383_d0,353,cc	4383	8,43	14,09	593,61	0,079184	0,076584	0,001012	579,52	5,396771879	-6,241761819	TRUE	FALSE
Gn4388_d0,114,cc	4388	2,75	9,39	233,82	0,029636	0,078364	8,80E-04	224,43	4,638129369	-6,476543706	FALSE	FALSE
Gn4421_d0,627,cc	4421	13,62	28,69	361,22	0,135892	0,080072	8,08E-04	332,53	3,654257901	-6,630798738	TRUE	FALSE
Gn4431_d0,835,cc	4431	18,41	24,41	890,38	0,155476	0,078288	8,32E-04	865,97	5,188876987	-6,556063849	TRUE	FALSE
Gn4464_d0,925,cc	4464	20,24	40,01	1584,79	0,210032	0,081092	0,084924	1544,78	5,307787243	0,06661273041	TRUE	FALSE
Gn4481_d0,573,cc	4481	14,11	21,91	983,28	0,1399	0,08034	0,020176	961,37	5,487940909	-1,993478281	TRUE	FALSE
Gn4482_d0,991,cc	4482	27,58	36,92	794,38	0,222	0,081824	0,076184	757,46	4,427354843	-0,1030360279	TRUE	FALSE
Gn4493_d0,918,cc	4493	21,96	25,47	1174,11	0,208864	0,086268	0,082776	1148,64	5,526624808	-0,05961297491	TRUE	FALSE
Gn4507_d0,154,cc	4507	3,85	11,91	159,14	0,042864	0,08094	9,00E-04	147,23	3,740051186	-6,490784037	FALSE	FALSE
Gn4526_d0,572,cc	4526	14,31	21,86	469,84	0,14242	0,081712	0,01986	447,98	4,425804237	-2,040682341	TRUE	FALSE
Gn4532_d0,858,cc	4532	19,14	26,95	423,63	0,15856	0,08372	0,001236	396,68	3,974447581	-6,081821663	TRUE	FALSE
Gn4570_d0,265,cc	4570	6,94	12,18	484,6	0,07672	0,084988	9,64E-04	472,42	5,314208366	-6,462082196	TRUE	FALSE
Gn4593_d0,55,cc	4593	14,42	21,37	666,32	0,14256	0,085876	0,02306	644,95	4,962556385	-1,896862481	TRUE	FALSE
Gn4598_d0,247,cc	4598	6,45	16,77	618,68	0,075984	0,084116	0,008404	601,91	5,205238803	-3,32323218	TRUE	FALSE
Gn4602_d0,044,cc	4602	1,25	6,44	160,2	0,016712	0,081344	-1,56E-04	153,76	4,636669649	NA	FALSE	FALSE
Gn4663_d0,697,cc	4663	16,71	34,97	442,21	0,156044	0,088988	0,009596	407,24	3,660541949	-3,21310574	TRUE	FALSE
Gn4665_d0,73,cc	4665	17,65	25,42	412,28	0,160152	0,08682	0,005076	386,86	4,019588541	-4,096263448	TRUE	FALSE
Gn4706_d0,83,cc	4706	20,39	28,78	981,18	0,165172	0,089844	8,60E-04	952,4	5,09137933	-6,70694169	TRUE	FALSE
Gn4734_d0,11,cc	4734	3,2	8,2	175,12	0,03918	0,089356	9,20E-04	166,92	4,41657614	-6,601786934	FALSE	FALSE
Gn4757_d0,899,cc	4757	22,66	31,77	1036,77	0,231408	0,090168	0,003704	1005	5,028286978	-4,605459518	TRUE	FALSE
Gn4762_d0,313,cc	4762	8,88	15,39	514,25	0,08576	0,09178	8,04E-04	498,86	5,062404752	-6,834840495	TRUE	FALSE
Gn4791_d0,986,cc	4791	24,57	34,95	1204,12	0,24666	0,091548	0,07546	1169,17	5,106542909	-0,2788162684	TRUE	FALSE
Gn4828_d0,161,cc	4828	4,79	13,49	200,31	0,04578	0,09292	0,00244	186,82	3,892272193	-5,251036101	FALSE	FALSE
Gn4839_d0,956,cc	4839	24,81	34,01	1238,02	0,246608	0,093384	0,07856	1204,01	5,185931805	-0,2493804565	TRUE	FALSE
Gn4867_d0,217,cc	4867	6,46	12,56	328,5	0,074724	0,096136	0,010808	315,94	4,708985001	-3,152977198	TRUE	FALSE
Gn4911_d0,914,cc	4911	24,18	34,83	478,39	0,24608	0,097592	0,059392	443,56	3,779784855	-0,7164942737	TRUE	FALSE
Gn4916_d0,592,cc	4916	17,64	27,46	502,56	0,16064	0,098596	0,01486	475,1	4,193892318	-2,730095002	TRUE	FALSE
Gn4916_d0,667,cc	4916	18,06	26,93	682,65	0,165216	0,096252	8,84E-04	655,72	4,663859952	-6,766626339	TRUE	FALSE
Gn4947_d0,302,cc	4947	9,22	16,57	347,68	0,089276	0,097864	0,00172	331,11	4,391114572	-5,830297781	TRUE	FALSE
Gn4966_d0,078,cc	4966	2,47	7,71	112,14	0,025352	0,099964	9,44E-04	104,43	3,862426305	-6,726477961	FALSE	FALSE
Gn4967_d0,786,cc	4967	21,45	31,19	452,19	0,175044	0,09822	8,88E-04	421	3,85777363	-6,789313336	TRUE	FALSE
Gn4993_d0,153,cc	4993	4,74	11,57	469,44	0,046932	0,099688	0,001044	457,87	5,342480007	-6,577226233	TRUE	FALSE
Gn4997_d0,424,cc	4997	13,14	21,91	987,52	0,144744	0,099352	8,16E-04	965,61	5,494148578	-6,927836047	TRUE	FALSE
Gn4998_d0,306,cc	4998	9,32	17,2	516,96	0,090208	0,099328	0,001168	499,76	4,909572186	-6,410088283	TRUE	FALSE
Gn5034_d0,728,cc	5034	20,05	29,54	1277,46	0,177572	0,1027	8,88E-04	1247,92	5,434464482	-6,85366079	TRUE	FALSE
Gn5073_d0,988,cc	5073	28,15	37,08	1247,03	0,269732	0,107728	0,069416	1209,95	5,071711119	-0,6340531357	TRUE	FALSE
Gn5086_d0,616,cc	5086	17,28	38,22	822,47	0,167468	0,103016	8,52E-04	784,25	4,427563373	-6,917799282	TRUE	FALSE
Gn5099_d0,388,cc	5099	12,42	29,2	1040,79	0,09538	0,103436	9,36E-04	1011,59	5,155566826	-6,788014145	TRUE	FALSE
Gn5107_d0,314,cc	5107	10,24	18,47	404,47	0,092948	0,10384	8,84E-04	386	4,452776929	-6,876100203	TRUE	FALSE
Gn5121_d0,169,cc	5121	5,6	17,51	454,96	0,048296	0,106096	9,24E-04	437,45	4,699488721	-6,843261698	TRUE	FALSE
Gn5138_d0,564,cc	5138	17,94	40,48	601,14	0,167144	0,107236	0,015528	560,66	3,892419825	-2,787845383	TRUE	FALSE
Gn5156_d0,521,cc	5156	16,65	36,92	1363,38	0,162916	0,10578	8,36E-04	1326,46	5,206641362	-6,983348223	TRUE	FALSE
Gn5163_d0,018,cc	5163	0,69	7,76	62,79	0,016516	0,100332	9,60E-05	55,03	3,016406255	-10,02945979	FALSE	FALSE
Gn5197_d0,344,cc	5197	14,07	16,68	498,75	0,094004	0,107448	9,16E-04	482,07	4,902125647	-6,874075316	TRUE	FALSE
Gn5211_d0,682,cc	5211	20,15	31,02	1294,76	0,183096	0,107784	0,001672	1263,74	5,383342204	-6,010424375	TRUE	FALSE
Gn5240_d0,151,cc	5240	5,14	11,89	258,08	0,049372	0,110788	0,0028	246,19	4,439997723	-5,306230987	FALSE	FALSE
Gn5242_d0,361,cc	5242	12,19	20,95	730,87	0,094972	0,11126	9,20E-04	709,92	5,124592667	-6,918085434	TRUE	FALSE
Gn5242_d0,859,cc	5242	25,95	36,08	1180,73	0,263524	0,111444	7,64E-04	1144,65	5,03233595	-7,188530592	TRUE	FALSE
Gn5251_d0,238,cc	5251	8,09	16,08	611,25	0,089172	0,109476	9,40E-04	595,17	5,248423248	-6,863738156	TRUE	FALSE
Gn5282_d0,455,cc	5282	15,84	25,89	1661,82	0,161664	0,112348	8,64E-04	1635,93	6,00422535	-7,022727414	TRUE	FALSE
Gn5292_d0,151,cc	5292	5,36	12,94	741,75	0,049856	0,112804	0,002144	728,81	5,841023499	-5,71736951	TRUE	FALSE
Gn5332_d0,151,cc	5332	5,45	12,81	238,51	0,050092	0,114612	9,56E-04	225,7	4,218707375	-6,90553177	FALSE	FALSE
Gn5422_d0,802,cc	5422	26,18	36,92	1086,42	0,266104	0,117104	8,80E-04	1049,5	4,87903558	-7,056071117	TRUE	FALSE
Gn5427_d0,115,cc	5427	4,23	12,11	267,12	0,051176	0,118124	0,002452	255,01	4,463217228	-5,590199327	FALSE	FALSE
Gn5454_d0,748,cc	5454	24,63	36,14	1550,48	0,214592	0,120296	0,039612	1514,34	5,4229746	-1,602579222	TRUE	FALSE
Gn5575_d0,646,cc	5575	22,4	34,45	1205,86	0,19604	0,124868	0,001256	1171,41	5,129414627	-6,63542353	TRUE	FALSE
Gn5588_d0,475,cc	5588	18,44	29,52	1040,98	0,176092	0,124304	0,024068	1011,46	5,140105819	-2,368684555	TRUE	FALSE
Gn5592_d0,277,cc	5592	10,72	21,03	894,9	0,101144	0,124268	0,001148	873,87	5,411205723	-6,758188387	TRUE	FALSE
Gn5602_d0,649,cc	5602	22,42	34,74	900,49	0,19758	0,124504	0,001012	865,75	4,696040596	-6,942838993	TRUE	FALSE
Gn5607_d0,511,cc	5607	19,96	44,89	941,42	0,182072	0,12484	0,017376	896,53	4,390372501	-2,844912349	TRUE	FALSE
Gn5624_d0,534,cc	5624	21,01	33,52	1028,12	0,185036	0,127424	0,014304	994,6	4,938842703	-3,155146485	TRUE	FALSE
Gn5626_d0,948,cc	5626	33,49	45,41	844,7	0,311156	0,12774	0,068328	799,29	4,217357109	-0,9026615516	TRUE	FALSE
Gn5628_d0,28,cc	5628	10,81	21,01	748,24	0,101552	0,125652	9,72E-04	727,23	5,154353026	-7,014261606	TRUE	FALSE
Gn5631_d0,344,cc	5631	13,52	25,38	876,72	0,101712	0,128056	0,002576	851,34	5,110352185	-5,635498448	TRUE	FALSE
Gn5642_d0,693,cc	5642	24,55	37,51	739,42	0,198432	0,126488	7,88E-04	701,91	4,301046898	-7,326589177	TRUE	FALSE
Gn5672_d0,609,cc	5672	21,78	33,13	768,59	0,197184	0,129192	0,004636	735,46	4,536004097	-4,80049236	TRUE	FALSE
Gn5718_d0,898,cc	5718	32,36	45,64	2217,72	0,31052	0,130268	0,0778	2172,08	5,602634627	-0,7436406728	TRUE	FALSE
Gn5739_d0,549,cc	5739	22,52	49,73	1135,21	0,193144	0,130724	0,01126	1085,48	4,512698962	-3,537245302	TRUE	FALSE
Gn5777_d0,405,cc	5777	16,85	39,22	653,02	0,174132	0,132508	0,03082	613,8	4,057465737	-2,104140696	TRUE	FALSE
Gn5831_d0,911,cc	5831	34,74	68,99	2085,99	0,323176	0,135228	8,32E-04	2017	4,918201171	-7,34459466	TRUE	FALSE
Gn5858_d0,1,cc	5858	4,34	17,23	528,35	0,054952	0,138228	8,88E-04	511,12	4,938499338	-7,282274491	TRUE	FALSE
Gn5865_d0,75,cc	5865	28,79	59,06	732,85	0,29202	0,137968	0,109264	673,79	3,633264676	-0,3365155461	TRUE	FALSE
Gn5876_d0,693,cc	5876	26,68	56,44	1446,83	0,2295	0,139076	9,96E-04	1390,39	4,68003362	-7,125512021	TRUE	FALSE
Gn5881_d0,382,cc	5881	16,49	39,78	971,63	0,175508	0,137496	0,03382	931,85	4,610291854	-2,023441084	TRUE	FALSE
Gn5886_d0,657,cc	5886	24,73	54,35	834,87	0,20748	0,141376	0,002396	780,52	3,941199629	-5,882765511	TRUE	FALSE
Gn5894_d0,67,cc	5894	25,84	55,68	1065,86	0,207652	0,137896	9,76E-04	1010,18	4,258714932	-7,142483746	TRUE	FALSE
Gn5913_d0,118,cc	5913	5,28	19,07	631,76	0,05542	0,138876	8,84E-04	612,69	5,049999847	-7,295535215	TRUE	FALSE
Gn5925_d0,872,cc	5925	33,25	69,89	622,05	0,3232	0,13956	0,080136	552,16	3,153872596	-0,8003630983	TRUE	FALSE
Gn5961_d0,773,cc	5961	31,01	63,32	1158,86	0,30378	0,140916	8,48E-04	1095,54	4,193901222	-7,376555448	TRUE	FALSE
Gn5977_d0,981,cc	5977	37,84	77,86	1087,6	0,347256	0,145596	0,057252	1009,74	3,804121902	-1,346572723	TRUE	FALSE
Gn5986_d0,389,cc	5986	17,21	31,02	828,79	0,180256	0,143748	0,031988	797,77	4,739736004	-2,167939186	TRUE	FALSE
Gn6026_d0,798,cc	6026	32,11	66,36	608,32	0,316372	0,144072	0,073212	541,96	3,196444646	-0,9766379373	TRUE	FALSE
Gn6085_d0,485,cc	6085	22,46	50,38	1175,23	0,199272	0,146756	0,016716	1124,85	4,543948197	-3,134117919	TRUE	FALSE
Gn6116_d0,195,cc	6116	9,07	26,99	672,55	0,1016	0,149484	8,76E-04	645,56	4,639144645	-7,414844489	TRUE	FALSE
Gn6121_d0,842,cc	6121	34,68	71,74	1684,26	0,333432	0,14852	8,72E-04	1612,52	4,55319331	-7,41211337	TRUE	FALSE
Gn6132_d0,308,cc	6132	14,22	27,52	739,11	0,110612	0,149304	0,001048	711,59	4,747236718	-7,15447029	TRUE	FALSE
Gn6132_d0,591,cc	6132	27,74	61,6	3425,4	0,216348	0,149148	0,002984	3363,8	5,797198307	-5,643353286	TRUE	FALSE
Gn6133_d0,776,cc	6133	32,54	66,75	2189,74	0,319948	0,149072	0,061064	2122,99	5,035847934	-1,287615302	TRUE	FALSE
Gn6137_d0,382,cc	6137	19,55	41,83	1004,22	0,18546	0,149412	0,03322	962,39	4,585393555	-2,169172044	TRUE	FALSE
Gn6141_d0,227,cc	6141	10,44	23,01	489,76	0,10726	0,149828	9,00E-04	466,75	4,411742061	-7,379166544	TRUE	FALSE
Gn6155_d0,149,cc	6155	8,87	21,71	444,92	0,057572	0,151768	0,00108	423,21	4,357114321	-7,134692511	TRUE	FALSE
Gn6167_d0,473,cc	6167	21,72	52,27	1192,7	0,20124	0,152844	8,08E-04	1140,43	4,512104238	-7,563488911	TRUE	FALSE
Gn6180_d0,864,cc	6180	35,96	75,18	954,68	0,344144	0,151472	0,079368	879,5	3,666596416	-0,9324217759	TRUE	FALSE
Gn6208_d0,945,cc	6208	40,35	56,32	1135,08	0,3637	0,153224	9,04E-04	1078,76	4,333002837	-7,405103801	TRUE	FALSE
Gn6215_d0,814,cc	6215	34,65	72,5	2099,17	0,33548	0,153204	0,090332	2026,67	4,855694202	-0,7621449087	TRUE	FALSE
Gn6216_d0,64,cc	6216	27,28	44,32	1365,9	0,219376	0,153232	8,36E-04	1321,58	4,945750174	-7,517998954	TRUE	FALSE
Gn6250_d0,75,cc	6250	32,78	68,12	1093,18	0,321924	0,156332	0,10492	1025,06	4,004308726	-0,5753234048	TRUE	FALSE
Gn6254_d0,82,cc	6254	34,48	53,67	1313,45	0,340456	0,155052	0,086728	1259,78	4,613101583	-0,8381823896	TRUE	FALSE
Gn6266_d0,735,cc	6266	40,06	59,59	1293,23	0,320124	0,157596	0,108792	1233,64	4,439764823	-0,5346584455	TRUE	FALSE
Gn6316_d0,682,cc	6316	29,81	46,89	900,14	0,308868	0,159508	0,123344	853,25	4,262797219	-0,3709412448	TRUE	FALSE
Gn6398_d0,666,cc	6398	29,59	65,97	1892,25	0,310652	0,162376	0,093228	1826,28	4,842148792	-0,800503188	TRUE	FALSE
Gn6424_d0,959,cc	6424	43,34	88,5	2009,81	0,385568	0,165284	0,051768	1921,31	4,505237855	-1,674814587	TRUE	FALSE
Gn6436_d0,632,cc	6436	28,4	48,16	1561,58	0,25	0,165364	8,68E-04	1513,42	5,019027278	-7,573734434	TRUE	FALSE
Gn6456_d0,712,cc	6456	33,02	49,99	1895,37	0,32936	0,167316	0,113836	1845,38	5,244696171	-0,5556185391	TRUE	FALSE
Gn6482_d0,418,cc	6482	21,52	38,92	920,8	0,20604	0,167776	0,024744	881,88	4,564304218	-2,761385712	TRUE	FALSE
Gn6524_d0,782,cc	6524	36,72	53,83	1594,14	0,35408	0,178732	9,76E-04	1540,31	4,888224099	-7,516701093	TRUE	FALSE
Gn6526_d0,126,cc	6526	6,66	19,11	434,28	0,060868	0,170064	9,96E-04	415,17	4,50622583	-7,415716319	TRUE	FALSE
Gn6617_d0,776,cc	6617	37,84	54,84	1855,21	0,360616	0,173356	0,093496	1800,37	5,08021012	-0,8907612211	TRUE	FALSE
Gn6650_d0,998,cc	6650	48,88	97,3	1938,82	0,412116	0,1754	0,034656	1841,52	4,316595255	-2,339471695	TRUE	FALSE
Gn6737_d0,631,cc	6737	31,11	50,15	3497,42	0,326288	0,179812	0,133696	3447,27	6,123897546	-0,4275330017	TRUE	FALSE
Gn6763_d0,067,cc	6763	3,96	16,83	191,71	0,033652	0,181088	0,001124	174,88	3,509818511	-7,331905102	FALSE	FALSE
Gn6779_d0,219,cc	6779	12,67	28,34	961,54	0,12074	0,183244	0,001012	933,2	5,084435211	-7,50041286	TRUE	FALSE
Gn6865_d0,221,cc	6865	12,66	28,89	1006,14	0,122904	0,18802	0,00146	977,25	5,12211705	-7,008773953	TRUE	FALSE
Gn6870_d0,825,cc	6870	54,33	78,81	1348,3	0,39564	0,18816	0,075376	1269,49	4,096619024	-1,319782823	TRUE	FALSE
Gn6871_d0,202,cc	6871	12,1	36,07	545,42	0,119376	0,188244	0,005268	509,35	3,918496275	-5,159204726	TRUE	FALSE
Gn6892_d0,487,cc	6892	36,03	61,26	1351,26	0,236892	0,188032	0,008968	1290	4,463216118	-4,390048118	TRUE	FALSE
Gn6905_d0,224,cc	6905	13,46	38,7	591,84	0,12388	0,188844	0,001224	553,14	3,934801734	-7,269447579	TRUE	FALSE
Gn6952_d0,02,cc	6952	1,34	16,48	94,11	0,018208	0,192668	0,001176	77,63	2,513631787	-7,356085106	FALSE	FALSE
Gn6966_d0,976,cc	6966	51,89	106,76	3832,14	0,441468	0,196264	0,0311	3725,38	5,165707152	-2,657809083	TRUE	FALSE
Gn6981_d0,883,cc	6981	47,37	70,96	1301,03	0,42072	0,192944	0,055396	1230,07	4,196504409	-1,800328469	TRUE	FALSE
Gn6985_d0,011,cc	6985	0,81	15,8	54,79	0,016596	0,189204	2,00E-04	38,99	1,793988045	-9,885726874	FALSE	FALSE
Gn6989_d0,294,cc	6989	18,07	48,47	1702,45	0,175336	0,194648	9,72E-04	1653,98	5,134376535	-7,645695492	TRUE	FALSE
Gn6999_d0,446,cc	6999	27,59	64,84	1945,59	0,233512	0,195896	9,84E-04	1880,75	4,907179818	-7,637213909	TRUE	FALSE
Gn7037_d0,663,cc	7037	36,31	80,84	1210,68	0,362688	0,197888	0,12024	1129,84	3,904604459	-0,7187672151	TRUE	FALSE
Gn7055_d0,668,cc	7055	37,09	80,58	1956,14	0,372496	0,190264	0,111616	1875,56	4,601444011	-0,7694587636	TRUE	FALSE
Gn7070_d0,345,cc	7070	21,56	55,56	771,94	0,215496	0,199512	0,001024	716,38	3,796370212	-7,606115997	TRUE	FALSE
Gn7083_d0,097,cc	7083	6,26	26,2	581,95	0,065568	0,200092	0,00112	555,75	4,473256488	-7,481020945	TRUE	FALSE
Gn7083_d0,319,cc	7083	19,92	53,2	1413,68	0,210648	0,200132	0,039876	1360,48	4,731885533	-2,327359261	TRUE	FALSE
Gn7086_d0,705,cc	7086	39,49	87,33	2031,74	0,380248	0,198812	0,10576	1944,41	4,540094643	-0,9106107565	TRUE	FALSE
Gn7086_d0,773,cc	7086	43,31	91,76	1659,39	0,400708	0,19868	0,08388	1567,63	4,176643796	-1,244047885	TRUE	FALSE
Gn7096_d0,561,cc	7096	34,96	58,07	1382,74	0,253636	0,200364	0,002376	1324,67	4,573593064	-6,397944672	TRUE	FALSE
Gn7100_d0,472,cc	7100	29,87	49,95	2030,74	0,24408	0,20074	0,00798	1980,79	5,345377052	-4,652795564	TRUE	FALSE
Gn7121_d0,359,cc	7121	22,23	43,6	1685,74	0,220688	0,20232	0,033496	1642,14	5,272910094	-2,594578214	TRUE	FALSE
Gn7142_d0,827,cc	7142	46,82	71,59	2265,55	0,42178	0,20184	0,067456	2193,96	4,983959441	-1,581193434	TRUE	FALSE
Gn7146_d0,144,cc	7146	9,44	25,49	1450,31	0,096312	0,203804	0,001104	1424,82	5,830286122	-7,528298385	TRUE	FALSE
Gn7208_d0,773,cc	7208	44,63	68,18	3843,53	0,411928	0,205748	0,082108	3775,35	5,81693952	-1,325283707	TRUE	FALSE
Gn7290_d0,271,cc	7290	18,06	38,26	1561,06	0,135292	0,211812	0,003152	1522,8	5,350545305	-6,070372981	TRUE	FALSE
Gn7368_d0,822,cc	7368	48,54	73,48	1415,96	0,4413	0,217008	0,016496	1342,48	4,268285074	-3,717560086	TRUE	FALSE
Gn7394_d0,35,cc	7394	23,63	61,44	1178,75	0,230516	0,218444	0,03334	1117,31	4,261935745	-2,71193747	TRUE	FALSE
Gn7401_d0,605,cc	7401	36,58	60,11	1296,56	0,3716	0,233444	0,136152	1236,45	4,43094014	-0,7778583338	TRUE	FALSE
Gn7408_d0,753,cc	7408	45,27	70,87	1742,22	0,4236	0,21848	9,88E-04	1671,35	4,619607953	-7,788774462	TRUE	FALSE
Gn7415_d0,125,cc	7415	8,6	26,45	535,63	0,068584	0,218572	0,001128	509,18	4,339897139	-7,59819772	TRUE	FALSE
Gn7440_d0,238,cc	7440	17,2	36,23	688,38	0,133608	0,220352	0,001104	652,15	4,247948471	-7,640926009	TRUE	FALSE
Gn7465_d0,466,cc	7465	41,03	60,62	1456,25	0,260684	0,222004	0,00404	1395,63	4,586320387	-5,780086568	TRUE	FALSE
Gn7472_d0,226,cc	7472	15,55	44,8	950,25	0,13362	0,220784	0,00112	905,45	4,406736483	-7,622993083	TRUE	FALSE
Gn7478_d0,184,cc	7478	12,69	32,36	1975,07	0,129248	0,221012	0,006096	1942,71	5,931548368	-5,180117991	TRUE	FALSE
Gn7498_d0,907,cc	7498	70,78	69,71	2317,79	0,477944	0,22476	0,001068	2248,08	5,055240421	-7,717329848	TRUE	FALSE
Gn7505_d0,314,cc	7505	21,84	44,3	2842,24	0,226556	0,224684	0,039436	2797,94	6,003577873	-2,510312261	TRUE	FALSE
Gn7508_d0,727,cc	7508	44,77	70,18	2623,04	0,424036	0,224752	0,001196	2552,86	5,22403605	-7,553972754	TRUE	FALSE
Gn7518_d0,551,cc	7518	43,52	59,98	2888,14	0,392836	0,224988	0,097004	2828,16	5,589515345	-1,213731912	TRUE	FALSE
Gn7521_d0,096,cc	7521	6,81	25,45	503,59	0,069752	0,22368	0,001148	478,14	4,306512074	-7,606169814	TRUE	FALSE
Gn7525_d0,665,cc	7525	41,9	65,53	1367,4	0,404048	0,228188	0,11396	1301,87	4,383135988	-1,001695398	TRUE	FALSE
Gn7534_d0,581,cc	7534	41,2	72,98	1736,56	0,4224	0,2259	0,001048	1663,58	4,572587297	-7,751901744	TRUE	FALSE
Gn7537_d0,056,cc	7537	4,16	20,82	374,06	0,037112	0,224572	0,001196	353,24	4,167227726	-7,552816862	TRUE	FALSE
Gn7538_d0,039,cc	7538	2,87	20,05	134,03	0,036776	0,226076	0,001308	113,98	2,740881814	-7,433301494	FALSE	FALSE
Gn7557_d0,496,cc	7557	37,33	58,39	2813,73	0,266956	0,225872	0,001016	2755,34	5,590618776	-7,796461227	TRUE	FALSE
Gn7591_d0,026,cc	7591	2,08	18,33	102,41	0,020748	0,228924	0,00128	84,08	2,482077906	-7,4825811	FALSE	FALSE
Gn7604_d0,107,cc	7604	7,78	26,62	363,58	0,070288	0,230796	0,001356	336,96	3,771690365	-7,411117232	TRUE	FALSE
Gn7627_d0,741,cc	7627	47,92	72,47	4243,9	0,444076	0,226708	0,080452	4171,43	5,871862958	-1,49463511	TRUE	FALSE
Gn7638_d0,742,cc	7638	47,56	74,48	2189,69	0,441572	0,232508	0,081184	2115,21	4,877729755	-1,518013027	TRUE	FALSE
Gn7684_d0,277,cc	7684	20,19	43,18	2217,91	0,222208	0,234684	0,046456	2174,73	5,68269377	-2,336782643	TRUE	FALSE
Gn7725_d0,557,cc	7725	40,84	69,34	2498,09	0,43124	0,235868	0,1109	2428,75	5,170993808	-1,088720337	TRUE	FALSE
Gn7731_d0,916,cc	7731	59,58	88,6	4984,79	0,50482	0,236444	0,024232	4896,19	5,814082219	-3,286513144	TRUE	FALSE
Gn7750_d0,136,cc	7750	10,1	30,86	594,63	0,116356	0,237264	0,001164	563,77	4,268182284	-7,671258349	TRUE	FALSE
Gn7796_d0,46,cc	7796	40,14	55,83	2644	0,274044	0,24034	0,001628	2588,17	5,565537811	-7,205832268	TRUE	FALSE
Gn7811_d0,053,cc	7811	4,09	21,96	331,07	0,038396	0,240904	0,001204	309,11	3,914186327	-7,644479146	TRUE	FALSE
Gn7846_d0,161,cc	7846	12,37	33,96	657,95	0,131768	0,243352	0,010244	623,99	4,276069589	-4,570193568	TRUE	FALSE
Gn7870_d0,586,cc	7870	45,56	93,21	2949,99	0,448852	0,246736	0,102532	2856,78	4,984081512	-1,266893986	TRUE	FALSE
Gn7875_d0,224,cc	7875	17,32	40,7	790,51	0,14132	0,245084	0,00116	749,81	4,279683013	-7,723007687	TRUE	FALSE
Gn7881_d0,779,cc	7881	53,66	81,54	1891,89	0,4761	0,24868	0,06448	1810,35	4,536176442	-1,947366835	TRUE	FALSE
Gn7913_d0,228,cc	7913	17,76	42,2	1672,88	0,14176	0,2492	0,001152	1630,68	5,308947152	-7,757019541	TRUE	FALSE
Gn7914_d0,369,cc	7914	28,62	54,96	1221,15	0,256976	0,248868	9,44E-04	1166,19	4,47371461	-8,042378162	TRUE	FALSE
Gn7940_d0,126,cc	7940	10,02	31,06	384,1	0,088372	0,250308	0,005812	353,04	3,628352229	-5,428525888	TRUE	FALSE
Gn7965_d0,406,cc	7965	32,02	61,21	2268,73	0,269572	0,251928	0,014388	2207,52	5,211973747	-4,130073507	TRUE	FALSE
Gn7980_d0,795,cc	7980	55,62	86,7	2556,38	0,4916	0,25356	0,057404	2469,68	4,881926502	-2,143103998	TRUE	FALSE
BigCC100_10	1797	4,12	4,83	71,64	0,032872	0,01518	3,56E-04	66,81	3,890670243	-5,414150739	FALSE	FALSE
BigCC100_100	1758	2,59	2,75	27,47	0,026508	0,013112	3,52E-04	24,72	3,320353387	-5,21916852	FALSE	FALSE
BigCC100_1000	91	0,14	1,01	1,02	0,016576	1,80E-04	2,64E-04	0,01	0,01421385922	0,552541023	FALSE	FALSE
BigCC100_10000	54	0,12	1,01	1,02	0,016528	1,84E-04	4,00E-05	0,01	0,01421385922	-2,201633861	FALSE	FALSE
BigCC100_10004	52	0,13	0,99	1,02	0,016688	-1,20E-04	5,20E-05	0,03	0,04306872189	NA	FALSE	FALSE
BigCC100_1001	114	0,15	1,01	1,01	0,0168	-2,36E-04	-2,08E-04	0	0	-0,1822033312	FALSE	FALSE
BigCC100_10014	402	0,15	1,01	1,01	0,016712	-1,32E-04	-1,64E-04	0	0	0,3131578853	FALSE	FALSE
BigCC100_10018	37	0,13	1	1,01	0,016704	-1,84E-04	1,40E-04	0,01	0,01435529298	NA	FALSE	FALSE
BigCC100_1002	374	0,17	1,03	2,07	0,016576	2,36E-04	8,00E-06	1,04	1,00698643	-4,882643049	FALSE	FALSE
BigCC100_10023	82	0,14	1	1	0,0168	2,40E-05	4,40E-05	0	0	0,8744691179	FALSE	FALSE
BigCC100_1003	95	0,14	1	1,02	0,016612	1,04E-04	1,24E-04	0,02	0,0285691522	0,2537565922	FALSE	FALSE
BigCC100_10036	32	0,12	1	1,01	0,016504	3,00E-04	8,00E-06	0,01	0,01435529298	-5,22881869	FALSE	FALSE
BigCC100_10037	71	0,11	1,02	1,03	0,016552	-3,60E-05	1,08E-04	0,01	0,01407518521	NA	FALSE	FALSE
BigCC100_1004	76	0,13	1,01	1,01	0,016612	-1,20E-05	-5,60E-05	0	0	2,222392421	FALSE	FALSE
BigCC100_10042	140	0,14	1	1,02	0,01682	-2,20E-04	-1,28E-04	0,02	0,0285691522	-0,7813597135	FALSE	FALSE
BigCC100_10043	33	0,11	1,01	1,03	0,01668	-2,00E-05	6,00E-05	0,02	0,02828904443	NA	FALSE	FALSE
BigCC100_10045	48	0,11	1,02	1,02	0,016512	2,72E-04	9,60E-05	0	0	-1,502500341	FALSE	FALSE
BigCC100_10046	51	0,12	1	1,02	0,01682	-2,80E-04	-8,00E-06	0,02	0,0285691522	-5,129283017	FALSE	FALSE
BigCC100_10047	36	0,13	1,01	1	0,016608	-8,00E-06	1,08E-04	-0,01	-0,01435529298	NA	FALSE	FALSE
BigCC100_10048	35	0,12	1,01	1,02	0,016708	1,12E-04	-1,20E-04	0,01	0,01421385922	NA	FALSE	FALSE
BigCC100_10049	45	0,14	0,99	1	0,016756	5,60E-05	-2,40E-05	0,01	0,0144995697	NA	FALSE	FALSE
BigCC100_1005	133	0,14	1,01	1,02	0,016588	8,00E-05	2,40E-04	0,01	0,01421385922	1,584962501	FALSE	FALSE
BigCC100_10051	31	0,12	1	1,02	0,016584	2,36E-04	2,32E-04	0,02	0,0285691522	-0,02466205423	FALSE	FALSE
BigCC100_1006	66	0,13	1	1,01	0,016852	-1,28E-04	-8,80E-05	0,01	0,01435529298	-0,5405683814	FALSE	FALSE
BigCC100_1007	87	0,13	0,99	1,01	0,016676	1,24E-04	6,40E-05	0,02	0,02885486267	-0,9541963104	FALSE	FALSE
BigCC100_1008	102	0,12	1	1,03	0,016696	-1,28E-04	-4,80E-05	0,03	0,04264433741	-1,415037499	FALSE	FALSE
BigCC100_1009	49	0,11	1,01	1,03	0,016552	2,04E-04	2,80E-04	0,02	0,02828904443	0,456857675	FALSE	FALSE
BigCC100_101	1666	3,07	3,13	8,94	0,029376	0,013488	3,36E-04	5,81	1,514112174	-5,327071398	FALSE	FALSE
BigCC100_1010	162	0,15	1	1,02	0,016796	-1,44E-04	8,00E-06	0,02	0,0285691522	NA	FALSE	FALSE
BigCC100_1011	75	0,12	1,01	1,02	0,016844	-2,00E-04	-8,00E-06	0,01	0,01421385922	-4,64385619	FALSE	FALSE
BigCC100_10111	38	0,13	1,01	1,01	0,01672	-1,88E-04	8,80E-05	0	0	NA	FALSE	FALSE
BigCC100_10116	43	0,12	1	1,01	0,016832	-1,20E-05	0	0,01	0,01435529298	-Inf	FALSE	FALSE
BigCC100_1012	73	0,13	0,99	1,01	0,016792	-2,44E-04	-2,08E-04	0,02	0,02885486267	-0,2302976194	FALSE	FALSE
BigCC100_1013	72	0,11	1,02	1,03	0,016792	-2,64E-04	-2,56E-04	0,01	0,01407518521	-0,04439411936	FALSE	FALSE
BigCC100_1014	212	0,12	1,03	1,04	0,016524	1,44E-04	3,60E-05	0,01	0,01393919096	-2	FALSE	FALSE
BigCC100_1015	109	0,12	0,98	1,03	0,016632	1,92E-04	-4,80E-05	0,05	0,07179068307	NA	FALSE	FALSE
BigCC100_1016	71	0,14	0,97	1,02	0,016764	-1,48E-04	5,60E-05	0,05	0,07251249978	NA	FALSE	FALSE
BigCC100_1017	161	0,15	0,97	1,03	0,016844	-1,12E-04	-3,16E-04	0,06	0,086587685	1,496425826	FALSE	FALSE
BigCC100_1018	388	0,14	1,01	1,04	0,01652	9,60E-05	2,32E-04	0,03	0,04222823539	1,273018494	FALSE	FALSE
BigCC100_1019	56	0,11	1	1,03	0,016588	-3,60E-05	-4,40E-05	0,03	0,04264433741	0,2895066172	FALSE	FALSE
BigCC100_102	249	0,19	0,98	1,08	0,016756	-1,40E-04	-2,16E-04	0,1	0,140177658	0,6256044852	FALSE	FALSE
BigCC100_1020	249	0,15	1,01	1,02	0,016628	-1,84E-04	2,04E-04	0,01	0,01421385922	NA	FALSE	FALSE
BigCC100_1021	59	0,14	0,99	1	0,016556	-1,20E-05	2,68E-04	0,01	0,0144995697	NA	FALSE	FALSE
BigCC100_1022	92	0,11	1,03	1,03	0,01658	0	7,20E-05	0	0	Inf	FALSE	FALSE
BigCC100_1023	684	0,2	1,07	3,1	0,01678	3,60E-05	-1,92E-04	2,03	1,534657419	NA	FALSE	FALSE
BigCC100_10234	46	0,09	1,04	1,05	0,01652	3,04E-04	1,40E-04	0,01	0,01380579953	-1,118644496	FALSE	FALSE
BigCC100_10236	80	0,11	1,01	1,03	0,0166	-3,20E-05	-6,40E-05	0,02	0,02828904443	1	FALSE	FALSE
BigCC100_10237	32	0,09	1,02	1,04	0,016856	-2,72E-04	-2,40E-05	0,02	0,02801437617	-3,502500341	FALSE	FALSE
BigCC100_10238	79	0,11	1,01	1,05	0,016516	3,32E-04	3,20E-05	0,04	0,05603403491	-3,375039431	FALSE	FALSE
BigCC100_10239	102	0,12	1	1,02	0,016808	8,00E-06	2,40E-05	0,02	0,0285691522	1,584962501	FALSE	FALSE
BigCC100_1024	186	0,13	1,03	1,04	0,016532	9,20E-05	2,68E-04	0,01	0,01393919096	1,542527234	FALSE	FALSE
BigCC100_10241	90	0,13	1	1,01	0,01664	-9,20E-05	2,04E-04	0,01	0,01435529298	NA	FALSE	FALSE
BigCC100_10242	85	0,13	0,99	1,01	0,016516	4,00E-06	8,00E-06	0,02	0,02885486267	1	FALSE	FALSE
BigCC100_10248	45	0,13	0,99	1,02	0,016512	2,00E-05	3,20E-05	0,03	0,04306872189	0,6780719051	FALSE	FALSE
BigCC100_10249	81	0,13	1,02	1,02	0,016516	4,00E-05	1,48E-04	0	0	1,887525271	FALSE	FALSE
BigCC100_1025	48	0,14	0,96	1	0,016816	-1,96E-04	-2,76E-04	0,04	0,05889368905	0,4938146127	FALSE	FALSE
BigCC100_10250	43	0,13	0,99	1,01	0,016532	1,44E-04	3,08E-04	0,02	0,02885486267	1,096861539	FALSE	FALSE
BigCC100_10251	57	0,12	1,01	1,02	0,016744	8,40E-05	-8,00E-06	0,01	0,01421385922	NA	FALSE	FALSE
BigCC100_10253	48	0,13	1	1,01	0,016556	1,44E-04	-8,00E-06	0,01	0,01435529298	NA	FALSE	FALSE
BigCC100_10254	35	0,13	0,99	1,01	0,01652	2,68E-04	1,20E-04	0,02	0,02885486267	-1,159198595	FALSE	FALSE
BigCC100_10259	58	0,1	1,02	1,04	0,016804	-1,88E-04	-1,92E-04	0,02	0,02801437617	0,03037364904	FALSE	FALSE
BigCC100_1026	146	0,14	1,03	1,04	0,016748	-1,40E-04	-1,48E-04	0,01	0,01393919096	0,08017034868	FALSE	FALSE
BigCC100_10262	56	0,13	1	1,02	0,016592	-1,20E-05	2,24E-04	0,02	0,0285691522	NA	FALSE	FALSE
BigCC100_10265	31	0,1	1,01	1,03	0,016576	1,80E-04	1,24E-04	0,02	0,02828904443	-0,5376567859	FALSE	FALSE
BigCC100_10266	58	0,13	0,99	0,99	0,016836	-3,36E-04	-1,24E-04	0	0	-1,438121112	FALSE	FALSE
BigCC100_10267	41	0,12	1,01	1	0,016456	8,80E-05	1,36E-04	-0,01	-0,01435529298	0,6280312226	FALSE	FALSE
BigCC100_10268	62	0,12	0,99	1,02	0,016768	-6,40E-05	-2,48E-04	0,03	0,04306872189	1,95419631	FALSE	FALSE
BigCC100_10269	33	0,1	1,03	1,04	0,016532	-4,40E-05	1,56E-04	0,01	0,01393919096	NA	FALSE	FALSE
BigCC100_1027	101	0,14	1,02	1,03	0,01652	2,84E-04	1,68E-04	0,01	0,01407518521	-0,7574296967	FALSE	FALSE
BigCC100_10271	52	0,1	1,03	1,05	0,016756	-2,32E-04	-4,00E-06	0,02	0,02774499048	-5,857980995	FALSE	FALSE
BigCC100_10273	80	0,13	1,01	1,02	0,01678	-1,84E-04	-2,64E-04	0,01	0,01421385922	0,5208321633	FALSE	FALSE
BigCC100_10276	48	0,11	1	1,02	0,016448	1,52E-04	2,76E-04	0,02	0,0285691522	0,8605969433	FALSE	FALSE
BigCC100_10277	33	0,1	1,02	1,04	0,016516	2,88E-04	3,36E-04	0,02	0,02801437617	0,2223924213	FALSE	FALSE
BigCC100_10278	34	0,12	1,01	1,03	0,016628	-1,08E-04	-1,20E-05	0,02	0,02828904443	-3,169925001	FALSE	FALSE
BigCC100_10279	61	0,11	1,01	1,04	0,01654	5,20E-05	3,00E-04	0,03	0,04222823539	2,528378972	FALSE	FALSE
BigCC100_1028	82	0,11	1,03	1,04	0,016584	-7,20E-05	-4,00E-06	0,01	0,01393919096	-4,169925001	FALSE	FALSE
BigCC100_1029	86	0,12	1,01	1,01	0,01658	1,60E-04	1,00E-04	0	0	-0,6780719051	FALSE	FALSE
BigCC100_103	1304	1,56	2,05	6,68	0,016684	0,009252	5,60E-04	4,63	1,704224193	-4,046266534	FALSE	FALSE
BigCC100_1030	64	0,12	1	1,03	0,016848	-9,20E-05	-2,52E-04	0,03	0,04264433741	1,453717967	FALSE	FALSE
BigCC100_1031	85	0,11	1,02	1,05	0,016512	6,80E-05	8,00E-06	0,03	0,04182017569	-3,087462841	FALSE	FALSE
BigCC100_10310	114	0,12	1,02	1,03	0,016404	4,08E-04	3,92E-04	0,01	0,01407518521	-0,05771549786	FALSE	FALSE
BigCC100_10316	65	0,12	1	1,03	0,01672	1,08E-04	-1,24E-04	0,03	0,04264433741	NA	FALSE	FALSE
BigCC100_10317	62	0,1	1,03	1,02	0,016676	1,04E-04	1,68E-04	-0,01	-0,01407518521	0,6918777046	FALSE	FALSE
BigCC100_1032	54	0,1	1,03	1,04	0,016616	-2,00E-05	1,36E-04	0,01	0,01393919096	NA	FALSE	FALSE
BigCC100_10320	72	0,13	1	1,01	0,016628	-3,60E-05	2,00E-04	0,01	0,01435529298	NA	FALSE	FALSE
BigCC100_1033	86	0,12	1	1,04	0,016668	1,48E-04	-6,40E-05	0,04	0,05658352837	NA	FALSE	FALSE
BigCC100_10333	81	0,12	1,02	1,02	0,016648	1,60E-04	-2,80E-05	0	0	NA	FALSE	FALSE
BigCC100_1034	286	0,13	1,01	1,05	0,016612	8,40E-05	-9,20E-05	0,04	0,05603403491	NA	FALSE	FALSE
BigCC100_1035	96	0,12	1,01	1,04	0,016824	-2,44E-04	8,00E-06	0,03	0,04222823539	NA	FALSE	FALSE
BigCC100_10352	51	0,11	1,01	1,01	0,016812	-2,44E-04	2,00E-05	0	0	NA	FALSE	FALSE
BigCC100_1036	34	0,11	1	1,01	0,01676	8,00E-05	8,40E-05	0,01	0,01435529298	0,07038932789	FALSE	FALSE
BigCC100_10367	97	0,13	1,01	1,02	0,016524	1,60E-05	2,40E-05	0,01	0,01421385922	0,5849625007	FALSE	FALSE
BigCC100_10368	85	0,12	1	1,01	0,0166	-2,80E-05	1,60E-05	0,01	0,01435529298	NA	FALSE	FALSE
BigCC100_1037	87	0,11	1,02	1,06	0,016608	-7,60E-05	5,60E-05	0,04	0,05549511259	NA	FALSE	FALSE
BigCC100_1038	188	0,13	1,01	1,04	0,016828	-4,00E-06	-4,00E-06	0,03	0,04222823539	0	FALSE	FALSE
BigCC100_10388	60	0,1	1,02	1,05	0,016808	-2,96E-04	-4,80E-05	0,03	0,04182017569	-2,624490865	FALSE	FALSE
BigCC100_1039	34	0,12	1,01	1	0,016776	5,20E-05	-1,84E-04	-0,01	-0,01435529298	NA	FALSE	FALSE
BigCC100_10390	42	0,11	1	1,03	0,016392	1,40E-04	2,04E-04	0,03	0,04264433741	0,543142325	FALSE	FALSE
BigCC100_10391	31	0,1	1,03	1,04	0,01652	1,00E-04	1,72E-04	0,01	0,01393919096	0,7824085649	FALSE	FALSE
BigCC100_10392	106	0,14	1	0,99	0,016584	-5,20E-05	7,20E-05	-0,01	-0,0144995697	NA	FALSE	FALSE
BigCC100_104	2299	1,18	1,18	605,25	0,016712	0,016536	-1,00E-04	604,07	9,002600504	NA	TRUE	FALSE
BigCC100_10403	44	0,11	1,02	1,01	0,016592	1,20E-04	-4,00E-05	-0,01	-0,01421385922	NA	FALSE	FALSE
BigCC100_10404	43	0,13	1	1,05	0,01654	2,80E-04	2,00E-04	0,05	0,07038932789	-0,4854268272	FALSE	FALSE
BigCC100_10408	48	0,12	1	1	0,016496	2,60E-04	1,72E-04	0	0	-0,5961030583	FALSE	FALSE
BigCC100_10409	57	0,1	1,02	1,02	0,016852	-2,76E-04	-1,04E-04	0	0	-1,408084739	FALSE	FALSE
BigCC100_10414	63	0,13	1,01	1,02	0,01678	-6,80E-05	-1,68E-04	0,01	0,01421385922	1,304854582	FALSE	FALSE
BigCC100_10419	34	0,12	1,02	1	0,016756	5,60E-05	5,60E-05	-0,02	-0,0285691522	0	FALSE	FALSE
BigCC100_10421	87	0,1	1,03	1,03	0,01652	-4,00E-06	2,40E-05	0	0	NA	FALSE	FALSE
BigCC100_10422	57	0,14	1	0,98	0,016692	4,80E-05	1,60E-04	-0,02	-0,02914634566	1,736965594	FALSE	FALSE
BigCC100_1044	248	0,14	1,04	1,02	0,016628	8,80E-05	-4,40E-05	-0,02	-0,02801437617	NA	FALSE	FALSE
BigCC100_10446	97	0,12	1	1	0,016468	6,00E-05	3,60E-04	0	0	2,584962501	FALSE	FALSE
BigCC100_10447	31	0,11	1,02	1,01	0,016824	-3,04E-04	-2,40E-05	-0,01	-0,01421385922	-3,662965013	FALSE	FALSE
BigCC100_1046	623	0,14	1,07	2,07	0,016808	-2,24E-04	-5,20E-05	1	0,9520199711	-2,106915204	FALSE	FALSE
BigCC100_1047	222	0,18	1,05	1,04	0,01662	1,88E-04	1,28E-04	-0,01	-0,01380579953	-0,5545888517	FALSE	FALSE
BigCC100_1048	225	0,17	1,02	1,08	0,016632	-8,40E-05	1,64E-04	0,06	0,08246216019	NA	FALSE	FALSE
BigCC100_1049	234	0,14	1,08	3,11	0,016848	-3,40E-04	-2,08E-04	2,03	1,525883268	-0,708951218	FALSE	FALSE
BigCC100_10492	34	0,13	1,01	0,99	0,016728	7,20E-05	-1,68E-04	-0,02	-0,02885486267	NA	FALSE	FALSE
BigCC100_1050	224	0,17	1,05	1,02	0,016676	8,40E-05	1,64E-04	-0,03	-0,04182017569	0,9652345818	FALSE	FALSE
BigCC100_1051	262	0,15	1,02	1,04	0,01672	-2,00E-05	-1,40E-04	0,02	0,02801437617	2,807354922	FALSE	FALSE
BigCC100_10514	55	0,14	1	1,01	0,016524	2,88E-04	2,40E-04	0,01	0,01435529298	-0,2630344058	FALSE	FALSE
BigCC100_10517	36	0,11	1	1,01	0,016792	-4,40E-05	4,80E-05	0,01	0,01435529298	NA	FALSE	FALSE
BigCC100_1052	110	0,11	1,03	1,02	0,016588	1,08E-04	2,36E-04	-0,01	-0,01407518521	1,127755547	FALSE	FALSE
BigCC100_1053	33	0,13	1	1,02	0,016616	2,00E-04	-8,00E-06	0,02	0,0285691522	NA	FALSE	FALSE
BigCC100_10543	81	0,11	1,01	1,01	0,016812	-7,60E-05	-1,84E-04	0	0	1,275634443	FALSE	FALSE
BigCC100_10544	92	0,13	1,01	1,02	0,016592	2,00E-04	-1,60E-05	0,01	0,01421385922	NA	FALSE	FALSE
BigCC100_10545	38	0,11	1	1,01	0,016664	8,80E-05	-1,12E-04	0,01	0,01435529298	NA	FALSE	FALSE
BigCC100_10546	137	0,1	1,02	1,03	0,016848	-2,40E-05	-1,36E-04	0,01	0,01407518521	2,502500341	FALSE	FALSE
BigCC100_10547	167	0,13	1,01	1,02	0,016656	1,48E-04	-6,80E-05	0,01	0,01421385922	NA	FALSE	FALSE
BigCC100_10548	55	0,11	1	1,01	0,016636	-4,40E-05	1,04E-04	0,01	0,01435529298	NA	FALSE	FALSE
BigCC100_1055	40	0,1	1,02	1,02	0,016716	-1,04E-04	4,40E-05	0	0	NA	FALSE	FALSE
BigCC100_10550	62	0,13	1,01	1,02	0,01654	2,84E-04	5,20E-05	0,01	0,01421385922	-2,449307401	FALSE	FALSE
BigCC100_10552	55	0,1	1,04	1,01	0,016756	4,00E-05	1,00E-04	-0,03	-0,04222823539	1,321928095	FALSE	FALSE
BigCC100_10554	64	0,14	0,99	1,02	0,01652	4,00E-06	2,36E-04	0,03	0,04306872189	5,882643049	FALSE	FALSE
BigCC100_10555	116	0,11	1	1,01	0,016496	3,24E-04	3,40E-04	0,01	0,01435529298	0,06954093325	FALSE	FALSE
BigCC100_10556	73	0,11	1,03	1,01	0,016608	3,60E-05	-4,80E-05	-0,02	-0,02828904443	NA	FALSE	FALSE
BigCC100_10559	67	0,14	1	1,01	0,0168	-1,64E-04	-5,20E-05	0,01	0,01435529298	-1,657112286	FALSE	FALSE
BigCC100_1056	190	0,12	1	1,01	0,016564	2,56E-04	2,44E-04	0,01	0,01435529298	-0,06926266244	FALSE	FALSE
BigCC100_10560	123	0,11	1,03	1,02	0,016828	-2,84E-04	-2,96E-04	-0,01	-0,01407518521	0,05970624612	FALSE	FALSE
BigCC100_10563	36	0,13	1,01	1,01	0,016536	2,48E-04	1,20E-05	0	0	-4,36923381	FALSE	FALSE
BigCC100_10570	60	0,1	1,03	1,02	0,01676	1,20E-05	-1,92E-04	-0,01	-0,01407518521	NA	FALSE	FALSE
BigCC100_10571	48	0,13	1,01	1,01	0,016516	2,00E-05	5,60E-05	0	0	1,485426827	FALSE	FALSE
BigCC100_10573	117	0,12	0,99	1	0,016504	8,40E-05	8,80E-05	0,01	0,0144995697	0,06711419586	FALSE	FALSE
BigCC100_1058	119	0,11	1,02	1,02	0,016676	-1,36E-04	-1,24E-04	0	0	-0,1332665309	FALSE	FALSE
BigCC100_1059	479	0,14	1,01	1,03	0,01678	-1,84E-04	6,40E-05	0,02	0,02828904443	NA	FALSE	FALSE
BigCC100_10590	61	0,1	1,02	1,02	0,01654	-2,80E-05	8,40E-05	0	0	NA	FALSE	FALSE
BigCC100_106	2501	2,87	3,98	8,15	0,028272	0,027052	4,40E-04	4,17	1,034031629	-5,942087925	FALSE	FALSE
BigCC100_1060	79	0,12	1	1,01	0,016792	-1,76E-04	-4,00E-05	0,01	0,01435529298	-2,137503524	FALSE	FALSE
BigCC100_10601	37	0,11	1,01	1,01	0,016676	-1,56E-04	1,32E-04	0	0	NA	FALSE	FALSE
BigCC100_10604	35	0,12	1,02	1,03	0,016548	4,40E-05	4,00E-06	0,01	0,01407518521	-3,459431619	FALSE	FALSE
BigCC100_10618	36	0,14	0,99	1,01	0,016556	-2,00E-05	2,84E-04	0,02	0,02885486267	NA	FALSE	FALSE
BigCC100_1062	124	0,12	1,01	1,01	0,016804	-2,16E-04	-6,00E-05	0	0	-1,847996907	FALSE	FALSE
BigCC100_1063	40	0,13	1,01	1,02	0,016808	-1,32E-04	-2,92E-04	0,01	0,01421385922	1,14543044	FALSE	FALSE
BigCC100_10633	103	0,11	1	1,01	0,016516	3,20E-04	7,60E-05	0,01	0,01435529298	-2,074000581	FALSE	FALSE
BigCC100_10636	61	0,11	1,01	1,01	0,016668	-1,00E-04	3,60E-05	0	0	NA	FALSE	FALSE
BigCC100_10649	54	0,11	1,02	1,04	0,01678	-2,44E-04	-2,00E-04	0,02	0,02801437617	-0,2868811478	FALSE	FALSE
BigCC100_1065	83	0,12	1	1	0,01656	2,76E-04	2,56E-04	0	0	-0,1085244568	FALSE	FALSE
BigCC100_10652	33	0,1	1,03	1,02	0,016856	-3,32E-04	-2,44E-04	-0,01	-0,01407518521	-0,4443020938	FALSE	FALSE
BigCC100_10658	31	0,13	1,01	1,01	0,0166	2,16E-04	-4,40E-05	0	0	NA	FALSE	FALSE
BigCC100_1066	67	0,12	1	1	0,016748	1,00E-04	8,00E-05	0	0	-0,3219280949	FALSE	FALSE
BigCC100_1067	135	0,11	1,04	1,03	0,016836	-2,40E-05	-8,80E-05	-0,01	-0,01393919096	1,874469118	FALSE	FALSE
BigCC100_10681	160	0,16	1	1,02	0,016472	3,20E-04	2,80E-04	0,02	0,0285691522	-0,1926450779	FALSE	FALSE
BigCC100_10682	32	0,11	1	1,01	0,016504	4,00E-05	4,80E-05	0,01	0,01435529298	0,2630344058	FALSE	FALSE
BigCC100_10684	78	0,11	1,02	1,02	0,016532	2,00E-04	0	0	0	-Inf	FALSE	FALSE
BigCC100_10685	83	0,12	1,02	1,03	0,016796	-2,68E-04	-1,32E-04	0,01	0,01407518521	-1,021695071	FALSE	FALSE
BigCC100_10688	57	0,13	1,01	1,02	0,016628	1,60E-04	-4,00E-05	0,01	0,01421385922	NA	FALSE	FALSE
BigCC100_10690	56	0,12	1	1	0,016656	1,80E-04	-1,40E-04	0	0	NA	FALSE	FALSE
BigCC100_10691	55	0,12	1	1	0,016804	4,00E-06	-2,24E-04	0	0	NA	FALSE	FALSE
BigCC100_10692	55	0,12	1,01	1,03	0,016508	1,52E-04	2,40E-04	0,02	0,02828904443	0,6589630822	FALSE	FALSE
BigCC100_10693	59	0,13	0,98	0,99	0,016812	0	-2,76E-04	0,01	0,01464677596	NA	FALSE	FALSE
BigCC100_10694	137	0,13	0,99	1,01	0,01654	7,60E-05	1,56E-04	0,02	0,02885486267	1,037474705	FALSE	FALSE
BigCC100_10696	91	0,12	0,99	1,01	0,016824	-1,08E-04	4,00E-06	0,02	0,02885486267	NA	FALSE	FALSE
BigCC100_10698	52	0,13	0,97	0,99	0,016592	2,48E-04	-7,20E-05	0,02	0,02944377789	NA	FALSE	FALSE
BigCC100_10699	50	0,13	0,98	1,01	0,016808	1,20E-05	-2,60E-04	0,03	0,04350163864	NA	FALSE	FALSE
BigCC100_107	3287	3,37	3,54	7,35	0,033436	0,045564	5,60E-04	3,81	1,05399489	-6,346323767	FALSE	FALSE
BigCC100_10700	33	0,13	0,98	0,99	0,016624	2,00E-04	-8,80E-05	0,01	0,01464677596	NA	FALSE	FALSE
BigCC100_10701	62	0,13	0,97	1,01	0,016572	1,32E-04	9,60E-05	0,04	0,05829864056	-0,4594316186	FALSE	FALSE
BigCC100_10703	49	0,13	0,97	0,99	0,016796	-2,24E-04	-2,28E-04	0,02	0,02944377789	0,02553509211	FALSE	FALSE
BigCC100_10706	224	0,13	1,01	1,03	0,016592	2,32E-04	2,40E-04	0,02	0,02828904443	0,04890960048	FALSE	FALSE
BigCC100_1071	103	0,13	1	0,99	0,016604	1,76E-04	-8,40E-05	-0,01	-0,0144995697	NA	FALSE	FALSE
BigCC100_10710	75	0,13	0,99	1	0,016632	1,60E-05	1,64E-04	0,01	0,0144995697	3,357552005	FALSE	FALSE
BigCC100_10713	88	0,12	1,03	1,01	0,016528	5,20E-05	2,44E-04	-0,02	-0,02828904443	2,230297619	FALSE	FALSE
BigCC100_10718	58	0,13	0,99	1,01	0,016804	-2,52E-04	1,20E-05	0,02	0,02885486267	NA	FALSE	FALSE
BigCC100_10719	38	0,13	0,99	1,01	0,016524	3,24E-04	2,28E-04	0,02	0,02885486267	-0,5069599887	FALSE	FALSE
BigCC100_10720	88	0,13	0,98	0,99	0,016816	-3,08E-04	-2,84E-04	0,01	0,01464677596	-0,1170394212	FALSE	FALSE
BigCC100_10722	32	0,12	1	1,02	0,01674	-1,52E-04	-1,96E-04	0,02	0,0285691522	0,3667823307	FALSE	FALSE
BigCC100_10726	45	0,12	1	1	0,016584	-3,60E-05	0	0	0	-Inf	FALSE	FALSE
BigCC100_10730	71	0,11	1,01	1,02	0,016592	-1,32E-04	-6,40E-05	0,01	0,01421385922	-1,044394119	FALSE	FALSE
BigCC100_10731	33	0,11	1,02	1,02	0,0165	2,08E-04	4,40E-05	0	0	-2,2410081	FALSE	FALSE
BigCC100_10732	38	0,13	1	0,99	0,016672	-1,44E-04	-1,20E-05	-0,01	-0,0144995697	-3,584962501	FALSE	FALSE
BigCC100_10734	47	0,13	0,99	0,99	0,01682	-2,88E-04	-1,16E-04	0	0	-1,311944006	FALSE	FALSE
BigCC100_10736	57	0,13	0,99	1,02	0,01652	1,48E-04	0	0,03	0,04306872189	-Inf	FALSE	FALSE
BigCC100_10737	43	0,12	0,98	1	0,016752	-1,76E-04	-2,20E-04	0,02	0,02914634566	0,3219280949	FALSE	FALSE
BigCC100_10740	38	0,11	1,01	1,03	0,016704	-1,12E-04	-1,20E-04	0,02	0,02828904443	0,09953567355	FALSE	FALSE
BigCC100_10753	33	0,13	0,99	0,99	0,016632	-8,00E-05	-1,00E-04	0	0	0,3219280949	FALSE	FALSE
BigCC100_10756	62	0,11	1,01	1,03	0,0167	2,80E-05	-1,20E-05	0,02	0,02828904443	NA	FALSE	FALSE
BigCC100_1076	66	0,12	1,02	1,03	0,016536	2,76E-04	2,88E-04	0,01	0,01407518521	0,06140054466	FALSE	FALSE
BigCC100_10769	47	0,14	0,98	1	0,01662	1,96E-04	-2,80E-05	0,02	0,02914634566	NA	FALSE	FALSE
BigCC100_10778	70	0,11	1,01	1,04	0,016592	2,40E-05	2,24E-04	0,03	0,04222823539	3,222392421	FALSE	FALSE
BigCC100_1078	41	0,11	1,01	1,01	0,016708	-2,12E-04	1,20E-04	0	0	NA	FALSE	FALSE
BigCC100_1079	38	0,12	1	1	0,016812	-1,20E-05	-4,00E-06	0	0	-1,584962501	FALSE	FALSE
BigCC100_10790	42	0,11	1,01	1,01	0,0168	-1,12E-04	3,60E-05	0	0	NA	FALSE	FALSE
BigCC100_10797	35	0,13	1	0,99	0,016764	-4,40E-05	-1,52E-04	-0,01	-0,0144995697	1,788495895	FALSE	FALSE
BigCC100_108	476	0,31	1,13	3,13	0,016636	-2,00E-05	1,96E-04	2	1,469839885	NA	FALSE	FALSE
BigCC100_1081	165	0,14	0,98	1,01	0,016792	6,00E-05	4,00E-05	0,03	0,04350163864	-0,5849625007	FALSE	FALSE
BigCC100_10813	60	0,12	0,98	1	0,016756	8,40E-05	-1,60E-04	0,02	0,02914634566	NA	FALSE	FALSE
BigCC100_1082	66	0,11	1,01	1,01	0,016736	-1,68E-04	2,80E-05	0	0	NA	FALSE	FALSE
BigCC100_1083	384	0,13	1	1,01	0,016784	-2,48E-04	-1,92E-04	0,01	0,01435529298	-0,3692338097	FALSE	FALSE
BigCC100_10831	58	0,11	1,01	1,04	0,016472	1,60E-04	3,36E-04	0,03	0,04222823539	1,070389328	FALSE	FALSE
BigCC100_10857	116	0,12	1,02	1,01	0,01656	-4,40E-05	1,72E-04	-0,01	-0,01421385922	NA	FALSE	FALSE
BigCC100_10858	145	0,15	1,02	1,01	0,016796	-2,60E-04	4,00E-06	-0,01	-0,01421385922	NA	FALSE	FALSE
BigCC100_10859	47	0,12	1,02	1	0,016632	-3,60E-05	1,64E-04	-0,02	-0,0285691522	NA	FALSE	FALSE
BigCC100_1086	104	0,12	1	1,03	0,016544	4,80E-05	2,80E-04	0,03	0,04264433741	2,544320516	FALSE	FALSE
BigCC100_10860	129	0,14	0,98	0,99	0,01682	-1,20E-05	-2,88E-04	0,01	0,01464677596	4,584962501	FALSE	FALSE
BigCC100_10862	35	0,12	1	1	0,016708	8,00E-05	2,00E-05	0	0	-2	FALSE	FALSE
BigCC100_10863	35	0,12	1	1,03	0,016536	1,68E-04	2,00E-05	0,03	0,04264433741	-3,070389328	FALSE	FALSE
BigCC100_10864	85	0,12	1	1	0,0166	2,00E-04	2,40E-04	0	0	0,2630344058	FALSE	FALSE
BigCC100_10865	44	0,12	1,02	1	0,016504	8,00E-05	3,00E-04	-0,02	-0,0285691522	1,906890596	FALSE	FALSE
BigCC100_10868	40	0,13	1,01	0,98	0,01666	-7,20E-05	1,44E-04	-0,03	-0,04350163864	NA	FALSE	FALSE
BigCC100_10870	120	0,14	1,02	1,01	0,01684	-8,00E-06	-2,12E-04	-0,01	-0,01421385922	4,727920455	FALSE	FALSE
BigCC100_10873	79	0,12	1	1	0,01654	5,20E-05	7,20E-05	0	0	0,4694852833	FALSE	FALSE
BigCC100_10874	43	0,11	1,01	1,04	0,01658	-8,00E-05	2,00E-05	0,03	0,04222823539	NA	FALSE	FALSE
BigCC100_10875	38	0,12	1	1	0,016568	-3,20E-05	8,00E-05	0	0	NA	FALSE	FALSE
BigCC100_10877	37	0,11	1,01	1,01	0,016444	2,24E-04	3,68E-04	0	0	0,716207034	FALSE	FALSE
BigCC100_10879	43	0,11	1	1,01	0,016592	1,32E-04	2,28E-04	0,01	0,01435529298	0,7884958948	FALSE	FALSE
BigCC100_10881	46	0,11	1,01	1,01	0,016592	1,52E-04	2,24E-04	0	0	0,5594274086	FALSE	FALSE
BigCC100_10884	79	0,12	1,02	1,04	0,016536	2,00E-04	4,00E-06	0,02	0,02801437617	-5,64385619	FALSE	FALSE
BigCC100_1089	527	0,18	1,04	1,04	0,016724	9,20E-05	8,80E-05	0	0	-0,06413033742	FALSE	FALSE
BigCC100_10892	69	0,11	1,02	1,03	0,016728	4,00E-06	-1,52E-04	0,01	0,01407518521	NA	FALSE	FALSE
BigCC100_10893	39	0,12	1	1	0,016816	-2,00E-04	2,00E-05	0	0	NA	FALSE	FALSE
BigCC100_109	1572	2,59	2,72	7,73	0,02644	0,012364	3,24E-04	5,01	1,506861763	-5,254007936	FALSE	FALSE
BigCC100_1090	42	0,12	1,01	1	0,016652	1,40E-04	1,84E-04	-0,01	-0,01435529298	0,3942789391	FALSE	FALSE
BigCC100_10902	43	0,11	1,02	1,03	0,016812	0	-2,96E-04	0,01	0,01407518521	NA	FALSE	FALSE
BigCC100_10904	46	0,12	1	1	0,016808	-9,60E-05	1,60E-05	0	0	NA	FALSE	FALSE
BigCC100_10907	31	0,11	1,01	1,04	0,016764	2,80E-05	-1,76E-04	0,03	0,04222823539	NA	FALSE	FALSE
BigCC100_1091	537	0,13	1,01	1,01	0,016536	-8,00E-06	3,04E-04	0	0	NA	FALSE	FALSE
BigCC100_10918	58	0,12	1	1	0,0168	-8,40E-05	-4,00E-06	0	0	-4,392317423	FALSE	FALSE
BigCC100_1092	237	0,12	1,01	1,04	0,0168	-2,20E-04	-1,12E-04	0,03	0,04222823539	-0,9740047915	FALSE	FALSE
BigCC100_1093	140	0,13	1,01	1,02	0,016832	-9,60E-05	-2,88E-04	0,01	0,01421385922	1,584962501	FALSE	FALSE
BigCC100_1094	185	0,13	1,01	1,02	0,0166	1,88E-04	1,44E-04	0,01	0,01421385922	-0,3846638502	FALSE	FALSE
BigCC100_1095	136	0,13	1,01	1,01	0,016664	1,44E-04	4,00E-06	0	0	-5,169925001	FALSE	FALSE
BigCC100_10952	70	0,11	1,01	1,01	0,016792	8,00E-06	4,00E-05	0	0	2,321928095	FALSE	FALSE
BigCC100_1096	159	0,12	1	1,03	0,016676	-1,04E-04	-8,80E-05	0,03	0,04264433741	-0,2410080995	FALSE	FALSE
BigCC100_10963	49	0,11	1,01	1,01	0,016788	-2,44E-04	-2,64E-04	0	0	0,1136567818	FALSE	FALSE
BigCC100_1097	54	0,11	1,01	1,01	0,016716	1,00E-04	-1,12E-04	0	0	NA	FALSE	FALSE
BigCC100_10971	32	0,12	1	1	0,016716	-1,72E-04	-1,88E-04	0	0	0,128324097	FALSE	FALSE
BigCC100_1098	40	0,11	1,01	1,03	0,016612	-8,80E-05	-5,60E-05	0,02	0,02828904443	-0,6520766966	FALSE	FALSE
BigCC100_10990	56	0,11	1,01	1,01	0,01654	8,80E-05	-1,20E-05	0	0	NA	FALSE	FALSE
BigCC100_11	1800	4,09	4,79	12,39	0,032864	0,015456	3,44E-04	7,6	1,371078626	-5,489614624	FALSE	FALSE
BigCC100_110	1927	2,8	3,81	2415,17	0,033532	0,017828	4,32E-04	2411,36	9,308118029	-5,366969743	TRUE	FALSE
BigCC100_1100	259	0,12	1	1,01	0,016844	-3,24E-04	-3,08E-04	0,01	0,01435529298	-0,07306346219	FALSE	FALSE
BigCC100_11007	53	0,11	1	1,03	0,016588	2,28E-04	-6,40E-05	0,03	0,04264433741	NA	FALSE	FALSE
BigCC100_1101	79	0,11	1,01	1,01	0,016808	-2,08E-04	1,20E-05	0	0	NA	FALSE	FALSE
BigCC100_11038	35	0,12	1	1	0,016576	2,36E-04	2,20E-04	0	0	-0,1012833358	FALSE	FALSE
BigCC100_11039	53	0,11	1,01	1,04	0,016792	4,00E-06	5,20E-05	0,03	0,04222823539	3,700439718	FALSE	FALSE
BigCC100_1104	73	0,13	0,98	0,99	0,016828	-2,36E-04	-1,60E-05	0,01	0,01464677596	-3,882643049	FALSE	FALSE
BigCC100_11042	41	0,11	1	1,01	0,016724	-1,72E-04	-1,24E-04	0,01	0,01435529298	-0,4720684443	FALSE	FALSE
BigCC100_11043	41	0,14	0,97	0,98	0,016572	1,20E-05	1,60E-04	0,01	0,01479700193	3,736965594	FALSE	FALSE
BigCC100_11044	43	0,13	0,98	1,02	0,016472	3,52E-04	2,96E-04	0,04	0,05771549786	-0,249978253	FALSE	FALSE
BigCC100_11045	39	0,13	0,97	0,99	0,016708	-2,80E-05	-2,04E-04	0,02	0,02944377789	2,86507042	FALSE	FALSE
BigCC100_11046	58	0,12	0,99	1	0,016452	1,48E-04	1,68E-04	0,01	0,0144995697	0,1828640571	FALSE	FALSE
BigCC100_11047	60	0,14	0,96	0,98	0,01658	-5,60E-05	2,40E-04	0,02	0,02974734339	NA	FALSE	FALSE
BigCC100_11049	379	0,14	0,98	1	0,016564	1,92E-04	-5,20E-05	0,02	0,02914634566	NA	FALSE	FALSE
BigCC100_1105	94	0,14	0,98	0,98	0,01648	3,68E-04	1,92E-04	0	0	-0,9385994553	FALSE	FALSE
BigCC100_11050	118	0,15	0,97	0,99	0,016572	2,88E-04	2,24E-04	0,02	0,02944377789	-0,3625700794	FALSE	FALSE
BigCC100_11051	41	0,14	0,97	1	0,016792	-1,68E-04	-1,04E-04	0,03	0,04394334759	-0,6918777046	FALSE	FALSE
BigCC100_11055	40	0,11	1,01	1,01	0,016536	1,36E-04	1,92E-04	0	0	0,4974996595	FALSE	FALSE
BigCC100_11056	103	0,12	1,01	1,03	0,016512	3,12E-04	1,56E-04	0,02	0,02828904443	-1	FALSE	FALSE
BigCC100_11057	48	0,11	1,01	1,01	0,016664	1,40E-04	1,48E-04	0	0	0,08017034868	FALSE	FALSE
BigCC100_11058	41	0,11	1,01	1,01	0,016796	-2,72E-04	-2,76E-04	0	0	0,02106161553	FALSE	FALSE
BigCC100_11059	41	0,11	1,01	1,02	0,01674	-2,12E-04	-1,56E-04	0,01	0,01421385922	-0,4425182357	FALSE	FALSE
BigCC100_1106	49	0,12	1	1,02	0,016524	-4,00E-06	1,20E-05	0,02	0,0285691522	NA	FALSE	FALSE
BigCC100_11069	54	0,11	1,01	1,01	0,01682	-2,92E-04	1,20E-05	0	0	NA	FALSE	FALSE
BigCC100_1107	87	0,12	1	1,01	0,016608	-7,60E-05	2,04E-04	0,01	0,01435529298	NA	FALSE	FALSE
BigCC100_11070	35	0,11	1	1,01	0,016636	-5,20E-05	1,60E-04	0,01	0,01435529298	NA	FALSE	FALSE
BigCC100_11072	56	0,11	1,01	1,03	0,01682	-3,00E-04	4,00E-05	0,02	0,02828904443	NA	FALSE	FALSE
BigCC100_11073	35	0,11	1,01	1,01	0,016784	2,40E-05	-1,24E-04	0	0	NA	FALSE	FALSE
BigCC100_11074	36	0,11	1,01	1,01	0,016512	2,92E-04	8,00E-06	0	0	-5,189824559	FALSE	FALSE
BigCC100_11075	39	0,12	1	1	0,01652	2,16E-04	2,00E-04	0	0	-0,1110313124	FALSE	FALSE
BigCC100_11084	41	0,11	1,01	1,01	0,016396	4,28E-04	1,56E-04	0	0	-1,456064768	FALSE	FALSE
BigCC100_11088	113	0,12	1	1	0,016744	-2,16E-04	7,20E-05	0	0	NA	FALSE	FALSE
BigCC100_11089	47	0,12	1	1,03	0,016536	1,80E-04	2,84E-04	0,03	0,04264433741	0,6578940232	FALSE	FALSE
BigCC100_1109	65	0,12	1	1	0,016588	2,16E-04	2,48E-04	0	0	0,1993088082	FALSE	FALSE
BigCC100_11094	44	0,11	1,01	1,01	0,016608	2,08E-04	-2,40E-05	0	0	NA	FALSE	FALSE
BigCC100_11096	39	0,11	1,01	1,01	0,016592	-5,20E-05	2,80E-05	0	0	NA	FALSE	FALSE
BigCC100_11097	39	0,12	1	1,02	0,0168	-4,00E-06	-2,04E-04	0,02	0,0285691522	5,672425342	FALSE	FALSE
BigCC100_11098	196	0,12	1	1	0,016544	2,40E-04	1,88E-04	0	0	-0,3523017439	FALSE	FALSE
BigCC100_11099	42	0,12	1	1	0,016516	2,80E-05	2,80E-05	0	0	0	FALSE	FALSE
BigCC100_111	1251	2,04	2,39	9,32	0,022628	0,006468	-4,72E-04	6,93	1,963319337	NA	FALSE	FALSE
BigCC100_11101	40	0,11	1,01	1,03	0,01652	2,84E-04	2,96E-04	0,02	0,02828904443	0,05970624612	FALSE	FALSE
BigCC100_11102	37	0,11	1,01	1,01	0,0168	2,00E-05	-1,80E-04	0	0	NA	FALSE	FALSE
BigCC100_11104	35	0,12	1	1	0,016536	9,60E-05	1,68E-04	0	0	0,8073549221	FALSE	FALSE
BigCC100_11105	42	0,11	1,01	1,01	0,016564	1,48E-04	6,40E-05	0	0	-1,209453366	FALSE	FALSE
BigCC100_11106	45	0,11	1,01	1,03	0,016824	-1,60E-05	-2,68E-04	0,02	0,02828904443	4,06608919	FALSE	FALSE
BigCC100_11108	38	0,11	1,01	1,01	0,016524	1,44E-04	1,40E-04	0	0	-0,0406419845	FALSE	FALSE
BigCC100_11109	33	0,11	1,01	1,01	0,01672	-1,92E-04	-1,32E-04	0	0	-0,5405683814	FALSE	FALSE
BigCC100_11110	36	0,12	1	1	0,016548	2,52E-04	-2,40E-05	0	0	NA	FALSE	FALSE
BigCC100_11111	48	0,11	1,03	1,03	0,01654	1,36E-04	1,60E-05	0	0	-3,087462841	FALSE	FALSE
BigCC100_11114	41	0,12	1	1	0,016564	-4,80E-05	-2,80E-05	0	0	-0,7776075787	FALSE	FALSE
BigCC100_11119	88	0,11	1,01	1,03	0,016544	1,24E-04	2,64E-04	0,02	0,02828904443	1,090197809	FALSE	FALSE
BigCC100_11120	88	0,12	1	1	0,016632	0	-1,00E-04	0	0	NA	FALSE	FALSE
BigCC100_11124	41	0,12	1	1,01	0,0168	2,80E-05	-2,84E-04	0,01	0,01435529298	NA	FALSE	FALSE
BigCC100_11125	68	0,11	1,01	1,01	0,01682	-2,80E-04	1,60E-05	0	0	NA	FALSE	FALSE
BigCC100_11129	38	0,12	1	1,02	0,016736	6,00E-05	-2,08E-04	0,02	0,0285691522	NA	FALSE	FALSE
BigCC100_1113	76	0,11	1,01	1,01	0,016808	-8,00E-06	4,00E-05	0	0	NA	FALSE	FALSE
BigCC100_11130	36	0,12	1	1	0,016796	4,00E-06	2,40E-05	0	0	2,584962501	FALSE	FALSE
BigCC100_11131	34	0,11	1,01	1,01	0,016788	-1,24E-04	-1,92E-04	0	0	0,6307661903	FALSE	FALSE
BigCC100_11133	42	0,12	1	1,02	0,01666	-1,40E-04	-6,40E-05	0,02	0,0285691522	-1,129283017	FALSE	FALSE
BigCC100_11134	54	0,11	1,01	1,01	0,016616	1,92E-04	-3,20E-05	0	0	NA	FALSE	FALSE
BigCC100_11135	66	0,11	1,01	1,01	0,016672	1,36E-04	1,44E-04	0	0	0,08246216019	FALSE	FALSE
BigCC100_11138	41	0,12	1	1,02	0,016612	-2,80E-05	-6,80E-05	0,02	0,0285691522	1,280107919	FALSE	FALSE
BigCC100_11142	41	0,11	1,01	1,01	0,016804	1,20E-05	-2,76E-04	0	0	NA	FALSE	FALSE
BigCC100_11144	38	0,12	1	1	0,016532	7,60E-05	7,20E-05	0	0	-0,078002512	FALSE	FALSE
BigCC100_11150	69	0,11	0,99	1,01	0,01652	3,20E-05	2,92E-04	0,02	0,02885486267	3,189824559	FALSE	FALSE
BigCC100_11152	74	0,12	1,01	1,03	0,016452	1,68E-04	1,12E-04	0,02	0,02828904443	-0,5849625007	FALSE	FALSE
BigCC100_11153	41	0,11	1,01	1,01	0,016676	-9,20E-05	1,68E-04	0	0	NA	FALSE	FALSE
BigCC100_11154	41	0,11	1,01	1,01	0,016732	-4,00E-06	7,20E-05	0	0	NA	FALSE	FALSE
BigCC100_11155	50	0,11	1,01	1,01	0,016588	-4,80E-05	2,08E-04	0	0	NA	FALSE	FALSE
BigCC100_11156	77	0,11	1	1,03	0,0165	3,04E-04	1,20E-04	0,03	0,04264433741	-1,341036918	FALSE	FALSE
BigCC100_11158	48	0,11	1,01	1,01	0,01652	4,00E-06	0	0	0	-Inf	FALSE	FALSE
BigCC100_11163	57	0,11	0,99	1,01	0,016552	2,36E-04	7,60E-05	0,02	0,02885486267	-1,634715536	FALSE	FALSE
BigCC100_11165	56	0,1	1,02	1,02	0,01672	-1,28E-04	-8,80E-05	0	0	-0,5405683814	FALSE	FALSE
BigCC100_11167	52	0,11	1,01	1,01	0,016788	-1,20E-04	-4,80E-05	0	0	-1,321928095	FALSE	FALSE
BigCC100_11169	36	0,12	1	1,02	0,016516	2,80E-05	3,20E-04	0,02	0,0285691522	3,514573173	FALSE	FALSE
BigCC100_1117	33	0,11	1,01	1,01	0,016588	0	1,20E-05	0	0	Inf	FALSE	FALSE
BigCC100_11171	47	0,11	1,01	1,01	0,016528	-4,00E-06	1,48E-04	0	0	NA	FALSE	FALSE
BigCC100_11175	48	0,11	1,01	1,03	0,01662	-9,20E-05	-7,20E-05	0,02	0,02828904443	-0,3536369546	FALSE	FALSE
BigCC100_1118	36	0,11	1,01	1,01	0,016808	1,20E-05	-2,88E-04	0	0	NA	FALSE	FALSE
BigCC100_11183	106	0,11	1,02	1,03	0,01674	7,60E-05	7,60E-05	0,01	0,01407518521	0	FALSE	FALSE
BigCC100_11186	73	0,12	1	1	0,01672	-5,60E-05	1,00E-04	0	0	NA	FALSE	FALSE
BigCC100_1119	50	0,11	1,01	1,01	0,016548	2,44E-04	7,60E-05	0	0	-1,682809824	FALSE	FALSE
BigCC100_11198	48	0,11	1,01	1,03	0,016632	-8,00E-06	-8,40E-05	0,02	0,02828904443	3,392317423	FALSE	FALSE
BigCC100_112	6929	8,79	21,01	28,02	0,070384	0,189412	0,001028	7,01	0,4153807938	-7,525543659	FALSE	FALSE
BigCC100_1120	71	0,11	1,01	1,01	0,01656	4,00E-05	7,60E-05	0	0	0,9259994186	FALSE	FALSE
BigCC100_1121	36	0,11	1,01	1,03	0,016672	-1,48E-04	1,40E-04	0,02	0,02828904443	NA	FALSE	FALSE
BigCC100_11228	60	0,11	1,01	1,03	0,016608	1,80E-04	4,00E-06	0,02	0,02828904443	-5,491853096	FALSE	FALSE
BigCC100_1123	34	0,11	1,01	1,01	0,016668	1,44E-04	1,68E-04	0	0	0,2223924213	FALSE	FALSE
BigCC100_11233	32	0,11	1,01	1,01	0,01682	-1,88E-04	-3,00E-04	0	0	0,6742298388	FALSE	FALSE
BigCC100_11234	36	0,12	1	1,02	0,016516	3,04E-04	3,20E-04	0,02	0,0285691522	0,07400058144	FALSE	FALSE
BigCC100_11237	31	0,11	1,01	1,01	0,016804	-2,68E-04	1,20E-05	0	0	NA	FALSE	FALSE
BigCC100_11248	42	0,13	0,99	0,99	0,016564	-3,20E-05	2,28E-04	0	0	NA	FALSE	FALSE
BigCC100_1125	57	0,12	1	1	0,01658	8,00E-06	2,32E-04	0	0	4,857980995	FALSE	FALSE
BigCC100_11270	31	0,11	1,01	1,01	0,01652	6,80E-05	2,76E-04	0	0	2,021061616	FALSE	FALSE
BigCC100_11274	65	0,12	1	1,02	0,016712	2,40E-05	-1,56E-04	0,02	0,0285691522	NA	FALSE	FALSE
BigCC100_1129	54	0,11	1,01	1,01	0,016732	-1,52E-04	9,20E-05	0	0	NA	FALSE	FALSE
BigCC100_113	2342	2,83	3,88	6,85	0,02806	0,022204	4,16E-04	2,97	0,8200473357	-5,73809226	FALSE	FALSE
BigCC100_11315	46	0,11	1,03	1,01	0,016792	-2,60E-04	4,40E-05	-0,02	-0,02828904443	NA	FALSE	FALSE
BigCC100_1132	85	0,12	1	1,02	0,016584	-2,40E-05	7,20E-05	0,02	0,0285691522	NA	FALSE	FALSE
BigCC100_1133	455	0,14	1,03	1,02	0,016812	-1,40E-04	-2,12E-04	-0,01	-0,01407518521	0,5986374376	FALSE	FALSE
BigCC100_1134	31	0,11	1,01	1,01	0,016808	-1,80E-04	-2,08E-04	0	0	0,2085866218	FALSE	FALSE
BigCC100_11360	34	0,11	1,01	1,01	0,016624	-2,00E-05	-8,00E-05	0	0	2	FALSE	FALSE
BigCC100_114	623	0,17	1,05	1,09	0,016612	1,64E-04	-6,80E-05	0,04	0,05393880711	NA	FALSE	FALSE
BigCC100_1141	44	0,14	0,98	0,98	0,016596	1,92E-04	2,80E-05	0	0	-2,777607579	FALSE	FALSE
BigCC100_11436	119	0,12	1,01	1,01	0,016468	6,80E-05	2,56E-04	0	0	1,912537159	FALSE	FALSE
BigCC100_11437	256	0,14	1,04	2,04	0,01682	-1,48E-04	-2,40E-04	1	0,9719856238	0,69743723	FALSE	FALSE
BigCC100_11438	44	0,12	1	1,02	0,016544	8,40E-05	2,76E-04	0,02	0,0285691522	1,716207034	FALSE	FALSE
BigCC100_11440	53	0,12	1	1	0,016732	-2,08E-04	7,20E-05	0	0	NA	FALSE	FALSE
BigCC100_11441	108	0,12	1,02	1,02	0,016532	-8,00E-06	7,20E-05	0	0	NA	FALSE	FALSE
BigCC100_11443	41	0,11	1,01	1,03	0,01654	1,12E-04	7,60E-05	0,02	0,02828904443	-0,5594274086	FALSE	FALSE
BigCC100_11444	69	0,11	0,99	1,01	0,016528	2,84E-04	3,00E-04	0,02	0,02885486267	0,07907157099	FALSE	FALSE
BigCC100_11446	54	0,12	1	1	0,016572	1,44E-04	2,36E-04	0	0	0,7127180479	FALSE	FALSE
BigCC100_11447	42	0,11	1,01	1,01	0,0168	8,00E-06	-2,72E-04	0	0	NA	FALSE	FALSE
BigCC100_11450	36	0,11	1,01	1,03	0,016668	-1,36E-04	0	0,02	0,02828904443	-Inf	FALSE	FALSE
BigCC100_11453	49	0,12	1	1	0,016816	-2,00E-04	1,20E-05	0	0	NA	FALSE	FALSE
BigCC100_11454	35	0,11	1,01	1,03	0,016532	2,72E-04	-2,40E-05	0,02	0,02828904443	NA	FALSE	FALSE
BigCC100_11459	112	0,13	1	1,03	0,016788	2,40E-05	-1,20E-04	0,03	0,04264433741	NA	FALSE	FALSE
BigCC100_1146	159	0,12	1	1	0,016732	-2,24E-04	-1,52E-04	0	0	-0,5594274086	FALSE	FALSE
BigCC100_11460	31	0,12	1	1	0,016772	-1,04E-04	-1,48E-04	0	0	0,5090136475	FALSE	FALSE
BigCC100_11466	80	0,11	1,01	1,01	0,016808	-2,12E-04	2,80E-05	0	0	NA	FALSE	FALSE
BigCC100_11467	40	0,12	1	1	0,016628	1,76E-04	-4,00E-05	0	0	NA	FALSE	FALSE
BigCC100_11473	38	0,11	0,99	1,01	0,016664	7,20E-05	-1,16E-04	0,02	0,02885486267	NA	FALSE	FALSE
BigCC100_11476	35	0,11	1,01	1,01	0,016808	-2,08E-04	-1,64E-04	0	0	-0,3428877135	FALSE	FALSE
BigCC100_11478	89	0,12	1	0,99	0,0166	-6,80E-05	6,40E-05	-0,01	-0,0144995697	NA	FALSE	FALSE
BigCC100_11480	41	0,12	1	1	0,0165	8,80E-05	8,80E-05	0	0	0	FALSE	FALSE
BigCC100_11489	39	0,12	1	1,02	0,016516	2,92E-04	3,20E-05	0,02	0,0285691522	-3,189824559	FALSE	FALSE
BigCC100_11493	35	0,11	1,01	1,01	0,01654	2,80E-04	3,00E-04	0	0	0,09953567355	FALSE	FALSE
BigCC100_115	1988	2,11	2,4	5,95	0,02086	0,018408	3,44E-04	3,55	1,309855263	-5,741780514	FALSE	FALSE
BigCC100_1150	979	0,19	1,06	2,01	0,0166	-5,60E-05	2,24E-04	0,95	0,9231312366	NA	FALSE	FALSE
BigCC100_11506	75	0,11	1,01	1,03	0,016536	9,20E-05	2,28E-04	0,02	0,02828904443	1,309328058	FALSE	FALSE
BigCC100_11508	60	0,11	1,01	1,01	0,016564	1,80E-04	2,44E-04	0	0	0,4388842412	FALSE	FALSE
BigCC100_1151	43	0,12	1	1	0,016656	-1,20E-04	-4,40E-05	0	0	-1,447458977	FALSE	FALSE
BigCC100_11512	31	0,11	1,01	1,01	0,016524	7,20E-05	2,96E-04	0	0	2,039528364	FALSE	FALSE
BigCC100_11516	66	0,12	1	1,01	0,016724	-9,60E-05	-1,84E-04	0,01	0,01435529298	0,9385994553	FALSE	FALSE
BigCC100_11518	32	0,11	1,01	0,99	0,016752	-3,20E-05	-2,04E-04	-0,02	-0,02885486267	2,672425342	FALSE	FALSE
BigCC100_1152	40	0,12	1	1,03	0,016636	-2,40E-05	1,96E-04	0,03	0,04264433741	NA	FALSE	FALSE
BigCC100_11539	52	0,11	1,01	1,03	0,016592	-5,60E-05	2,36E-04	0,02	0,02828904443	NA	FALSE	FALSE
BigCC100_1154	38	0,11	1,01	0,99	0,0166	2,08E-04	2,16E-04	-0,02	-0,02885486267	0,05444778402	FALSE	FALSE
BigCC100_11540	35	0,11	1,01	1,03	0,016668	1,60E-04	-1,28E-04	0,02	0,02828904443	NA	FALSE	FALSE
BigCC100_11557	47	0,12	1	1,02	0,016816	-2,40E-05	-2,64E-04	0,02	0,0285691522	3,459431619	FALSE	FALSE
BigCC100_1156	50	0,11	1,01	0,99	0,01652	1,48E-04	9,20E-05	-0,02	-0,02885486267	-0,6858914096	FALSE	FALSE
BigCC100_11579	34	0,11	1,01	1,01	0,016812	-1,36E-04	1,60E-05	0	0	NA	FALSE	FALSE
BigCC100_1158	46	0,12	1	1,02	0,016604	3,20E-05	4,40E-05	0,02	0,0285691522	0,4594316186	FALSE	FALSE
BigCC100_11594	86	0,12	1	1,03	0,016792	-1,80E-04	-1,04E-04	0,03	0,04264433741	-0,7914133782	FALSE	FALSE
BigCC100_11595	72	0,11	1,01	1,01	0,016664	1,60E-04	4,80E-05	0	0	-1,736965594	FALSE	FALSE
BigCC100_116	690	0,53	1,33	11,41	0,01654	-2,80E-05	5,60E-05	10,08	3,100800641	NA	FALSE	FALSE
BigCC100_1160	34	0,13	0,99	0,98	0,016592	8,40E-05	9,20E-05	-0,01	-0,01464677596	0,1312445333	FALSE	FALSE
BigCC100_11605	34	0,11	1,01	1,03	0,016616	1,08E-04	-1,04E-04	0,02	0,02828904443	NA	FALSE	FALSE
BigCC100_11606	58	0,11	1,01	1,01	0,016536	4,80E-05	2,80E-04	0	0	2,544320516	FALSE	FALSE
BigCC100_11608	129	0,12	1,01	1,05	0,016736	-1,92E-04	-2,12E-04	0,04	0,05603403491	0,1429579538	FALSE	FALSE
BigCC100_1161	214	0,13	1,02	1,01	0,016668	-5,60E-05	-7,60E-05	-0,01	-0,01421385922	0,4405725914	FALSE	FALSE
BigCC100_1162	56	0,11	1,01	1,01	0,0166	1,40E-04	2,44E-04	0	0	0,8014543206	FALSE	FALSE
BigCC100_11626	38	0,11	1	1,02	0,016536	5,20E-05	2,04E-04	0,02	0,0285691522	1,971985624	FALSE	FALSE
BigCC100_1163	66	0,11	1,01	0,99	0,016792	4,00E-05	-1,72E-04	-0,02	-0,02885486267	NA	FALSE	FALSE
BigCC100_11637	31	0,11	1,01	1,03	0,016816	-2,08E-04	2,40E-05	0,02	0,02828904443	NA	FALSE	FALSE
BigCC100_1164	137	0,12	1,03	1,01	0,01658	2,52E-04	2,44E-04	-0,02	-0,02828904443	-0,04654258594	FALSE	FALSE
BigCC100_11646	40	0,11	1,01	0,99	0,0168	-8,00E-05	-1,08E-04	-0,02	-0,02885486267	0,4329594073	FALSE	FALSE
BigCC100_11649	76	0,12	1	1,03	0,016492	2,92E-04	2,60E-04	0,03	0,04264433741	-0,1674567459	FALSE	FALSE
BigCC100_1167	60	0,12	1	1,02	0,016452	6,00E-05	3,72E-04	0,02	0,0285691522	2,632268215	FALSE	FALSE
BigCC100_1168	33	0,13	0,99	1,01	0,01662	-3,20E-05	-4,00E-06	0,02	0,02885486267	-3	FALSE	FALSE
BigCC100_11687	115	0,12	1,01	1,03	0,016528	1,88E-04	2,96E-04	0,02	0,02828904443	0,654864514	FALSE	FALSE
BigCC100_11689	43	0,11	1,01	0,99	0,016532	8,00E-06	3,12E-04	-0,02	-0,02885486267	5,285402219	FALSE	FALSE
BigCC100_1169	144	0,14	1,02	1,05	0,016824	-1,20E-05	-1,20E-05	0,03	0,04182017569	0	FALSE	FALSE
BigCC100_11690	421	0,19	1,06	2,06	0,0168	-2,76E-04	5,20E-05	1	0,9585800726	NA	FALSE	FALSE
BigCC100_11693	44	0,12	1	1,02	0,016712	1,08E-04	-1,68E-04	0,02	0,0285691522	NA	FALSE	FALSE
BigCC100_11698	49	0,11	1,01	1,02	0,016636	1,88E-04	1,92E-04	0,01	0,01421385922	0,03037364904	FALSE	FALSE
BigCC100_117	985	0,42	1,25	10,38	0,016604	2,24E-04	1,60E-05	9,13	3,053806444	-3,807354922	FALSE	FALSE
BigCC100_1170	112	0,13	1	1	0,0168	-2,68E-04	-6,00E-05	0	0	-2,159198595	FALSE	FALSE
BigCC100_11700	43	0,12	1	1,02	0,016528	5,20E-05	2,76E-04	0,02	0,0285691522	2,408084739	FALSE	FALSE
BigCC100_11701	62	0,12	1	0,99	0,016832	-1,20E-05	-2,48E-04	-0,01	-0,0144995697	4,36923381	FALSE	FALSE
BigCC100_11703	39	0,12	1	1,02	0,016672	6,40E-05	1,40E-04	0,02	0,0285691522	1,129283017	FALSE	FALSE
BigCC100_11704	90	0,12	1,03	1,01	0,016676	1,52E-04	1,60E-04	-0,02	-0,02828904443	0,07400058144	FALSE	FALSE
BigCC100_11705	33	0,12	1	1,01	0,01654	-8,00E-06	1,12E-04	0,01	0,01435529298	NA	FALSE	FALSE
BigCC100_11706	117	0,11	1,01	1	0,016816	-1,52E-04	4,00E-06	-0,01	-0,01435529298	NA	FALSE	FALSE
BigCC100_11709	88	0,12	1	1,03	0,016536	6,00E-05	-1,60E-05	0,03	0,04264433741	NA	FALSE	FALSE
BigCC100_11710	33	0,11	1,01	1,01	0,016632	4,40E-05	1,76E-04	0	0	2	FALSE	FALSE
BigCC100_11711	45	0,11	1,01	1,04	0,016776	4,00E-05	-1,80E-04	0,03	0,04222823539	NA	FALSE	FALSE
BigCC100_11716	97	0,12	1,01	1,03	0,016544	9,20E-05	-2,40E-05	0,02	0,02828904443	NA	FALSE	FALSE
BigCC100_11719	50	0,12	1	1,01	0,016528	2,64E-04	6,00E-05	0,01	0,01435529298	-2,137503524	FALSE	FALSE
BigCC100_11721	32	0,11	1,01	0,99	0,01684	-2,16E-04	-2,96E-04	-0,02	-0,02885486267	0,4545658635	FALSE	FALSE
BigCC100_11725	54	0,11	1,01	1,04	0,016808	-2,80E-04	-6,00E-05	0,03	0,04222823539	-2,222392421	FALSE	FALSE
BigCC100_11726	31	0,11	1,01	1,01	0,016768	-1,52E-04	6,00E-05	0	0	NA	FALSE	FALSE
BigCC100_11729	36	0,11	1,01	1,03	0,016744	-1,28E-04	-5,20E-05	0,02	0,02828904443	-1,299560282	FALSE	FALSE
BigCC100_11731	81	0,14	0,98	1,01	0,01646	3,48E-04	1,52E-04	0,03	0,04350163864	-1,195015982	FALSE	FALSE
BigCC100_11732	32	0,12	1	1	0,016804	8,00E-06	4,00E-05	0	0	2,321928095	FALSE	FALSE
BigCC100_11733	73	0,12	1	1,02	0,016664	-3,60E-05	2,40E-05	0,02	0,0285691522	NA	FALSE	FALSE
BigCC100_11734	46	0,11	1,01	1,01	0,016464	1,56E-04	2,72E-04	0	0	0,8020606224	FALSE	FALSE
BigCC100_11737	51	0,12	1	1,02	0,01674	-1,96E-04	-8,00E-06	0,02	0,0285691522	-4,614709844	FALSE	FALSE
BigCC100_11739	66	0,11	1,01	1	0,016544	2,56E-04	-4,00E-06	-0,01	-0,01435529298	NA	FALSE	FALSE
BigCC100_11740	69	0,11	1,01	1,01	0,016752	-1,20E-04	-2,04E-04	0	0	0,7655347464	FALSE	FALSE
BigCC100_11741	83	0,12	1	1,02	0,016824	-1,04E-04	-2,64E-04	0,02	0,0285691522	1,343954401	FALSE	FALSE
BigCC100_11742	74	0,11	1,01	0,99	0,016632	-2,40E-05	-1,04E-04	-0,02	-0,02885486267	2,115477217	FALSE	FALSE
BigCC100_11743	47	0,12	1	1,02	0,01658	-4,00E-06	4,40E-05	0,02	0,0285691522	NA	FALSE	FALSE
BigCC100_11744	84	0,12	1	1	0,016632	-3,60E-05	-1,20E-04	0	0	1,736965594	FALSE	FALSE
BigCC100_11745	132	0,12	1	1,02	0,016548	8,00E-05	-2,00E-05	0,02	0,0285691522	NA	FALSE	FALSE
BigCC100_11749	62	0,11	1,01	1,03	0,016708	-1,68E-04	6,00E-05	0,02	0,02828904443	NA	FALSE	FALSE
BigCC100_11767	70	0,11	1,01	1,01	0,016808	-1,80E-04	-5,60E-05	0	0	-1,684498174	FALSE	FALSE
BigCC100_11768	50	0,12	0,99	1,01	0,016812	-2,20E-04	-2,12E-04	0,02	0,02885486267	-0,05343925896	FALSE	FALSE
BigCC100_1177	583	0,14	1,01	0,99	0,016816	-2,00E-04	4,40E-05	-0,02	-0,02885486267	NA	FALSE	FALSE
BigCC100_11779	71	0,11	0,99	1,03	0,016716	-8,80E-05	-2,40E-05	0,04	0,0571439071	-1,874469118	FALSE	FALSE
BigCC100_1179	49	0,11	1,01	1,03	0,016816	-2,28E-04	-2,72E-04	0,02	0,02828904443	0,2545728271	FALSE	FALSE
BigCC100_118	589	0,23	1,09	5,14	0,016748	-7,60E-05	-1,56E-04	4,05	2,237440224	1,037474705	FALSE	FALSE
BigCC100_1180	93	0,11	1,01	0,99	0,016516	6,80E-05	3,20E-04	-0,02	-0,02885486267	2,234465254	FALSE	FALSE
BigCC100_1181	57	0,11	1,01	1,03	0,016616	9,20E-05	-6,80E-05	0,02	0,02828904443	NA	FALSE	FALSE
BigCC100_1183	67	0,11	1,01	1,03	0,016524	2,96E-04	1,64E-04	0,02	0,02828904443	-0,851901361	FALSE	FALSE
BigCC100_11837	85	0,12	1,01	1	0,016632	1,56E-04	2,28E-04	-0,01	-0,01435529298	0,5474877953	FALSE	FALSE
BigCC100_1184	263	0,12	1,02	1,05	0,016712	1,12E-04	-6,80E-05	0,03	0,04182017569	NA	FALSE	FALSE
BigCC100_1185	76	0,12	1	0,98	0,016612	-1,60E-05	-7,60E-05	-0,02	-0,02914634566	2,247927513	FALSE	FALSE
BigCC100_11850	57	0,12	1	1,03	0,016808	-2,92E-04	-2,16E-04	0,03	0,04264433741	-0,4349370567	FALSE	FALSE
BigCC100_11851	31	0,12	1	1	0,016528	2,00E-05	3,20E-04	0	0	4	FALSE	FALSE
BigCC100_11865	32	0,11	1,01	1	0,016588	2,04E-04	-4,00E-05	-0,01	-0,01435529298	NA	FALSE	FALSE
BigCC100_11878	138	0,12	1,02	1	0,01654	2,72E-04	8,00E-06	-0,02	-0,0285691522	-5,087462841	FALSE	FALSE
BigCC100_119	551	0,45	1,25	7,41	0,016804	-5,20E-05	4,00E-05	6,16	2,567545448	NA	FALSE	FALSE
BigCC100_1195	83	0,12	1,01	1	0,016668	1,28E-04	7,20E-05	-0,01	-0,01435529298	-0,8300749986	FALSE	FALSE
BigCC100_1196	68	0,12	1,01	1,03	0,016496	4,80E-05	2,00E-04	0,02	0,02828904443	2,058893689	FALSE	FALSE
BigCC100_1197	83	0,13	1,01	1,02	0,016716	-8,40E-05	-1,28E-04	0,01	0,01421385922	0,6076825772	FALSE	FALSE
BigCC100_1198	68	0,14	0,99	0,97	0,016808	-2,72E-04	1,60E-05	-0,02	-0,02944377789	NA	FALSE	FALSE
BigCC100_11995	31	0,11	1,01	1,04	0,016564	2,52E-04	1,00E-04	0,03	0,04222823539	-1,333423734	FALSE	FALSE
BigCC100_12	1791	4,09	4,8	40,44	0,033284	0,015116	4,72E-04	35,64	3,074676686	-5,001145754	FALSE	FALSE
BigCC100_120	91	0,12	1,03	1,01	0,016784	-2,56E-04	6,00E-05	-0,02	-0,02828904443	NA	FALSE	FALSE
BigCC100_1200	112	0,12	1,01	1,03	0,016504	8,00E-06	3,16E-04	0,02	0,02828904443	5,303780748	FALSE	FALSE
BigCC100_1202	64	0,11	1,02	1,04	0,016428	3,28E-04	4,20E-04	0,02	0,02801437617	0,356693513	FALSE	FALSE
BigCC100_12021	85	0,13	0,99	0,99	0,01662	4,00E-06	1,36E-04	0	0	5,087462841	FALSE	FALSE
BigCC100_12046	54	0,11	1,01	1,03	0,01652	1,16E-04	2,96E-04	0,02	0,02828904443	1,351472371	FALSE	FALSE
BigCC100_12047	40	0,12	1	1	0,016616	-9,20E-05	-9,60E-05	0	0	0,06140054466	FALSE	FALSE
BigCC100_12048	74	0,11	1,01	1,03	0,016616	2,00E-05	1,88E-04	0,02	0,02828904443	3,232660757	FALSE	FALSE
BigCC100_12051	41	0,11	1,01	1,01	0,016528	1,04E-04	1,84E-04	0	0	0,8231222379	FALSE	FALSE
BigCC100_12057	214	0,14	1,03	1,06	0,01662	-4,00E-05	-1,16E-04	0,03	0,04141992738	1,5360529	FALSE	FALSE
BigCC100_12066	60	0,12	1	1	0,016612	1,76E-04	1,44E-04	0	0	-0,2895066172	FALSE	FALSE
BigCC100_12068	43	0,11	1,01	1,02	0,016524	8,00E-05	3,16E-04	0,01	0,01421385922	1,981852653	FALSE	FALSE
BigCC100_12073	36	0,11	0,98	1,03	0,016524	7,20E-05	5,60E-05	0,05	0,07179068307	-0,3625700794	FALSE	FALSE
BigCC100_121	616	0,49	1,26	23,34	0,01674	5,20E-05	-2,20E-04	22,08	4,211308922	NA	FALSE	FALSE
BigCC100_1211	822	0,19	1,06	2,01	0,016712	-4,80E-05	-1,52E-04	0,95	0,9231312366	1,662965013	FALSE	FALSE
BigCC100_1212	67	0,11	1,01	1,03	0,016532	4,80E-05	2,88E-04	0,02	0,02828904443	2,584962501	FALSE	FALSE
BigCC100_12124	32	0,12	1,01	1	0,016668	5,60E-05	-1,08E-04	-0,01	-0,01435529298	NA	FALSE	FALSE
BigCC100_12131	33	0,11	1,01	0,99	0,016796	-2,00E-04	-1,84E-04	-0,02	-0,02885486267	-0,1202942337	FALSE	FALSE
BigCC100_12178	42	0,11	1,01	1,01	0,01652	2,80E-05	3,08E-04	0	0	3,459431619	FALSE	FALSE
BigCC100_12179	40	0,11	1,01	1,02	0,016524	1,44E-04	8,00E-06	0,01	0,01421385922	-4,169925001	FALSE	FALSE
BigCC100_1218	75	0,11	1,01	1	0,016524	2,08E-04	3,00E-04	-0,01	-0,01435529298	0,5283789724	FALSE	FALSE
BigCC100_12180	97	0,12	1,01	1,04	0,016816	-1,88E-04	4,00E-05	0,03	0,04222823539	NA	FALSE	FALSE
BigCC100_12182	61	0,12	1	1,02	0,016676	1,48E-04	-9,20E-05	0,02	0,0285691522	NA	FALSE	FALSE
BigCC100_12183	94	0,11	1,01	0,99	0,016796	-1,28E-04	2,00E-05	-0,02	-0,02885486267	NA	FALSE	FALSE
BigCC100_12188	47	0,11	1,01	1,03	0,016628	4,40E-05	6,00E-05	0,02	0,02828904443	0,447458977	FALSE	FALSE
BigCC100_12189	43	0,12	1	0,98	0,016668	6,00E-05	0	-0,02	-0,02914634566	-Inf	FALSE	FALSE
BigCC100_12190	36	0,11	1,01	1,03	0,016532	-4,00E-06	2,80E-04	0,02	0,02828904443	NA	FALSE	FALSE
BigCC100_12194	43	0,11	1,01	1	0,016548	2,76E-04	1,44E-04	-0,01	-0,01435529298	-0,9385994553	FALSE	FALSE
BigCC100_12195	60	0,11	1,01	1,03	0,01682	-3,20E-05	-7,20E-05	0,02	0,02828904443	1,169925001	FALSE	FALSE
BigCC100_12199	102	0,12	0,98	1,03	0,016804	-2,72E-04	3,20E-05	0,05	0,07179068307	NA	FALSE	FALSE
BigCC100_122	4072	3,88	9,34	9,53	0,05342	0,065244	0,001176	0,19	0,0290536642	-5,793885269	FALSE	FALSE
BigCC100_1221	95	0,14	0,98	1,01	0,016524	2,96E-04	7,60E-05	0,03	0,04350163864	-1,961525852	FALSE	FALSE
BigCC100_12215	32	0,11	1,01	1,02	0,016516	2,96E-04	3,28E-04	0,01	0,01421385922	0,148098639	FALSE	FALSE
BigCC100_12218	35	0,11	1,01	1	0,0168	-2,84E-04	-2,16E-04	-0,01	-0,01435529298	-0,3948596173	FALSE	FALSE
BigCC100_12219	48	0,12	1	1,03	0,016732	-6,00E-05	-1,80E-04	0,03	0,04264433741	1,584962501	FALSE	FALSE
BigCC100_12220	49	0,11	1,01	1,03	0,016604	-8,80E-05	-5,60E-05	0,02	0,02828904443	-0,6520766966	FALSE	FALSE
BigCC100_12221	55	0,11	1,01	0,99	0,016792	-1,84E-04	-2,36E-04	-0,02	-0,02885486267	0,3590810933	FALSE	FALSE
BigCC100_12223	57	0,14	0,98	1,01	0,016812	-9,60E-05	4,00E-05	0,03	0,04350163864	NA	FALSE	FALSE
BigCC100_12226	53	0,11	1,01	1,01	0,01682	-3,00E-04	-6,40E-05	0	0	-2,22881869	FALSE	FALSE
BigCC100_1223	123	0,13	1	1,02	0,016812	-1,40E-04	3,20E-05	0,02	0,0285691522	NA	FALSE	FALSE
BigCC100_12230	50	0,11	1,01	0,99	0,016828	-3,20E-05	-3,04E-04	-0,02	-0,02885486267	3,247927513	FALSE	FALSE
BigCC100_12231	35	0,11	1,01	1,03	0,016712	0	1,40E-04	0,02	0,02828904443	Inf	FALSE	FALSE
BigCC100_12236	40	0,11	1,01	1,03	0,016608	-9,20E-05	4,00E-05	0,02	0,02828904443	NA	FALSE	FALSE
BigCC100_12237	72	0,12	1	0,99	0,016528	1,88E-04	1,20E-05	-0,01	-0,0144995697	-3,969626351	FALSE	FALSE
BigCC100_12239	42	0,11	1,01	1,03	0,01682	-1,60E-05	2,80E-05	0,02	0,02828904443	NA	FALSE	FALSE
BigCC100_1224	42	0,11	0,98	1,01	0,016588	1,92E-04	1,72E-04	0,03	0,04350163864	-0,158697746	FALSE	FALSE
BigCC100_12251	66	0,11	1,01	1,04	0,016636	1,04E-04	-1,28E-04	0,03	0,04222823539	NA	FALSE	FALSE
BigCC100_12252	91	0,11	1,01	1,01	0,016584	2,28E-04	2,72E-04	0	0	0,2545728271	FALSE	FALSE
BigCC100_12254	45	0,11	1,02	1,02	0,01674	-1,16E-04	-4,00E-05	0	0	-1,5360529	FALSE	FALSE
BigCC100_12255	45	0,11	1,01	0,99	0,016812	-2,68E-04	-2,64E-04	-0,02	-0,02885486267	-0,0216950711	FALSE	FALSE
BigCC100_12257	44	0,11	1,01	1,03	0,016796	-8,40E-05	6,00E-05	0,02	0,02828904443	NA	FALSE	FALSE
BigCC100_12259	72	0,11	1,01	1,01	0,01672	8,80E-05	1,00E-04	0	0	0,1844245711	FALSE	FALSE
BigCC100_1226	41	0,11	1,02	1,03	0,016812	-9,60E-05	-4,80E-05	0,01	0,01407518521	-1	FALSE	FALSE
BigCC100_12261	48	0,11	1,01	1	0,016608	2,40E-05	2,20E-04	-0,01	-0,01435529298	3,196397213	FALSE	FALSE
BigCC100_1227	38	0,14	0,98	0,98	0,016472	3,36E-04	6,00E-05	0	0	-2,485426827	FALSE	FALSE
BigCC100_12270	36	0,11	1,01	1,03	0,0166	2,12E-04	-1,20E-05	0,02	0,02828904443	NA	FALSE	FALSE
BigCC100_12271	41	0,11	1,01	0,99	0,016592	-4,80E-05	2,40E-04	-0,02	-0,02885486267	NA	FALSE	FALSE
BigCC100_12273	35	0,11	1,01	1,03	0,016804	-1,72E-04	-2,80E-04	0,02	0,02828904443	0,7030182622	FALSE	FALSE
BigCC100_1229	40	0,11	1,01	1,01	0,016648	1,88E-04	9,60E-05	0	0	-0,969626351	FALSE	FALSE
BigCC100_12293	52	0,11	1,01	1,04	0,016528	0	8,80E-05	0,03	0,04222823539	Inf	FALSE	FALSE
BigCC100_123	1278	1,28	1,83	5,3	0,01674	0,0019	1,00E-04	3,47	1,534148711	-4,247927513	FALSE	FALSE
BigCC100_12309	31	0,11	1,02	1,01	0,016824	-2,96E-04	-2,28E-04	-0,01	-0,01421385922	-0,3765633515	FALSE	FALSE
BigCC100_1231	107	0,14	0,99	1,01	0,01658	5,60E-05	2,52E-04	0,02	0,02885486267	2,169925001	FALSE	FALSE
BigCC100_12312	40	0,11	1,01	0,99	0,01678	-2,56E-04	-1,16E-04	-0,02	-0,02885486267	-1,142019005	FALSE	FALSE
BigCC100_1232	60	0,12	1	1	0,016808	-2,76E-04	1,60E-05	0	0	NA	FALSE	FALSE
BigCC100_12329	71	0,11	1,01	0,99	0,016828	-1,08E-04	-1,40E-04	-0,02	-0,02885486267	0,3743955148	FALSE	FALSE
BigCC100_12333	94	0,12	1,01	1,03	0,016532	1,44E-04	2,84E-04	0,02	0,02828904443	0,9798221181	FALSE	FALSE
BigCC100_12334	73	0,12	1,01	1,01	0,016532	1,20E-05	2,88E-04	0	0	4,584962501	FALSE	FALSE
BigCC100_12335	88	0,12	1	1,02	0,01682	-9,60E-05	-8,00E-06	0,02	0,0285691522	-3,584962501	FALSE	FALSE
BigCC100_12336	64	0,11	1,01	0,99	0,016736	4,80E-05	8,40E-05	-0,02	-0,02885486267	0,8073549221	FALSE	FALSE
BigCC100_12337	41	0,11	0,99	1,03	0,016572	2,36E-04	2,56E-04	0,04	0,0571439071	0,1173569506	FALSE	FALSE
BigCC100_12338	84	0,14	0,99	0,99	0,016632	1,80E-04	2,04E-04	0	0	0,1805722456	FALSE	FALSE
BigCC100_12339	31	0,11	1,01	1,03	0,016572	-3,60E-05	-2,00E-05	0,02	0,02828904443	-0,8479969066	FALSE	FALSE
BigCC100_12345	47	0,12	1	1,03	0,016808	-2,68E-04	2,00E-05	0,03	0,04264433741	NA	FALSE	FALSE
BigCC100_12346	188	0,13	0,99	1,02	0,016816	-3,04E-04	-6,40E-05	0,03	0,04306872189	-2,247927513	FALSE	FALSE
BigCC100_12347	130	0,13	1,01	1,04	0,01674	-1,24E-04	7,60E-05	0,03	0,04222823539	NA	FALSE	FALSE
BigCC100_12348	70	0,15	0,97	0,96	0,016632	1,76E-04	-8,80E-05	-0,01	-0,01495034147	NA	FALSE	FALSE
BigCC100_12349	231	0,13	1,01	1,04	0,01674	-1,04E-04	-1,96E-04	0,03	0,04222823539	0,914270126	FALSE	FALSE
BigCC100_12350	36	0,11	1,01	1,01	0,016808	-2,84E-04	-2,20E-04	0	0	-0,368387406	FALSE	FALSE
BigCC100_12351	79	0,12	1	1,02	0,016544	2,04E-04	2,00E-04	0,02	0,0285691522	-0,0285691522	FALSE	FALSE
BigCC100_12353	82	0,12	1,01	0,99	0,016608	1,20E-04	1,32E-04	-0,02	-0,02885486267	0,1375035237	FALSE	FALSE
BigCC100_12354	88	0,13	1	1,03	0,01678	-2,00E-04	4,80E-05	0,03	0,04264433741	NA	FALSE	FALSE
BigCC100_12355	133	0,12	1,01	1,01	0,016596	1,20E-04	7,20E-05	0	0	-0,7369655942	FALSE	FALSE
BigCC100_12356	112	0,12	1,02	1,04	0,016716	-8,80E-05	9,20E-05	0,02	0,02801437617	NA	FALSE	FALSE
BigCC100_12357	112	0,12	1	1	0,016532	1,40E-04	6,00E-05	0	0	-1,222392421	FALSE	FALSE
BigCC100_12359	82	0,12	1,01	1,04	0,01652	1,56E-04	1,40E-04	0,03	0,04222823539	-0,1561192019	FALSE	FALSE
BigCC100_12360	31	0,11	1,01	1,01	0,016532	8,00E-06	3,20E-05	0	0	2	FALSE	FALSE
BigCC100_12361	44	0,12	1	1,02	0,016712	2,00E-05	-1,64E-04	0,02	0,0285691522	NA	FALSE	FALSE
BigCC100_12363	115	0,12	1,01	0,99	0,016824	-9,60E-05	-8,80E-05	-0,02	-0,02885486267	-0,1255308821	FALSE	FALSE
BigCC100_12364	115	0,12	1,01	1,04	0,016804	-2,48E-04	-2,76E-04	0,03	0,04222823539	0,1543281464	FALSE	FALSE
BigCC100_12365	124	0,12	0,99	1	0,016528	2,72E-04	1,20E-05	0,01	0,0144995697	-4,502500341	FALSE	FALSE
BigCC100_12368	171	0,11	1,01	0,99	0,016736	-1,96E-04	-4,40E-05	-0,02	-0,02885486267	-2,155278225	FALSE	FALSE
BigCC100_12371	57	0,11	1,01	1,01	0,016532	2,00E-05	8,40E-05	0	0	2,070389328	FALSE	FALSE
BigCC100_12375	31	0,12	0,98	1,03	0,016808	-4,40E-05	-2,92E-04	0,05	0,07179068307	2,73039294	FALSE	FALSE
BigCC100_12377	45	0,11	1,01	1	0,016768	-5,20E-05	-1,76E-04	-0,01	-0,01435529298	1,7589919	FALSE	FALSE
BigCC100_12387	112	0,14	0,98	1,01	0,016588	1,20E-05	-4,80E-05	0,03	0,04350163864	NA	FALSE	FALSE
BigCC100_12391	52	0,12	1	1	0,016808	8,00E-06	1,60E-05	0	0	1	FALSE	FALSE
BigCC100_12396	80	0,11	1,01	1	0,01674	7,20E-05	-1,88E-04	-0,01	-0,01435529298	NA	FALSE	FALSE
BigCC100_12399	40	0,11	1,01	1,03	0,01662	2,00E-04	2,08E-04	0,02	0,02828904443	0,05658352837	FALSE	FALSE
BigCC100_124	1257	1,32	1,83	2,85	0,0168	0,00366	8,00E-06	1,02	0,6391182708	-8,837627933	FALSE	FALSE
BigCC100_12403	67	0,11	1,01	1,02	0,016592	-5,60E-05	-4,40E-05	0,01	0,01421385922	-0,3479233034	FALSE	FALSE
BigCC100_12404	70	0,11	1,01	1,01	0,016584	9,20E-05	2,32E-04	0	0	1,334419039	FALSE	FALSE
BigCC100_12406	39	0,11	1,01	1,04	0,016836	-3,00E-04	-2,44E-04	0,03	0,04222823539	-0,2980813529	FALSE	FALSE
BigCC100_12408	58	0,11	1,01	1,02	0,01652	0	3,08E-04	0,01	0,01421385922	Inf	FALSE	FALSE
BigCC100_12409	87	0,11	1,01	1,03	0,016604	1,36E-04	1,32E-04	0,02	0,02828904443	-0,04306872189	FALSE	FALSE
BigCC100_12412	90	0,12	1,01	0,99	0,016596	1,60E-05	-7,20E-05	-0,02	-0,02885486267	NA	FALSE	FALSE
BigCC100_12415	122	0,12	1	1,03	0,0168	-2,64E-04	1,20E-05	0,03	0,04264433741	NA	FALSE	FALSE
BigCC100_12416	66	0,11	1,01	1,01	0,016804	-2,68E-04	-4,40E-05	0	0	-2,606657572	FALSE	FALSE
BigCC100_12425	39	0,12	1	1,02	0,01662	-8,40E-05	-7,60E-05	0,02	0,0285691522	-0,1443899093	FALSE	FALSE
BigCC100_12432	74	0,12	1	1,03	0,016584	2,04E-04	-4,40E-05	0,03	0,04264433741	NA	FALSE	FALSE
BigCC100_12433	105	0,12	1	1	0,016596	3,60E-05	-5,20E-05	0	0	NA	FALSE	FALSE
BigCC100_12435	34	0,11	1,02	0,99	0,0168	2,00E-05	-2,48E-04	-0,03	-0,04306872189	NA	FALSE	FALSE
BigCC100_12436	89	0,12	1,01	1,03	0,016832	-2,92E-04	-2,32E-04	0,02	0,02828904443	-0,3318435638	FALSE	FALSE
BigCC100_1244	96	0,11	1,01	1,01	0,016736	-2,04E-04	-1,88E-04	0	0	-0,1178364903	FALSE	FALSE
BigCC100_12440	47	0,11	1,01	1,02	0,016628	1,80E-04	-5,20E-05	0,01	0,01421385922	NA	FALSE	FALSE
BigCC100_12451	42	0,11	1,01	1	0,016828	-2,40E-05	-8,80E-05	-0,01	-0,01435529298	1,874469118	FALSE	FALSE
BigCC100_12462	87	0,12	1,01	1,01	0,016676	-2,00E-05	-6,80E-05	0	0	1,765534746	FALSE	FALSE
BigCC100_1249	115	0,12	1,01	1,03	0,01672	-2,00E-04	-1,36E-04	0,02	0,02828904443	-0,5563933485	FALSE	FALSE
BigCC100_125	1291	1,29	1,87	2,19	0,016712	0,004456	-2,40E-05	0,32	0,2278925997	NA	FALSE	FALSE
BigCC100_12506	37	0,12	1	1,02	0,016524	3,16E-04	6,80E-05	0,02	0,0285691522	-2,216317907	FALSE	FALSE
BigCC100_1251	80	0,12	1	1,03	0,016536	2,88E-04	1,52E-04	0,03	0,04264433741	-0,921997488	FALSE	FALSE
BigCC100_12519	44	0,11	1,01	1,01	0,016524	8,80E-05	1,60E-05	0	0	-2,459431619	FALSE	FALSE
BigCC100_12521	76	0,12	1	1,03	0,016644	1,80E-04	-1,60E-05	0,03	0,04264433741	NA	FALSE	FALSE
BigCC100_12527	33	0,11	1,01	1,01	0,016632	-8,80E-05	1,28E-04	0	0	NA	FALSE	FALSE
BigCC100_12531	82	0,12	1	0,99	0,016536	1,28E-04	8,00E-06	-0,01	-0,0144995697	-4	FALSE	FALSE
BigCC100_1254	41	0,12	1	1	0,016832	-2,48E-04	-2,36E-04	0	0	-0,07155326103	FALSE	FALSE
BigCC100_12560	41	0,11	1,01	1	0,016784	-4,40E-05	3,60E-05	-0,01	-0,01435529298	NA	FALSE	FALSE
BigCC100_12573	32	0,11	1,01	1,02	0,016524	1,20E-05	3,04E-04	0,01	0,01421385922	4,662965013	FALSE	FALSE
BigCC100_12578	94	0,12	1,01	1,05	0,016732	5,60E-05	-2,12E-04	0,04	0,05603403491	NA	FALSE	FALSE
BigCC100_1258	86	0,11	1,01	1,01	0,016792	2,80E-05	-8,00E-05	0	0	NA	FALSE	FALSE
BigCC100_12586	31	0,11	1,01	0,99	0,016808	2,40E-05	-2,52E-04	-0,02	-0,02885486267	NA	FALSE	FALSE
BigCC100_12588	38	0,11	1,01	1,03	0,016584	8,40E-05	-5,20E-05	0,02	0,02828904443	NA	FALSE	FALSE
BigCC100_126	2109	2,06	2,36	2,31	0,02108	0,020336	4,28E-04	-0,05	-0,03089400795	-5,570281329	FALSE	FALSE
BigCC100_1261	60	0,14	0,98	1	0,016636	8,00E-05	2,08E-04	0,02	0,02914634566	1,378511623	FALSE	FALSE
BigCC100_1263	143	0,11	1,01	1,03	0,016808	-7,20E-05	2,80E-05	0,02	0,02828904443	NA	FALSE	FALSE
BigCC100_1264	181	0,12	1,02	1	0,016724	-1,68E-04	9,60E-05	-0,02	-0,0285691522	NA	FALSE	FALSE
BigCC100_1265	111	0,11	1,01	1,04	0,016808	-1,72E-04	-2,08E-04	0,03	0,04222823539	0,2741749634	FALSE	FALSE
BigCC100_1269	52	0,11	1,01	1,01	0,016544	1,76E-04	3,12E-04	0	0	0,8259706002	FALSE	FALSE
BigCC100_12693	88	0,11	1,01	1,02	0,016532	-4,00E-06	6,00E-05	0,01	0,01421385922	NA	FALSE	FALSE
BigCC100_127	1681	1,59	2,06	2,26	0,01658	0,013408	3,04E-04	0,2	0,1336784352	-5,46287892	FALSE	FALSE
BigCC100_1270	106	0,12	1	1,03	0,016656	1,64E-04	-1,12E-04	0,03	0,04264433741	NA	FALSE	FALSE
BigCC100_12754	48	0,11	1,01	1,04	0,016496	3,20E-04	8,80E-05	0,03	0,04222823539	-1,862496476	FALSE	FALSE
BigCC100_1277	1325	0,57	1,35	1,07	0,01672	3,92E-04	-2,40E-05	-0,28	-0,3353486106	NA	FALSE	FALSE
BigCC100_1278	298	0,21	1,08	6,13	0,016596	2,20E-04	-1,60E-05	5,05	2,504855762	NA	FALSE	FALSE
BigCC100_12789	41	0,11	1,01	1,01	0,01682	-2,32E-04	-2,96E-04	0	0	0,3514723705	FALSE	FALSE
BigCC100_1279	1681	0,62	1,35	1,49	0,016628	0,00492	-9,60E-05	0,14	0,1423529234	NA	FALSE	FALSE
BigCC100_128	1803	2,97	1,46	5,53	0,029184	0,01514	4,04E-04	4,07	1,921311111	-5,227866102	FALSE	FALSE
BigCC100_1280	753	0,31	1,23	14,24	0,016712	8,80E-05	1,32E-04	13,01	3,533218926	0,5849625007	FALSE	FALSE
BigCC100_1281	591	0,36	1,18	11,19	0,016796	-6,00E-05	-2,08E-04	10,01	3,245351272	1,793549123	FALSE	FALSE
BigCC100_1282	1033	0,72	1,45	1,62	0,016816	-2,68E-04	-1,72E-04	0,17	0,1599409129	-0,6398244358	FALSE	FALSE
BigCC100_1283	318	0,22	1,08	1,02	0,016824	-1,52E-04	-2,28E-04	-0,06	-0,08246216019	0,5849625007	FALSE	FALSE
BigCC100_1284	305	0,22	1,09	1,16	0,016596	2,80E-05	1,68E-04	0,07	0,08979667035	2,584962501	FALSE	FALSE
BigCC100_1285	387	0,27	1,11	4,13	0,016528	2,96E-04	2,28E-04	3,02	1,895582105	-0,3765633515	FALSE	FALSE
BigCC100_12855	36	0,11	1,01	1,04	0,016524	2,72E-04	1,20E-05	0,03	0,04222823539	-4,502500341	FALSE	FALSE
BigCC100_1286	1079	0,82	1,49	1,08	0,016812	-2,76E-04	-8,00E-05	-0,41	-0,4642810183	-1,786596362	FALSE	FALSE
BigCC100_1287	721	0,59	1,35	52,54	0,016524	1,60E-05	-8,00E-06	51,19	5,282384888	NA	FALSE	FALSE
BigCC100_12874	40	0,13	0,99	0,99	0,016524	1,52E-04	1,44E-04	0	0	-0,078002512	FALSE	FALSE
BigCC100_12875	48	0,12	1	1,02	0,016824	-4,00E-05	-2,32E-04	0,02	0,0285691522	2,5360529	FALSE	FALSE
BigCC100_12876	44	0,11	1,01	1,01	0,0166	2,16E-04	-7,20E-05	0	0	NA	FALSE	FALSE
BigCC100_12877	60	0,12	1	1,03	0,016604	8,00E-06	4,00E-06	0,03	0,04264433741	-1	FALSE	FALSE
BigCC100_12878	46	0,12	1	1	0,016592	2,12E-04	1,60E-04	0	0	-0,4059923597	FALSE	FALSE
BigCC100_1288	699	0,31	1,14	5,22	0,016808	-2,68E-04	-2,84E-04	4,08	2,195015982	0,08365792905	FALSE	FALSE
BigCC100_12884	54	0,11	1,01	0,99	0,016548	3,60E-05	2,80E-04	-0,02	-0,02885486267	2,959358016	FALSE	FALSE
BigCC100_12888	35	0,11	1,01	1,03	0,016712	1,08E-04	-1,36E-04	0,02	0,02828904443	NA	FALSE	FALSE
BigCC100_1289	651	0,56	1,33	9,33	0,016604	-2,40E-05	5,20E-05	8	2,810450835	NA	FALSE	FALSE
BigCC100_12890	71	0,11	1,01	1,03	0,0168	-2,00E-04	2,80E-05	0,02	0,02828904443	NA	FALSE	FALSE
BigCC100_12895	118	0,12	1,02	1,01	0,016696	-1,56E-04	-8,40E-05	-0,01	-0,01421385922	-0,8930847961	FALSE	FALSE
BigCC100_12897	38	0,11	1,01	1,01	0,016624	1,96E-04	-5,60E-05	0	0	NA	FALSE	FALSE
BigCC100_12898	42	0,12	1	1,02	0,016804	-1,68E-04	-1,48E-04	0,02	0,0285691522	-0,1828640571	FALSE	FALSE
BigCC100_129	991	1,17	1,75	13,18	0,016664	8,00E-05	-8,00E-06	11,43	2,912923543	NA	FALSE	FALSE
BigCC100_1290	737	0,5	1,28	13,47	0,01662	1,20E-04	-1,60E-05	12,19	3,395534135	NA	FALSE	FALSE
BigCC100_12902	46	0,11	1,01	1,03	0,016716	6,80E-05	-1,60E-04	0,02	0,02828904443	NA	FALSE	FALSE
BigCC100_12906	41	0,11	1,01	1	0,016528	2,84E-04	7,60E-05	-0,01	-0,01435529298	-1,901819606	FALSE	FALSE
BigCC100_1291	778	0,31	1,26	8,26	0,016584	2,20E-04	0	7	2,712718048	-Inf	FALSE	FALSE
BigCC100_12913	42	0,12	1	1	0,016832	-2,44E-04	-1,60E-05	0	0	-3,930737338	FALSE	FALSE
BigCC100_12918	38	0,11	1,01	1,03	0,016804	1,20E-05	-1,92E-04	0,02	0,02828904443	NA	FALSE	FALSE
BigCC100_1292	622	0,35	1,17	1,03	0,016812	-1,88E-04	-2,88E-04	-0,14	-0,1838641924	0,6153361498	FALSE	FALSE
BigCC100_1293	338	0,18	1,05	2,05	0,016812	-2,72E-04	-1,12E-04	1	0,9652345818	-1,280107919	FALSE	FALSE
BigCC100_12933	56	0,12	1	1,01	0,016812	-2,20E-04	-1,24E-04	0,01	0,01435529298	-0,8271634031	FALSE	FALSE
BigCC100_1294	201	0,15	1,04	1,01	0,016548	5,20E-05	-2,80E-05	-0,03	-0,04222823539	NA	FALSE	FALSE
BigCC100_12943	31	0,12	1	1,02	0,016708	-1,80E-04	4,40E-05	0,02	0,0285691522	NA	FALSE	FALSE
BigCC100_1295	161	0,12	1,01	0,99	0,016792	-2,52E-04	-2,44E-04	-0,02	-0,02885486267	-0,04654258594	FALSE	FALSE
BigCC100_12957	43	0,12	1	1,02	0,016524	6,80E-05	6,40E-05	0,02	0,0285691522	-0,08746284125	FALSE	FALSE
BigCC100_1296	452	0,35	1,18	1,26	0,016744	-2,40E-05	-2,08E-04	0,08	0,09463687414	3,115477217	FALSE	FALSE
BigCC100_12960	63	0,12	1	0,99	0,01654	3,60E-05	7,20E-05	-0,01	-0,0144995697	1	FALSE	FALSE
BigCC100_12966	91	0,12	1	1	0,016788	-1,60E-04	-1,84E-04	0	0	0,2016338612	FALSE	FALSE
BigCC100_12967	44	0,11	1,01	1,03	0,016532	1,24E-04	2,04E-04	0,02	0,02828904443	0,7182290316	FALSE	FALSE
BigCC100_1297	559	0,41	1,24	10,06	0,016668	-8,40E-05	8,80E-05	8,82	3,020218279	NA	FALSE	FALSE
BigCC100_12978	98	0,12	1,01	1,05	0,016732	8,00E-05	-2,08E-04	0,04	0,05603403491	NA	FALSE	FALSE
BigCC100_1298	800	0,57	1,35	29,34	0,016716	-1,92E-04	-1,04E-04	27,99	4,441837559	-0,8845227826	FALSE	FALSE
BigCC100_12984	116	0,13	0,99	1,01	0,016748	6,80E-05	8,40E-05	0,02	0,02885486267	0,3048545815	FALSE	FALSE
BigCC100_1299	121	0,12	1,02	1,01	0,01682	-3,04E-04	-1,68E-04	-0,01	-0,01421385922	-0,8556100907	FALSE	FALSE
BigCC100_13	1791	4,09	4,84	139,92	0,0333	0,015388	3,40E-04	135,08	4,853451337	-5,500127178	FALSE	FALSE
BigCC100_130	2863	3,97	4,65	10,46	0,03524	0,035056	7,84E-04	5,81	1,16958023	-5,482663925	FALSE	FALSE
BigCC100_1300	724	0,85	1,31	3,94	0,016632	1,00E-04	-1,08E-04	2,63	1,588628818	NA	FALSE	FALSE
BigCC100_13002	71	0,12	1,02	1,03	0,016672	-1,00E-04	-7,20E-05	0,01	0,01407518521	-0,4739311883	FALSE	FALSE
BigCC100_13004	44	0,13	1	0,99	0,016844	0	-3,60E-05	-0,01	-0,0144995697	NA	FALSE	FALSE
BigCC100_13006	32	0,13	1	1	0,016552	2,88E-04	-2,00E-05	0	0	NA	FALSE	FALSE
BigCC100_13007	36	0,13	0,99	0,98	0,01682	-1,24E-04	-2,36E-04	-0,01	-0,01464677596	0,928446739	FALSE	FALSE
BigCC100_1301	94	0,12	1,04	1,04	0,01676	-1,80E-04	-1,20E-05	0	0	-3,906890596	FALSE	FALSE
BigCC100_13013	102	0,14	0,99	0,98	0,016848	-2,40E-05	-3,24E-04	-0,01	-0,01464677596	3,754887502	FALSE	FALSE
BigCC100_13017	34	0,12	1	1	0,016656	1,60E-04	-1,16E-04	0	0	NA	FALSE	FALSE
BigCC100_1302	101	0,14	1	0,97	0,016584	1,52E-04	2,48E-04	-0,03	-0,04394334759	0,7062687969	FALSE	FALSE
BigCC100_13027	110	0,13	1,03	1,02	0,0166	2,12E-04	-3,60E-05	-0,01	-0,01407518521	NA	FALSE	FALSE
BigCC100_1303	392	0,2	1,06	1,01	0,01652	1,80E-04	1,32E-04	-0,05	-0,06970897181	-0,447458977	FALSE	FALSE
BigCC100_13031	69	0,12	1,01	1,02	0,01682	-2,36E-04	1,20E-05	0,01	0,01421385922	NA	FALSE	FALSE
BigCC100_13037	40	0,11	1,01	1,01	0,016712	1,08E-04	3,20E-05	0	0	-1,754887502	FALSE	FALSE
BigCC100_1304	385	0,25	1,06	3,99	0,016844	-2,60E-04	-2,00E-05	2,93	1,912324482	-3,700439718	FALSE	FALSE
BigCC100_13040	34	0,14	1	1	0,016532	2,76E-04	6,80E-05	0	0	-2,021061616	FALSE	FALSE
BigCC100_1305	182	0,16	1,02	1,02	0,016832	-2,96E-04	-2,40E-04	0	0	-0,30256277	FALSE	FALSE
BigCC100_13050	64	0,14	0,98	1,03	0,016828	-2,28E-04	-8,00E-06	0,05	0,07179068307	-4,832890014	FALSE	FALSE
BigCC100_13051	43	0,12	1,01	1,05	0,016824	-8,00E-06	-2,12E-04	0,04	0,05603403491	4,727920455	FALSE	FALSE
BigCC100_13055	48	0,13	0,99	1,01	0,016652	3,60E-05	-1,00E-04	0,02	0,02885486267	NA	FALSE	FALSE
BigCC100_1306	337	0,21	1,1	3,13	0,01676	-1,64E-04	-2,20E-04	2,03	1,508659133	0,4238077089	FALSE	FALSE
BigCC100_1307	807	0,25	1,11	4,14	0,0167	-3,60E-05	-1,56E-04	3,03	1,899071091	2,115477217	FALSE	FALSE
BigCC100_13075	34	0,13	1	0,99	0,016748	-1,96E-04	-1,20E-05	-0,01	-0,0144995697	-4,029747343	FALSE	FALSE
BigCC100_1308	329	0,25	1,09	4,16	0,016824	-3,12E-04	-2,76E-04	3,07	1,932255393	-0,1768777621	FALSE	FALSE
BigCC100_13080	43	0,13	1,02	1,01	0,016516	1,00E-04	2,16E-04	-0,01	-0,01421385922	1,111031312	FALSE	FALSE
BigCC100_13083	42	0,13	1,01	1,01	0,016748	9,20E-05	6,40E-05	0	0	-0,5235619561	FALSE	FALSE
BigCC100_13084	44	0,13	1,01	1	0,016748	-1,48E-04	-1,04E-04	-0,01	-0,01435529298	-0,5090136475	FALSE	FALSE
BigCC100_13086	56	0,13	1	1,01	0,016548	3,12E-04	-8,00E-06	0,01	0,01435529298	NA	FALSE	FALSE
BigCC100_1309	157	0,14	1,03	1,04	0,016816	-2,92E-04	-2,16E-04	0,01	0,01393919096	-0,4349370567	FALSE	FALSE
BigCC100_13091	45	0,13	1	0,99	0,0167	1,28E-04	1,00E-04	-0,01	-0,0144995697	-0,3561438102	FALSE	FALSE
BigCC100_13098	123	0,14	0,99	1,02	0,016512	2,48E-04	7,20E-05	0,03	0,04306872189	-1,784271309	FALSE	FALSE
BigCC100_13099	60	0,13	1	1	0,016556	2,80E-05	2,56E-04	0	0	3,192645078	FALSE	FALSE
BigCC100_131	942	0,49	1,32	25,53	0,01684	-2,20E-04	-2,52E-04	24,21	4,273583703	0,19592021	FALSE	FALSE
BigCC100_1310	245	0,16	1,06	1,08	0,016516	2,68E-04	1,20E-05	0,02	0,0269670476	-4,48112669	FALSE	FALSE
BigCC100_13101	34	0,12	1	1	0,01664	-8,80E-05	-8,80E-05	0	0	0	FALSE	FALSE
BigCC100_13103	31	0,14	1,01	0,98	0,016616	-7,60E-05	-2,80E-05	-0,03	-0,04350163864	-1,440572591	FALSE	FALSE
BigCC100_13105	36	0,13	1	1,01	0,016828	4,00E-06	-2,88E-04	0,01	0,01435529298	NA	FALSE	FALSE
BigCC100_13106	37	0,13	0,99	1,02	0,016752	8,80E-05	9,60E-05	0,03	0,04306872189	0,1255308821	FALSE	FALSE
BigCC100_13107	63	0,13	1,01	0,99	0,01682	-2,48E-04	0	-0,02	-0,02885486267	-Inf	FALSE	FALSE
BigCC100_1311	184	0,16	1,04	1,02	0,016584	-4,00E-05	-2,80E-05	-0,02	-0,02801437617	-0,5145731728	FALSE	FALSE
BigCC100_13115	33	0,13	1,01	0,99	0,016824	-2,16E-04	-8,00E-06	-0,02	-0,02885486267	-4,754887502	FALSE	FALSE
BigCC100_1312	439	0,21	1,05	1,07	0,016584	-4,40E-05	2,32E-04	0,02	0,02722146874	NA	FALSE	FALSE
BigCC100_1313	182	0,15	1,05	1,07	0,0167	4,40E-05	-4,00E-05	0,02	0,02722146874	NA	FALSE	FALSE
BigCC100_1314	74	0,13	1,01	1	0,016552	1,88E-04	-1,60E-05	-0,01	-0,01435529298	NA	FALSE	FALSE
BigCC100_1315	91	0,12	1,02	1,01	0,016564	1,60E-05	2,80E-04	-0,01	-0,01421385922	4,129283017	FALSE	FALSE
BigCC100_1316	618	0,5	1,31	19,28	0,01658	1,52E-04	4,00E-05	17,97	3,879466335	-1,925999419	FALSE	FALSE
BigCC100_13163	80	0,13	1	1,02	0,016844	4,00E-06	0	0,02	0,0285691522	-Inf	FALSE	FALSE
BigCC100_13165	39	0,12	1	1	0,016504	3,36E-04	4,00E-05	0	0	-3,070389328	FALSE	FALSE
BigCC100_13167	37	0,13	1	1	0,016804	-2,12E-04	-2,16E-04	0	0	0,0269670476	FALSE	FALSE
BigCC100_1317	179	0,16	1,04	1,06	0,0167	1,28E-04	1,32E-04	0,02	0,02748073642	0,04439411936	FALSE	FALSE
BigCC100_13179	61	0,12	1	1	0,01652	3,04E-04	3,04E-04	0	0	0	FALSE	FALSE
BigCC100_1318	647	0,54	1,36	5,31	0,01682	-2,32E-04	-8,00E-06	3,95	1,96510521	-4,857980995	FALSE	FALSE
BigCC100_1319	673	0,52	1,26	18,25	0,016692	4,80E-05	-9,20E-05	16,99	3,856400825	NA	FALSE	FALSE
BigCC100_132	932	0,77	1,47	113,77	0,016704	-3,60E-05	-1,92E-04	112,3	6,274160218	2,415037499	FALSE	FALSE
BigCC100_1320	390	0,23	1,07	2,08	0,016524	2,00E-04	1,32E-04	1,01	0,9589727317	-0,5994620704	FALSE	FALSE
BigCC100_13206	36	0,11	1	1,02	0,016524	1,12E-04	3,20E-05	0,02	0,0285691522	-1,807354922	FALSE	FALSE
BigCC100_13209	65	0,12	1,02	1	0,016828	-2,00E-04	-2,96E-04	-0,02	-0,0285691522	0,5655971759	FALSE	FALSE
BigCC100_1321	156	0,13	1,01	1	0,016816	-1,28E-04	8,00E-06	-0,01	-0,01435529298	NA	FALSE	FALSE
BigCC100_13210	39	0,13	0,99	0,99	0,016836	0	-2,00E-05	0	0	NA	FALSE	FALSE
BigCC100_13214	46	0,12	1	1	0,016808	-1,44E-04	-2,80E-04	0	0	0,9593580155	FALSE	FALSE
BigCC100_13217	40	0,11	1,01	1,01	0,016656	1,84E-04	1,56E-04	0	0	-0,2381597372	FALSE	FALSE
BigCC100_1322	819	0,25	1,08	3,13	0,016556	1,40E-04	-1,20E-05	2,05	1,535131345	NA	FALSE	FALSE
BigCC100_13221	51	0,14	0,98	0,98	0,01652	2,84E-04	8,80E-05	0	0	-1,690315501	FALSE	FALSE
BigCC100_13222	46	0,12	1,01	1	0,016824	-1,36E-04	-2,80E-04	-0,01	-0,01435529298	1,041820176	FALSE	FALSE
BigCC100_13225	31	0,13	1,01	0,99	0,016608	1,48E-04	2,16E-04	-0,02	-0,02885486267	0,5454341365	FALSE	FALSE
BigCC100_1323	2140	1,19	1,7	2,7	0,016824	0,015968	-1,60E-05	1	0,6674246609	NA	FALSE	FALSE
BigCC100_13231	65	0,14	1	0,98	0,016548	3,08E-04	2,76E-04	-0,02	-0,02914634566	-0,1582620839	FALSE	FALSE
BigCC100_1324	91	0,14	0,99	1	0,01658	8,00E-05	8,40E-05	0,01	0,0144995697	0,07038932789	FALSE	FALSE
BigCC100_13240	42	0,13	0,99	1	0,01684	-1,48E-04	-2,80E-05	0,01	0,0144995697	-2,402098444	FALSE	FALSE
BigCC100_13242	45	0,12	1,02	1	0,01682	-2,64E-04	4,00E-06	-0,02	-0,0285691522	NA	FALSE	FALSE
BigCC100_1325	186	0,15	1,01	1,02	0,016828	-8,40E-05	-4,80E-05	0,01	0,01421385922	-0,8073549221	FALSE	FALSE
BigCC100_1326	342	0,25	1,12	1,1	0,016604	2,40E-04	-9,20E-05	-0,02	-0,02599520853	NA	FALSE	FALSE
BigCC100_1327	179	0,16	1	0,99	0,016584	2,44E-04	-4,00E-05	-0,01	-0,0144995697	NA	FALSE	FALSE
BigCC100_1328	826	0,76	1,44	18,42	0,016836	-4,80E-05	-1,04E-04	16,98	3,677132345	1,115477217	FALSE	FALSE
BigCC100_1329	284	0,21	1,08	1,12	0,016692	-1,64E-04	-1,52E-04	0,04	0,05246741989	-0,1096244912	FALSE	FALSE
BigCC100_133	2068	2,58	2,71	8,76	0,02606	0,019248	3,80E-04	6,05	1,692638018	-5,662565319	FALSE	FALSE
BigCC100_1330	461	0,16	1,01	1,02	0,016592	1,40E-04	-7,20E-05	0,01	0,01421385922	NA	FALSE	FALSE
BigCC100_1331	181	0,15	1,06	1,07	0,01676	7,60E-05	-2,48E-04	0,01	0,01354653184	NA	FALSE	FALSE
BigCC100_13310	44	0,14	0,99	0,98	0,016556	4,80E-05	-2,40E-05	-0,01	-0,01464677596	NA	FALSE	FALSE
BigCC100_1332	839	0,22	1,07	4,07	0,016732	-1,20E-04	-1,80E-04	3	1,927417998	0,5849625007	FALSE	FALSE
BigCC100_1333	228	0,17	1,04	1,02	0,016516	3,04E-04	3,00E-04	-0,02	-0,02801437617	-0,01910882295	FALSE	FALSE
BigCC100_1334	177	0,16	1,02	1,04	0,016568	2,80E-04	4,80E-05	0,02	0,02801437617	-2,544320516	FALSE	FALSE
BigCC100_1335	413	0,2	1,07	2,05	0,016584	2,00E-05	8,80E-05	0,98	0,9380131131	2,137503524	FALSE	FALSE
BigCC100_1336	306	0,16	1,05	1,03	0,016552	2,12E-04	2,56E-04	-0,02	-0,02774499048	0,2720795454	FALSE	FALSE
BigCC100_1337	1138	0,62	1,32	1,31	0,016616	2,32E-04	2,00E-04	-0,01	-0,01097111782	-0,2141248054	FALSE	FALSE
BigCC100_13374	67	0,11	1,01	1,04	0,016824	-8,40E-05	1,20E-05	0,03	0,04222823539	NA	FALSE	FALSE
BigCC100_1338	181	0,14	1,04	1,04	0,016812	0	-2,64E-04	0	0	NA	FALSE	FALSE
BigCC100_13382	60	0,13	0,99	0,99	0,01656	2,76E-04	2,52E-04	0	0	-0,1312445333	FALSE	FALSE
BigCC100_13387	46	0,13	1	0,99	0,01654	2,92E-04	8,00E-05	-0,01	-0,0144995697	-1,867896464	FALSE	FALSE
BigCC100_1339	112	0,14	1,01	1,03	0,016556	1,64E-04	2,72E-04	0,02	0,02828904443	0,7299108366	FALSE	FALSE
BigCC100_13392	154	0,13	1,03	1,02	0,01684	-3,24E-04	-8,00E-05	-0,01	-0,01407518521	-2,017921908	FALSE	FALSE
BigCC100_13394	88	0,13	1	1,02	0,016728	-3,60E-05	4,40E-05	0,02	0,0285691522	NA	FALSE	FALSE
BigCC100_13398	78	0,13	1,01	1	0,016712	1,20E-04	-1,76E-04	-0,01	-0,01435529298	NA	FALSE	FALSE
BigCC100_134	3080	5,09	6,4	10,38	0,043824	0,040068	5,32E-04	3,98	0,6976626335	-6,234880443	FALSE	FALSE
BigCC100_1340	605	0,52	1,26	13,43	0,016516	2,24E-04	9,20E-05	12,17	3,413963666	-1,283792966	FALSE	FALSE
BigCC100_13402	34	0,12	1,02	1	0,01682	4,00E-06	2,40E-05	-0,02	-0,0285691522	2,584962501	FALSE	FALSE
BigCC100_13404	100	0,14	0,99	1,01	0,016836	-3,16E-04	-2,32E-04	0,02	0,02885486267	-0,445799753	FALSE	FALSE
BigCC100_13405	36	0,13	1	1,01	0,016516	3,40E-04	1,72E-04	0,01	0,01435529298	-0,9831261814	FALSE	FALSE
BigCC100_13406	82	0,16	0,98	0,97	0,016756	-1,60E-04	-1,24E-04	-0,01	-0,01479700193	-0,3677317845	FALSE	FALSE
BigCC100_13407	46	0,12	1,02	1	0,016556	5,20E-05	2,00E-04	-0,02	-0,0285691522	1,943416472	FALSE	FALSE
BigCC100_13408	40	0,13	0,99	0,99	0,016628	1,92E-04	-1,20E-04	0	0	NA	FALSE	FALSE
BigCC100_1341	730	0,51	1,28	34,45	0,016832	0	-1,60E-05	33,17	4,750288268	NA	FALSE	FALSE
BigCC100_13410	63	0,14	1	0,98	0,016832	-2,96E-04	-3,04E-04	-0,02	-0,02914634566	0,03847414781	FALSE	FALSE
BigCC100_13411	57	0,11	1,03	1,01	0,01658	2,48E-04	1,28E-04	-0,02	-0,02828904443	-0,9541963104	FALSE	FALSE
BigCC100_13415	90	0,13	1	1,02	0,016752	-2,12E-04	8,00E-05	0,02	0,0285691522	NA	FALSE	FALSE
BigCC100_13419	83	0,14	1,01	0,99	0,01682	3,60E-05	1,20E-05	-0,02	-0,02885486267	-1,584962501	FALSE	FALSE
BigCC100_1342	837	0,41	1,16	8,15	0,016688	-9,20E-05	-1,64E-04	6,99	2,812675254	0,8339900486	FALSE	FALSE
BigCC100_1343	49	0,13	1	0,99	0,016592	1,36E-04	2,20E-04	-0,01	-0,0144995697	0,6938968723	FALSE	FALSE
BigCC100_13431	45	0,13	0,99	1,01	0,01656	1,20E-04	1,04E-04	0,02	0,02885486267	-0,2064508775	FALSE	FALSE
BigCC100_13433	85	0,12	1,02	1,01	0,016608	3,60E-05	-2,00E-05	-0,01	-0,01421385922	NA	FALSE	FALSE
BigCC100_1344	48	0,13	1,02	1	0,016616	1,24E-04	-6,40E-05	-0,02	-0,0285691522	NA	FALSE	FALSE
BigCC100_13440	56	0,12	1,01	1,02	0,016584	2,32E-04	4,40E-05	0,01	0,01421385922	-2,398549376	FALSE	FALSE
BigCC100_13441	32	0,11	1,02	1,03	0,016832	-8,00E-05	-2,48E-04	0,01	0,01407518521	1,632268215	FALSE	FALSE
BigCC100_13445	31	0,13	1	0,99	0,016812	-2,64E-04	-6,40E-05	-0,01	-0,0144995697	-2,044394119	FALSE	FALSE
BigCC100_13448	55	0,12	1,02	1,02	0,016608	1,92E-04	2,28E-04	0	0	0,2479275134	FALSE	FALSE
BigCC100_1345	337	0,23	1,08	7,06	0,016844	-1,96E-04	-8,00E-06	5,98	2,708636871	-4,614709844	FALSE	FALSE
BigCC100_1346	79	0,12	1,01	1	0,016744	-1,28E-04	-1,56E-04	-0,01	-0,01435529298	0,2854022189	FALSE	FALSE
BigCC100_13461	51	0,13	1,01	1,01	0,01676	-2,80E-05	4,80E-05	0	0	NA	FALSE	FALSE
BigCC100_1347	118	0,14	1	1,01	0,01652	7,60E-05	1,20E-05	0,01	0,01435529298	-2,662965013	FALSE	FALSE
BigCC100_13473	43	0,13	0,99	0,99	0,016736	1,04E-04	-1,96E-04	0	0	NA	FALSE	FALSE
BigCC100_1348	108	0,14	1	0,99	0,016532	1,16E-04	1,72E-04	-0,01	-0,0144995697	0,5682837596	FALSE	FALSE
BigCC100_13480	48	0,12	1,02	1	0,01682	-2,32E-04	-3,20E-04	-0,02	-0,0285691522	0,4639470998	FALSE	FALSE
BigCC100_1349	244	0,15	0,99	1,02	0,016672	-1,40E-04	-4,00E-06	0,03	0,04306872189	-5,129283017	FALSE	FALSE
BigCC100_13494	40	0,11	1,01	1,04	0,01652	3,04E-04	2,40E-05	0,03	0,04222823539	-3,662965013	FALSE	FALSE
BigCC100_13496	204	0,13	1,01	0,99	0,01684	-1,32E-04	-3,00E-04	-0,02	-0,02885486267	1,184424571	FALSE	FALSE
BigCC100_135	1713	3,76	4,61	27,96	0,03194	0,012412	3,44E-04	23,35	2,600525705	-5,173183227	FALSE	FALSE
BigCC100_1350	455	0,19	1,04	3,04	0,016756	3,20E-05	4,40E-05	2	1,547487795	0,4594316186	FALSE	FALSE
BigCC100_1351	265	0,19	1,03	2,04	0,016592	2,24E-04	2,80E-05	1,01	0,9859248148	-3	FALSE	FALSE
BigCC100_13515	56	0,14	0,99	0,98	0,016544	0	1,12E-04	-0,01	-0,01464677596	Inf	FALSE	FALSE
BigCC100_13516	108	0,12	1,01	1,01	0,016572	1,12E-04	4,40E-05	0	0	-1,347923303	FALSE	FALSE
BigCC100_1352	345	0,25	1,1	5,17	0,01658	1,76E-04	-4,40E-05	4,07	2,232660757	NA	FALSE	FALSE
BigCC100_13525	39	0,11	1,02	1,01	0,016704	-1,56E-04	-1,64E-04	-0,01	-0,01421385922	0,07214978576	FALSE	FALSE
BigCC100_1353	82	0,12	1,03	1,03	0,016704	3,60E-05	1,28E-04	0	0	1,830074999	FALSE	FALSE
BigCC100_13532	33	0,12	1	1	0,016744	-4,00E-06	-1,48E-04	0	0	5,209453366	FALSE	FALSE
BigCC100_1354	102	0,13	1,02	1	0,016732	-4,00E-05	-2,24E-04	-0,02	-0,0285691522	2,485426827	FALSE	FALSE
BigCC100_13543	55	0,12	1,01	1,03	0,01656	3,20E-05	2,00E-04	0,02	0,02828904443	2,64385619	FALSE	FALSE
BigCC100_1355	389	0,17	1,03	1,02	0,016812	-2,56E-04	-2,76E-04	-0,01	-0,01407518521	0,1085244568	FALSE	FALSE
BigCC100_1356	482	0,22	1,06	3,04	0,016524	8,00E-05	4,80E-05	1,98	1,520007059	-0,7369655942	FALSE	FALSE
BigCC100_13566	44	0,12	1,02	1	0,01684	-2,28E-04	-1,08E-04	-0,02	-0,0285691522	-1,078002512	FALSE	FALSE
BigCC100_13567	42	0,12	1,02	1,02	0,016568	2,60E-04	2,44E-04	0	0	-0,09163047547	FALSE	FALSE
BigCC100_1357	118	0,13	1,01	1,01	0,016752	-9,60E-05	-1,64E-04	0	0	0,7725895039	FALSE	FALSE
BigCC100_1358	47	0,12	1,02	1,01	0,016592	-7,60E-05	-8,00E-05	-0,01	-0,01421385922	0,07400058144	FALSE	FALSE
BigCC100_1359	220	0,16	1,02	1,04	0,016752	8,40E-05	4,00E-06	0,02	0,02801437617	-4,392317423	FALSE	FALSE
BigCC100_136	1234	1,71	2,13	5,16	0,019572	0,008332	3,04E-04	3,03	1,276517635	-4,776519611	FALSE	FALSE
BigCC100_1360	48	0,12	1,02	1	0,016812	-2,60E-04	2,40E-05	-0,02	-0,0285691522	NA	FALSE	FALSE
BigCC100_13603	33	0,13	0,99	0,99	0,01672	-5,60E-05	1,16E-04	0	0	NA	FALSE	FALSE
BigCC100_1361	50	0,14	0,99	0,99	0,016732	-2,40E-05	-2,12E-04	0	0	3,142957954	FALSE	FALSE
BigCC100_13617	161	0,14	1,02	1,02	0,016752	-2,16E-04	-2,28E-04	0	0	0,078002512	FALSE	FALSE
BigCC100_1362	71	0,12	1	1	0,0166	1,20E-05	2,48E-04	0	0	4,36923381	FALSE	FALSE
BigCC100_13623	56	0,12	1,02	1	0,016524	3,16E-04	1,60E-05	-0,02	-0,0285691522	-4,303780748	FALSE	FALSE
BigCC100_13624	34	0,12	1,01	1,02	0,016844	-2,56E-04	-1,88E-04	0,01	0,01421385922	-0,4454111483	FALSE	FALSE
BigCC100_13626	34	0,11	1,01	1,03	0,016836	-2,20E-04	-1,48E-04	0,02	0,02828904443	-0,5719063479	FALSE	FALSE
BigCC100_13627	36	0,13	1	0,99	0,016856	-3,20E-04	-2,44E-04	-0,01	-0,0144995697	-0,3911907573	FALSE	FALSE
BigCC100_13628	31	0,12	1	1	0,016664	-1,04E-04	1,80E-04	0	0	NA	FALSE	FALSE
BigCC100_13629	32	0,13	0,99	0,99	0,016528	9,20E-05	8,00E-06	0	0	-3,523561956	FALSE	FALSE
BigCC100_1363	331	0,17	1,06	1,1	0,016732	8,40E-05	8,80E-05	0,04	0,05343925896	0,06711419586	FALSE	FALSE
BigCC100_13634	34	0,13	0,99	1,01	0,016592	1,04E-04	1,52E-04	0,02	0,02885486267	0,5474877953	FALSE	FALSE
BigCC100_13636	50	0,13	1	0,99	0,01682	-1,88E-04	-1,24E-04	-0,01	-0,0144995697	-0,6003925413	FALSE	FALSE
BigCC100_13637	32	0,14	0,98	0,98	0,01648	2,84E-04	2,68E-04	0	0	-0,08365792905	FALSE	FALSE
BigCC100_13639	61	0,12	1	1,03	0,016756	-2,80E-05	-1,04E-04	0,03	0,04264433741	1,893084796	FALSE	FALSE
BigCC100_1364	138	0,15	1	1	0,016756	-1,32E-04	-1,68E-04	0	0	0,3479233034	FALSE	FALSE
BigCC100_13643	33	0,13	1	0,99	0,01682	-2,60E-04	-1,44E-04	-0,01	-0,0144995697	-0,8524428116	FALSE	FALSE
BigCC100_1365	264	0,16	1,02	1,01	0,016828	-2,92E-04	1,60E-05	-0,01	-0,01421385922	NA	FALSE	FALSE
BigCC100_1366	132	0,15	1	1,01	0,016528	-8,00E-06	2,68E-04	0,01	0,01435529298	NA	FALSE	FALSE
BigCC100_13664	40	0,14	0,99	1	0,016648	2,00E-05	-6,00E-05	0,01	0,0144995697	NA	FALSE	FALSE
BigCC100_1367	231	0,16	1,02	1,02	0,016704	3,20E-05	1,16E-04	0	0	1,857980995	FALSE	FALSE
BigCC100_13673	46	0,12	1,01	1	0,016524	3,60E-05	3,00E-04	-0,01	-0,01435529298	3,058893689	FALSE	FALSE
BigCC100_1368	299	0,18	1,02	2,01	0,01676	-3,20E-05	-2,24E-04	0,99	0,9786263492	2,807354922	FALSE	FALSE
BigCC100_1369	50	0,13	1,01	0,99	0,01662	2,04E-04	2,08E-04	-0,02	-0,02885486267	0,02801437617	FALSE	FALSE
BigCC100_137	1513	2,85	2,9	14,82	0,027312	0,01154	3,12E-04	11,92	2,353420642	-5,208953385	FALSE	FALSE
BigCC100_1370	900	0,52	1,32	9,29	0,016588	4,00E-06	3,20E-05	7,97	2,815140667	3	FALSE	FALSE
BigCC100_13704	50	0,14	1	0,98	0,016564	5,20E-05	1,32E-04	-0,02	-0,02914634566	1,343954401	FALSE	FALSE
BigCC100_1371	105	0,14	1	1	0,016612	2,20E-04	-8,80E-05	0	0	NA	FALSE	FALSE
BigCC100_1372	141	0,14	1,04	1,02	0,016556	2,72E-04	-2,40E-05	-0,02	-0,02801437617	NA	FALSE	FALSE
BigCC100_1373	56	0,13	1,02	0,99	0,016596	5,20E-05	4,00E-05	-0,03	-0,04306872189	-0,3785116233	FALSE	FALSE
BigCC100_13737	53	0,13	1	1,02	0,016748	-7,20E-05	4,00E-06	0,02	0,0285691522	NA	FALSE	FALSE
BigCC100_1376	41	0,12	1	1	0,016536	2,92E-04	1,24E-04	0	0	-1,235628248	FALSE	FALSE
BigCC100_13791	47	0,13	1,01	1	0,016544	1,56E-04	3,60E-05	-0,01	-0,01435529298	-2,115477217	FALSE	FALSE
BigCC100_138	1264	1,73	2,08	65,1	0,019492	0,008636	0,002272	63,02	4,96800211	-1,926400409	FALSE	FALSE
BigCC100_13838	112	0,13	1,01	1,01	0,016652	1,80E-04	-1,40E-04	0	0	NA	FALSE	FALSE
BigCC100_1384	215	0,13	1,01	1,04	0,016516	2,20E-04	2,40E-04	0,03	0,04222823539	0,1255308821	FALSE	FALSE
BigCC100_13863	38	0,12	1	1	0,016596	1,44E-04	1,56E-04	0	0	0,1154772174	FALSE	FALSE
BigCC100_13867	57	0,12	1,01	1	0,0167	-2,40E-05	-1,24E-04	-0,01	-0,01435529298	2,36923381	FALSE	FALSE
BigCC100_1387	187	0,12	1,02	1,04	0,016584	-3,60E-05	2,80E-05	0,02	0,02801437617	NA	FALSE	FALSE
BigCC100_13870	84	0,14	1	0,98	0,016808	1,20E-05	-2,08E-04	-0,02	-0,02914634566	NA	FALSE	FALSE
BigCC100_13873	48	0,13	1,01	0,99	0,016684	-2,00E-05	1,48E-04	-0,02	-0,02885486267	NA	FALSE	FALSE
BigCC100_13874	40	0,12	1,02	1	0,01682	-2,92E-04	-8,00E-06	-0,02	-0,0285691522	-5,189824559	FALSE	FALSE
BigCC100_1388	41	0,13	1,01	1,01	0,016584	1,20E-05	2,60E-04	0	0	4,437405312	FALSE	FALSE
BigCC100_139	465	0,32	1,16	10,14	0,016568	2,48E-04	2,64E-04	8,98	3,127860942	0,09019780897	FALSE	FALSE
BigCC100_1390	59	0,12	1,02	1	0,016724	1,24E-04	-9,20E-05	-0,02	-0,0285691522	NA	FALSE	FALSE
BigCC100_13907	36	0,12	1	1,03	0,01654	-4,00E-06	2,20E-04	0,03	0,04264433741	NA	FALSE	FALSE
BigCC100_13908	89	0,13	0,99	0,99	0,016856	-4,40E-05	-4,00E-05	0	0	-0,1375035237	FALSE	FALSE
BigCC100_13909	31	0,11	1,01	1,02	0,016588	1,60E-04	-5,20E-05	0,01	0,01421385922	NA	FALSE	FALSE
BigCC100_1391	120	0,13	1,01	1,01	0,016832	-2,40E-04	-2,92E-04	0	0	0,2829339633	FALSE	FALSE
BigCC100_13916	63	0,13	1	1,02	0,016528	2,76E-04	3,20E-04	0,02	0,0285691522	0,2134036381	FALSE	FALSE
BigCC100_13917	32	0,13	0,99	0,99	0,016752	-1,44E-04	7,60E-05	0	0	NA	FALSE	FALSE
BigCC100_13923	63	0,12	1	1	0,016828	-2,00E-04	-2,44E-04	0	0	0,2868811478	FALSE	FALSE
BigCC100_13929	42	0,14	0,99	0,98	0,016516	3,08E-04	2,48E-04	-0,01	-0,01464677596	-0,3125902303	FALSE	FALSE
BigCC100_1393	50	0,13	1	1	0,01684	-2,96E-04	4,00E-06	0	0	NA	FALSE	FALSE
BigCC100_1395	153	0,14	1,01	1,01	0,016824	-2,40E-05	-8,80E-05	0	0	1,874469118	FALSE	FALSE
BigCC100_13963	43	0,11	1,03	1,04	0,016664	-1,24E-04	8,40E-05	0,01	0,01393919096	NA	FALSE	FALSE
BigCC100_13967	49	0,12	1,01	1	0,01682	-8,00E-06	-2,88E-04	-0,01	-0,01435529298	5,169925001	FALSE	FALSE
BigCC100_1397	70	0,13	1	1	0,016576	2,44E-04	-3,60E-05	0	0	NA	FALSE	FALSE
BigCC100_1398	180	0,13	1,01	1,03	0,016732	7,20E-05	-2,32E-04	0,02	0,02828904443	NA	FALSE	FALSE
BigCC100_13980	31	0,11	1,01	1,03	0,016756	-2,40E-05	-2,20E-04	0,02	0,02828904443	3,196397213	FALSE	FALSE
BigCC100_13981	124	0,13	0,99	0,99	0,016596	-4,00E-05	2,28E-04	0	0	NA	FALSE	FALSE
BigCC100_1399	84	0,14	0,98	0,99	0,016724	-1,84E-04	-4,00E-06	0,01	0,01464677596	-5,523561956	FALSE	FALSE
BigCC100_13990	32	0,11	1,02	1,04	0,016516	3,00E-04	0	0,02	0,02801437617	-Inf	FALSE	FALSE
BigCC100_13996	54	0,13	1	0,99	0,016548	2,60E-04	1,60E-05	-0,01	-0,0144995697	-4,022367813	FALSE	FALSE
BigCC100_13999	124	0,13	1,01	1,01	0,016744	-9,60E-05	-1,24E-04	0	0	0,3692338097	FALSE	FALSE
BigCC100_14	1794	3,88	4,97	10,75	0,033204	0,015452	0,002384	5,78	1,113018903	-2,696337442	FALSE	FALSE
BigCC100_140	4036	0,87	3,52	2,54	0,016544	0,058388	1,52E-04	-0,98	-0,4707469319	-8,585456761	FALSE	FALSE
BigCC100_1400	194	0,13	1,02	1,01	0,016856	-3,04E-04	-2,00E-04	-0,01	-0,01421385922	-0,6040713237	FALSE	FALSE
BigCC100_14002	54	0,12	1	1,03	0,0166	2,00E-04	-8,40E-05	0,03	0,04264433741	NA	FALSE	FALSE
BigCC100_14009	109	0,12	1,02	1,02	0,016592	2,80E-05	2,16E-04	0	0	2,94753258	FALSE	FALSE
BigCC100_1401	80	0,12	1,01	1,02	0,016712	-6,80E-05	-9,20E-05	0,01	0,01421385922	0,4360991148	FALSE	FALSE
BigCC100_14013	51	0,11	1,02	1,03	0,016588	2,44E-04	2,48E-04	0,01	0,01407518521	0,02345897282	FALSE	FALSE
BigCC100_14018	55	0,12	1	1	0,016812	1,20E-05	-1,92E-04	0	0	NA	FALSE	FALSE
BigCC100_1403	319	0,23	1,08	5,15	0,016668	-1,76E-04	1,68E-04	4,07	2,25354112	NA	FALSE	FALSE
BigCC100_1404	43	0,12	1,01	1,01	0,016748	-1,36E-04	6,80E-05	0	0	NA	FALSE	FALSE
BigCC100_14052	47	0,11	1	1,03	0,016592	0	2,36E-04	0,03	0,04264433741	Inf	FALSE	FALSE
BigCC100_14053	33	0,11	1,01	1,01	0,01686	-2,72E-04	-2,00E-05	0	0	-3,765534746	FALSE	FALSE
BigCC100_1407	76	0,12	1	1,02	0,016568	-8,00E-06	2,60E-04	0,02	0,0285691522	NA	FALSE	FALSE
BigCC100_14079	152	0,12	1	1,03	0,016824	-4,40E-05	-8,00E-06	0,03	0,04264433741	-2,459431619	FALSE	FALSE
BigCC100_1408	94	0,12	1,01	1	0,016576	-6,00E-05	-5,60E-05	-0,01	-0,01435529298	-0,09953567355	FALSE	FALSE
BigCC100_14098	33	0,11	1,01	1,03	0,016548	-1,20E-05	-4,00E-06	0,02	0,02828904443	-1,584962501	FALSE	FALSE
BigCC100_141	1882	4,09	4,7	86,86	0,033696	0,01458	3,60E-04	82,16	4,207959291	-5,339850003	FALSE	FALSE
BigCC100_1410	43	0,13	0,99	0,99	0,016728	6,00E-05	-7,60E-05	0	0	NA	FALSE	FALSE
BigCC100_1411	462	0,22	1,08	3,14	0,016812	-8,00E-05	1,60E-05	2,06	1,539733247	NA	FALSE	FALSE
BigCC100_1412	119	0,12	1,02	1,01	0,016572	8,00E-06	2,68E-04	-0,01	-0,01421385922	5,06608919	FALSE	FALSE
BigCC100_14129	56	0,13	1,01	0,99	0,01682	-2,80E-05	-1,60E-04	-0,02	-0,02885486267	2,514573173	FALSE	FALSE
BigCC100_14138	60	0,14	0,98	1,01	0,016804	-2,48E-04	-2,24E-04	0,03	0,04350163864	-0,1468413883	FALSE	FALSE
BigCC100_1414	155	0,14	0,99	0,98	0,016748	7,20E-05	-1,32E-04	-0,01	-0,01464677596	NA	FALSE	FALSE
BigCC100_14140	32	0,12	1	1,01	0,016808	-2,28E-04	-1,28E-04	0,01	0,01435529298	-0,8328900142	FALSE	FALSE
BigCC100_14141	37	0,13	0,99	0,99	0,016524	8,40E-05	1,60E-05	0	0	-2,392317423	FALSE	FALSE
BigCC100_14143	40	0,11	1,03	1,03	0,016696	1,20E-04	-1,44E-04	0	0	NA	FALSE	FALSE
BigCC100_14145	41	0,11	1,03	1,01	0,016588	-6,40E-05	7,20E-05	-0,02	-0,02828904443	NA	FALSE	FALSE
BigCC100_1415	562	0,16	1,05	4,05	0,016856	-9,20E-05	-3,12E-04	3	1,94753258	1,761840263	FALSE	FALSE
BigCC100_1419	75	0,13	0,99	0,99	0,016524	-1,20E-05	6,80E-05	0	0	NA	FALSE	FALSE
BigCC100_14193	60	0,11	1,03	1,02	0,016548	2,84E-04	2,04E-04	-0,01	-0,01407518521	-0,4773217775	FALSE	FALSE
BigCC100_142	1730	3,76	4,53	157,5	0,031704	0,012604	3,48E-04	152,97	5,119696968	-5,178650543	FALSE	FALSE
BigCC100_14224	37	0,13	1	1,01	0,016608	1,96E-04	2,16E-04	0,01	0,01435529298	0,140177658	FALSE	FALSE
BigCC100_1424	227	0,13	1,01	0,99	0,016608	-8,00E-06	2,32E-04	-0,02	-0,02885486267	NA	FALSE	FALSE
BigCC100_1425	97	0,12	1	1,01	0,016584	1,20E-05	1,60E-04	0,01	0,01435529298	3,736965594	FALSE	FALSE
BigCC100_14252	33	0,13	0,99	1,01	0,016816	1,60E-05	-1,52E-04	0,02	0,02885486267	NA	FALSE	FALSE
BigCC100_1426	35	0,11	1,03	1,01	0,016804	-2,76E-04	8,00E-06	-0,02	-0,02828904443	NA	FALSE	FALSE
BigCC100_14267	33	0,14	0,98	0,98	0,016536	1,08E-04	3,20E-05	0	0	-1,754887502	FALSE	FALSE
BigCC100_1427	102	0,14	1	0,99	0,016572	-5,60E-05	2,40E-04	-0,01	-0,0144995697	NA	FALSE	FALSE
BigCC100_1429	241	0,14	0,98	0,98	0,016644	1,68E-04	1,16E-04	0	0	-0,5343364277	FALSE	FALSE
BigCC100_14295	42	0,11	1,01	1,04	0,0168	-2,28E-04	-2,52E-04	0,03	0,04222823539	0,1443899093	FALSE	FALSE
BigCC100_14298	79	0,11	1,02	1,01	0,016836	-2,72E-04	8,00E-06	-0,01	-0,01421385922	NA	FALSE	FALSE
BigCC100_14299	38	0,13	0,99	0,99	0,016756	-1,56E-04	-2,36E-04	0	0	0,5972408305	FALSE	FALSE
BigCC100_143	2258	5,5	5,47	24,27	0,04278	0,0209	4,12E-04	18,8	2,14956137	-5,664714795	FALSE	FALSE
BigCC100_1430	88	0,12	1,01	1,01	0,01666	-4,40E-05	-1,52E-04	0	0	1,788495895	FALSE	FALSE
BigCC100_14300	38	0,13	0,99	0,99	0,016516	3,24E-04	6,80E-05	0	0	-2,252387162	FALSE	FALSE
BigCC100_1431	36	0,14	0,99	0,98	0,016692	6,40E-05	-6,00E-05	-0,01	-0,01464677596	NA	FALSE	FALSE
BigCC100_1432	309	0,16	1,01	1,05	0,016828	-2,96E-04	-2,44E-04	0,04	0,05603403491	-0,2787160281	FALSE	FALSE
BigCC100_14334	31	0,12	1	1,02	0,016796	-8,80E-05	-6,00E-05	0,02	0,0285691522	-0,552541023	FALSE	FALSE
BigCC100_14339	49	0,13	0,99	0,99	0,016656	1,04E-04	1,04E-04	0	0	0	FALSE	FALSE
BigCC100_1434	63	0,11	1,01	1,01	0,016828	-1,32E-04	-7,60E-05	0	0	-0,7964666059	FALSE	FALSE
BigCC100_14341	247	0,15	1,02	1,03	0,0166	1,60E-04	2,36E-04	0,01	0,01407518521	0,5607149545	FALSE	FALSE
BigCC100_14343	32	0,12	1,02	1	0,016732	-2,12E-04	-2,04E-04	-0,02	-0,0285691522	-0,05549511259	FALSE	FALSE
BigCC100_14345	33	0,11	1,03	1,01	0,016556	1,28E-04	4,00E-05	-0,02	-0,02828904443	-1,678071905	FALSE	FALSE
BigCC100_14346	34	0,13	1,01	1	0,016552	3,04E-04	-3,60E-05	-0,01	-0,01435529298	NA	FALSE	FALSE
BigCC100_14347	52	0,11	1,02	1,04	0,016712	-1,80E-04	-1,60E-04	0,02	0,02801437617	-0,1699250014	FALSE	FALSE
BigCC100_1435	93	0,12	1	1	0,016852	-5,20E-05	-3,40E-04	0	0	2,708951218	FALSE	FALSE
BigCC100_14352	40	0,13	0,99	0,99	0,016824	1,20E-05	-3,20E-04	0	0	NA	FALSE	FALSE
BigCC100_14353	108	0,13	1,02	1,04	0,016812	1,20E-05	-4,00E-06	0,02	0,02801437617	NA	FALSE	FALSE
BigCC100_1437	88	0,12	1,02	1	0,016848	-2,04E-04	-2,64E-04	-0,02	-0,0285691522	0,3719687774	FALSE	FALSE
BigCC100_14371	35	0,14	1	0,98	0,016832	-1,20E-05	-8,40E-05	-0,02	-0,02914634566	2,807354922	FALSE	FALSE
BigCC100_1439	45	0,12	1,03	1	0,016856	-1,88E-04	-2,32E-04	-0,03	-0,04264433741	0,3033921434	FALSE	FALSE
BigCC100_14394	40	0,13	0,99	0,99	0,016792	2,00E-05	-9,20E-05	0	0	NA	FALSE	FALSE
BigCC100_144	1542	2,5	2,7	5,75	0,0247	0,011904	3,32E-04	3,05	1,090602549	-5,16411938	FALSE	FALSE
BigCC100_1440	215	0,14	1	0,99	0,016824	-2,32E-04	-2,12E-04	-0,01	-0,0144995697	-0,1300605406	FALSE	FALSE
BigCC100_14405	45	0,12	1	1	0,016592	1,20E-05	6,00E-05	0	0	2,321928095	FALSE	FALSE
BigCC100_1441	69	0,14	0,99	1	0,016596	1,48E-04	-2,00E-05	0,01	0,0144995697	NA	FALSE	FALSE
BigCC100_14415	74	0,13	0,99	0,99	0,016836	-2,60E-04	-2,52E-04	0	0	-0,04508788953	FALSE	FALSE
BigCC100_14417	60	0,11	1,01	1,04	0,016852	-2,72E-04	-1,20E-05	0,03	0,04222823539	-4,502500341	FALSE	FALSE
BigCC100_14419	38	0,13	1,01	0,99	0,016648	-1,08E-04	1,56E-04	-0,02	-0,02885486267	NA	FALSE	FALSE
BigCC100_1442	119	0,14	1	1	0,016828	-1,16E-04	-7,20E-05	0	0	-0,6880559937	FALSE	FALSE
BigCC100_1443	204	0,12	1,02	1,02	0,0168	-2,08E-04	-7,20E-05	0	0	-1,530514717	FALSE	FALSE
BigCC100_1444	303	0,16	1,05	2,08	0,016556	-4,00E-06	1,36E-04	1,03	0,9861942005	NA	FALSE	FALSE
BigCC100_1445	122	0,14	1	0,99	0,016852	-3,04E-04	-1,76E-04	-0,01	-0,0144995697	-0,7884958948	FALSE	FALSE
BigCC100_1447	35	0,13	1	0,99	0,01656	6,00E-05	1,68E-04	-0,01	-0,0144995697	1,485426827	FALSE	FALSE
BigCC100_1448	232	0,15	1	1	0,016836	-3,04E-04	-3,12E-04	0	0	0,03747470542	FALSE	FALSE
BigCC100_14487	59	0,12	1,01	1	0,016524	2,32E-04	8,80E-05	-0,01	-0,01435529298	-1,398549376	FALSE	FALSE
BigCC100_1449	219	0,14	1,02	1,06	0,01656	-2,40E-05	2,68E-04	0,04	0,05549511259	NA	FALSE	FALSE
BigCC100_14495	37	0,13	0,98	0,99	0,016744	4,00E-06	-6,80E-05	0,01	0,01464677596	NA	FALSE	FALSE
BigCC100_145	1717	3,5	4,08	1935,33	0,030852	0,014052	3,92E-04	1931,25	8,889794719	-5,163778017	TRUE	FALSE
BigCC100_1450	36	0,13	1,01	0,99	0,016804	-2,76E-04	-2,96E-04	-0,02	-0,02885486267	0,1009289089	FALSE	FALSE
BigCC100_1451	63	0,11	1,02	1,01	0,016712	-1,04E-04	1,40E-04	-0,01	-0,01421385922	NA	FALSE	FALSE
BigCC100_14518	44	0,13	1,01	0,99	0,01682	-2,80E-04	-2,76E-04	-0,02	-0,02885486267	-0,02075856017	FALSE	FALSE
BigCC100_1452	63	0,13	1,01	1,02	0,016636	-8,80E-05	2,04E-04	0,01	0,01421385922	NA	FALSE	FALSE
BigCC100_14520	37	0,13	1	0,99	0,016816	-1,00E-04	4,00E-06	-0,01	-0,0144995697	NA	FALSE	FALSE
BigCC100_14524	64	0,14	1	0,99	0,016604	1,16E-04	2,00E-04	-0,01	-0,0144995697	0,7858751946	FALSE	FALSE
BigCC100_14528	44	0,13	0,99	0,99	0,016576	-4,80E-05	-2,00E-05	0	0	-1,263034406	FALSE	FALSE
BigCC100_14529	84	0,14	1,01	0,99	0,01654	2,56E-04	1,92E-04	-0,02	-0,02885486267	-0,4150374993	FALSE	FALSE
BigCC100_1454	40	0,14	0,99	1,01	0,01664	8,80E-05	1,12E-04	0,02	0,02885486267	0,3479233034	FALSE	FALSE
BigCC100_14542	42	0,13	0,99	0,99	0,01658	-6,40E-05	-5,60E-05	0	0	-0,1926450779	FALSE	FALSE
BigCC100_14547	59	0,11	1,03	1,01	0,016528	1,96E-04	8,00E-06	-0,02	-0,02828904443	-4,614709844	FALSE	FALSE
BigCC100_1456	44	0,13	1	0,99	0,01652	2,96E-04	3,20E-05	-0,01	-0,0144995697	-3,209453366	FALSE	FALSE
BigCC100_14567	38	0,13	1,01	0,99	0,016612	2,12E-04	-8,40E-05	-0,02	-0,02885486267	NA	FALSE	FALSE
BigCC100_1457	312	0,13	1,01	1	0,016596	1,84E-04	2,40E-05	-0,01	-0,01435529298	-2,938599455	FALSE	FALSE
BigCC100_14586	50	0,13	1,01	0,99	0,016524	-8,00E-06	2,00E-04	-0,02	-0,02885486267	NA	FALSE	FALSE
BigCC100_1459	296	0,2	1,05	2,09	0,016536	5,20E-05	2,16E-04	1,04	0,9931136144	2,054447784	FALSE	FALSE
BigCC100_14598	65	0,12	1,02	1	0,016608	-8,80E-05	-2,00E-05	-0,02	-0,0285691522	-2,137503524	FALSE	FALSE
BigCC100_146	292	0,21	1,07	1,06	0,016736	-1,96E-04	8,00E-05	-0,01	-0,01354653184	NA	FALSE	FALSE
BigCC100_1460	121	0,15	1,01	0,99	0,016812	-2,72E-04	-8,00E-06	-0,02	-0,02885486267	-5,087462841	FALSE	FALSE
BigCC100_1461	193	0,13	1,03	1,01	0,016736	0	-2,16E-04	-0,02	-0,02828904443	NA	FALSE	FALSE
BigCC100_1462	169	0,14	1,04	1,02	0,01658	-4,00E-05	2,12E-04	-0,02	-0,02801437617	NA	FALSE	FALSE
BigCC100_14622	35	0,13	1	0,99	0,016624	-6,00E-05	1,28E-04	-0,01	-0,0144995697	NA	FALSE	FALSE
BigCC100_14623	34	0,13	1	1,02	0,0166	1,20E-05	9,20E-05	0,02	0,0285691522	2,938599455	FALSE	FALSE
BigCC100_1463	176	0,14	1,01	0,99	0,01654	4,00E-05	4,40E-05	-0,02	-0,02885486267	0,1375035237	FALSE	FALSE
BigCC100_14639	43	0,13	1	0,99	0,01652	8,00E-05	2,88E-04	-0,01	-0,0144995697	1,847996907	FALSE	FALSE
BigCC100_1464	150	0,13	1,01	1	0,016524	2,80E-05	2,64E-04	-0,01	-0,01435529298	3,237039197	FALSE	FALSE
BigCC100_14640	52	0,13	1,01	0,99	0,01674	7,60E-05	-1,08E-04	-0,02	-0,02885486267	NA	FALSE	FALSE
BigCC100_14646	50	0,13	1	1,01	0,016812	2,00E-05	-2,88E-04	0,01	0,01435529298	NA	FALSE	FALSE
BigCC100_1465	66	0,13	1,01	1	0,016712	4,00E-06	1,08E-04	-0,01	-0,01435529298	4,754887502	FALSE	FALSE
BigCC100_14671	51	0,13	1	0,99	0,016712	3,20E-05	9,60E-05	-0,01	-0,0144995697	1,584962501	FALSE	FALSE
BigCC100_1469	76	0,14	1	0,98	0,016788	-4,80E-05	-2,64E-04	-0,02	-0,02914634566	2,459431619	FALSE	FALSE
BigCC100_147	1107	1,09	1,68	540,1	0,016808	-2,84E-04	-2,08E-04	538,42	8,328621505	-0,4493074014	TRUE	FALSE
BigCC100_1470	41	0,11	1	1,01	0,016716	3,60E-05	-1,04E-04	0,01	0,01435529298	NA	FALSE	FALSE
BigCC100_1471	216	0,16	0,98	0,99	0,016676	-1,32E-04	-1,60E-04	0,01	0,01464677596	0,2775339755	FALSE	FALSE
BigCC100_1472	302	0,16	1,04	1,03	0,016828	-1,00E-04	-7,60E-05	-0,01	-0,01393919096	-0,3959286763	FALSE	FALSE
BigCC100_14722	111	0,15	1,01	0,99	0,01654	2,80E-04	8,00E-06	-0,02	-0,02885486267	-5,129283017	FALSE	FALSE
BigCC100_14723	46	0,13	1,01	0,99	0,016764	-2,80E-05	4,00E-05	-0,02	-0,02885486267	NA	FALSE	FALSE
BigCC100_1473	833	0,26	1,1	6,13	0,016596	0	5,20E-05	5,03	2,47838355	Inf	FALSE	FALSE
BigCC100_14732	41	0,13	1,01	1,06	0,016832	1,20E-05	-2,40E-04	0,05	0,06970897181	NA	FALSE	FALSE
BigCC100_14735	33	0,11	1,03	1,01	0,016572	-5,20E-05	2,44E-04	-0,02	-0,02828904443	NA	FALSE	FALSE
BigCC100_14737	71	0,12	1	1,03	0,016684	1,68E-04	-1,48E-04	0,03	0,04264433741	NA	FALSE	FALSE
BigCC100_1474	136	0,16	1	1,02	0,016828	-1,84E-04	-2,84E-04	0,02	0,0285691522	0,6261851634	FALSE	FALSE
BigCC100_14741	34	0,11	1,01	1,01	0,016524	3,20E-04	6,40E-05	0	0	-2,321928095	FALSE	FALSE
BigCC100_14747	36	0,13	0,99	0,99	0,0168	-2,52E-04	-6,00E-05	0	0	-2,070389328	FALSE	FALSE
BigCC100_1475	77	0,14	0,99	0,99	0,016828	-9,20E-05	-3,08E-04	0	0	1,743224585	FALSE	FALSE
BigCC100_1476	63	0,13	1,01	0,99	0,01656	0	-2,40E-05	-0,02	-0,02885486267	NA	FALSE	FALSE
BigCC100_1477	90	0,12	1,02	1	0,016536	3,60E-05	3,60E-05	-0,02	-0,0285691522	0	FALSE	FALSE
BigCC100_1478	223	0,14	1,02	1,02	0,016668	-1,44E-04	-1,60E-04	0	0	0,1520030934	FALSE	FALSE
BigCC100_1479	130	0,12	1,03	1,01	0,016804	2,00E-05	-2,20E-04	-0,02	-0,02828904443	NA	FALSE	FALSE
BigCC100_148	1193	1,82	2,26	22,22	0,02106	0,007216	0,00108	19,96	3,297464139	-2,740168026	FALSE	FALSE
BigCC100_14801	52	0,12	1,01	1	0,016824	-2,80E-04	-2,60E-04	-0,01	-0,01435529298	-0,1069152039	FALSE	FALSE
BigCC100_14802	33	0,12	1,02	1	0,01648	1,16E-04	1,16E-04	-0,02	-0,0285691522	0	FALSE	FALSE
BigCC100_14809	44	0,12	1	1,01	0,01652	4,00E-06	1,12E-04	0,01	0,01435529298	4,807354922	FALSE	FALSE
BigCC100_1481	42	0,11	1,02	1,02	0,016596	-8,40E-05	2,00E-05	0	0	NA	FALSE	FALSE
BigCC100_14810	50	0,12	1	1	0,016812	1,60E-05	-4,00E-06	0	0	NA	FALSE	FALSE
BigCC100_14828	56	0,11	1,02	1,01	0,016856	-3,20E-05	-1,24E-04	-0,01	-0,01421385922	1,95419631	FALSE	FALSE
BigCC100_1483	221	0,12	1,02	1,01	0,016816	-1,64E-04	-2,88E-04	-0,01	-0,01421385922	0,8123729968	FALSE	FALSE
BigCC100_14834	49	0,12	1,02	1	0,016544	2,04E-04	4,00E-06	-0,02	-0,0285691522	-5,672425342	FALSE	FALSE
BigCC100_14835	35	0,11	1	1,01	0,016656	-1,32E-04	-4,40E-05	0,01	0,01435529298	-1,584962501	FALSE	FALSE
BigCC100_1484	271	0,13	1,02	1,01	0,016488	3,28E-04	2,40E-05	-0,01	-0,01421385922	-3,772589504	FALSE	FALSE
BigCC100_1485	177	0,16	1,01	1,01	0,016836	-2,72E-04	-2,92E-04	0	0	0,1023617176	FALSE	FALSE
BigCC100_1488	38	0,12	1	1,02	0,016648	1,68E-04	1,60E-04	0,02	0,0285691522	-0,07038932789	FALSE	FALSE
BigCC100_1489	84	0,13	0,99	0,99	0,016816	2,80E-05	-5,60E-05	0	0	NA	FALSE	FALSE
BigCC100_149	3087	4,73	6,39	10,07	0,039204	0,040004	5,16E-04	3,68	0,6561758471	-6,276629386	FALSE	FALSE
BigCC100_1490	38	0,11	1,01	1,01	0,016756	-2,12E-04	-1,32E-04	0	0	-0,6835263352	FALSE	FALSE
BigCC100_1492	183	0,12	1,02	1,01	0,016616	2,28E-04	-8,00E-05	-0,01	-0,01421385922	NA	FALSE	FALSE
BigCC100_1493	33	0,13	0,99	0,99	0,016808	-2,88E-04	-2,76E-04	0	0	-0,06140054466	FALSE	FALSE
BigCC100_1494	603	0,31	1,15	3,14	0,016556	2,72E-04	-2,00E-05	1,99	1,449130698	NA	FALSE	FALSE
BigCC100_1495	95	0,12	1	1	0,016692	-1,76E-04	4,40E-05	0	0	NA	FALSE	FALSE
BigCC100_14951	40	0,13	1,02	1	0,01674	-1,44E-04	-1,08E-04	-0,02	-0,0285691522	-0,4150374993	FALSE	FALSE
BigCC100_14954	80	0,12	1,02	1,01	0,016844	-3,04E-04	-1,96E-04	-0,01	-0,01421385922	-0,6332176693	FALSE	FALSE
BigCC100_1496	146	0,12	1	1,03	0,016536	2,20E-04	-2,00E-05	0,03	0,04264433741	NA	FALSE	FALSE
BigCC100_1497	36	0,12	1	1	0,016824	1,60E-05	-2,84E-04	0	0	NA	FALSE	FALSE
BigCC100_14997	33	0,12	0,99	1	0,016832	-2,96E-04	-1,64E-04	0,01	0,0144995697	-0,851901361	FALSE	FALSE
BigCC100_14998	48	0,13	1,01	0,99	0,016552	4,80E-05	2,48E-04	-0,02	-0,02885486267	2,36923381	FALSE	FALSE
BigCC100_14999	100	0,12	1,02	1	0,016672	-1,36E-04	-4,00E-05	-0,02	-0,0285691522	-1,765534746	FALSE	FALSE
BigCC100_15	1808	4,05	4,76	126,38	0,0331	0,015288	3,20E-04	121,62	4,730662787	-5,578183968	FALSE	FALSE
BigCC100_150	491	0,22	1,08	2,08	0,01674	1,20E-04	8,00E-05	1	0,945552216	-0,5849625007	FALSE	FALSE
BigCC100_1500	46	0,11	1,01	1,01	0,01654	-8,00E-06	1,84E-04	0	0	NA	FALSE	FALSE
BigCC100_15009	46	0,12	1,02	1,06	0,01658	7,20E-05	2,36E-04	0,04	0,05549511259	1,712718048	FALSE	FALSE
BigCC100_1501	221	0,13	1,02	1	0,016664	-1,60E-04	-1,48E-04	-0,02	-0,0285691522	-0,1124747293	FALSE	FALSE
BigCC100_15017	79	0,12	1	1	0,016748	6,40E-05	5,60E-05	0	0	-0,1926450779	FALSE	FALSE
BigCC100_1502	96	0,12	1,01	1,03	0,016584	-6,40E-05	7,60E-05	0,02	0,02828904443	NA	FALSE	FALSE
BigCC100_15029	37	0,13	0,99	0,99	0,016712	1,32E-04	-1,80E-04	0	0	NA	FALSE	FALSE
BigCC100_1506	249	0,13	1,01	0,99	0,016804	1,20E-05	-1,92E-04	-0,02	-0,02885486267	NA	FALSE	FALSE
BigCC100_15061	50	0,11	1,01	1,04	0,016672	-6,80E-05	1,60E-05	0,03	0,04222823539	NA	FALSE	FALSE
BigCC100_15062	34	0,14	0,98	0,98	0,01684	-8,00E-06	-1,24E-04	0	0	3,95419631	FALSE	FALSE
BigCC100_15066	92	0,13	1	0,99	0,016648	-1,16E-04	-1,24E-04	-0,01	-0,0144995697	0,09621531526	FALSE	FALSE
BigCC100_15068	66	0,11	1,03	1,03	0,016544	0	2,00E-04	0	0	Inf	FALSE	FALSE
BigCC100_15071	42	0,13	1,01	0,98	0,01686	-2,08E-04	-1,36E-04	-0,03	-0,04350163864	-0,6129768769	FALSE	FALSE
BigCC100_15072	33	0,11	1,01	1,03	0,016564	-6,00E-05	2,52E-04	0,02	0,02828904443	NA	FALSE	FALSE
BigCC100_151	2292	0,93	1,55	2,83	0,01654	0,017004	-2,40E-05	1,28	0,8685338376	NA	FALSE	FALSE
BigCC100_15103	31	0,13	1,01	0,99	0,016564	2,72E-04	4,00E-05	-0,02	-0,02885486267	-2,765534746	FALSE	FALSE
BigCC100_1512	48	0,11	1,01	1	0,01654	2,60E-04	1,24E-04	-0,01	-0,01435529298	-1,068171503	FALSE	FALSE
BigCC100_15125	38	0,13	1,01	0,99	0,016576	2,00E-05	2,52E-04	-0,02	-0,02885486267	3,655351829	FALSE	FALSE
BigCC100_1513	31	0,11	1,03	1,04	0,016564	1,96E-04	4,80E-05	0,01	0,01393919096	-2,029747343	FALSE	FALSE
BigCC100_1514	35	0,12	1	1,02	0,01684	-2,40E-05	-1,08E-04	0,02	0,0285691522	2,169925001	FALSE	FALSE
BigCC100_15142	40	0,13	1	0,97	0,016588	1,84E-04	-4,80E-05	-0,03	-0,04394334759	NA	FALSE	FALSE
BigCC100_15149	37	0,13	0,98	1,02	0,016576	2,80E-04	4,80E-05	0,04	0,05771549786	-2,544320516	FALSE	FALSE
BigCC100_1515	170	0,14	1	0,98	0,01668	7,60E-05	-9,20E-05	-0,02	-0,02914634566	NA	FALSE	FALSE
BigCC100_1516	119	0,12	1,01	1,02	0,016824	-2,32E-04	-6,00E-05	0,01	0,01421385922	-1,9510904	FALSE	FALSE
BigCC100_1517	95	0,11	1,03	0,99	0,016564	3,60E-05	2,52E-04	-0,04	-0,0571439071	2,807354922	FALSE	FALSE
BigCC100_1518	344	0,13	1,01	1,04	0,016812	-6,80E-05	-4,80E-05	0,03	0,04222823539	-0,5025003405	FALSE	FALSE
BigCC100_1519	244	0,13	1,03	1,03	0,016704	1,24E-04	1,20E-04	0	0	-0,04730571478	FALSE	FALSE
BigCC100_152	1760	3,85	4,66	34,62	0,03254	0,014844	3,36E-04	29,96	2,893203865	-5,465274863	FALSE	FALSE
BigCC100_1521	50	0,11	1,03	1,04	0,016568	2,48E-04	2,80E-04	0,01	0,01393919096	0,1750867066	FALSE	FALSE
BigCC100_1523	180	0,15	1,04	1,02	0,016848	-3,24E-04	-2,80E-05	-0,02	-0,02801437617	-3,532495081	FALSE	FALSE
BigCC100_15263	32	0,12	1	0,99	0,016584	1,56E-04	2,32E-04	-0,01	-0,0144995697	0,5725787763	FALSE	FALSE
BigCC100_1527	473	0,2	1,02	3,08	0,016744	-1,84E-04	6,40E-05	2,06	1,594361199	NA	FALSE	FALSE
BigCC100_1528	417	0,25	1,07	2,09	0,016812	-1,08E-04	-2,48E-04	1,02	0,9658921457	1,199308808	FALSE	FALSE
BigCC100_1529	139	0,12	1	1,04	0,016852	-1,48E-04	-2,76E-04	0,04	0,05658352837	0,8990710911	FALSE	FALSE
BigCC100_153	1575	2,82	3,07	5,5	0,027584	0,010488	2,40E-04	2,43	0,841192963	-5,449561375	FALSE	FALSE
BigCC100_1532	356	0,13	1	1,01	0,016808	0	1,20E-05	0,01	0,01435529298	Inf	FALSE	FALSE
BigCC100_15323	84	0,14	1,01	1,01	0,016596	1,60E-05	5,60E-05	0	0	1,807354922	FALSE	FALSE
BigCC100_15324	37	0,13	0,99	0,98	0,0167	6,00E-05	-4,00E-06	-0,01	-0,01464677596	NA	FALSE	FALSE
BigCC100_15329	109	0,13	1,01	1,04	0,016704	-2,80E-05	-1,52E-04	0,03	0,04222823539	2,440572591	FALSE	FALSE
BigCC100_1533	41	0,13	0,99	0,99	0,016564	-3,20E-05	1,60E-05	0	0	NA	FALSE	FALSE
BigCC100_15333	54	0,13	0,99	0,97	0,016708	-1,36E-04	1,24E-04	-0,02	-0,02944377789	NA	FALSE	FALSE
BigCC100_15335	32	0,11	1,01	1,03	0,016832	-2,76E-04	-6,40E-05	0,02	0,02828904443	-2,108524457	FALSE	FALSE
BigCC100_15349	81	0,12	1	0,99	0,016476	2,72E-04	1,16E-04	-0,01	-0,0144995697	-1,229481846	FALSE	FALSE
BigCC100_1535	90	0,14	0,99	1,02	0,016812	2,00E-05	2,40E-05	0,03	0,04306872189	0,2630344058	FALSE	FALSE
BigCC100_15351	35	0,13	1	0,99	0,016804	-1,88E-04	3,60E-05	-0,01	-0,0144995697	NA	FALSE	FALSE
BigCC100_15352	34	0,11	1,02	1,03	0,01682	-2,88E-04	-2,80E-04	0,01	0,01407518521	-0,0406419845	FALSE	FALSE
BigCC100_1536	55	0,11	1,04	1,01	0,016596	-6,00E-05	2,28E-04	-0,03	-0,04222823539	NA	FALSE	FALSE
BigCC100_1538	403	0,14	1,02	1	0,0168	-2,60E-04	-1,84E-04	-0,02	-0,0285691522	-0,498805857	FALSE	FALSE
BigCC100_1539	499	0,16	1	1,03	0,016644	1,84E-04	1,00E-04	0,03	0,04264433741	-0,8797057663	FALSE	FALSE
BigCC100_154	3704	5,64	7,78	15,77	0,046124	0,056632	3,68E-04	7,99	1,0193406	-7,265767904	FALSE	FALSE
BigCC100_1542	182	0,12	1,01	0,99	0,016848	-1,56E-04	-1,12E-04	-0,02	-0,02885486267	-0,4780472968	FALSE	FALSE
BigCC100_15423	118	0,12	1	1,03	0,016532	3,00E-04	6,40E-05	0,03	0,04264433741	-2,22881869	FALSE	FALSE
BigCC100_15430	47	0,12	1	1	0,016536	-5,20E-05	-4,00E-06	0	0	-3,700439718	FALSE	FALSE
BigCC100_15433	43	0,11	1,03	1,03	0,016512	1,36E-04	0	0	0	-Inf	FALSE	FALSE
BigCC100_15434	45	0,11	1,01	1	0,016704	-4,80E-05	-8,80E-05	-0,01	-0,01435529298	0,8744691179	FALSE	FALSE
BigCC100_15436	65	0,12	1,02	1,03	0,016844	-3,04E-04	-8,80E-05	0,01	0,01407518521	-1,788495895	FALSE	FALSE
BigCC100_15437	61	0,12	1,01	1	0,016608	1,00E-04	2,40E-04	-0,01	-0,01435529298	1,263034406	FALSE	FALSE
BigCC100_15439	45	0,12	1,02	1,02	0,016804	-2,08E-04	2,40E-05	0	0	NA	FALSE	FALSE
BigCC100_1544	55	0,12	1	0,98	0,016772	-1,16E-04	-1,84E-04	-0,02	-0,02914634566	0,6655809609	FALSE	FALSE
BigCC100_15440	40	0,12	1	1,03	0,01682	-6,40E-05	-2,96E-04	0,03	0,04264433741	2,209453366	FALSE	FALSE
BigCC100_15443	42	0,12	1	1	0,016556	2,72E-04	2,72E-04	0	0	0	FALSE	FALSE
BigCC100_15445	101	0,13	1,01	1,03	0,016616	1,60E-05	-6,80E-05	0,02	0,02828904443	NA	FALSE	FALSE
BigCC100_15446	132	0,14	1	0,98	0,01652	6,00E-05	3,28E-04	-0,02	-0,02914634566	2,450661409	FALSE	FALSE
BigCC100_15447	59	0,12	1,02	1,03	0,01656	-2,40E-05	-2,00E-05	0,01	0,01407518521	-0,2630344058	FALSE	FALSE
BigCC100_1545	288	0,12	1,01	1,04	0,016532	1,04E-04	2,76E-04	0,03	0,04222823539	1,408084739	FALSE	FALSE
BigCC100_15452	68	0,13	1,02	1,02	0,016836	-7,20E-05	-2,40E-05	0	0	-1,584962501	FALSE	FALSE
BigCC100_15454	31	0,13	1	0,99	0,016752	-2,28E-04	-1,52E-04	-0,01	-0,0144995697	-0,5849625007	FALSE	FALSE
BigCC100_15457	117	0,13	0,99	0,98	0,016548	-2,00E-05	2,00E-04	-0,01	-0,01464677596	NA	FALSE	FALSE
BigCC100_15459	38	0,13	0,99	1,02	0,01658	-8,00E-06	-3,20E-05	0,03	0,04306872189	2	FALSE	FALSE
BigCC100_15464	62	0,11	1,03	1,03	0,016608	1,92E-04	2,24E-04	0	0	0,2223924213	FALSE	FALSE
BigCC100_15466	45	0,12	1,02	0,99	0,016604	-4,00E-06	2,24E-04	-0,03	-0,04306872189	NA	FALSE	FALSE
BigCC100_15467	37	0,13	0,99	1,01	0,016712	4,40E-05	-6,80E-05	0,02	0,02885486267	NA	FALSE	FALSE
BigCC100_15468	64	0,12	1	1	0,016852	-1,88E-04	-9,60E-05	0	0	-0,969626351	FALSE	FALSE
BigCC100_1547	883	0,19	1,03	1	0,016816	-1,16E-04	-2,80E-04	-0,03	-0,04264433741	1,271302022	FALSE	FALSE
BigCC100_15470	71	0,13	0,99	0,99	0,016548	5,60E-05	2,00E-05	0	0	-1,485426827	FALSE	FALSE
BigCC100_15471	40	0,12	1,01	1	0,016548	-9,60E-05	3,08E-04	-0,01	-0,01435529298	NA	FALSE	FALSE
BigCC100_15474	102	0,12	1,03	1	0,016748	6,00E-05	1,20E-05	-0,03	-0,04264433741	-2,321928095	FALSE	FALSE
BigCC100_15475	69	0,12	1,01	1,03	0,016724	1,08E-04	9,60E-05	0,02	0,02828904443	-0,1699250014	FALSE	FALSE
BigCC100_15478	91	0,12	1,03	1,04	0,016668	8,00E-05	1,40E-04	0,01	0,01393919096	0,8073549221	FALSE	FALSE
BigCC100_15479	122	0,14	1	0,97	0,01676	-2,00E-05	-2,00E-05	-0,03	-0,04394334759	0	FALSE	FALSE
BigCC100_15481	93	0,14	0,99	0,99	0,0166	-4,80E-05	-1,60E-05	0	0	-1,584962501	FALSE	FALSE
BigCC100_15482	158	0,12	1,03	1,03	0,016756	-2,24E-04	-2,16E-04	0	0	-0,05246741989	FALSE	FALSE
BigCC100_15483	47	0,11	1,01	0,99	0,016672	9,60E-05	7,20E-05	-0,02	-0,02885486267	-0,4150374993	FALSE	FALSE
BigCC100_15486	33	0,11	1,01	1,01	0,0166	8,40E-05	1,00E-04	0	0	0,251538767	FALSE	FALSE
BigCC100_15488	157	0,13	1,01	1,04	0,01672	1,04E-04	-6,80E-05	0,03	0,04222823539	NA	FALSE	FALSE
BigCC100_15489	62	0,13	1,01	0,97	0,016728	1,60E-05	-3,60E-05	-0,04	-0,05829864056	NA	FALSE	FALSE
BigCC100_1549	177	0,13	1,01	1,04	0,016672	-1,12E-04	0	0,03	0,04222823539	-Inf	FALSE	FALSE
BigCC100_15490	38	0,11	1,01	1,01	0,016804	-2,68E-04	-2,04E-04	0	0	-0,3936638485	FALSE	FALSE
BigCC100_15491	59	0,12	1,01	1,03	0,016588	2,40E-04	2,36E-04	0,02	0,02828904443	-0,02424754625	FALSE	FALSE
BigCC100_15492	132	0,14	0,99	0,97	0,016476	2,80E-04	3,64E-04	-0,02	-0,02944377789	0,3785116233	FALSE	FALSE
BigCC100_15493	40	0,12	1	1,03	0,016548	2,72E-04	2,00E-04	0,03	0,04264433741	-0,4436066515	FALSE	FALSE
BigCC100_15494	55	0,13	1	0,99	0,016544	1,60E-04	5,60E-05	-0,01	-0,0144995697	-1,514573173	FALSE	FALSE
BigCC100_15495	61	0,12	1	1,02	0,016604	3,60E-05	6,00E-05	0,02	0,0285691522	0,7369655942	FALSE	FALSE
BigCC100_15496	115	0,12	1,02	0,98	0,01678	-3,60E-05	-2,60E-04	-0,04	-0,05771549786	2,852442812	FALSE	FALSE
BigCC100_15497	60	0,14	0,98	1,01	0,016688	6,40E-05	-8,40E-05	0,03	0,04350163864	NA	FALSE	FALSE
BigCC100_15498	50	0,13	0,99	0,99	0,016632	1,00E-04	1,92E-04	0	0	0,9411063109	FALSE	FALSE
BigCC100_15499	50	0,12	1	1,02	0,016648	1,00E-04	1,12E-04	0,02	0,0285691522	0,1634987323	FALSE	FALSE
BigCC100_155	4398	8,46	11,95	12,05	0,066532	0,07658	8,16E-04	0,1	0,01202252825	-6,552254698	FALSE	FALSE
BigCC100_15502	46	0,13	0,99	0,99	0,01672	-1,32E-04	-1,24E-04	0	0	-0,09019780897	FALSE	FALSE
BigCC100_15503	94	0,12	1	1,02	0,016792	-4,00E-06	-2,76E-04	0,02	0,0285691522	6,108524457	FALSE	FALSE
BigCC100_15504	36	0,12	1,02	0,99	0,016584	2,00E-05	-4,80E-05	-0,03	-0,04306872189	NA	FALSE	FALSE
BigCC100_15505	43	0,12	1	1,02	0,016568	2,56E-04	-3,60E-05	0,02	0,0285691522	NA	FALSE	FALSE
BigCC100_15506	45	0,13	0,99	0,99	0,016752	-3,60E-05	8,80E-05	0	0	NA	FALSE	FALSE
BigCC100_15507	39	0,14	0,98	1	0,016792	-2,80E-05	1,20E-05	0,02	0,02914634566	NA	FALSE	FALSE
BigCC100_15508	54	0,12	1	0,99	0,016832	-8,80E-05	-9,60E-05	-0,01	-0,0144995697	0,1255308821	FALSE	FALSE
BigCC100_1551	101	0,12	1	1,03	0,016784	-3,20E-05	-2,64E-04	0,03	0,04264433741	3,044394119	FALSE	FALSE
BigCC100_15510	50	0,12	1,01	1	0,016812	-2,96E-04	2,40E-05	-0,01	-0,01435529298	NA	FALSE	FALSE
BigCC100_15511	57	0,12	1	1,02	0,016736	-1,52E-04	9,20E-05	0,02	0,0285691522	NA	FALSE	FALSE
BigCC100_15512	44	0,12	1,01	0,98	0,016828	-3,20E-04	-2,28E-04	-0,03	-0,04350163864	-0,4890380807	FALSE	FALSE
BigCC100_15513	39	0,11	1,02	1,04	0,016744	1,60E-05	-1,84E-04	0,02	0,02801437617	NA	FALSE	FALSE
BigCC100_15514	89	0,14	1	0,99	0,0167	3,60E-05	1,28E-04	-0,01	-0,0144995697	1,830074999	FALSE	FALSE
BigCC100_15515	68	0,12	1	1,02	0,016496	4,40E-05	1,92E-04	0,02	0,0285691522	2,125530882	FALSE	FALSE
BigCC100_15516	66	0,14	1	0,96	0,016832	-2,92E-04	-2,84E-04	-0,04	-0,05889368905	-0,04007743938	FALSE	FALSE
BigCC100_15519	68	0,14	0,99	0,99	0,016564	-1,60E-05	2,80E-05	0	0	NA	FALSE	FALSE
BigCC100_1552	35	0,12	1	1,01	0,016812	-8,00E-05	-2,68E-04	0,01	0,01435529298	1,744161096	FALSE	FALSE
BigCC100_15523	39	0,12	1	0,98	0,016788	-2,04E-04	-1,72E-04	-0,02	-0,02914634566	-0,2461605873	FALSE	FALSE
BigCC100_15524	34	0,12	1	1,03	0,016524	3,00E-04	9,60E-05	0,03	0,04264433741	-1,64385619	FALSE	FALSE
BigCC100_15525	75	0,12	1	1	0,016764	6,00E-05	-2,00E-04	0	0	NA	FALSE	FALSE
BigCC100_15526	118	0,13	1,01	1,03	0,016748	-1,28E-04	1,60E-05	0,02	0,02828904443	NA	FALSE	FALSE
BigCC100_15529	44	0,12	1,01	1	0,016516	2,80E-05	7,60E-05	-0,01	-0,01435529298	1,440572591	FALSE	FALSE
BigCC100_1553	46	0,12	1,01	1,02	0,016712	-1,72E-04	-8,80E-05	0,01	0,01421385922	-0,9668331361	FALSE	FALSE
BigCC100_15530	31	0,12	1	0,99	0,016544	1,20E-05	-4,00E-06	-0,01	-0,0144995697	NA	FALSE	FALSE
BigCC100_15532	36	0,11	1,01	1,01	0,016604	-2,80E-05	6,40E-05	0	0	NA	FALSE	FALSE
BigCC100_15534	37	0,11	1,01	1,03	0,016848	-2,00E-05	-2,04E-04	0,02	0,02828904443	3,350497247	FALSE	FALSE
BigCC100_15536	38	0,12	1,01	1,02	0,016828	-2,24E-04	-6,80E-05	0,01	0,01421385922	-1,719892081	FALSE	FALSE
BigCC100_15537	58	0,12	1,02	1	0,016592	-6,00E-05	8,00E-06	-0,02	-0,0285691522	NA	FALSE	FALSE
BigCC100_15538	40	0,14	0,98	1	0,01668	-1,36E-04	4,00E-06	0,02	0,02914634566	NA	FALSE	FALSE
BigCC100_15541	35	0,12	1	0,98	0,016836	-3,20E-04	-3,12E-04	-0,02	-0,02914634566	-0,03652587603	FALSE	FALSE
BigCC100_15543	170	0,15	0,97	0,97	0,016568	2,64E-04	1,80E-04	0	0	-0,552541023	FALSE	FALSE
BigCC100_15544	57	0,13	1,01	1,02	0,016824	-8,40E-05	-2,80E-04	0,01	0,01421385922	1,736965594	FALSE	FALSE
BigCC100_15545	33	0,12	1	0,98	0,0166	-1,00E-04	6,40E-05	-0,02	-0,02914634566	NA	FALSE	FALSE
BigCC100_15546	146	0,12	1,01	1,03	0,016728	1,00E-04	-1,96E-04	0,02	0,02828904443	NA	FALSE	FALSE
BigCC100_15547	65	0,12	1,01	1	0,016752	-7,60E-05	5,20E-05	-0,01	-0,01435529298	NA	FALSE	FALSE
BigCC100_15548	87	0,13	0,99	1,01	0,016612	4,40E-05	-6,40E-05	0,02	0,02885486267	NA	FALSE	FALSE
BigCC100_1555	41	0,12	1,01	1,02	0,016592	1,20E-05	2,32E-04	0,01	0,01421385922	4,273018494	FALSE	FALSE
BigCC100_15553	31	0,12	1,01	1,02	0,01656	2,68E-04	-1,20E-05	0,01	0,01421385922	NA	FALSE	FALSE
BigCC100_15556	33	0,12	1	1,02	0,016804	-2,20E-04	-3,20E-05	0,02	0,0285691522	-2,781359714	FALSE	FALSE
BigCC100_15558	32	0,12	1,01	1,02	0,016524	2,88E-04	5,60E-05	0,01	0,01421385922	-2,362570079	FALSE	FALSE
BigCC100_15561	31	0,12	1	1	0,016616	2,08E-04	-7,20E-05	0	0	NA	FALSE	FALSE
BigCC100_15562	35	0,11	1,01	1,03	0,01656	2,68E-04	9,60E-05	0,02	0,02828904443	-1,48112669	FALSE	FALSE
BigCC100_15564	31	0,12	1,01	1,02	0,016752	-2,16E-04	1,60E-05	0,01	0,01421385922	NA	FALSE	FALSE
BigCC100_15565	53	0,12	1,02	1	0,016664	1,76E-04	-7,20E-05	-0,02	-0,0285691522	NA	FALSE	FALSE
BigCC100_15566	45	0,12	1,02	1,01	0,016544	1,00E-04	4,40E-05	-0,01	-0,01421385922	-1,184424571	FALSE	FALSE
BigCC100_15568	38	0,12	1,01	1,03	0,016568	2,80E-04	1,88E-04	0,02	0,02828904443	-0,5746941653	FALSE	FALSE
BigCC100_15570	38	0,12	1	1	0,016548	5,60E-05	3,04E-04	0	0	2,440572591	FALSE	FALSE
BigCC100_15571	41	0,12	1	1,02	0,01666	2,00E-05	-1,16E-04	0,02	0,0285691522	NA	FALSE	FALSE
BigCC100_15572	50	0,12	1,01	0,99	0,016736	9,60E-05	2,80E-05	-0,02	-0,02885486267	-1,777607579	FALSE	FALSE
BigCC100_15573	50	0,11	1,01	1,04	0,016716	-1,88E-04	-1,84E-04	0,03	0,04222823539	-0,03102689562	FALSE	FALSE
BigCC100_15574	38	0,14	0,98	0,98	0,01664	7,60E-05	-5,20E-05	0	0	NA	FALSE	FALSE
BigCC100_15575	33	0,13	0,99	1,01	0,01654	2,60E-04	3,08E-04	0,02	0,02885486267	0,2444187277	FALSE	FALSE
BigCC100_15576	33	0,12	1	0,98	0,016572	2,84E-04	4,40E-05	-0,02	-0,02914634566	-2,690315501	FALSE	FALSE
BigCC100_15578	34	0,11	1,01	1,01	0,016852	-1,48E-04	-4,80E-05	0	0	-1,624490865	FALSE	FALSE
BigCC100_15579	36	0,12	1,02	1,02	0,016548	0	2,72E-04	0	0	Inf	FALSE	FALSE
BigCC100_1558	205	0,12	1,02	1	0,01684	-1,80E-04	-1,48E-04	-0,02	-0,0285691522	-0,2823997307	FALSE	FALSE
BigCC100_15580	44	0,12	1	1,02	0,016836	-8,00E-06	-3,00E-04	0,02	0,0285691522	5,22881869	FALSE	FALSE
BigCC100_15581	136	0,12	1	1	0,01646	3,32E-04	1,56E-04	0	0	-1,089637212	FALSE	FALSE
BigCC100_15582	32	0,12	1	1,02	0,016512	5,20E-05	3,28E-04	0,02	0,0285691522	2,657112286	FALSE	FALSE
BigCC100_15585	38	0,14	0,99	1	0,016772	-2,44E-04	-1,20E-04	0,01	0,0144995697	-1,023846742	FALSE	FALSE
BigCC100_15587	31	0,14	0,98	0,98	0,016696	-8,00E-05	-1,80E-04	0	0	1,169925001	FALSE	FALSE
BigCC100_15588	32	0,12	1	1,02	0,0166	1,12E-04	2,08E-04	0,02	0,0285691522	0,8930847961	FALSE	FALSE
BigCC100_15589	36	0,12	1	0,98	0,016704	-1,28E-04	-1,24E-04	-0,02	-0,02914634566	-0,04580368961	FALSE	FALSE
BigCC100_15591	42	0,14	0,98	1	0,016688	-4,80E-05	1,40E-04	0,02	0,02914634566	NA	FALSE	FALSE
BigCC100_15593	33	0,12	1	1,03	0,01662	2,00E-04	2,28E-04	0,03	0,04264433741	0,1890338244	FALSE	FALSE
BigCC100_15594	36	0,13	0,99	0,99	0,01654	2,84E-04	3,00E-04	0	0	0,07907157099	FALSE	FALSE
BigCC100_15595	136	0,12	1,02	1,02	0,016804	-1,92E-04	-2,04E-04	0	0	0,08746284125	FALSE	FALSE
BigCC100_15598	39	0,14	0,99	0,97	0,016528	4,00E-06	6,00E-05	-0,02	-0,02944377789	3,906890596	FALSE	FALSE
BigCC100_15599	45	0,13	0,99	1,01	0,016536	1,60E-04	3,04E-04	0,02	0,02885486267	0,9259994186	FALSE	FALSE
BigCC100_156	2100	2,4	2,67	5,67	0,02394	0,019876	3,88E-04	3	1,086508993	-5,678826984	FALSE	FALSE
BigCC100_15600	31	0,14	1	0,97	0,016736	-2,00E-04	-1,96E-04	-0,03	-0,04394334759	-0,02914634566	FALSE	FALSE
BigCC100_15601	63	0,12	1	1,02	0,016808	4,40E-05	-1,96E-04	0,02	0,0285691522	NA	FALSE	FALSE
BigCC100_15602	32	0,14	1	0,98	0,016632	4,40E-05	1,96E-04	-0,02	-0,02914634566	2,155278225	FALSE	FALSE
BigCC100_15603	35	0,11	1,03	1,03	0,0166	-8,00E-06	2,32E-04	0	0	NA	FALSE	FALSE
BigCC100_15604	31	0,12	1	1	0,01674	6,80E-05	-1,92E-04	0	0	NA	FALSE	FALSE
BigCC100_15605	32	0,11	1,03	1,03	0,016592	2,32E-04	2,56E-04	0	0	0,1420190049	FALSE	FALSE
BigCC100_15606	48	0,12	1	1	0,01656	-1,20E-05	2,80E-05	0	0	NA	FALSE	FALSE
BigCC100_15607	46	0,12	1	1,02	0,016548	-1,20E-05	2,80E-04	0,02	0,0285691522	NA	FALSE	FALSE
BigCC100_15609	33	0,13	0,99	1,01	0,016764	7,20E-05	-8,40E-05	0,02	0,02885486267	NA	FALSE	FALSE
BigCC100_15610	36	0,13	0,99	0,99	0,016664	-7,20E-05	1,60E-04	0	0	NA	FALSE	FALSE
BigCC100_15611	53	0,13	0,99	1,01	0,016712	-5,60E-05	-1,68E-04	0,02	0,02885486267	1,584962501	FALSE	FALSE
BigCC100_15613	33	0,11	1,02	0,99	0,016612	2,20E-04	2,44E-04	-0,03	-0,04306872189	0,149377624	FALSE	FALSE
BigCC100_15614	34	0,12	1	1,02	0,016608	2,04E-04	2,20E-04	0,02	0,0285691522	0,1089343716	FALSE	FALSE
BigCC100_15615	76	0,12	1	1	0,01652	8,80E-05	3,12E-04	0	0	1,8259706	FALSE	FALSE
BigCC100_15617	43	0,13	1,01	0,97	0,016708	-1,56E-04	1,44E-04	-0,04	-0,05829864056	NA	FALSE	FALSE
BigCC100_15620	64	0,11	1,01	1,03	0,016592	5,20E-05	2,20E-04	0,02	0,02828904443	2,080919995	FALSE	FALSE
BigCC100_15621	53	0,12	1	0,99	0,016856	-3,00E-04	-3,32E-04	-0,01	-0,0144995697	0,1462207409	FALSE	FALSE
BigCC100_15625	31	0,12	1	0,98	0,016528	3,20E-04	2,80E-04	-0,02	-0,02914634566	-0,1926450779	FALSE	FALSE
BigCC100_15627	38	0,12	1,01	1	0,016516	6,80E-05	3,04E-04	-0,01	-0,01435529298	2,160464672	FALSE	FALSE
BigCC100_15628	67	0,14	0,99	0,99	0,01654	3,04E-04	8,00E-06	0	0	-5,247927513	FALSE	FALSE
BigCC100_15629	34	0,11	1,03	0,99	0,016852	-3,20E-04	-3,16E-04	-0,04	-0,0571439071	-0,01814734671	FALSE	FALSE
BigCC100_15630	44	0,14	0,98	1	0,016544	8,00E-05	2,68E-04	0,02	0,02914634566	1,744161096	FALSE	FALSE
BigCC100_15631	64	0,12	1,02	1	0,016688	1,68E-04	-1,24E-04	-0,02	-0,0285691522	NA	FALSE	FALSE
BigCC100_15634	32	0,12	1	0,98	0,016764	-4,00E-06	-9,60E-05	-0,02	-0,02914634566	4,584962501	FALSE	FALSE
BigCC100_15638	33	0,14	1	1	0,016812	-2,36E-04	1,60E-05	0	0	NA	FALSE	FALSE
BigCC100_15639	33	0,12	1	0,99	0,016572	2,40E-04	4,00E-05	-0,01	-0,0144995697	-2,584962501	FALSE	FALSE
BigCC100_1564	63	0,13	0,99	1,02	0,01668	8,00E-06	-6,80E-05	0,03	0,04306872189	NA	FALSE	FALSE
BigCC100_15641	41	0,13	1,01	1,01	0,01662	1,92E-04	-7,60E-05	0	0	NA	FALSE	FALSE
BigCC100_15644	32	0,11	1,03	1,04	0,016528	1,32E-04	1,60E-05	0,01	0,01393919096	-3,044394119	FALSE	FALSE
BigCC100_15645	33	0,11	1,03	1,01	0,016712	1,20E-04	-1,16E-04	-0,02	-0,02828904443	NA	FALSE	FALSE
BigCC100_15646	34	0,13	0,99	1,01	0,016812	-3,04E-04	2,00E-05	0,02	0,02885486267	NA	FALSE	FALSE
BigCC100_15648	36	0,13	1	1,02	0,016644	-1,16E-04	1,68E-04	0,02	0,0285691522	NA	FALSE	FALSE
BigCC100_15652	31	0,13	1,01	0,97	0,016516	-1,20E-05	4,00E-06	-0,04	-0,05829864056	NA	FALSE	FALSE
BigCC100_15653	33	0,14	0,98	1	0,016792	5,20E-05	-2,08E-04	0,02	0,02914634566	NA	FALSE	FALSE
BigCC100_15655	31	0,13	0,99	1	0,016592	8,00E-05	1,44E-04	0,01	0,0144995697	0,8479969066	FALSE	FALSE
BigCC100_15656	33	0,12	1	0,98	0,016828	3,20E-05	-2,36E-04	-0,02	-0,02914634566	NA	FALSE	FALSE
BigCC100_15657	92	0,13	1,01	1,01	0,016536	2,80E-05	2,76E-04	0	0	3,301169535	FALSE	FALSE
BigCC100_15659	60	0,13	1	1,01	0,01656	-1,20E-05	3,20E-05	0,01	0,01435529298	NA	FALSE	FALSE
BigCC100_15660	40	0,12	1	0,98	0,016516	7,20E-05	7,60E-05	-0,02	-0,02914634566	0,078002512	FALSE	FALSE
BigCC100_15661	45	0,13	0,99	1,02	0,016844	1,20E-05	-2,40E-04	0,03	0,04306872189	NA	FALSE	FALSE
BigCC100_15662	32	0,13	0,99	0,99	0,016556	1,16E-04	1,24E-04	0	0	0,09621531526	FALSE	FALSE
BigCC100_15663	47	0,12	1	1,02	0,016596	-8,00E-05	-7,60E-05	0,02	0,0285691522	-0,07400058144	FALSE	FALSE
BigCC100_15668	46	0,13	0,99	1,01	0,016516	0	9,20E-05	0,02	0,02885486267	Inf	FALSE	FALSE
BigCC100_15669	54	0,13	0,99	0,97	0,01656	0	2,12E-04	-0,02	-0,02944377789	Inf	FALSE	FALSE
BigCC100_15671	34	0,12	1	1	0,016544	2,12E-04	8,00E-06	0	0	-4,727920455	FALSE	FALSE
BigCC100_15674	51	0,13	1,01	1,01	0,016552	4,00E-05	2,60E-04	0	0	2,700439718	FALSE	FALSE
BigCC100_15675	99	0,11	1,01	1,01	0,0165	1,56E-04	2,60E-04	0	0	0,7369655942	FALSE	FALSE
BigCC100_15679	34	0,11	1,01	1,03	0,016736	6,40E-05	-1,88E-04	0,02	0,02828904443	NA	FALSE	FALSE
BigCC100_15680	32	0,11	1,01	1,01	0,016848	-3,64E-04	-2,64E-04	0	0	-0,4634005208	FALSE	FALSE
BigCC100_15681	33	0,12	1,01	1,02	0,016768	-2,08E-04	-2,20E-04	0,01	0,01421385922	0,08091999538	FALSE	FALSE
BigCC100_15682	36	0,13	0,99	0,97	0,016668	-1,32E-04	8,00E-05	-0,02	-0,02944377789	NA	FALSE	FALSE
BigCC100_15683	35	0,13	0,99	1,01	0,016764	-1,84E-04	6,80E-05	0,02	0,02885486267	NA	FALSE	FALSE
BigCC100_15685	35	0,14	0,99	0,98	0,016832	-4,00E-05	-2,20E-04	-0,01	-0,01464677596	2,459431619	FALSE	FALSE
BigCC100_15687	33	0,13	1	0,97	0,016756	-2,16E-04	-2,20E-04	-0,03	-0,04394334759	0,02647221136	FALSE	FALSE
BigCC100_15689	38	0,12	1,02	1	0,016804	-6,00E-05	-2,76E-04	-0,02	-0,0285691522	2,201633861	FALSE	FALSE
BigCC100_15691	33	0,12	1	1,05	0,016552	1,08E-04	1,20E-05	0,05	0,07038932789	-3,169925001	FALSE	FALSE
BigCC100_15692	33	0,11	1,01	1,03	0,016752	-2,08E-04	-2,32E-04	0,02	0,02828904443	0,157541277	FALSE	FALSE
BigCC100_15693	31	0,12	1	1,01	0,016844	-3,24E-04	-2,92E-04	0,01	0,01435529298	-0,150025444	FALSE	FALSE
BigCC100_15697	57	0,13	0,99	1	0,016584	1,68E-04	2,36E-04	0,01	0,0144995697	0,4903256266	FALSE	FALSE
BigCC100_15698	37	0,12	1,02	1	0,016648	2,08E-04	-1,20E-04	-0,02	-0,0285691522	NA	FALSE	FALSE
BigCC100_15699	35	0,11	1,02	1,01	0,0167	6,00E-05	-1,16E-04	-0,01	-0,01421385922	NA	FALSE	FALSE
BigCC100_157	1826	4,15	4,96	24,51	0,033812	0,015704	3,60E-04	19,55	2,304958458	-5,446991361	FALSE	FALSE
BigCC100_15701	32	0,11	1,01	1,01	0,01652	7,20E-05	2,92E-04	0	0	2,019899557	FALSE	FALSE
BigCC100_15702	33	0,13	0,99	1,01	0,016644	1,88E-04	-1,20E-04	0,02	0,02885486267	NA	FALSE	FALSE
BigCC100_15703	51	0,11	1,01	1,01	0,016576	1,80E-04	1,00E-04	0	0	-0,8479969066	FALSE	FALSE
BigCC100_15704	79	0,14	0,98	0,99	0,01682	-1,60E-05	-6,00E-05	0,01	0,01464677596	1,906890596	FALSE	FALSE
BigCC100_15706	38	0,13	0,99	1,01	0,016616	4,80E-05	-6,80E-05	0,02	0,02885486267	NA	FALSE	FALSE
BigCC100_15708	44	0,12	1	1	0,016812	-6,00E-05	-2,44E-04	0	0	2,023846742	FALSE	FALSE
BigCC100_15711	37	0,12	1	1,02	0,016672	1,60E-04	-1,60E-04	0,02	0,0285691522	NA	FALSE	FALSE
BigCC100_15714	64	0,12	1	1	0,016832	-3,12E-04	-9,60E-05	0	0	-1,700439718	FALSE	FALSE
BigCC100_15715	44	0,12	1,02	1,03	0,016612	1,40E-04	1,36E-04	0,01	0,01407518521	-0,04182017569	FALSE	FALSE
BigCC100_15719	47	0,11	1,02	1,01	0,01656	2,52E-04	2,00E-05	-0,01	-0,01421385922	-3,655351829	FALSE	FALSE
BigCC100_15723	35	0,12	1,02	1,02	0,016808	3,60E-05	-1,20E-04	0	0	NA	FALSE	FALSE
BigCC100_15727	32	0,11	1,01	1,03	0,016744	1,60E-05	2,00E-05	0,02	0,02828904443	0,3219280949	FALSE	FALSE
BigCC100_15728	33	0,13	1	0,99	0,016624	1,48E-04	-4,00E-05	-0,01	-0,0144995697	NA	FALSE	FALSE
BigCC100_15729	36	0,13	0,99	0,99	0,01674	-2,48E-04	-6,00E-05	0	0	-2,047305715	FALSE	FALSE
BigCC100_15730	32	0,12	1	1	0,016608	4,00E-06	2,40E-05	0	0	2,584962501	FALSE	FALSE
BigCC100_15733	33	0,12	1	1	0,016588	2,68E-04	3,60E-05	0	0	-2,896164189	FALSE	FALSE
BigCC100_15734	34	0,12	1	1	0,016552	3,00E-04	-1,60E-05	0	0	NA	FALSE	FALSE
BigCC100_15736	73	0,12	1	1,03	0,0165	8,80E-05	3,24E-04	0,03	0,04264433741	1,880418384	FALSE	FALSE
BigCC100_15737	32	0,11	1,01	1,01	0,016564	2,04E-04	2,56E-04	0	0	0,327574658	FALSE	FALSE
BigCC100_15739	46	0,12	1	1	0,016812	1,60E-05	-1,56E-04	0	0	NA	FALSE	FALSE
BigCC100_15740	31	0,12	1	1,02	0,01652	4,40E-05	2,32E-04	0,02	0,0285691522	2,398549376	FALSE	FALSE
BigCC100_15741	33	0,12	1,02	1	0,016556	2,68E-04	-8,00E-06	-0,02	-0,0285691522	NA	FALSE	FALSE
BigCC100_15747	45	0,12	1	1	0,016852	-1,92E-04	-1,04E-04	0	0	-0,8845227826	FALSE	FALSE
BigCC100_15748	80	0,12	1	1	0,016592	2,08E-04	2,12E-04	0	0	0,02748073642	FALSE	FALSE
BigCC100_15749	45	0,12	0,99	1,02	0,016692	1,04E-04	5,20E-05	0,03	0,04306872189	-1	FALSE	FALSE
BigCC100_15751	53	0,12	1	1	0,016496	3,36E-04	2,48E-04	0	0	-0,4381211124	FALSE	FALSE
BigCC100_15753	32	0,12	1	1	0,016808	-8,00E-06	-2,96E-04	0	0	5,209453366	FALSE	FALSE
BigCC100_15754	59	0,11	1,01	1,03	0,016524	1,84E-04	1,44E-04	0,02	0,02828904443	-0,3536369546	FALSE	FALSE
BigCC100_1576	50	0,12	1	1,02	0,01682	-3,24E-04	-2,36E-04	0,02	0,0285691522	-0,4572069535	FALSE	FALSE
BigCC100_15762	42	0,12	1	1	0,016844	1,20E-05	-8,80E-05	0	0	NA	FALSE	FALSE
BigCC100_15763	35	0,13	0,99	0,99	0,016748	6,40E-05	-1,12E-04	0	0	NA	FALSE	FALSE
BigCC100_15765	33	0,12	1	1	0,016832	-3,00E-04	8,00E-06	0	0	NA	FALSE	FALSE
BigCC100_15766	33	0,12	1,02	1	0,016672	1,64E-04	-8,80E-05	-0,02	-0,0285691522	NA	FALSE	FALSE
BigCC100_15768	46	0,11	1	1,03	0,016564	1,92E-04	-4,00E-05	0,03	0,04264433741	NA	FALSE	FALSE
BigCC100_15769	33	0,12	1	1	0,016684	1,16E-04	7,20E-05	0	0	-0,6880559937	FALSE	FALSE
BigCC100_15772	32	0,13	0,99	1,01	0,01674	-1,64E-04	9,60E-05	0,02	0,02885486267	NA	FALSE	FALSE
BigCC100_15776	37	0,14	0,98	1	0,016808	1,20E-05	-2,20E-04	0,02	0,02914634566	NA	FALSE	FALSE
BigCC100_15777	34	0,11	1,01	1,01	0,016828	-7,60E-05	-2,72E-04	0	0	1,839535328	FALSE	FALSE
BigCC100_15779	37	0,12	1,01	1	0,016568	4,00E-05	2,40E-04	-0,01	-0,01435529298	2,584962501	FALSE	FALSE
BigCC100_1578	75	0,12	1,01	1,03	0,016496	3,40E-04	2,52E-04	0,02	0,02828904443	-0,4321110126	FALSE	FALSE
BigCC100_15783	44	0,12	1,01	1	0,016544	1,24E-04	2,84E-04	-0,01	-0,01435529298	1,195550809	FALSE	FALSE
BigCC100_15784	40	0,12	1	1,02	0,016828	-3,04E-04	-2,76E-04	0,02	0,0285691522	-0,1394030567	FALSE	FALSE
BigCC100_1579	314	0,19	1,03	1,03	0,016744	-1,40E-04	-7,20E-05	0	0	-0,9593580155	FALSE	FALSE
BigCC100_15793	38	0,13	1	0,99	0,016556	-3,60E-05	9,60E-05	-0,01	-0,0144995697	NA	FALSE	FALSE
BigCC100_15794	32	0,14	0,98	1	0,016804	-8,00E-06	-1,40E-04	0,02	0,02914634566	4,129283017	FALSE	FALSE
BigCC100_158	524	0,29	1,19	3,13	0,016564	1,72E-04	2,56E-04	1,94	1,395201084	0,5737352453	FALSE	FALSE
BigCC100_15805	37	0,12	1	1	0,016596	2,32E-04	1,64E-04	0	0	-0,5004289905	FALSE	FALSE
BigCC100_15807	73	0,12	1	1	0,016536	9,60E-05	-2,80E-05	0	0	NA	FALSE	FALSE
BigCC100_15816	38	0,14	0,98	0,98	0,016796	-9,20E-05	-2,64E-04	0	0	1,520832163	FALSE	FALSE
BigCC100_15821	72	0,13	0,99	0,99	0,016624	2,20E-04	-1,20E-05	0	0	NA	FALSE	FALSE
BigCC100_1583	72	0,13	1,01	0,99	0,016744	-2,04E-04	-9,20E-05	-0,02	-0,02885486267	-1,148863386	FALSE	FALSE
BigCC100_15839	45	0,12	1,01	1,01	0,0166	2,28E-04	1,16E-04	0	0	-0,974909019	FALSE	FALSE
BigCC100_1584	49	0,12	1	1,02	0,016508	2,00E-04	3,60E-05	0,02	0,0285691522	-2,473931188	FALSE	FALSE
BigCC100_15842	33	0,14	0,99	0,98	0,016624	1,88E-04	1,88E-04	-0,01	-0,01464677596	0	FALSE	FALSE
BigCC100_15847	37	0,11	1,01	1,01	0,016832	-3,92E-04	-3,24E-04	0	0	-0,2748598412	FALSE	FALSE
BigCC100_15853	58	0,12	1,02	1	0,016828	-1,32E-04	-2,88E-04	-0,02	-0,0285691522	1,125530882	FALSE	FALSE
BigCC100_15865	37	0,12	1	1,02	0,01672	-1,72E-04	-4,80E-05	0,02	0,0285691522	-1,841302254	FALSE	FALSE
BigCC100_1587	82	0,12	1,02	1	0,016796	2,00E-05	-4,00E-05	-0,02	-0,0285691522	NA	FALSE	FALSE
BigCC100_15878	36	0,11	1,01	1,01	0,01682	-2,40E-04	-2,92E-04	0	0	0,2829339633	FALSE	FALSE
BigCC100_15880	42	0,12	0,99	1,02	0,01674	-1,88E-04	3,20E-05	0,03	0,04306872189	NA	FALSE	FALSE
BigCC100_15884	32	0,12	1,02	1	0,016628	1,80E-04	1,00E-04	-0,02	-0,0285691522	-0,8479969066	FALSE	FALSE
BigCC100_1589	58	0,12	1	1	0,016584	-5,60E-05	-2,00E-05	0	0	-1,485426827	FALSE	FALSE
BigCC100_15896	43	0,12	1	1,02	0,0168	4,40E-05	-2,56E-04	0,02	0,0285691522	NA	FALSE	FALSE
BigCC100_159	1162	0,8	1,51	1,51	0,016708	6,08E-04	-1,20E-04	0	0	NA	FALSE	FALSE
BigCC100_1591	248	0,12	1,01	1,01	0,016536	2,20E-04	2,84E-04	0	0	0,368387406	FALSE	FALSE
BigCC100_15912	31	0,13	0,99	1,01	0,01662	2,28E-04	-8,00E-06	0,02	0,02885486267	NA	FALSE	FALSE
BigCC100_15915	40	0,11	1,01	1,01	0,016524	3,36E-04	4,00E-06	0	0	-6,392317423	FALSE	FALSE
BigCC100_15917	33	0,12	1,02	1	0,016784	-3,20E-05	3,60E-05	-0,02	-0,0285691522	NA	FALSE	FALSE
BigCC100_15920	70	0,11	1,01	1,03	0,01672	-1,28E-04	1,12E-04	0,02	0,02828904443	NA	FALSE	FALSE
BigCC100_15983	41	0,12	1	1,02	0,016604	6,40E-05	2,40E-04	0,02	0,0285691522	1,906890596	FALSE	FALSE
BigCC100_1599	34	0,13	1	0,99	0,016536	2,68E-04	1,32E-04	-0,01	-0,0144995697	-1,021695071	FALSE	FALSE
BigCC100_15998	42	0,11	1,02	1,01	0,016592	1,56E-04	-6,80E-05	-0,01	-0,01421385922	NA	FALSE	FALSE
BigCC100_16	1776	2,76	2,94	12,98	0,027664	0,015084	3,48E-04	10,04	2,142402323	-5,437787939	FALSE	FALSE
BigCC100_160	1214	1,58	2,09	4,06	0,018464	0,006428	2,88E-04	1,97	0,9579767851	-4,480229212	FALSE	FALSE
BigCC100_16002	82	0,12	1,01	1,02	0,01656	1,52E-04	2,80E-04	0,01	0,01421385922	0,8813555035	FALSE	FALSE
BigCC100_16035	37	0,11	1,02	1,02	0,0166	-2,00E-05	-1,60E-05	0	0	-0,3219280949	FALSE	FALSE
BigCC100_1605	128	0,12	1,03	1,03	0,016792	-5,60E-05	-4,00E-05	0	0	-0,4854268272	FALSE	FALSE
BigCC100_16054	64	0,14	1	1	0,01666	8,00E-05	-7,60E-05	0	0	NA	FALSE	FALSE
BigCC100_16067	44	0,12	1	1	0,016648	-5,20E-05	-1,24E-04	0	0	1,253756592	FALSE	FALSE
BigCC100_1607	69	0,13	1,01	0,99	0,016756	-1,40E-04	-1,52E-04	-0,02	-0,02885486267	0,1186444965	FALSE	FALSE
BigCC100_16077	52	0,12	1	1	0,016556	2,44E-04	6,80E-05	0	0	-1,843274496	FALSE	FALSE
BigCC100_16079	70	0,12	1	1,03	0,016656	1,00E-04	9,20E-05	0,03	0,04264433741	-0,1202942337	FALSE	FALSE
BigCC100_16084	45	0,12	1	1	0,016756	8,00E-05	-2,24E-04	0	0	NA	FALSE	FALSE
BigCC100_1609	47	0,14	1	0,98	0,016816	2,80E-05	-7,20E-05	-0,02	-0,02914634566	NA	FALSE	FALSE
BigCC100_16098	58	0,13	0,99	1,02	0,016772	-2,36E-04	-8,00E-05	0,03	0,04306872189	-1,560714954	FALSE	FALSE
BigCC100_16099	66	0,12	1,02	1	0,016556	6,40E-05	1,04E-04	-0,02	-0,0285691522	0,7004397181	FALSE	FALSE
BigCC100_161	698	0,4	1,21	11,2	0,016604	1,84E-04	1,56E-04	9,99	3,21041978	-0,2381597372	FALSE	FALSE
BigCC100_1610	275	0,15	1,01	1	0,01652	2,92E-04	2,64E-04	-0,01	-0,01435529298	-0,1454304395	FALSE	FALSE
BigCC100_16100	32	0,12	1	1,02	0,016712	5,60E-05	2,80E-05	0,02	0,0285691522	-1	FALSE	FALSE
BigCC100_16101	58	0,11	1,01	1,01	0,016812	1,60E-05	1,20E-05	0	0	-0,4150374993	FALSE	FALSE
BigCC100_16104	32	0,12	1	1,01	0,016524	2,40E-05	2,28E-04	0,01	0,01435529298	3,247927513	FALSE	FALSE
BigCC100_16105	43	0,12	1	1,02	0,016676	1,68E-04	-1,56E-04	0,02	0,0285691522	NA	FALSE	FALSE
BigCC100_16106	36	0,12	1,01	1,02	0,016508	1,20E-05	1,84E-04	0,01	0,01421385922	3,938599455	FALSE	FALSE
BigCC100_16125	41	0,14	0,98	0,98	0,016824	-3,04E-04	-1,48E-04	0	0	-1,038474148	FALSE	FALSE
BigCC100_16126	36	0,11	1,01	1,01	0,016852	-1,20E-05	-1,96E-04	0	0	4,029747343	FALSE	FALSE
BigCC100_16127	51	0,13	1,01	1,01	0,016668	-1,28E-04	9,20E-05	0	0	NA	FALSE	FALSE
BigCC100_16129	32	0,11	1,03	1,01	0,016812	-2,40E-04	-2,04E-04	-0,02	-0,02828904443	-0,2344652536	FALSE	FALSE
BigCC100_16131	38	0,12	1,01	1	0,016564	2,60E-04	-4,40E-05	-0,01	-0,01435529298	NA	FALSE	FALSE
BigCC100_16132	159	0,13	1	1,02	0,016552	3,20E-05	6,40E-05	0,02	0,0285691522	1	FALSE	FALSE
BigCC100_16133	50	0,13	0,99	0,99	0,0168	6,00E-05	-1,56E-04	0	0	NA	FALSE	FALSE
BigCC100_16134	66	0,12	1	1	0,016548	-2,80E-05	3,20E-05	0	0	NA	FALSE	FALSE
BigCC100_16135	48	0,13	0,99	1,01	0,016712	-5,20E-05	-5,20E-05	0,02	0,02885486267	0	FALSE	FALSE
BigCC100_16136	85	0,13	1,01	1,02	0,016584	-4,00E-05	2,68E-04	0,01	0,01421385922	NA	FALSE	FALSE
BigCC100_16137	48	0,12	1	1	0,016624	2,80E-05	0	0	0	-Inf	FALSE	FALSE
BigCC100_16138	35	0,12	1	1	0,016768	-8,00E-05	-1,88E-04	0	0	1,232660757	FALSE	FALSE
BigCC100_16139	53	0,11	1,01	1,01	0,016552	2,72E-04	4,80E-05	0	0	-2,502500341	FALSE	FALSE
BigCC100_16143	34	0,12	1	1,03	0,016556	3,04E-04	1,00E-04	0,03	0,04264433741	-1,604071324	FALSE	FALSE
BigCC100_16144	31	0,14	1	0,98	0,01662	1,40E-04	1,84E-04	-0,02	-0,02914634566	0,3942789391	FALSE	FALSE
BigCC100_1615	256	0,14	1,01	1,01	0,016552	-3,60E-05	-4,00E-05	0	0	0,1520030934	FALSE	FALSE
BigCC100_16156	41	0,13	1	1	0,016808	-2,40E-04	-1,72E-04	0	0	-0,4806258409	FALSE	FALSE
BigCC100_16157	32	0,12	1,02	1,02	0,016764	-2,40E-04	5,60E-05	0	0	NA	FALSE	FALSE
BigCC100_16158	44	0,11	1,01	1,01	0,01682	-2,28E-04	2,40E-05	0	0	NA	FALSE	FALSE
BigCC100_16159	112	0,12	1,03	1,01	0,016748	-2,28E-04	5,60E-05	-0,02	-0,02828904443	NA	FALSE	FALSE
BigCC100_16162	51	0,12	1	1,02	0,016816	-2,76E-04	-2,40E-04	0,02	0,0285691522	-0,2016338612	FALSE	FALSE
BigCC100_16164	38	0,11	1,03	1,01	0,016828	-2,68E-04	-2,92E-04	-0,02	-0,02828904443	0,1237353684	FALSE	FALSE
BigCC100_16173	48	0,12	1	1	0,016824	-2,28E-04	-2,88E-04	0	0	0,3370349873	FALSE	FALSE
BigCC100_1618	47	0,11	1,03	1,01	0,01676	-2,08E-04	-1,92E-04	-0,02	-0,02828904443	-0,1154772174	FALSE	FALSE
BigCC100_16181	49	0,12	1	1	0,016792	-7,20E-05	3,60E-05	0	0	NA	FALSE	FALSE
BigCC100_162	4399	4,04	7,91	13,67	0,037528	0,076232	6,60E-04	5,76	0,7892636431	-6,851786892	FALSE	FALSE
BigCC100_16201	42	0,13	1,01	0,99	0,016584	1,16E-04	2,44E-04	-0,02	-0,02885486267	1,072756342	FALSE	FALSE
BigCC100_16203	64	0,12	1,02	1,02	0,016548	8,00E-06	1,92E-04	0	0	4,584962501	FALSE	FALSE
BigCC100_16204	40	0,12	1	1	0,016808	-2,84E-04	-1,44E-04	0	0	-0,9798221181	FALSE	FALSE
BigCC100_16235	48	0,12	1	1,01	0,016864	-5,20E-05	-2,80E-04	0,01	0,01435529298	2,428843299	FALSE	FALSE
BigCC100_16237	44	0,12	1	1,02	0,01664	1,92E-04	-8,80E-05	0,02	0,0285691522	NA	FALSE	FALSE
BigCC100_16241	52	0,12	1	1	0,016592	7,20E-05	2,24E-04	0	0	1,637429921	FALSE	FALSE
BigCC100_1625	542	0,17	1,04	2,05	0,016548	5,60E-05	2,80E-04	1,01	0,9790403814	2,321928095	FALSE	FALSE
BigCC100_1628	147	0,13	1	1,01	0,016768	-9,60E-05	-2,28E-04	0,01	0,01435529298	1,247927513	FALSE	FALSE
BigCC100_163	1867	4,16	4,92	88,52	0,033864	0,014724	3,48E-04	83,6	4,16927323	-5,402938539	FALSE	FALSE
BigCC100_16311	31	0,14	1	0,98	0,016828	-6,80E-05	-2,08E-04	-0,02	-0,02914634566	1,612976877	FALSE	FALSE
BigCC100_16313	39	0,12	1	1	0,016652	5,60E-05	-5,20E-05	0	0	NA	FALSE	FALSE
BigCC100_16314	39	0,12	1	1	0,01684	-3,04E-04	-1,32E-04	0	0	-1,203533394	FALSE	FALSE
BigCC100_16315	55	0,11	1,01	1,02	0,0166	-7,60E-05	-8,40E-05	0,01	0,01421385922	0,1443899093	FALSE	FALSE
BigCC100_16319	36	0,11	1,01	1,03	0,016804	-1,88E-04	2,80E-05	0,02	0,02828904443	NA	FALSE	FALSE
BigCC100_16322	98	0,13	0,99	0,99	0,016696	1,04E-04	-2,00E-05	0	0	NA	FALSE	FALSE
BigCC100_16386	70	0,12	1	1	0,016624	1,88E-04	3,60E-05	0	0	-2,38466385	FALSE	FALSE
BigCC100_164	1798	4,29	4,87	12,56	0,032884	0,015476	3,72E-04	7,69	1,366842787	-5,378586202	FALSE	FALSE
BigCC100_16427	36	0,11	1,01	1,03	0,016624	2,12E-04	2,16E-04	0,02	0,02828904443	0,0269670476	FALSE	FALSE
BigCC100_16483	36	0,13	0,99	0,99	0,016604	-6,00E-05	-6,80E-05	0	0	0,1805722456	FALSE	FALSE
BigCC100_16485	54	0,12	1,02	0,99	0,016776	3,60E-05	-2,40E-05	-0,03	-0,04306872189	NA	FALSE	FALSE
BigCC100_16486	59	0,14	1,01	1	0,01674	-1,52E-04	1,08E-04	-0,01	-0,01435529298	NA	FALSE	FALSE
BigCC100_16488	66	0,14	0,98	0,98	0,016832	-1,60E-05	-1,88E-04	0	0	3,554588852	FALSE	FALSE
BigCC100_16490	57	0,13	0,99	0,98	0,016836	-3,60E-05	-8,00E-06	-0,01	-0,01464677596	-2,169925001	FALSE	FALSE
BigCC100_16491	34	0,14	1	1	0,016616	-3,20E-05	1,40E-04	0	0	NA	FALSE	FALSE
BigCC100_16492	60	0,12	1	1	0,01664	-1,20E-04	1,16E-04	0	0	NA	FALSE	FALSE
BigCC100_165	1796	4,23	4,75	20,63	0,033976	0,01524	2,56E-04	15,88	2,118744403	-5,895575282	FALSE	FALSE
BigCC100_16507	73	0,12	1	1,02	0,016812	-1,92E-04	-1,92E-04	0,02	0,0285691522	0	FALSE	FALSE
BigCC100_16513	63	0,14	0,98	1	0,016744	-1,48E-04	-1,44E-04	0,02	0,02914634566	-0,03952836419	FALSE	FALSE
BigCC100_16515	38	0,13	1,01	1,01	0,016524	6,40E-05	1,32E-04	0	0	1,044394119	FALSE	FALSE
BigCC100_16518	84	0,14	1	0,96	0,016528	3,16E-04	6,40E-05	-0,04	-0,05889368905	-2,303780748	FALSE	FALSE
BigCC100_16521	37	0,12	1,01	1,02	0,01652	1,48E-04	1,48E-04	0,01	0,01421385922	0	FALSE	FALSE
BigCC100_16524	118	0,14	1,02	1	0,016452	1,36E-04	1,56E-04	-0,02	-0,0285691522	0,1979393776	FALSE	FALSE
BigCC100_16530	40	0,12	1	1	0,016592	1,16E-04	2,24E-04	0	0	0,9493739269	FALSE	FALSE
BigCC100_16536	44	0,12	1	1,03	0,016748	4,40E-05	-2,12E-04	0,03	0,04264433741	NA	FALSE	FALSE
BigCC100_16541	31	0,12	1,02	1,02	0,01656	2,76E-04	1,08E-04	0	0	-1,353636955	FALSE	FALSE
BigCC100_16542	42	0,12	1	1	0,016848	-2,76E-04	-9,20E-05	0	0	-1,584962501	FALSE	FALSE
BigCC100_16548	42	0,12	1	1	0,01674	8,80E-05	7,60E-05	0	0	-0,2115041052	FALSE	FALSE
BigCC100_16565	53	0,12	1	0,99	0,016844	-2,04E-04	-1,88E-04	-0,01	-0,0144995697	-0,1178364903	FALSE	FALSE
BigCC100_16566	40	0,12	1,02	1,02	0,016508	1,08E-04	2,32E-04	0	0	1,103093493	FALSE	FALSE
BigCC100_16567	31	0,12	1,01	1	0,016832	-1,48E-04	0	-0,01	-0,01435529298	-Inf	FALSE	FALSE
BigCC100_16572	83	0,13	0,99	0,99	0,016588	1,20E-04	1,64E-04	0	0	0,450661409	FALSE	FALSE
BigCC100_16573	52	0,12	1,01	1,02	0,016508	3,16E-04	1,80E-04	0,01	0,01421385922	-0,8119276518	FALSE	FALSE
BigCC100_16575	55	0,12	1	1,03	0,016748	-1,60E-04	-2,12E-04	0,03	0,04264433741	0,4059923597	FALSE	FALSE
BigCC100_16581	47	0,14	1	1,01	0,016752	9,20E-05	-2,28E-04	0,01	0,01435529298	NA	FALSE	FALSE
BigCC100_16582	31	0,12	1	1	0,016832	1,20E-05	1,60E-05	0	0	0,4150374993	FALSE	FALSE
BigCC100_16585	38	0,14	0,98	1	0,016516	9,20E-05	1,60E-05	0,02	0,02914634566	-2,523561956	FALSE	FALSE
BigCC100_16597	31	0,11	1,02	1,03	0,0166	2,28E-04	1,56E-04	0,01	0,01407518521	-0,5474877953	FALSE	FALSE
BigCC100_166	1511	2,65	2,79	10,78	0,027544	0,00982	3,16E-04	7,99	1,950020151	-4,957726561	FALSE	FALSE
BigCC100_16600	38	0,11	1,01	1,01	0,0167	-1,12E-04	-8,00E-06	0	0	-3,807354922	FALSE	FALSE
BigCC100_16605	31	0,14	0,98	1	0,01648	3,56E-04	1,40E-04	0,02	0,02914634566	-1,346450414	FALSE	FALSE
BigCC100_16607	32	0,13	0,99	0,99	0,016824	-1,48E-04	4,00E-06	0	0	NA	FALSE	FALSE
BigCC100_16608	31	0,13	0,99	1,01	0,016804	-2,88E-04	-1,52E-04	0,02	0,02885486267	-0,921997488	FALSE	FALSE
BigCC100_16610	31	0,11	1,01	1,03	0,016672	8,40E-05	-6,40E-05	0,02	0,02828904443	NA	FALSE	FALSE
BigCC100_16612	43	0,13	0,99	0,99	0,01658	2,44E-04	4,00E-06	0	0	-5,930737338	FALSE	FALSE
BigCC100_16617	38	0,11	1,01	1,03	0,016824	-2,80E-04	-4,00E-06	0,02	0,02828904443	-6,129283017	FALSE	FALSE
BigCC100_16618	39	0,12	1	0,99	0,016484	2,68E-04	6,80E-05	-0,01	-0,0144995697	-1,978626349	FALSE	FALSE
BigCC100_16619	32	0,11	1,03	1,04	0,016564	-2,40E-05	-2,40E-05	0,01	0,01393919096	0	FALSE	FALSE
BigCC100_16624	39	0,12	1	1	0,016704	5,20E-05	1,48E-04	0	0	1,509013647	FALSE	FALSE
BigCC100_16625	35	0,11	1,01	1,03	0,016548	2,16E-04	1,08E-04	0,02	0,02828904443	-1	FALSE	FALSE
BigCC100_16627	32	0,13	0,99	1,01	0,016804	4,40E-05	-6,00E-05	0,02	0,02885486267	NA	FALSE	FALSE
BigCC100_1663	79	0,12	1	1,01	0,016584	2,68E-04	2,48E-04	0,01	0,01435529298	-0,1118928801	FALSE	FALSE
BigCC100_16630	36	0,12	1	0,98	0,01654	3,08E-04	3,28E-04	-0,02	-0,02914634566	0,09076546392	FALSE	FALSE
BigCC100_16631	32	0,14	1	1,01	0,016828	-1,84E-04	-7,20E-05	0,01	0,01435529298	-1,353636955	FALSE	FALSE
BigCC100_16632	31	0,12	1	1	0,016672	9,20E-05	1,68E-04	0	0	0,8687554667	FALSE	FALSE
BigCC100_16634	31	0,12	1	1,01	0,016688	-1,60E-05	1,40E-04	0,01	0,01435529298	NA	FALSE	FALSE
BigCC100_16636	40	0,11	1	0,99	0,016612	-9,60E-05	-5,60E-05	-0,01	-0,0144995697	-0,7776075787	FALSE	FALSE
BigCC100_16640	31	0,12	1	1,03	0,016512	3,28E-04	8,00E-06	0,03	0,04264433741	-5,357552005	FALSE	FALSE
BigCC100_16641	35	0,12	1,01	1	0,016588	2,40E-05	2,60E-04	-0,01	-0,01435529298	3,437405312	FALSE	FALSE
BigCC100_16642	39	0,14	0,98	1	0,016748	8,40E-05	6,00E-05	0,02	0,02914634566	-0,4854268272	FALSE	FALSE
BigCC100_16651	32	0,14	0,98	1,01	0,016808	-2,28E-04	-2,52E-04	0,03	0,04350163864	0,1443899093	FALSE	FALSE
BigCC100_16653	39	0,11	1,02	1,01	0,01686	-3,36E-04	-2,80E-05	-0,01	-0,01421385922	-3,584962501	FALSE	FALSE
BigCC100_16654	31	0,11	1,01	1,03	0,016672	-1,04E-04	-1,60E-04	0,02	0,02828904443	0,6214883767	FALSE	FALSE
BigCC100_16676	32	0,13	0,99	1,01	0,01668	6,00E-05	1,44E-04	0,02	0,02885486267	1,263034406	FALSE	FALSE
BigCC100_16678	33	0,11	1,02	1,03	0,016708	-1,84E-04	-1,60E-05	0,01	0,01407518521	-3,523561956	FALSE	FALSE
BigCC100_167	1799	4,14	4,75	150,38	0,032516	0,015588	5,68E-04	145,63	4,984541383	-4,778401097	FALSE	FALSE
BigCC100_16700	32	0,11	1,01	1,05	0,016816	-2,80E-04	-2,00E-05	0,04	0,05603403491	-3,807354922	FALSE	FALSE
BigCC100_16701	67	0,13	1	1,01	0,016584	-3,60E-05	2,52E-04	0,01	0,01435529298	NA	FALSE	FALSE
BigCC100_16717	34	0,13	0,99	1,01	0,016552	2,08E-04	-4,00E-06	0,02	0,02885486267	NA	FALSE	FALSE
BigCC100_16722	43	0,12	1,02	1,02	0,016832	-2,92E-04	-1,64E-04	0	0	-0,8322725543	FALSE	FALSE
BigCC100_16725	31	0,11	1,01	1,02	0,01658	8,80E-05	-3,60E-05	0,01	0,01421385922	NA	FALSE	FALSE
BigCC100_16737	33	0,11	1,01	1,03	0,016632	1,24E-04	1,80E-04	0,02	0,02828904443	0,5376567859	FALSE	FALSE
BigCC100_16765	71	0,12	1	1	0,01686	-3,28E-04	-3,32E-04	0	0	0,01748742673	FALSE	FALSE
BigCC100_1677	83	0,12	1	1	0,01684	-9,20E-05	-2,00E-05	0	0	-2,201633861	FALSE	FALSE
BigCC100_1678	169	0,14	0,99	1,03	0,016816	-1,76E-04	-2,68E-04	0,04	0,0571439071	0,6066575718	FALSE	FALSE
BigCC100_168	1800	4,1	6,38	25,77	0,032756	0,01354	3,60E-04	19,39	2,014064208	-5,233087022	FALSE	FALSE
BigCC100_169	1795	4,11	6,17	54,88	0,03314	0,013768	0,002312	48,71	3,152938087	-2,5741057	FALSE	FALSE
BigCC100_16923	102	0,11	1,01	1,01	0,01656	-8,80E-05	2,52E-04	0	0	NA	FALSE	FALSE
BigCC100_16928	81	0,14	0,98	1,01	0,016824	-2,00E-04	-6,80E-05	0,03	0,04350163864	-1,556393349	FALSE	FALSE
BigCC100_16929	45	0,11	1,01	1,01	0,01654	2,44E-04	2,96E-04	0	0	0,2787160281	FALSE	FALSE
BigCC100_1693	83	0,12	1,01	1	0,016772	7,20E-05	7,60E-05	-0,01	-0,01435529298	0,078002512	FALSE	FALSE
BigCC100_16930	35	0,12	1	1,02	0,0168	-2,36E-04	1,60E-05	0,02	0,0285691522	NA	FALSE	FALSE
BigCC100_16931	50	0,12	1	1,02	0,01682	-1,36E-04	8,00E-06	0,02	0,0285691522	NA	FALSE	FALSE
BigCC100_16932	41	0,12	1	1	0,016812	2,00E-05	-2,88E-04	0	0	NA	FALSE	FALSE
BigCC100_16934	55	0,12	1	1	0,016824	-2,80E-04	-1,20E-05	0	0	-4,544320516	FALSE	FALSE
BigCC100_16938	48	0,12	1,01	1,02	0,016836	-4,00E-06	-2,00E-05	0,01	0,01421385922	2,321928095	FALSE	FALSE
BigCC100_16939	33	0,12	1	1	0,016544	5,20E-05	2,84E-04	0	0	2,449307401	FALSE	FALSE
BigCC100_16940	38	0,13	1	0,99	0,01652	1,00E-04	1,84E-04	-0,01	-0,0144995697	0,8797057663	FALSE	FALSE
BigCC100_16941	31	0,13	1,01	0,99	0,016572	2,84E-04	2,52E-04	-0,02	-0,02885486267	-0,172467196	FALSE	FALSE
BigCC100_16942	43	0,12	1	1,03	0,01652	2,28E-04	1,20E-05	0,03	0,04264433741	-4,247927513	FALSE	FALSE
BigCC100_16945	90	0,13	1,02	1	0,016536	3,12E-04	-4,00E-06	-0,02	-0,0285691522	NA	FALSE	FALSE
BigCC100_16947	46	0,12	1,02	1	0,016544	4,00E-05	3,04E-04	-0,02	-0,0285691522	2,925999419	FALSE	FALSE
BigCC100_16950	99	0,14	1	0,98	0,016596	2,28E-04	-1,60E-05	-0,02	-0,02914634566	NA	FALSE	FALSE
BigCC100_16957	42	0,12	1,02	1	0,016536	0	8,00E-06	-0,02	-0,0285691522	Inf	FALSE	FALSE
BigCC100_16958	56	0,11	1,01	1,01	0,016676	-9,60E-05	-1,28E-04	0	0	0,4150374993	FALSE	FALSE
BigCC100_1696	216	0,12	1,01	1	0,016544	2,92E-04	3,20E-05	-0,01	-0,01435529298	-3,189824559	FALSE	FALSE
BigCC100_16962	60	0,12	1	1	0,016696	1,52E-04	1,36E-04	0	0	-0,1604646722	FALSE	FALSE
BigCC100_16964	84	0,11	1,01	1,01	0,016824	2,40E-05	-1,20E-05	0	0	NA	FALSE	FALSE
BigCC100_16965	48	0,14	0,98	1	0,016648	-2,40E-05	1,96E-04	0,02	0,02914634566	NA	FALSE	FALSE
BigCC100_16966	31	0,13	0,99	0,99	0,016836	-2,88E-04	-3,32E-04	0	0	0,2051144299	FALSE	FALSE
BigCC100_16967	38	0,13	1	0,99	0,016588	2,20E-04	2,28E-04	-0,01	-0,0144995697	0,05153030064	FALSE	FALSE
BigCC100_16983	36	0,14	0,98	0,98	0,01658	4,00E-06	2,00E-05	0	0	2,321928095	FALSE	FALSE
BigCC100_16985	36	0,12	1	1,02	0,016828	-1,32E-04	-1,20E-05	0,02	0,0285691522	-3,459431619	FALSE	FALSE
BigCC100_17	1791	4,21	6,03	45,75	0,033472	0,015172	3,92E-04	39,72	2,923541836	-5,274413812	FALSE	FALSE
BigCC100_170	1798	4,12	4,85	130,77	0,032936	0,015448	2,16E-04	125,92	4,752903052	-6,160244947	FALSE	FALSE
BigCC100_17014	38	0,13	0,99	0,99	0,016856	-1,60E-05	-3,12E-04	0	0	4,285402219	FALSE	FALSE
BigCC100_17029	96	0,11	1,02	1,01	0,016548	2,56E-04	2,32E-04	-0,01	-0,01421385922	-0,1420190049	FALSE	FALSE
BigCC100_17041	32	0,12	1	1	0,016808	3,60E-05	-2,72E-04	0	0	NA	FALSE	FALSE
BigCC100_17044	32	0,12	1	1,02	0,016552	-3,60E-05	8,00E-06	0,02	0,0285691522	NA	FALSE	FALSE
BigCC100_17046	54	0,11	1,01	1,01	0,01654	3,04E-04	0	0	0	-Inf	FALSE	FALSE
BigCC100_17059	40	0,13	0,98	0,99	0,016604	6,00E-05	2,56E-04	0,01	0,01464677596	2,093109404	FALSE	FALSE
BigCC100_17063	43	0,13	1,01	0,99	0,016764	6,80E-05	-5,20E-05	-0,02	-0,02885486267	NA	FALSE	FALSE
BigCC100_17067	130	0,13	1,02	1,03	0,016716	-1,20E-04	-1,96E-04	0,01	0,01407518521	0,7078192485	FALSE	FALSE
BigCC100_17069	66	0,11	1,01	1,01	0,016556	1,20E-04	-4,00E-06	0	0	NA	FALSE	FALSE
BigCC100_17072	32	0,11	1,01	1,01	0,016856	-1,40E-04	-1,36E-04	0	0	-0,04182017569	FALSE	FALSE
BigCC100_17079	42	0,12	1,01	1	0,01652	3,60E-05	7,20E-05	-0,01	-0,01435529298	1	FALSE	FALSE
BigCC100_17095	63	0,12	1	1	0,016824	-4,40E-05	-2,32E-04	0	0	2,398549376	FALSE	FALSE
BigCC100_171	1799	4,03	5,95	24,81	0,032996	0,015424	3,60E-04	18,86	2,059960162	-5,42103624	FALSE	FALSE
BigCC100_17101	32	0,13	0,99	0,99	0,016696	1,28E-04	8,00E-06	0	0	-4	FALSE	FALSE
BigCC100_17103	48	0,14	0,98	0,98	0,016648	-1,16E-04	1,36E-04	0	0	NA	FALSE	FALSE
BigCC100_17114	44	0,11	1,02	1,03	0,01686	-3,32E-04	-3,08E-04	0,01	0,01407518521	-0,1082528907	FALSE	FALSE
BigCC100_1712	84	0,13	1	1	0,016596	1,72E-04	2,36E-04	0	0	0,4563782947	FALSE	FALSE
BigCC100_17132	75	0,11	1,02	1,02	0,016568	1,84E-04	2,80E-04	0	0	0,6057210609	FALSE	FALSE
BigCC100_17148	54	0,13	0,99	1	0,016556	3,00E-04	2,40E-05	0,01	0,0144995697	-3,64385619	FALSE	FALSE
BigCC100_1715	117	0,14	0,98	1,01	0,01652	8,00E-06	2,88E-04	0,03	0,04350163864	5,169925001	FALSE	FALSE
BigCC100_17151	31	0,12	1	1	0,016588	8,00E-06	2,44E-04	0	0	4,930737338	FALSE	FALSE
BigCC100_17153	34	0,11	1,01	1,01	0,016812	-2,64E-04	-1,08E-04	0	0	-1,289506617	FALSE	FALSE
BigCC100_1718	95	0,12	1	1	0,01682	-6,40E-05	-2,84E-04	0	0	2,14974712	FALSE	FALSE
BigCC100_17193	39	0,12	1,02	1,02	0,016576	2,72E-04	2,64E-04	0	0	-0,04306872189	FALSE	FALSE
BigCC100_172	1788	4,17	6,15	65,88	0,032876	0,015156	3,56E-04	59,73	3,421182239	-5,411867994	FALSE	FALSE
BigCC100_17204	35	0,14	1	0,98	0,016836	-2,12E-04	2,40E-05	-0,02	-0,02914634566	NA	FALSE	FALSE
BigCC100_17225	37	0,13	1,01	0,99	0,016756	-7,20E-05	-2,52E-04	-0,02	-0,02885486267	1,807354922	FALSE	FALSE
BigCC100_17284	33	0,11	1,03	1,01	0,016596	2,12E-04	2,64E-04	-0,02	-0,02828904443	0,3164736648	FALSE	FALSE
BigCC100_173	1783	3,99	4,72	63,21	0,032644	0,013472	3,40E-04	58,49	3,74329405	-5,308285487	FALSE	FALSE
BigCC100_1731	150	0,13	1,02	1,03	0,016608	1,52E-04	0	0,01	0,01407518521	-Inf	FALSE	FALSE
BigCC100_1732	830	0,41	1,19	19,18	0,016816	-2,68E-04	-1,04E-04	17,99	4,010569242	-1,365649472	FALSE	FALSE
BigCC100_1733	93	0,14	0,99	0,99	0,016856	-2,96E-04	-1,16E-04	0	0	-1,351472371	FALSE	FALSE
BigCC100_1734	113	0,15	0,99	1	0,016608	-7,20E-05	-8,40E-05	0,01	0,0144995697	0,2223924213	FALSE	FALSE
BigCC100_17347	55	0,12	1,02	1	0,016844	-2,00E-05	-8,00E-06	-0,02	-0,0285691522	-1,321928095	FALSE	FALSE
BigCC100_1736	465	0,23	1,06	2,05	0,016604	1,04E-04	2,00E-04	0,99	0,9515596449	0,9434164716	FALSE	FALSE
BigCC100_17360	37	0,11	1,03	1,04	0,016568	-4,40E-05	-5,20E-05	0,01	0,01393919096	0,2410080995	FALSE	FALSE
BigCC100_17368	40	0,11	1,01	1,01	0,016832	-2,96E-04	-8,40E-05	0	0	-1,817135943	FALSE	FALSE
BigCC100_1737	707	0,45	1,11	6,12	0,0167	1,08E-04	1,24E-04	5,01	2,462971976	0,1993088082	FALSE	FALSE
BigCC100_17376	31	0,11	1,01	1,01	0,01652	4,00E-06	2,00E-05	0	0	2,321928095	FALSE	FALSE
BigCC100_1738	595	0,22	1,08	3,14	0,016836	-1,32E-04	-7,60E-05	2,06	1,539733247	-0,7964666059	FALSE	FALSE
BigCC100_17382	34	0,13	1	0,99	0,016676	-1,36E-04	-5,20E-05	-0,01	-0,0144995697	-1,387023123	FALSE	FALSE
BigCC100_1739	223	0,15	1,03	1,03	0,016556	2,00E-04	-3,60E-05	0	0	NA	FALSE	FALSE
BigCC100_174	1796	4,12	6,03	41,71	0,033612	0,015236	3,68E-04	35,68	2,790163405	-5,371634617	FALSE	FALSE
BigCC100_1740	163	0,17	1,03	1,03	0,016744	-1,88E-04	1,08E-04	0	0	NA	FALSE	FALSE
BigCC100_1741	169	0,15	0,99	0,99	0,016548	2,28E-04	2,80E-04	0	0	0,2963930028	FALSE	FALSE
BigCC100_1742	173	0,14	1,04	1,02	0,0166	1,52E-04	-8,80E-05	-0,02	-0,02801437617	NA	FALSE	FALSE
BigCC100_1743	125	0,12	1,03	1,03	0,016688	-1,04E-04	1,20E-04	0	0	NA	FALSE	FALSE
BigCC100_1744	56	0,13	0,99	1,02	0,016796	2,80E-05	3,60E-05	0,03	0,04306872189	0,3625700794	FALSE	FALSE
BigCC100_17441	48	0,11	1,04	1,01	0,016708	-1,16E-04	-1,76E-04	-0,03	-0,04222823539	0,6014506235	FALSE	FALSE
BigCC100_17442	169	0,13	0,99	1	0,016536	2,40E-05	8,00E-06	0,01	0,0144995697	-1,584962501	FALSE	FALSE
BigCC100_1745	1315	1,72	2,63	4,13	0,019776	0,007388	2,84E-04	1,5	0,6510789821	-4,701221031	FALSE	FALSE
BigCC100_1746	1049	0,47	1,3	1,27	0,01682	-2,04E-04	-1,76E-04	-0,03	-0,03368312626	-0,2129937233	FALSE	FALSE
BigCC100_1747	382	0,17	1,03	3,08	0,016728	9,20E-05	-6,00E-05	2,05	1,580286014	NA	FALSE	FALSE
BigCC100_17479	42	0,12	1	1,01	0,016596	-1,32E-04	-4,80E-05	0,01	0,01435529298	-1,459431619	FALSE	FALSE
BigCC100_1748	152	0,14	1,04	1,02	0,016548	2,60E-04	2,64E-04	-0,02	-0,02801437617	0,02202630633	FALSE	FALSE
BigCC100_1749	681	0,24	1,07	5,07	0,016844	-2,24E-04	-2,64E-04	4	2,244374951	0,2370391973	FALSE	FALSE
BigCC100_17497	104	0,13	1	1	0,01652	2,36E-04	2,28E-04	0	0	-0,0497530352	FALSE	FALSE
BigCC100_17498	93	0,12	1	1,02	0,016808	-2,92E-04	-1,04E-04	0,02	0,0285691522	-1,489384841	FALSE	FALSE
BigCC100_1750	582	0,41	1,28	9,18	0,016556	2,80E-04	3,60E-05	7,9	2,842350343	-2,959358016	FALSE	FALSE
BigCC100_17512	69	0,13	1,01	1	0,016648	1,20E-05	1,64E-04	-0,01	-0,01435529298	3,772589504	FALSE	FALSE
BigCC100_17514	81	0,13	1,02	1	0,016748	-2,08E-04	-2,00E-05	-0,02	-0,0285691522	-3,378511623	FALSE	FALSE
BigCC100_1752	174	0,13	1,02	1,01	0,016816	-2,32E-04	-1,40E-04	-0,01	-0,01421385922	-0,7286979782	FALSE	FALSE
BigCC100_17529	69	0,13	1,01	0,99	0,016832	-3,20E-04	-3,04E-04	-0,02	-0,02885486267	-0,07400058144	FALSE	FALSE
BigCC100_1753	62	0,13	1,01	0,99	0,016832	-1,04E-04	-1,60E-05	-0,02	-0,02885486267	-2,700439718	FALSE	FALSE
BigCC100_17530	81	0,15	1	0,98	0,016536	3,16E-04	4,00E-06	-0,02	-0,02914634566	-6,303780748	FALSE	FALSE
BigCC100_17534	60	0,13	1,01	0,99	0,01666	-4,00E-05	-1,16E-04	-0,02	-0,02885486267	1,5360529	FALSE	FALSE
BigCC100_17539	57	0,13	1,01	0,99	0,016664	1,60E-04	-6,00E-05	-0,02	-0,02885486267	NA	FALSE	FALSE
BigCC100_1754	66	0,12	1,02	1	0,01682	8,00E-06	-3,12E-04	-0,02	-0,0285691522	NA	FALSE	FALSE
BigCC100_17549	50	0,14	1	0,98	0,016528	-2,00E-05	2,68E-04	-0,02	-0,02914634566	NA	FALSE	FALSE
BigCC100_1755	484	0,25	1,14	3,08	0,016576	-3,20E-05	2,16E-04	1,94	1,433896527	NA	FALSE	FALSE
BigCC100_17554	57	0,13	1,01	0,99	0,016604	2,08E-04	6,40E-05	-0,02	-0,02885486267	-1,700439718	FALSE	FALSE
BigCC100_17555	32	0,14	1	0,98	0,016544	4,40E-05	-8,00E-06	-0,02	-0,02914634566	NA	FALSE	FALSE
BigCC100_17556	55	0,13	1,01	0,99	0,01662	0	-3,20E-05	-0,02	-0,02885486267	NA	FALSE	FALSE
BigCC100_1756	147	0,17	1,02	0,99	0,016808	-1,92E-04	1,20E-05	-0,03	-0,04306872189	NA	FALSE	FALSE
BigCC100_17563	56	0,14	1	0,98	0,016588	-3,60E-05	2,08E-04	-0,02	-0,02914634566	NA	FALSE	FALSE
BigCC100_17564	38	0,12	1,02	1	0,016832	-8,00E-06	-2,24E-04	-0,02	-0,0285691522	4,807354922	FALSE	FALSE
BigCC100_1757	246	0,16	1,05	2,02	0,016588	6,80E-05	-4,00E-05	0,97	0,9439659651	NA	FALSE	FALSE
BigCC100_17573	54	0,12	1,02	1	0,016608	-1,60E-05	2,44E-04	-0,02	-0,0285691522	NA	FALSE	FALSE
BigCC100_17574	62	0,13	1,01	0,99	0,016836	-2,60E-04	-2,00E-05	-0,02	-0,02885486267	-3,700439718	FALSE	FALSE
BigCC100_17575	66	0,13	1,01	0,99	0,016548	-2,80E-05	4,00E-05	-0,02	-0,02885486267	NA	FALSE	FALSE
BigCC100_17577	45	0,13	1,01	0,99	0,0168	-1,16E-04	1,60E-05	-0,02	-0,02885486267	NA	FALSE	FALSE
BigCC100_1758	205	0,15	1,03	1,01	0,016548	1,08E-04	2,20E-04	-0,02	-0,02828904443	1,026472211	FALSE	FALSE
BigCC100_17582	45	0,12	1,02	1	0,016768	-3,20E-05	-2,16E-04	-0,02	-0,0285691522	2,754887502	FALSE	FALSE
BigCC100_17583	34	0,12	1,02	1	0,016528	1,20E-05	1,32E-04	-0,02	-0,0285691522	3,459431619	FALSE	FALSE
BigCC100_1759	435	0,18	1,03	1,01	0,016584	4,00E-05	-5,20E-05	-0,02	-0,02828904443	NA	FALSE	FALSE
BigCC100_17590	84	0,13	1,02	0,99	0,016664	-2,40E-05	-1,44E-04	-0,03	-0,04306872189	2,584962501	FALSE	FALSE
BigCC100_17592	47	0,13	1,02	0,99	0,016836	0	-3,08E-04	-0,03	-0,04306872189	NA	FALSE	FALSE
BigCC100_17593	39	0,15	0,99	0,97	0,016512	3,20E-04	1,16E-04	-0,02	-0,02944377789	-1,4639471	FALSE	FALSE
BigCC100_17599	55	0,15	0,99	0,97	0,01654	2,88E-04	3,12E-04	-0,02	-0,02944377789	0,1154772174	FALSE	FALSE
BigCC100_176	1803	4,31	6	48,92	0,033544	0,01528	3,64E-04	42,92	3,027389998	-5,391562283	FALSE	FALSE
BigCC100_1760	405	0,21	1,08	1,03	0,016816	-2,68E-04	-1,60E-05	-0,05	-0,06838697498	-4,06608919	FALSE	FALSE
BigCC100_17600	61	0,13	1,01	0,99	0,016752	-1,68E-04	-2,12E-04	-0,02	-0,02885486267	0,3356030318	FALSE	FALSE
BigCC100_17603	46	0,13	0,98	0,99	0,01682	-2,04E-04	-1,12E-04	0,01	0,01464677596	-0,8650704199	FALSE	FALSE
BigCC100_17605	39	0,13	1,01	1	0,016604	2,20E-04	2,04E-04	-0,01	-0,01435529298	-0,1089343716	FALSE	FALSE
BigCC100_1761	599	0,2	1,06	1,02	0,016744	9,60E-05	7,60E-05	-0,04	-0,05549511259	-0,3370349873	FALSE	FALSE
BigCC100_1762	225	0,16	1,03	1	0,016588	6,80E-05	-1,60E-05	-0,03	-0,04264433741	NA	FALSE	FALSE
BigCC100_17622	71	0,13	1,01	0,98	0,016552	1,48E-04	0	-0,03	-0,04350163864	-Inf	FALSE	FALSE
BigCC100_17625	71	0,13	1,01	0,99	0,016684	1,36E-04	4,40E-05	-0,02	-0,02885486267	-1,628031223	FALSE	FALSE
BigCC100_1763	261	0,16	1,05	2,02	0,016616	2,12E-04	-4,00E-05	0,97	0,9439659651	NA	FALSE	FALSE
BigCC100_1764	285	0,16	1,04	1,01	0,016504	3,16E-04	2,40E-04	-0,03	-0,04222823539	-0,3968901526	FALSE	FALSE
BigCC100_17646	41	0,12	1,01	1,02	0,01668	1,64E-04	1,44E-04	0,01	0,01421385922	-0,1876270032	FALSE	FALSE
BigCC100_17647	47	0,13	1,01	0,99	0,016624	-2,80E-05	2,20E-04	-0,02	-0,02885486267	NA	FALSE	FALSE
BigCC100_1765	114	0,16	1	0,99	0,016588	-6,00E-05	-7,60E-05	-0,01	-0,0144995697	0,3410369178	FALSE	FALSE
BigCC100_1766	106	0,13	1,02	1	0,016608	2,04E-04	-5,20E-05	-0,02	-0,0285691522	NA	FALSE	FALSE
BigCC100_17665	46	0,13	1,01	0,99	0,016652	-2,80E-05	9,20E-05	-0,02	-0,02885486267	NA	FALSE	FALSE
BigCC100_1767	650	0,22	1,09	4,04	0,016764	6,40E-05	-3,20E-05	2,95	1,890027158	NA	FALSE	FALSE
BigCC100_17672	33	0,13	1,01	1	0,016836	-8,00E-06	-2,12E-04	-0,01	-0,01435529298	4,727920455	FALSE	FALSE
BigCC100_1768	512	0,2	1,09	2,06	0,016808	1,60E-05	-4,00E-06	0,97	0,9183162024	NA	FALSE	FALSE
BigCC100_17688	42	0,14	1	0,98	0,016848	-1,60E-04	-3,12E-04	-0,02	-0,02914634566	0,963474124	FALSE	FALSE
BigCC100_1769	133	0,15	0,97	1	0,016852	-1,12E-04	-3,12E-04	0,03	0,04394334759	1,478047297	FALSE	FALSE
BigCC100_177	1792	4,43	5,14	15,98	0,033144	0,013156	3,68E-04	10,84	1,636427144	-5,159871337	FALSE	FALSE
BigCC100_1770	53	0,12	1,02	1	0,016844	0	-1,32E-04	-0,02	-0,0285691522	NA	FALSE	FALSE
BigCC100_17701	31	0,12	1,02	1,01	0,016692	-1,36E-04	1,32E-04	-0,01	-0,01421385922	NA	FALSE	FALSE
BigCC100_1771	144	0,15	1,01	0,99	0,016596	-4,40E-05	2,20E-04	-0,02	-0,02885486267	NA	FALSE	FALSE
BigCC100_1772	234	0,14	0,98	1	0,016832	-2,20E-04	-9,20E-05	0,02	0,02914634566	-1,257797757	FALSE	FALSE
BigCC100_1773	355	0,18	1,03	2,01	0,016744	-1,92E-04	-1,44E-04	0,98	0,964551164	-0,4150374993	FALSE	FALSE
BigCC100_1774	256	0,2	1,05	2,01	0,016628	-9,20E-05	-1,24E-04	0,96	0,9368061735	0,4306343543	FALSE	FALSE
BigCC100_1775	190	0,14	1,04	1,03	0,01654	2,88E-04	1,80E-04	-0,01	-0,01393919096	-0,6780719051	FALSE	FALSE
BigCC100_1776	190	0,16	1,06	1,02	0,01668	1,60E-04	-1,28E-04	-0,04	-0,05549511259	NA	FALSE	FALSE
BigCC100_1777	95	0,15	0,99	0,99	0,016544	1,12E-04	4,00E-05	0	0	-1,485426827	FALSE	FALSE
BigCC100_1778	40	0,12	1,02	1,01	0,016556	1,80E-04	1,08E-04	-0,01	-0,01421385922	-0,7369655942	FALSE	FALSE
BigCC100_1779	802	0,17	1,03	1,02	0,016576	2,68E-04	-4,00E-05	-0,01	-0,01407518521	NA	FALSE	FALSE
BigCC100_178	1798	4,7	5,28	69,03	0,03288	0,015368	3,72E-04	63,75	3,70861365	-5,368482993	FALSE	FALSE
BigCC100_1780	39	0,14	1	0,98	0,016648	-9,60E-05	-1,16E-04	-0,02	-0,02914634566	0,2730184944	FALSE	FALSE
BigCC100_1781	153	0,14	1,02	1	0,016584	2,64E-04	1,60E-05	-0,02	-0,0285691522	-4,044394119	FALSE	FALSE
BigCC100_1782	120	0,14	1,02	0,99	0,016764	-2,28E-04	-1,52E-04	-0,03	-0,04306872189	-0,5849625007	FALSE	FALSE
BigCC100_1784	31	0,13	1,01	0,99	0,016824	-6,00E-05	4,00E-06	-0,02	-0,02885486267	NA	FALSE	FALSE
BigCC100_17841	35	0,13	1,01	0,98	0,016644	-5,20E-05	-3,60E-05	-0,03	-0,04350163864	-0,5305147167	FALSE	FALSE
BigCC100_17864	44	0,14	1	0,98	0,01662	2,08E-04	2,04E-04	-0,02	-0,02914634566	-0,02801437617	FALSE	FALSE
BigCC100_17877	71	0,13	1,01	0,97	0,016832	-1,48E-04	-2,36E-04	-0,04	-0,05829864056	0,6731896837	FALSE	FALSE
BigCC100_1789	182	0,15	1	0,98	0,016584	2,64E-04	-6,80E-05	-0,02	-0,02914634566	NA	FALSE	FALSE
BigCC100_179	1810	4,36	4,51	2380,62	0,03296	0,015444	3,76E-04	2376,11	9,043994204	-5,360169987	TRUE	FALSE
BigCC100_1790	121	0,15	0,99	0,96	0,016832	-4,00E-06	-3,16E-04	-0,03	-0,04439411936	6,303780748	FALSE	FALSE
BigCC100_1791	2435	0,24	1,05	1,04	0,0166	0,013136	1,76E-04	-0,01	-0,01380579953	-6,221806793	FALSE	FALSE
BigCC100_17915	53	0,14	1,01	0,98	0,016668	1,64E-04	1,04E-04	-0,03	-0,04350163864	-0,6571122865	FALSE	FALSE
BigCC100_17918	31	0,12	1	0,98	0,016808	2,40E-05	-2,08E-04	-0,02	-0,02914634566	NA	FALSE	FALSE
BigCC100_1794	53	0,14	0,98	0,98	0,016524	3,12E-04	5,60E-05	0	0	-2,478047297	FALSE	FALSE
BigCC100_1795	83	0,1	1,04	1,02	0,016556	2,92E-04	2,40E-05	-0,02	-0,02801437617	-3,604862058	FALSE	FALSE
BigCC100_1796	263	0,12	1,05	1,05	0,016772	-1,68E-04	-1,96E-04	0	0	0,2223924213	FALSE	FALSE
BigCC100_1797	325	0,14	1,02	1,01	0,01684	-2,16E-04	-2,48E-04	-0,01	-0,01421385922	0,1993088082	FALSE	FALSE
BigCC100_1798	319	0,17	1	1,01	0,016592	-1,60E-05	4,00E-05	0,01	0,01435529298	NA	FALSE	FALSE
BigCC100_1799	68	0,12	1	1	0,0166	-6,80E-05	-8,80E-05	0	0	0,3719687774	FALSE	FALSE
BigCC100_17991	36	0,14	1	0,98	0,016692	-1,20E-05	1,16E-04	-0,02	-0,02914634566	NA	FALSE	FALSE
BigCC100_17996	32	0,13	1,01	0,99	0,01684	-1,88E-04	-1,04E-04	-0,02	-0,02885486267	-0,8541491335	FALSE	FALSE
BigCC100_18	1797	4,18	5,12	75,95	0,03318	0,015068	3,72E-04	70,83	3,890834249	-5,340041507	FALSE	FALSE
BigCC100_180	2263	4,07	4,97	30,73	0,032868	0,02262	4,32E-04	25,76	2,62833001	-5,710423807	FALSE	FALSE
BigCC100_1800	189	0,16	1,05	1,03	0,016596	9,60E-05	-8,00E-06	-0,02	-0,02774499048	NA	FALSE	FALSE
BigCC100_1801	339	0,16	1,03	1,01	0,016732	1,20E-05	-2,80E-05	-0,02	-0,02828904443	NA	FALSE	FALSE
BigCC100_1802	161	0,16	1	1	0,016536	3,08E-04	4,00E-05	0	0	-2,944858446	FALSE	FALSE
BigCC100_1803	45	0,11	1,03	0,99	0,0166	-5,60E-05	8,80E-05	-0,04	-0,0571439071	NA	FALSE	FALSE
BigCC100_1804	127	0,16	1	0,99	0,016812	2,80E-05	-2,20E-04	-0,01	-0,0144995697	NA	FALSE	FALSE
BigCC100_18044	57	0,13	0,99	0,99	0,016832	-2,16E-04	-1,56E-04	0	0	-0,4694852833	FALSE	FALSE
BigCC100_18045	55	0,14	0,99	0,96	0,016616	1,92E-04	-3,20E-05	-0,03	-0,04439411936	NA	FALSE	FALSE
BigCC100_1805	42	0,13	1,01	0,99	0,01654	2,64E-04	4,00E-06	-0,02	-0,02885486267	-6,044394119	FALSE	FALSE
BigCC100_1806	86	0,13	1	0,98	0,016672	-1,00E-04	-1,52E-04	-0,02	-0,02914634566	0,6040713237	FALSE	FALSE
BigCC100_1807	258	0,15	1,03	0,99	0,01672	2,00E-05	3,60E-05	-0,04	-0,0571439071	0,8479969066	FALSE	FALSE
BigCC100_1808	294	0,15	1,02	0,97	0,016852	-4,00E-05	-3,20E-04	-0,05	-0,07251249978	3	FALSE	FALSE
BigCC100_1809	98	0,14	1	0,99	0,016548	1,56E-04	2,72E-04	-0,01	-0,0144995697	0,8020606224	FALSE	FALSE
BigCC100_181	1768	0,76	1,45	1,06	0,01684	0,0067	-3,04E-04	-0,39	-0,4519886355	NA	FALSE	FALSE
BigCC100_1810	88	0,12	1,01	1,01	0,016688	-1,00E-04	-2,00E-05	0	0	-2,321928095	FALSE	FALSE
BigCC100_18103	39	0,14	0,98	0,97	0,01658	7,20E-05	2,52E-04	-0,01	-0,01479700193	1,807354922	FALSE	FALSE
BigCC100_1811	105	0,14	1,01	0,97	0,016544	2,48E-04	2,88E-04	-0,04	-0,05829864056	0,2157286911	FALSE	FALSE
BigCC100_1812	156	0,14	1	0,97	0,016552	-1,20E-05	0	-0,03	-0,04394334759	-Inf	FALSE	FALSE
BigCC100_1813	113	0,14	1,02	1	0,016852	-2,40E-05	-2,60E-04	-0,02	-0,0285691522	3,437405312	FALSE	FALSE
BigCC100_1814	104	0,14	1	0,99	0,016692	-1,48E-04	1,12E-04	-0,01	-0,0144995697	NA	FALSE	FALSE
BigCC100_1815	86	0,14	1,01	0,96	0,016644	-2,00E-05	-6,00E-05	-0,05	-0,07324898203	1,584962501	FALSE	FALSE
BigCC100_18152	32	0,13	0,99	0,99	0,016824	-3,32E-04	-1,68E-04	0	0	-0,9827220086	FALSE	FALSE
BigCC100_1816	329	0,17	1,05	1,03	0,01672	-1,04E-04	8,80E-05	-0,02	-0,02774499048	NA	FALSE	FALSE
BigCC100_1817	108	0,14	1	0,97	0,01684	-3,24E-04	-2,96E-04	-0,03	-0,04394334759	-0,1303966373	FALSE	FALSE
BigCC100_1818	94	0,12	1,01	1	0,016544	1,48E-04	6,00E-05	-0,01	-0,01435529298	-1,30256277	FALSE	FALSE
BigCC100_1819	77	0,14	1	0,99	0,016836	-2,32E-04	-1,16E-04	-0,01	-0,0144995697	-1	FALSE	FALSE
BigCC100_182	4250	2,11	5,38	3,27	0,019284	0,073392	6,96E-04	-2,11	-0,7183155371	-6,720391696	FALSE	FALSE
BigCC100_1820	79	0,13	0,99	0,99	0,016812	-2,28E-04	-2,68E-04	0	0	0,2331991763	FALSE	FALSE
BigCC100_18204	169	0,14	1,01	1,01	0,016836	-4,00E-06	-3,00E-04	0	0	6,22881869	FALSE	FALSE
BigCC100_18205	43	0,12	1	0,99	0,016628	2,08E-04	-8,00E-05	-0,01	-0,0144995697	NA	FALSE	FALSE
BigCC100_18206	45	0,1	1,02	1,04	0,016548	1,92E-04	1,84E-04	0,02	0,02801437617	-0,06140054466	FALSE	FALSE
BigCC100_18208	33	0,13	1,01	0,99	0,016512	1,68E-04	4,00E-05	-0,02	-0,02885486267	-2,070389328	FALSE	FALSE
BigCC100_1822	31	0,12	1	0,97	0,01652	3,20E-04	2,12E-04	-0,03	-0,04394334759	-0,5940076403	FALSE	FALSE
BigCC100_18224	56	0,12	1	1	0,016604	1,36E-04	-1,60E-05	0	0	NA	FALSE	FALSE
BigCC100_1823	81	0,14	0,99	0,99	0,01684	-3,12E-04	-2,00E-05	0	0	-3,963474124	FALSE	FALSE
BigCC100_1824	165	0,13	1,01	0,98	0,016696	-1,76E-04	-1,52E-04	-0,03	-0,04350163864	-0,2115041052	FALSE	FALSE
BigCC100_1825	107	0,13	1,02	0,98	0,01676	6,80E-05	7,20E-05	-0,04	-0,05771549786	0,08246216019	FALSE	FALSE
BigCC100_1826	104	0,14	0,98	0,98	0,016692	-4,00E-06	-1,60E-04	0	0	5,321928095	FALSE	FALSE
BigCC100_1827	563	0,15	1,03	1,01	0,016812	-1,60E-04	0	-0,02	-0,02828904443	-Inf	FALSE	FALSE
BigCC100_18277	42	0,13	0,99	0,99	0,016824	2,40E-05	-4,00E-06	0	0	NA	FALSE	FALSE
BigCC100_18281	64	0,12	1,02	0,98	0,016836	-3,16E-04	-2,36E-04	-0,04	-0,05771549786	-0,4211376988	FALSE	FALSE
BigCC100_18299	32	0,12	1	1	0,016756	8,40E-05	3,60E-05	0	0	-1,222392421	FALSE	FALSE
BigCC100_183	2029	1,21	1,79	1,17	0,016744	0,013436	-1,52E-04	-0,62	-0,6134510577	NA	FALSE	FALSE
BigCC100_18300	51	0,13	0,99	0,99	0,016744	1,20E-05	3,20E-05	0	0	1,415037499	FALSE	FALSE
BigCC100_18305	36	0,12	1,02	1	0,016732	-2,12E-04	-1,00E-04	-0,02	-0,0285691522	-1,084064265	FALSE	FALSE
BigCC100_1831	57	0,14	0,98	0,97	0,016556	2,60E-04	1,00E-04	-0,01	-0,01479700193	-1,378511623	FALSE	FALSE
BigCC100_18316	38	0,12	1	1	0,016592	1,44E-04	1,96E-04	0	0	0,4447848427	FALSE	FALSE
BigCC100_1832	122	0,14	1,02	0,97	0,01654	-4,00E-06	3,04E-04	-0,05	-0,07251249978	NA	FALSE	FALSE
BigCC100_1833	101	0,14	0,99	0,97	0,016572	2,36E-04	2,80E-04	-0,02	-0,02944377789	0,2466399676	FALSE	FALSE
BigCC100_1835	36	0,12	1,01	1	0,016544	3,20E-05	2,68E-04	-0,01	-0,01435529298	3,06608919	FALSE	FALSE
BigCC100_1836	89	0,12	1,02	0,99	0,016748	-2,32E-04	7,20E-05	-0,03	-0,04306872189	NA	FALSE	FALSE
BigCC100_1837	117	0,13	1,03	1,01	0,016676	5,20E-05	-7,60E-05	-0,02	-0,02828904443	NA	FALSE	FALSE
BigCC100_1838	82	0,14	0,99	0,95	0,016556	1,40E-04	-8,00E-06	-0,04	-0,05950101175	NA	FALSE	FALSE
BigCC100_1839	95	0,13	1,01	0,98	0,01674	1,04E-04	-2,16E-04	-0,03	-0,04350163864	NA	FALSE	FALSE
BigCC100_184	1804	4,22	4,88	15,82	0,033392	0,017236	3,52E-04	10,94	1,696796547	-5,613705764	FALSE	FALSE
BigCC100_18406	33	0,11	1,01	0,98	0,016528	-8,00E-06	2,40E-05	-0,03	-0,04350163864	NA	FALSE	FALSE
BigCC100_1841	108	0,12	1	1,02	0,01684	-2,00E-05	-1,72E-04	0,02	0,0285691522	3,10433666	FALSE	FALSE
BigCC100_1843	88	0,12	1,02	1	0,016424	3,96E-04	4,16E-04	-0,02	-0,0285691522	0,07108309806	FALSE	FALSE
BigCC100_1844	92	0,13	1,01	1	0,0166	-6,40E-05	8,40E-05	-0,01	-0,01435529298	NA	FALSE	FALSE
BigCC100_1845	145	0,15	1,01	0,96	0,016704	-1,88E-04	3,60E-05	-0,05	-0,07324898203	NA	FALSE	FALSE
BigCC100_1846	48	0,12	1,01	0,98	0,016688	-1,72E-04	-4,00E-06	-0,03	-0,04350163864	-5,426264755	FALSE	FALSE
BigCC100_1847	168	0,14	1,01	1,02	0,016744	-1,36E-04	7,20E-05	0,01	0,01421385922	NA	FALSE	FALSE
BigCC100_18475	60	0,12	1	0,97	0,016824	-2,28E-04	-6,40E-05	-0,03	-0,04394334759	-1,832890014	FALSE	FALSE
BigCC100_1848	75	0,12	1,03	1,01	0,016832	-3,76E-04	-2,80E-05	-0,02	-0,02828904443	-3,74723393	FALSE	FALSE
BigCC100_1849	113	0,15	0,98	0,99	0,01644	3,04E-04	1,56E-04	0,01	0,01464677596	-0,9625252946	FALSE	FALSE
[truncated: 4,080 more rows]

## Sheet: shuffled Bac_n 2022_03
377629		list of shuffled uniprot bacteria proteome IDs (OX tag)
323273		the first 10 entries form the bac_10 set, the first 20 form the bac_20, and so on
29539		uniprot release 2022_03
258515
2026769
1889779
37923
2593973
525904
335541
381666
1898
2592652
2798724
1967502
435910
2486473
270368
39495
2486470
1076588
196162
1071918
1288494
1076124
1542737
185642
206665
337097
522319
1185766
1224318
1229726
289377
272560
1280941
2706888
573658
1263011
983548
171285
2502784
200120
1926491
435591
326424
1736322
442709
1716176
253703
1891920
145458
1043493
28088
171281
1312363
1121301
1004901
913325
1735670
764291
243159
2682977
1505597
1427518
2218525
1344003
1263016
2752307
58340
1981511
351215
2495581
1173020
1263078
29448
34002
1121923
2315727
314283
1032480
2026786
2662361
62763
28064
1343159
2480798
455344
1423778
314278
1029718
1689867
2026888
2602070
1955714
1166257
44252
207745
1120919
2690325
1173111
59203
1736343
1883414
2320083
2282421
980561
883111
385025
886293
1736487
869279
1304284
883067
1393034
1231350
452629
557557
943830
1808959
1701573
2705421
1053647
1121409
2487930
1912877
873513
83765
1188241
623281
189382
480391
350058
94869
1902245
748280
2692619
1114924
2070369
1086393
1987165
155865
245188
1286822
35761
1844469
1930276
46223
306537
2675850
936594
2200906
1179778
1481457
1919
1855348
1889770
1302242
2527980
2528009
1938339
2058346
585530
2479849
2662264
39831
643674
2690309
39695
1262828
2026763
444103
1965550
335020
2108365
1302376
1808979
290512
2567896
49278
1121325
396014
291179
1897630
1095777
552518
1965572
1348663
549
1678028
398580
2320109
1108045
626523
258594
390269
1115809
675090
490759
543527
1168039
2489173
2292283
1432552
1262452
520767
1335062
1262821
362948
640330
1001886
145857
401053
1736219
123214
913252
395019
700500
331679
398199
592031
2682091
1476466
1639118
709986
743720
744872
79604
1848616
267608
2557994
135569
1494959
2211140
992267
281362
765912
2576308
2036206
60547
2133958
1341692
343013
683316
930129
2067452
632
393303
588067
229920
357809
1472722
1262978
411475
587636
1268622
1685379
94136
1653850
1165841
2021234
1156985
1874826
156980
765698
1423738
28445
2485186
1286181
1114943
2719011
1200751
2591463
649756
543736
2137581
1921087
242231
2666298
1262839
349521
2602067
572419
1632019
389348
313596
1125712
407234
1262989
1681197
2762325
1343077
1547516
768706
1367847
2487931
2219696
1230341
2306975
29557
2184000
1881035
1121865
114686
1437817
580166
2068657
1537710
319501
479431
1268042
218208
444179
1285192
1901
706433
262723
493781
326298
2737536
575540
1262761
123899
113268
525898
2699430
859143
290317
251229
1351585
1242148
2021314
656914
1449348
2282154
2599308
1391653
1262706
2734634
121290
1138822
292564
1378168
1287488
2259133
47678
439529
1042984
1549858
2066022
2017
284043
2579935
1133546
877466
1263023
217068
2709382
644284
2301224
1453999
1147123
381764
1262787
431489
32049
1127673
386301
1348163
579484
1217799
858640
714109
2015571
548479
2609291
479117
2491045
1263100
393595
1463164
2571270
61644
1116391
1907941
2218524
1105367
1906324
1162296
1616788
1603606
215578
1119534
75695
1622073
986075
1881040
1508404
1538103
1978229
1235797
1736266
717605
2653142
2496558
421115
1860122
1437605
2597822
2528174
888057
1736350
1490290
2662446
1619308
272563
99594
392593
1703929
1079859
1924934
89187
290052
2594004
648782
1176646
1783274
154046
1262823
478749
1294273
767452
1581680
1121256
359131
69222
765913
1348662
1932666
1836467
2231112
1100724
1622118
1735683
1642702
2029117
2099795
2735870
694427
1034889
1945
2184016
413404
82979
1437444
2603819
2035410
1811193
675817
1671698
1544867
1703937
1300341
571932
352858
371602
2562655
45657
1640652
515622
572547
1387186
1476857
903503
331697
1736464
2509456
670079
632245
1940612
2169400
56427
2233851
1333996
2494560
203482
64702
2259619
1972867
446465
2610880
862135
2650750
1706046
1981098
190146
215803
272947
656744
396268
1434707
2728840
661485
2283384
184748
2571155
58109
1670660
103808
1855342
485916
714067
1799661
2509675
1891971
1812349
1628856
1736612
1263073
54
2721173
2342
2035418
2587837
2709302
570835
83332
142650
1300350
2799560
1520828
1817405
227084
960
1396819
1445510
157779
228410
2040638
638
85643
1486262
2723053
478744
2291815
1538639
314287
525328
1357399
545619
1888891
488731
2593649
314260
1262942
2602574
88274
2035429
1696036
2320110
2709403
1778262
442563
2016499
1262799
157838
1318617
2304196
627131
1855351
1359166
1971595
1331668
1621700
418702
2610898
230091
1262700
1736426
1977087
630515
1072256
997352
1855400
1701085
2690338
118110
1712379
1071718
2025950
1761880
1608628
2518176
1794944
1005944
2029983
445932
661483
2710884
2293570
2558360
453837
1112230
1166323
148604
2184346
1620215
2035411
280772
1907412
364197
1299328
1695997
2769490
1796618
417367
2003551
2292257
1324935
2615207
2697043
2035431
59748
2583849
1965622
1805827
2499157
1586267
1188247
302449
1577474
1504672
502682
35763
2608987
489703
2078691
1121015
2020875
1469144
1184267
1121881
2071627
2703788
1284222
1795631
999415
1276257
1437425
1264554
2015563
2292270
2736640
91464
1150368
1642040
1848320
291169
189873
517720
1576369
1714841
370038
2697030
552357
1395513
272129
1795827
2250574
396015
1930593
406432
1535768
529704
2749829
2014871
549386
2026885
1985173
2203200
1262955
2719006
947828
1868325
189
445972
1262958
2283626
2756
1123501
2698830
272942
669502
1702325
1526927
1850254
1313304
1462526
1324796
1123500
2499851
1121291
1393122
861298
1204385
71657
405555
1646377
1077947
288768
1742972
1355330
999419
413306
683042
2603660
1839774
2008318
1852021
713057
2741
471853
43775
2714738
1121326
2231787
290315
2651627
523696
1735686
1262749
1036182
264636
2676122
1121001
2590022
425511
197461
76728
686666
43989
321339
1220589
531844
1591409
2558278
357400
2683199
1675686
908627
1499107
2201181
595589
927668
1262937
1294270
941824
1262970
1969733
1673631
1277350
1122941
204773
192814
1121117
2058306
1048394
1423804
714531
1027273
1653207
2728022
979970
2161748
1236971
2571029
1236966
1302425
1394711
2485000
1559896
195088
43354
2559609
1720083
2303539
1262936
2728838
1073423
927661
985250
634771
1513271
1505
2143
1773489
1397112
2681972
1263625
1440053
1262881
2116655
2507582
759412
1262987
1720316
2293572
1133106
2172099
2562153
1930274
1262585
110539
857417
1505037
47500
36874
169765
588602
2656650
2511171
617002
2709304
1520826
2552982
1679168
458
2712223
1736674
2571148
281105
1510460
252514
2495421
1915388
441119
2512155
475662
2293102
1798182
126673
36816
883114
2292766
1736587
1263068
1408103
670487
2591470
1125718
2562294
2607660
2056433
1914755
1250059
433323
927669
744406
1519492
114885
633149
2292053
937450
435830
1536651
673521
1158606
1262554
2040648
1434829
543615
1218173
1203610
1504
1735693
569857
1122208
1231351
2690254
1385625
2770322
1160
398578
2603275
2562891
194197
658086
1867719
360105
2320104
1048205
2585369
550983
512565
1415557
1708751
2094151
2594428
2211142
1185325
195064
1581557
380911
2217664
2093742
1336796
1827365
1891289
1423792
1221520
690417
1945890
1977910
1642303
2487710
2489054
84035
1303518
2528630
2107713
1176176
1262829
1165094
631454
888050
2589797
937777
66430
2364879
521158
1792508
1445552
338966
546874
404875
1206336
178339
1523621
1452450
1031538
76022
2742145
337250
412449
1867410
1517683
2175649
2014874
2491049
316278
1719126
29536
929704
667129
342950
2572245
483423
2478663
1891921
1811386
1262917
2597823
2678688
1262758
249408
1803916
320497
2665159
284577
81460
1276221
102897
43355
1906740
1521930
1449351
553973
675813
1796636
1075417
1736474
1499688
2787628
1457233
388413
1547578
1262832
1857892
2653201
1761803
433330
53432
69962
1753
1485217
2676868
1834117
1429439
2082193
1231392
2030824
2077091
2496639
454133
1261634
217090
1448271
441500
225004
1049564
1262803
252393
13276
171101
1489678
1653480
1219077
1209989
1123323
1005999
1208583
589035
545694
2759954
2572881
195913
1907416
2792603
2048654
66876
2690310
1391627
446470
319652
931626
76726
85962
728004
398767
425513
1267768
1261633
2136175
1380685
352211
2728023
2482727
2014804
664640
1965558
1263870
666702
2024612
1227551
1300345
549003
1470176
1655435
2761101
1385510
1121950
630514
1932778
69670
692036
2320102
1776384
1912897
521096
1712516
1838286
2578118
2678504
1123352
1867956
139438
1262781
648757
694435
909943
2668067
1855383
485917
1842495
572010
1216886
475255
416213
1321816
1544413
1408226
457429
284581
2562278
1379858
1704499
415222
446462
598652
446469
688245
342451
2662447
1457365
1484053
1121955
214888
1882750
243231
1670800
1798205
43770
353852
690850
754423
207954
1631356
1445661
634500
1189304
1229268
135739
572480
1799655
1121324
1978525
2583587
2024554
1088721
1736522
1200747
2603204
83619
364199
1965604
1795630
1693
2572036
1881061
611302
1764958
57043
1341695
293826
2742195
713053
2563102
346911
1117987
1913577
64969
499207
1712380
415747
2741721
915472
517418
1921566
2033499
1428652
237018
1907408
2163881
997355
1208922
84531
1134406
1247510
1503981
685828
77133
521392
1966466
2211139
1423815
686429
2560059
1031537
1904969
1703343
1420851
1121898
68170
2015577
2483361
1872138
2497686
158822
1348853
1690483
394506
1233460
1262907
1891926
2035409
871271
2320081
172042
2528005
1423729
1476196
188932
200124
662755
1742724
186479
1520819
28161
1262686
1834198
217168
1002809
1552750
1096750
1262831
1937191
2283160
2709311
626522
1263017
1343867
1121306
1510026
1981099
400055
229205
708091
2079008
745310
1317122
1632867
1285928
2056856
1070319
2662258
1365250
930171
133720
123320
762967
2600309
1122155
1469647
272632
2507060
2654547
1681196
187490
936556
1383885
2036016
1799662
1736289
1121279
463044
1855283
1641811
1718947
630520
2491057
1423727
1840703
887898
1517416
664693
1517760
433924
82985
584609
630626
1629334
2675053
411467
1803372
1356852
2017484
2116544
1262880
1382466
1125779
1627892
1629062
1859131
946573
1778438
2024220
1406840
909613
1064535
1346
1203562
496056
758825
299255
2020949
1968433
1798805
2528011
1761906
2304605
888056
29563
2488860
53501
417292
585394
2492960
1465490
742814
2249812
2762277
2133944
2562683
1678129
1881045
487797
2065189
2772253
1915074
634994
472055
1492898
2029982
1898203
2294034
1263061
2699483
1736282
158787
1592727
589873
1592629
1386089
1181884
1332264
2109915
2033437
1195246
331648
29391
2024223
1121025
693444
402881
2042961
1262927
2582917
2654998
685
1005995
1423726
947516
2044944
1844972
1620421
997347
74426
871651
35841
1359168
2710922
2530372
1299998
1229781
270498
697281
85336
497321
2756294
2169414
370736
883169
768700
1329909
1149773
1524097
2293125
1262692
2035423
2026184
197479
2041385
2015573
1265313
272621
1799789
2035405
1776083
2035419
1379910
2480627
56731
2706073
2545760
1977908
34017
1229727
2137476
1318466
45254
759914
2527873
1627895
2594477
1385594
645617
1526735
1645681
947835
1262944
548476
1571833
1200993
2584524
1635173
2651839
1406431
1564506
1237149
1639689
1339210
2510794
2315800
980445
1914305
2653204
260086
1736232
512564
682400
993416
1321778
1050370
1356854
1894989
96942
2494375
83334
68214
1239962
1423820
361183
1262871
752555
504486
2293108
2552983
872330
687388
1842533
1385517
35806
1577792
376733
2320112
40754
2303751
1520830
1121362
568872
887062
2691042
1727164
908338
2723089
57032
1820333
637886
1144618
1736475
455193
2183582
60216
2518371
1761888
2587834
198628
872965
661478
320771
529884
1458307
268407
2724525
568106
664692
883096
265959
1121476
28159
2497989
304378
1965618
395965
465541
537971
354351
1150626
2738
2613962
226186
2754725
1262690
29408
1434700
945734
2065820
1073327
2488809
1628250
863227
990288
1385520
1078050
2745851
1026882
880071
381308
35622
350
1523427
1965571
2174842
317018
61651
680646
47847
1882734
1348253
2035420
1908241
311410
2541728
1409788
1235809
2707344
748247
2212467
2527995
933063
2173174
486698
2479857
2293174
2528003
709032
555779
1965549
287099
2045441
1262815
1323422
2596915
573600
754426
1246484
1928331
657313
582899
414684
2559606
536227
2052660
1656889
1763538
1932695
2561920
1907397
1588751
1882832
1262908
1851146
142651
1736603
553184
1792307
663364
1226633
1172194
59920
2305225
676965
1450156
1128970
351605
2200908
1736351
1124982
1168287
2307003
2518645
1825523
525280
2650774
1262953
1276920
1520811
1904640
1287727
1703345
2585118
1263002
1610491
391922
1799653
1932621
1850250
161355
637910
74547
360411
2015578
1917218
1262813
2510111
1317124
2498109
2546320
1736381
2030927
1458461
344747
2587029
2583578
356322
82348
1281767
1862358
2584666
1123350
1641875
218495
1778590
1341694
2664430
1193007
2590900
323412
472582
1449336
1460635
1897632
75385
1384049
2607602
570281
1706840
1605891
1850252
1523413
1523424
2509458
2486475
1537566
2758565
1796628
1262891
1881068
1736501
266265
1234595
2021362
2292706
479432
1490030
235279
1968597
1880991
1880902
2047982
1545728
1739394
684719
1044
1259182
1263030
2083786
2282215
111806
300028
2597517
252967
2741497
1684789
2339232
589865
537013
1392540
2744523
1514904
2740405
2488810
2305467
260552
2590015
2735303
2035426
1262748
883113
1348338
429344
555088
1519190
1926494
598644
797291
2528002
2559571
283942
1346330
93369
1403537
447679
1121266
1882831
2049319
2202420
757424
1263035
1914406
340320
929705
454
1213861
536441
285458
1736595
2056849
229921
1766620
2079009
183763
938405
1564138
1263004
2587839
1096856
1566282
1241337
1077255
1494590
2593301
208964
1324314
1703942
1484056
2107700
1399147
1316414
1501230
2015564
2528010
63
643052
1130798
169134
2133960
34059
1736333
1537215
439699
1564681
490629
185761
1799658
32013
633440
1033731
2567942
2030806
1784712
574376
546271
395495
1250295
134676
1121390
2045440
1912795
421628
392423
1121448
1005395
388408
621372
131109
1356306
929558
1739113
47857
2082395
1547922
682979
2292364
577650
261392
1056496
147207
2184341
1621989
330214
536979
471881
551996
1706195
945021
1527299
1333857
247490
1604834
1798186
331113
1658742
1389004
696760
1608583
1565605
153494
137658
87458
562970
1454004
2716225
2479851
655811
2135643
2518370
1473
279360
1579333
60549
1798803
648780
306545
497964
1940533
890399
33879
83291
1678012
1121939
1184151
2026785
1550235
1245441
454136
1581050
2486264
224308
1985879
665007
1880855
661481
1262708
387344
1007105
1294268
2726738
1115512
1045776
1909293
1288362
1115757
218144
2608384
1262789
2565934
2785025
742742
1121014
1315998
259536
411464
1450648
273677
2597701
261654
1801629
2292272
621456
2212474
1183438
2726741
1395944
1917182
1877
889453
99287
2530367
225999
1235792
433647
2016198
2565930
1232430
1332285
161895
1415657
467705
1612202
591159
1348774
1961794
861299
1387779
2315464
735332
2682548
1652492
110319
2712222
1337887
1524263
2065379
2744574
1081644
1689449
2714930
632518
1123243
2760088
1127692
43662
1158289
2080658
1911586
1690485
2664451
1748249
2779519
2161813
2714944
1854586
388399
700599
360412
2508721
698960
2003592
272561
331869
665118
856793
437022
2135627
42881
40520
2419777
2489174
1159016
2035415
2552984
2590199
1123357
103836
314266
1633200
53446
1263003
28128
1118153
1387883
1940762
556269
2741701
1520816
2528966
1635327
1042404
1494608
706434
476281
2569542
1572751
442528
2527998
110845
290340
765910
927083
78344
1736539
557436
698986
579483
536
2509717
1851577
2419782
2710758
1432792
1121270
1121322
2303421
882378
1903686
2230885
754417
290338
151081
[truncated: 6,623 more rows]

## Sheet: BigCC  dataset
GCF_000005825.2_ASM582v2
GCF_000005845.2_ASM584v2
GCF_000006605.1_ASM660v1
GCF_000006625.1_ASM662v1
GCF_000006645.1_ASM664v1
GCF_000006685.1_ASM668v1
GCF_000006725.1_ASM672v1
GCF_000006745.1_ASM674v1
GCF_000006765.1_ASM676v1
GCF_000006785.2_ASM678v2
GCF_000006825.1_ASM682v1
GCF_000006845.1_ASM684v1
GCF_000006865.1_ASM686v1
GCF_000006885.1_ASM688v1
GCF_000006905.1_ASM690v1
GCF_000006925.2_ASM692v2
GCF_000006945.1_ASM694v1
GCF_000006965.1_ASM696v1
GCF_000006985.1_ASM698v1
GCF_000007025.1_ASM702v1
GCF_000007085.1_ASM708v1
GCF_000007105.1_ASM710v1
GCF_000007125.1_ASM712v1
GCF_000007145.1_ASM714v1
GCF_000007165.1_ASM716v1
GCF_000007205.1_ASM720v1
GCF_000007265.1_ASM726v1
GCF_000007325.1_ASM732v1
GCF_000007365.1_ASM736v1
GCF_000007385.1_ASM738v1
GCF_000007465.2_ASM746v2
GCF_000007485.1_ASM748v1
GCF_000007505.1_ASM750v1
GCF_000007525.1_ASM752v1
GCF_000007565.1_ASM756v1
GCF_000007585.1_ASM758v1
GCF_000007605.1_ASM760v1
GCF_000007625.1_ASM762v1
GCF_000007645.1_ASM764v1
GCF_000007665.1_ASM766v1
GCF_000007685.1_ASM768v1
GCF_000007705.1_ASM770v1
GCF_000007745.1_ASM774v1
GCF_000007765.1_ASM776v1
GCF_000007785.1_ASM778v1
GCF_000007805.1_ASM780v1
GCF_000007825.1_ASM782v1
GCF_000007845.1_ASM784v1
GCF_000007865.1_ASM786v1
GCF_000007905.1_ASM790v1
GCF_000007925.1_ASM792v1
GCF_000007945.1_ASM794v1
GCF_000007985.2_ASM798v2
GCF_000008025.1_ASM802v1
GCF_000008045.1_ASM804v1
GCF_000008065.1_ASM806v1
GCF_000008125.1_ASM812v1
GCF_000008145.1_ASM814v1
GCF_000008185.1_ASM818v1
GCF_000008205.1_ASM820v1
GCF_000008245.1_ASM824v1
GCF_000008285.1_ASM828v1
GCF_000008305.1_ASM830v1
GCF_000008325.1_ASM832v1
GCF_000008345.1_ASM834v1
GCF_000008365.1_ASM836v1
GCF_000008385.1_ASM838v1
GCF_000008425.1_ASM842v1
GCF_000008465.1_ASM846v1
GCF_000008485.1_ASM848v1
GCF_000008505.1_ASM850v1
GCF_000008525.1_ASM852v1
GCF_000008545.1_ASM854v1
GCF_000008565.1_ASM856v1
GCF_000008585.1_ASM858v1
GCF_000008605.1_ASM860v1
GCF_000008625.1_ASM862v1
GCF_000008685.2_ASM868v2
GCF_000008725.1_ASM872v1
GCF_000008765.1_ASM876v1
GCF_000008805.1_ASM880v1
GCF_000008885.1_ASM888v1
GCF_000008925.1_ASM892v1
GCF_000008985.1_ASM898v1
GCF_000009005.1_ASM900v1
GCF_000009025.1_ASM902v1
GCF_000009045.1_ASM904v1
GCF_000009085.1_ASM908v1
GCF_000009125.1_ASM912v1
GCF_000009145.1_ASM914v1
GCF_000009165.1_ASM916v1
GCF_000009205.1_ASM920v1
GCF_000009225.2_ASM922v1
GCF_000009265.1_ASM926v1
GCF_000009285.1_ASM928v2
GCF_000009305.1_ASM930v1
GCF_000009345.1_ASM934v1
GCF_000009365.1_ASM936v1
GCF_000009405.1_ASM940v1
GCF_000009445.1_ASM944v1
GCF_000009485.1_ASM948v1
GCF_000009545.1_ASM954v1
GCF_000009625.1_ASM962v1
GCF_000009685.1_ASM968v1
GCF_000009705.1_ASM970v1
GCF_000009745.1_ASM974v1
GCF_000009765.1_ASM976v1
GCF_000009785.1_ASM978v1
GCF_000009805.1_ASM980v1
GCF_000009825.1_ASM982v1
GCF_000009845.1_ASM984v1
GCF_000009865.1_ASM986v1
GCF_000009885.1_ASM988v1
GCF_000009905.1_ASM990v1
GCF_000009925.1_ASM992v1
GCF_000009945.1_ASM994v1
GCF_000009985.1_ASM998v1
GCF_000010005.1_ASM1000v1
GCF_000010045.1_ASM1004v1
GCF_000010065.1_ASM1006v1
GCF_000010085.1_ASM1008v1
GCF_000010105.1_ASM1010v1
GCF_000010125.1_ASM1012v1
GCF_000010145.1_ASM1014v1
GCF_000010165.1_ASM1016v1
GCF_000010185.1_ASM1018v1
GCF_000010205.1_ASM1020v1
GCF_000010225.1_ASM1022v1
GCF_000010265.1_ASM1026v1
GCF_000010285.1_ASM1028v1
GCF_000010305.1_ASM1030v1
GCF_000010325.1_ASM1032v1
GCF_000010345.1_ASM1034v1
GCF_000010405.1_ASM1040v1
GCF_000010425.1_ASM1042v1
GCF_000010525.1_ASM1052v1
GCF_000010545.1_ASM1054v1
GCF_000010585.1_ASM1058v1
GCF_000010605.1_ASM1060v1
GCF_000010625.1_ASM1062v1
GCF_000010645.1_ASM1064v1
GCF_000010665.1_ASM1066v1
GCF_000010705.1_ASM1070v1
GCF_000010725.1_ASM1072v1
GCF_000010785.1_ASM1078v1
GCF_000010805.1_ASM1080v1
GCF_000010825.1_ASM1082v1
GCF_000010985.1_ASM1098v1
GCF_000011025.1_ASM1102v1
GCF_000011045.1_ASM1104v1
GCF_000011065.1_ASM1106v1
GCF_000011145.1_ASM1114v1
GCF_000011225.1_ASM1122v1
GCF_000011245.1_ASM1124v1
GCF_000011305.1_ASM1130v1
GCF_000011345.1_ASM1134v1
GCF_000011365.1_ASM1136v1
GCF_000011385.1_ASM1138v1
GCF_000011445.1_ASM1144v1
GCF_000011545.1_ASM1154v1
GCF_000011605.1_ASM1160v1
GCF_000011685.1_ASM1168v1
GCF_000011705.1_ASM1170v1
GCF_000011745.1_ASM1174v1
GCF_000011785.1_ASM1178v1
GCF_000011805.1_ASM1180v1
GCF_000011825.1_ASM1182v1
GCF_000011945.1_ASM1194v1
GCF_000011965.2_ASM1196v2
GCF_000011985.1_ASM1198v1
GCF_000012005.1_ASM1200v1
GCF_000012025.1_ASM1202v1
GCF_000012085.1_ASM1208v1
GCF_000012145.1_ASM1214v1
GCF_000012185.1_ASM1218v1
GCF_000012205.1_ASM1220v1
GCF_000012225.1_ASM1222v1
GCF_000012245.1_ASM1224v1
GCF_000012265.1_ASM1226v1
GCF_000012305.1_ASM1230v1
GCF_000012325.1_ASM1232v1
GCF_000012345.1_ASM1234v1
GCF_000012365.1_ASM1236v1
GCF_000012385.1_ASM1238v1
GCF_000012405.1_ASM1240v1
GCF_000012425.1_ASM1242v1
GCF_000012485.1_ASM1248v1
GCF_000012565.1_ASM1256v1
GCF_000012585.1_ASM1258v1
GCF_000012605.1_ASM1260v1
GCF_000012625.1_ASM1262v1
GCF_000012665.1_ASM1266v1
GCF_000012685.1_ASM1268v1
GCF_000012725.1_ASM1272v1
GCF_000012745.1_ASM1274v1
GCF_000012765.1_ASM1276v1
GCF_000012805.1_ASM1280v1
GCF_000012825.1_ASM1282v1
GCF_000012845.1_ASM1284v1
GCF_000012865.1_ASM1286v1
GCF_000012885.1_ASM1288v1
GCF_000012925.1_ASM1292v1
GCF_000012945.1_ASM1294v1
GCF_000012965.1_ASM1296v1
GCF_000012985.1_ASM1298v1
GCF_000013005.1_ASM1300v1
GCF_000013025.1_ASM1302v1
GCF_000013045.1_ASM1304v1
GCF_000013085.1_ASM1308v1
GCF_000013105.1_ASM1310v1
GCF_000013125.1_ASM1312v1
GCF_000013145.1_ASM1314v1
GCF_000013165.1_ASM1316v1
GCF_000013185.1_ASM1318v1
GCF_000013205.1_ASM1320v1
GCF_000013325.1_ASM1332v1
GCF_000013345.1_ASM1334v1
GCF_000013365.1_ASM1336v1
GCF_000013385.1_ASM1338v1
GCF_000013405.1_ASM1340v1
GCF_000013565.1_ASM1356v1
GCF_000013605.1_ASM1360v1
GCF_000013625.1_ASM1362v1
GCF_000013645.1_ASM1364v1
GCF_000013665.1_ASM1366v1
GCF_000013705.1_ASM1370v1
GCF_000013765.1_ASM1376v1
GCF_000013785.1_ASM1378v1
GCF_000013865.1_ASM1386v1
GCF_000013885.1_ASM1388v1
GCF_000013905.1_ASM1390v1
GCF_000013945.1_ASM1394v1
GCF_000013985.1_ASM1398v1
GCF_000014005.1_ASM1400v1
GCF_000014025.1_ASM1402v1
GCF_000014045.1_ASM1404v1
GCF_000014065.1_ASM1406v1
GCF_000014125.1_ASM1412v1
GCF_000014145.1_ASM1414v1
GCF_000014165.1_ASM1416v1
GCF_000014185.1_ASM1418v1
GCF_000014205.1_ASM1420v1
GCF_000014225.1_ASM1422v1
GCF_000014245.1_ASM1424v1
GCF_000014265.1_ASM1426v1
GCF_000014285.1_ASM1428v1
GCF_000014345.1_ASM1434v1
GCF_000014385.1_ASM1438v1
GCF_000014405.1_ASM1440v1
GCF_000014425.1_ASM1442v1
GCF_000014445.1_ASM1444v1
GCF_000014465.1_ASM1446v1
GCF_000014505.1_ASM1450v1
GCF_000014525.1_ASM1452v1
GCF_000014565.1_ASM1456v1
GCF_000014585.1_ASM1458v1
GCF_000014685.1_ASM1468v1
GCF_000014705.1_ASM1470v1
GCF_000014725.1_ASM1472v1
GCF_000014745.1_ASM1474v1
GCF_000014765.1_ASM1476v1
GCF_000014785.1_ASM1478v1
GCF_000014805.1_ASM1480v1
GCF_000014865.1_ASM1486v1
GCF_000014885.1_ASM1488v1
GCF_000014905.1_ASM1490v1
GCF_000014925.1_ASM1492v1
GCF_000014965.1_ASM1496v1
GCF_000015005.1_ASM1500v1
GCF_000015025.1_ASM1502v1
GCF_000015045.1_ASM1504v1
GCF_000015065.1_ASM1506v1
GCF_000015085.1_ASM1508v1
GCF_000015105.1_ASM1510v1
GCF_000015125.1_ASM1512v1
GCF_000015165.1_ASM1516v1
GCF_000015185.1_ASM1518v1
GCF_000015245.1_ASM1524v1
GCF_000015265.1_ASM1526v1
GCF_000015285.1_ASM1528v1
GCF_000015305.1_ASM1530v1
GCF_000015325.1_ASM1532v1
GCF_000015345.1_ASM1534v1
GCF_000015365.1_ASM1536v1
GCF_000015385.1_ASM1538v1
GCF_000015405.1_ASM1540v1
GCF_000015445.1_ASM1544v1
GCF_000015485.1_ASM1548v1
GCF_000015505.1_ASM1550v1
GCF_000015545.1_ASM1554v1
GCF_000015565.1_ASM1556v1
GCF_000015585.1_ASM1558v1
GCF_000015725.1_ASM1572v1
GCF_000015745.1_ASM1574v1
GCF_000015785.1_ASM1578v1
GCF_000015845.1_ASM1584v1
GCF_000015865.1_ASM1586v1
GCF_000015885.1_ASM1588v1
GCF_000015985.1_ASM1598v1
GCF_000016065.1_ASM1606v1
GCF_000016085.1_ASM1608v1
GCF_000016165.1_ASM1616v1
GCF_000016185.1_ASM1618v1
GCF_000016205.1_ASM1620v1
GCF_000016265.1_ASM1626v1
GCF_000016285.1_ASM1628v1
GCF_000016325.1_ASM1632v1
GCF_000016345.1_ASM1634v1
GCF_000016365.1_ASM1636v1
GCF_000016425.1_ASM1642v1
GCF_000016545.1_ASM1654v1
GCF_000016565.1_ASM1656v1
GCF_000016585.1_ASM1658v1
GCF_000016625.1_ASM1662v1
GCF_000016645.1_ASM1664v1
GCF_000016665.1_ASM1666v1
GCF_000016725.1_ASM1672v1
GCF_000016745.1_ASM1674v1
GCF_000016765.1_ASM1676v1
GCF_000016785.1_ASM1678v1
GCF_000016845.1_ASM1684v1
GCF_000016885.1_ASM1688v1
GCF_000016905.1_ASM1690v1
GCF_000016945.1_ASM1694v1
GCF_000016965.1_ASM1696v1
GCF_000016985.1_ASM1698v1
GCF_000017005.1_ASM1700v1
GCF_000017025.1_ASM1702v1
GCF_000017145.1_ASM1714v1
GCF_000017245.1_ASM1724v1
GCF_000017265.1_ASM1726v1
GCF_000017285.1_ASM1728v1
GCF_000017305.1_ASM1730v1
GCF_000017405.1_ASM1740v1
GCF_000017425.1_ASM1742v1
GCF_000017445.4_ASM1744v3
GCF_000017465.1_ASM1746v1
GCF_000017505.1_ASM1750v1
GCF_000017545.1_ASM1754v1
GCF_000017565.1_ASM1756v1
GCF_000017585.1_ASM1758v1
GCF_000017605.1_ASM1760v1
GCF_000017645.1_ASM1764v1
GCF_000017665.1_ASM1766v1
GCF_000017705.1_ASM1770v1
GCF_000017725.1_ASM1772v1
GCF_000017805.1_ASM1780v1
GCF_000017845.1_ASM1784v1
GCF_000017865.1_ASM1786v1
GCF_000017885.2_ASM1788v2
GCF_000018005.1_ASM1800v1
GCF_000018025.1_ASM1802v1
GCF_000018045.1_ASM1804v1
GCF_000018085.1_ASM1808v1
GCF_000018105.1_ASM1810v1
GCF_000018145.1_ASM1814v1
GCF_000018185.1_ASM1818v1
GCF_000018205.1_ASM1820v1
GCF_000018265.1_ASM1826v1
GCF_000018285.1_ASM1828v1
GCF_000018325.1_ASM1832v1
GCF_000018345.1_ASM1834v1
GCF_000018405.1_ASM1840v1
GCF_000018425.1_ASM1842v1
GCF_000018445.1_ASM1844v1
GCF_000018525.1_ASM1852v1
GCF_000018545.1_ASM1854v1
GCF_000018605.1_ASM1860v1
GCF_000018665.1_ASM1866v1
GCF_000018685.1_ASM1868v1
GCF_000018785.1_ASM1878v1
GCF_000018825.1_ASM1882v1
GCF_000018845.1_ASM1884v1
GCF_000018865.1_ASM1886v1
GCF_000018885.1_ASM1888v1
GCF_000018945.1_ASM1894v1
GCF_000019045.1_ASM1904v1
GCF_000019065.1_ASM1906v1
GCF_000019085.1_ASM1908v1
GCF_000019145.1_ASM1914v1
GCF_000019165.1_ASM1916v1
GCF_000019185.1_ASM1918v1
GCF_000019205.1_ASM1920v1
GCF_000019225.1_ASM1922v1
GCF_000019245.4_ASM1924v3
GCF_000019285.1_ASM1928v1
GCF_000019365.1_ASM1936v1
GCF_000019485.1_ASM1948v1
GCF_000019525.1_ASM1952v1
GCF_000019665.1_ASM1966v1
GCF_000019685.1_ASM1968v1
GCF_000019705.1_ASM1970v1
GCF_000019725.1_ASM1972v1
GCF_000019785.1_ASM1978v1
GCF_000019845.1_ASM1984v1
GCF_000019905.1_ASM1990v1
GCF_000019925.1_ASM1992v1
GCF_000019945.1_ASM1994v1
GCF_000019965.1_ASM1996v1
GCF_000020005.1_ASM2000v1
GCF_000020025.1_ASM2002v1
GCF_000020045.1_ASM2004v1
GCF_000020065.1_ASM2006v1
GCF_000020125.1_ASM2012v1
GCF_000020145.1_ASM2014v1
GCF_000020205.1_ASM2020v1
GCF_000020225.1_ASM2022v1
GCF_000020265.1_ASM2026v1
GCF_000020325.1_ASM2032v1
GCF_000020365.1_ASM2036v1
GCF_000020385.1_ASM2038v1
GCF_000020465.1_ASM2046v1
GCF_000020485.1_ASM2048v1
GCF_000020505.1_ASM2050v1
GCF_000020525.1_ASM2052v1
GCF_000020565.1_ASM2056v1
GCF_000020585.3_ASM2058v3
GCF_000020605.1_ASM2060v1
GCF_000020625.1_ASM2062v1
GCF_000020645.1_ASM2064v1
GCF_000020665.1_ASM2066v1
GCF_000020685.1_ASM2068v1
GCF_000020725.1_ASM2072v1
GCF_000020765.1_ASM2076v1
GCF_000020785.1_ASM2078v1
GCF_000020805.1_ASM2080v1
GCF_000020825.1_ASM2082v1
GCF_000020865.1_ASM2086v1
GCF_000020945.1_ASM2094v1
GCF_000020965.1_ASM2096v1
GCF_000020985.1_ASM2098v1
GCF_000021025.1_ASM2102v1
GCF_000021045.1_ASM2104v1
GCF_000021265.1_ASM2126v1
GCF_000021285.1_ASM2128v1
GCF_000021325.1_ASM2132v1
GCF_000021365.1_ASM2136v1
GCF_000021425.1_ASM2142v1
GCF_000021545.1_ASM2154v1
GCF_000021565.1_ASM2156v1
GCF_000021645.1_ASM2164v1
GCF_000021685.1_ASM2168v1
GCF_000021725.1_ASM2172v1
GCF_000021745.1_ASM2174v1
GCF_000021765.1_ASM2176v1
GCF_000021805.1_ASM2180v1
GCF_000021825.1_ASM2182v1
GCF_000021865.1_ASM2186v1
GCF_000021885.1_ASM2188v1
GCF_000021905.1_ASM2190v1
GCF_000021945.1_ASM2194v1
GCF_000021985.1_ASM2198v1
GCF_000022025.1_ASM2202v1
GCF_000022045.1_ASM2204v1
GCF_000022065.1_ASM2206v1
GCF_000022085.1_ASM2208v1
GCF_000022105.1_ASM2210v1
GCF_000022125.1_ASM2212v1
GCF_000022185.1_ASM2218v1
GCF_000022265.1_ASM2226v1
GCF_000022285.1_ASM2228v1
GCF_000022305.1_ASM2230v1
GCF_000022325.1_ASM2232v1
GCF_000022525.1_ASM2252v1
GCF_000022565.1_ASM2256v1
GCF_000022605.2_ASM2260v1
GCF_000022645.2_ASM2264v1
GCF_000022725.1_ASM2272v1
GCF_000022745.1_ASM2274v1
GCF_000022785.1_ASM2278v1
GCF_000022885.2_ASM2288v2
GCF_000022905.1_ASM2290v1
GCF_000022985.1_ASM2298v1
GCF_000023005.1_ASM2300v1
GCF_000023025.1_ASM2302v1
GCF_000023045.1_ASM2304v1
GCF_000023065.1_ASM2306v1
GCF_000023085.1_ASM2308v1
GCF_000023105.1_ASM2310v1
GCF_000023125.1_ASM2312v1
GCF_000023145.1_ASM2314v1
GCF_000023205.1_ASM2320v1
GCF_000023225.1_ASM2322v1
GCF_000023245.1_ASM2324v1
GCF_000023265.1_ASM2326v1
GCF_000023285.1_ASM2328v1
GCF_000023325.1_ASM2332v1
GCF_000023345.1_ASM2334v1
GCF_000023385.1_ASM2338v1
GCF_000023405.1_ASM2340v1
GCF_000023445.1_ASM2344v1
GCF_000023465.1_ASM2346v1
GCF_000023585.1_ASM2358v1
GCF_000023605.1_ASM2360v1
GCF_000023705.1_ASM2370v1
GCF_000023725.1_ASM2372v1
GCF_000023745.1_ASM2374v1
GCF_000023785.1_ASM2378v1
GCF_000023825.1_ASM2382v1
GCF_000023845.1_ASM2384v1
GCF_000023865.1_ASM2386v1
GCF_000023885.1_ASM2388v1
GCF_000023905.1_ASM2390v1
GCF_000023925.1_ASM2392v1
GCF_000024005.1_ASM2400v1
GCF_000024025.1_ASM2402v1
GCF_000024065.1_ASM2406v1
GCF_000024085.1_ASM2408v1
GCF_000024105.1_ASM2410v1
GCF_000024125.1_ASM2412v1
GCF_000024165.1_ASM2416v1
GCF_000024205.1_ASM2420v1
GCF_000024225.1_ASM2422v1
GCF_000024265.1_ASM2426v1
GCF_000024285.1_ASM2428v1
GCF_000024325.1_ASM2432v1
GCF_000024345.1_ASM2434v1
GCF_000024365.1_ASM2436v1
GCF_000024385.1_ASM2438v1
GCF_000024405.1_ASM2440v1
GCF_000024425.1_ASM2442v1
GCF_000024445.1_ASM2444v1
GCF_000024465.1_ASM2446v1
GCF_000024505.1_ASM2450v1
GCF_000024545.1_ASM2454v1
GCF_000024565.1_ASM2456v1
GCF_000024605.1_ASM2460v1
GCF_000024645.1_ASM2464v1
GCF_000024665.1_ASM2466v1
GCF_000024685.1_ASM2468v1
GCF_000024705.1_ASM2470v1
GCF_000024725.1_ASM2472v1
GCF_000024765.1_ASM2476v1
GCF_000024785.1_ASM2478v1
GCF_000024805.1_ASM2480v1
GCF_000024825.1_ASM2482v1
GCF_000024845.1_ASM2484v1
GCF_000024865.1_ASM2486v1
GCF_000024885.1_ASM2488v1
GCF_000024905.1_ASM2490v1
GCF_000024925.1_ASM2492v1
GCF_000024945.1_ASM2494v1
GCF_000024965.1_ASM2496v1
GCF_000024985.1_ASM2498v1
GCF_000025005.1_ASM2500v1
GCF_000025065.1_ASM2506v1
GCF_000025085.1_ASM2508v1
GCF_000025105.1_ASM2510v1
GCF_000025125.1_ASM2512v1
GCF_000025185.1_ASM2518v1
GCF_000025205.1_ASM2520v1
GCF_000025225.2_ASM2522v1
GCF_000025265.1_ASM2526v1
GCF_000025305.1_ASM2530v1
GCF_000025345.1_ASM2534v1
GCF_000025365.1_ASM2536v1
GCF_000025405.2_ASM2540v1
GCF_000025465.1_ASM2546v1
GCF_000025485.1_ASM2548v1
GCF_000025545.1_ASM2554v1
GCF_000025565.1_ASM2556v1
GCF_000025605.1_ASM2560v1
GCF_000025645.1_ASM2564v1
GCF_000025705.1_ASM2570v1
GCF_000025725.1_ASM2572v1
GCF_000025805.1_ASM2580v1
GCF_000025845.1_ASM2584v1
GCF_000025885.1_ASM2588v1
GCF_000025905.1_ASM2590v1
GCF_000025925.1_ASM2592v1
GCF_000025945.1_ASM2594v1
GCF_000025965.1_ASM2596v1
GCF_000026005.1_ASM2600v1
GCF_000026025.1_ASM2602v1
GCF_000026065.1_ASM2606v1
GCF_000026085.1_ASM2608v1
GCF_000026105.1_ASM2610v1
GCF_000026125.1_ASM2612v1
GCF_000026145.1_ASM2614v1
GCF_000026185.1_ASM2618v1
GCF_000026205.1_ASM2620v1
GCF_000026225.1_ASM2622v1
GCF_000026405.1_ASM2640v1
GCF_000026445.2_ASM2644v2
GCF_000026685.1_ASM2668v1
GCF_000027065.2_ASM2706v1
GCF_000027085.1_ASM2708v1
GCF_000027145.1_ASM2714v1
GCF_000027165.1_ASM2716v1
GCF_000027185.1_ASM2718v1
GCF_000027205.1_ASM2720v1
GCF_000027225.1_ASM2722v1
GCF_000027265.1_ASM2726v1
GCF_000027325.1_ASM2732v1
GCF_000027345.1_ASM2734v1
GCF_000043285.1_ASM4328v1
GCF_000046685.1_ASM4668v1
GCF_000046705.1_ASM4670v1
GCF_000046845.1_ASM4684v1
GCF_000055785.1_ASM5578v1
GCF_000055945.1_ASM5594v1
GCF_000058485.1_ASM5848v1
GCF_000060285.1_ASM6028v1
GCF_000060345.1_ASM6034v1
GCF_000061505.1_ASM6150v1
GCF_000062885.1_ASM6288v1
GCF_000063485.1_ASM6348v1
GCF_000063525.1_ASM6352v1
GCF_000063605.1_ASM6360v1
GCF_000064305.2_ASM6430v2
GCF_000067165.1_ASM6716v1
GCF_000067205.1_ASM6720v1
GCF_000069185.1_ASM6918v1
GCF_000069925.1_ASM6992v1
GCF_000069945.1_ASM6994v1
GCF_000069965.1_ASM6996v1
GCF_000070465.1_ASM7046v1
GCF_000085865.1_ASM8586v1
GCF_000087965.2_ASM8796v1
GCF_000091125.1_ASM9112v1
GCF_000091305.1_ASM9130v1
GCF_000091325.1_ASM9132v1
GCF_000091465.1_ASM9146v1
GCF_000091725.1_ASM9172v1
GCF_000091785.1_ASM9178v1
GCF_000091985.1_ASM9198v1
GCF_000092025.1_ASM9202v1
GCF_000092105.1_ASM9210v1
GCF_000092125.1_ASM9212v1
GCF_000092205.1_ASM9220v1
GCF_000092225.1_ASM9222v1
GCF_000092245.1_ASM9224v1
GCF_000092265.1_ASM9226v1
GCF_000092285.1_ASM9228v1
GCF_000092365.1_ASM9236v1
GCF_000092385.1_ASM9238v1
GCF_000092405.1_ASM9240v1
GCF_000092425.1_ASM9242v1
GCF_000092445.1_ASM9244v1
GCF_000092505.1_ASM9250v1
GCF_000092525.1_ASM9252v1
GCF_000092605.1_ASM9260v1
GCF_000092645.1_ASM9264v1
GCF_000092785.1_ASM9278v1
GCF_000092825.1_ASM9282v1
GCF_000092845.1_ASM9284v1
GCF_000092865.1_ASM9286v1
GCF_000092905.1_ASM9290v1
GCF_000092925.1_ASM9292v1
GCF_000092945.1_ASM9294v1
GCF_000092965.1_ASM9296v1
GCF_000092985.1_ASM9298v1
GCF_000093025.1_ASM9302v1
GCF_000093065.1_ASM9306v1
GCF_000093085.1_ASM9308v1
GCF_000093145.3_ASM9314v2
GCF_000093165.1_ASM9316v1
GCF_000143085.1_ASM14308v1
GCF_000143145.1_ASM14314v1
GCF_000143165.1_ASM14316v1
GCF_000143225.1_ASM14322v1
GCF_000143685.1_ASM14368v1
GCF_000143705.1_ASM14370v1
GCF_000143725.1_ASM14372v1
GCF_000143845.1_ASM14384v1
GCF_000143885.2_ASM14388v2
GCF_000143965.1_ASM14396v1
GCF_000143985.1_ASM14398v1
GCF_000144405.1_ASM14440v1
GCF_000144605.1_ASM14460v1
GCF_000144625.1_ASM14462v1
GCF_000144645.1_ASM14464v1
GCF_000144695.1_ASM14469v1
GCF_000145035.1_ASM14503v1
GCF_000145215.1_ASM14521v1
GCF_000145235.1_ASM14523v1
GCF_000145255.1_ASM14525v1
GCF_000145275.1_ASM14527v1
GCF_000145615.1_ASM14561v1
GCF_000145705.1_ASM14570v1
GCF_000146025.2_ASM14602v1
GCF_000146065.2_ASM14606v1
GCF_000146165.2_ASM14616v2
GCF_000146185.1_ASM14618v1
GCF_000146875.3_ASM14687v2
GCF_000147075.1_ASM14707v1
GCF_000147335.1_ASM14733v1
GCF_000147355.1_ASM14735v1
GCF_000147695.2_ASM14769v3
GCF_000147715.2_ASM14771v3
GCF_000147815.2_ASM14781v3
GCF_000147835.2_ASM14783v3
GCF_000148425.1_ASM14842v1
GCF_000148625.1_ASM14862v1
GCF_000148645.1_ASM14864v1
GCF_000148935.1_ASM14893v1
GCF_000152245.2_ASM15224v2
GCF_000152825.2_ASM15282v2
GCF_000152925.2_ASM15292v3
GCF_000152945.2_ASM15294v2
GCF_000153165.2_ASM15316v2
GCF_000153405.2_ASM15340v2
GCF_000153485.2_ASM15348v2
GCF_000154745.2_ASM15474v2
GCF_000154765.2_ASM15476v2
GCF_000154785.2_ASM15478v2
GCF_000155675.2_ASM15567v2
GCF_000155735.2_ASM15573v2
GCF_000157355.2_ASM15735v2
GCF_000157895.3_ASM15789v2
GCF_000161795.2_ASM16179v2
GCF_000163055.2_ASM16305v2
GCF_000163615.2_ASM16361v2
GCF_000163895.2_ASM16389v2
GCF_000164675.2_ASM16467v2
GCF_000164695.2_ASM16469v2
GCF_000164865.1_ASM16486v1
GCF_000164885.1_ASM16488v1
GCF_000164965.1_ASM16496v1
GCF_000165465.1_ASM16546v1
GCF_000165485.1_ASM16548v1
GCF_000165505.1_ASM16550v1
GCF_000165715.2_ASM16571v3
GCF_000165815.1_ASM16581v1
GCF_000165835.1_ASM16583v1
GCF_000165925.1_ASM16592v1
GCF_000166055.1_ASM16605v1
GCF_000166075.1_ASM16607v1
GCF_000166275.1_ASM16627v1
GCF_000166295.1_ASM16629v1
GCF_000166335.1_ASM16633v1
GCF_000166355.1_ASM16635v1
GCF_000166395.1_ASM16639v1
GCF_000166415.1_ASM16641v1
GCF_000166695.1_ASM16669v1
GCF_000166775.1_ASM16677v1
GCF_000166935.1_ASM16693v1
GCF_000169195.2_ASM16919v2
GCF_000170955.2_ASM17095v2
GCF_000172155.1_ASM17215v1
GCF_000172635.2_ASM17263v2
GCF_000174395.2_ASM17439v2
GCF_000174795.2_ASM17479v2
GCF_000175095.2_ASM17509v2
GCF_000175115.2_ASM17511v2
GCF_000175215.2_ASM17521v2
GCF_000175295.2_ASM17529v2
GCF_000175575.2_ASM17557v2
GCF_000175935.2_ASM17593v2
GCF_000176035.2_ASM17603v2
GCF_000176115.2_ASM17611v2
GCF_000176835.2_ASM17683v2
GCF_000176855.2_ASM17685v2
GCF_000176915.2_ASM17691v2
GCF_000176935.2_ASM17693v2
GCF_000177195.2_ASM17719v2
GCF_000177235.2_ASM17723v2
GCF_000177535.2_ASM17753v2
GCF_000177615.2_ASM17761v2
GCF_000177635.2_ASM17763v2
GCF_000177655.2_ASM17765v2
GCF_000178115.2_ASM17811v2
GCF_000178395.2_ASM17839v2
GCF_000178835.2_ASM17883v2
GCF_000178955.2_ASM17895v2
GCF_000178975.2_ASM17897v2
GCF_000179015.2_ASM17901v2
GCF_000179035.2_ASM17903v2
GCF_000179395.2_ASM17939v2
GCF_000179635.2_ASM17963v2
GCF_000179915.2_ASM17991v2
GCF_000180175.2_ASM18017v2
GCF_000182745.2_ASM18274v1
GCF_000183115.1_ASM18311v1
GCF_000183135.1_ASM18313v1
GCF_000183155.1_ASM18315v1
GCF_000183365.1_ASM18336v1
GCF_000183385.1_ASM18338v1
GCF_000183405.1_ASM18340v1
GCF_000183425.1_ASM18342v1
GCF_000183665.1_ASM18366v1
GCF_000183725.1_ASM18372v1
GCF_000183745.1_ASM18374v1
GCF_000184065.1_ASM18406v1
GCF_000184325.1_ASM18432v1
GCF_000184685.1_ASM18468v1
GCF_000184705.1_ASM18470v1
GCF_000185745.1_ASM18574v1
GCF_000185805.1_ASM18580v1
GCF_000185885.1_ASM18588v1
GCF_000185905.1_ASM18590v1
GCF_000185965.1_ASM18596v1
GCF_000185985.2_ASM18598v2
GCF_000186225.1_ASM18622v1
GCF_000186245.1_ASM18624v1
GCF_000186265.1_ASM18626v1
GCF_000186345.1_ASM18634v1
GCF_000186385.1_ASM18638v1
GCF_000186885.1_ASM18688v1
GCF_000186985.1_ASM18698v3
GCF_000187005.1_ASM18700v1
GCF_000187705.1_ASM18770v1
GCF_000187935.1_ASM18793v2
GCF_000189415.1_ASM18941v1
GCF_000189535.1_ASM18953v1
GCF_000189775.2_ASM18977v3
GCF_000190435.1_ASM19043v1
GCF_000190535.1_ASM19053v1
GCF_000190555.1_ASM19055v1
GCF_000190575.1_ASM19057v1
GCF_000190595.1_ASM19059v1
GCF_000190635.1_ASM19063v1
GCF_000190735.1_ASM19073v2
GCF_000191045.1_ASM19104v1
GCF_000191145.1_ASM19114v1
GCF_000191925.1_ASM19192v1
GCF_000192635.1_ASM19263v1
GCF_000192745.1_ASM19274v1
GCF_000192845.1_ASM19284v1
GCF_000192865.1_ASM19286v1
GCF_000193205.1_ASM19320v1
GCF_000193395.1_ASM19339v1
GCF_000193435.2_ASM19343v3
GCF_000193595.2_ASM19359v3
GCF_000194115.1_ASM19411v1
GCF_000194135.1_ASM19413v1
GCF_000194605.1_ASM19460v1
GCF_000194745.1_ASM19474v1
GCF_000194805.1_ASM19480v1
GCF_000195085.1_ASM19508v1
GCF_000195275.1_ASM19527v1
GCF_000195295.1_ASM19529v1
GCF_000195315.1_ASM19531v1
GCF_000195335.1_ASM19533v1
GCF_000195515.1_ASM19551v1
GCF_000195535.1_ASM19553v1
GCF_000195575.1_ASM19557v1
GCF_000196015.1_ASM19601v1
GCF_000196095.1_ASM19609v1
GCF_000196215.1_ASM19621v1
GCF_000196235.1_ASM19623v1
GCF_000196275.1_ASM19627v1
GCF_000196295.1_ASM19629v1
GCF_000196315.1_ASM19631v1
GCF_000196355.1_ASM19635v1
GCF_000196395.1_ASM19639v1
GCF_000196435.1_ASM19643v1
GCF_000196455.1_ASM19645v1
GCF_000196475.1_ASM19647v1
GCF_000196495.1_ASM19649v1
GCF_000196515.1_ASM19651v1
GCF_000196535.1_ASM19653v1
GCF_000196615.1_ASM19661v1
GCF_000196675.1_ASM19667v1
GCF_000196695.1_ASM19669v1
GCF_000196795.1_ASM19679v1
GCF_000196815.1_ASM19681v1
GCF_000196835.1_ASM19683v1
GCF_000196855.1_ASM19685v1
GCF_000196875.1_ASM19687v1
GCF_000197735.1_ASM19773v1
GCF_000198515.1_ASM19851v1
GCF_000198775.1_ASM19877v1
GCF_000199675.1_ASM19967v1
GCF_000200595.1_ASM20059v1
GCF_000202635.1_ASM20263v1
GCF_000202835.1_ASM20283v1
GCF_000203875.1_ASM20387v1
GCF_000203895.1_ASM20389v1
GCF_000203935.1_ASM20393v1
GCF_000204115.1_ASM20411v1
GCF_000204135.1_ASM20413v1
GCF_000204155.1_ASM20415v1
GCF_000208385.1_ASM20838v1
GCF_000208405.1_ASM20840v1
GCF_000209655.1_ASM20965v1
GCF_000209675.1_ASM20967v1
GCF_000210895.1_ASM21089v1
GCF_000210915.2_ASM21091v2
GCF_000211375.1_ASM21137v1
GCF_000211855.2_ASM21185v3
GCF_000212335.1_ASM21233v1
GCF_000212355.1_ASM21235v1
GCF_000212375.1_ASM21237v1
GCF_000212395.1_ASM21239v1
GCF_000212415.1_ASM21241v1
GCF_000212675.2_ASM21267v2
GCF_000212695.1_ASM21269v1
GCF_000212735.1_ASM21273v1
GCF_000213235.1_ASM21323v1
GCF_000213255.1_ASM21325v1
GCF_000213655.1_ASM21365v1
GCF_000213785.1_ASM21378v1
GCF_000213805.1_ASM21380v1
GCF_000213865.1_ASM21386v1
GCF_000214095.2_ASM21409v3
GCF_000214155.1_ASM21415v1
GCF_000214175.1_ASM21417v1
GCF_000214195.1_ASM21419v1
GCF_000214215.1_ASM21421v1
GCF_000214355.1_ASM21435v1
GCF_000214375.1_ASM21437v1
GCF_000214395.1_ASM21439v1
GCF_000214435.1_ASM21443v1
GCF_000214665.1_ASM21466v1
GCF_000214785.1_ASM21478v1
GCF_000214825.1_ASM21482v1
GCF_000215085.1_ASM21508v1
GCF_000215105.1_ASM21510v1
GCF_000215645.1_ASM21564v1
GCF_000215705.1_ASM21570v1
GCF_000215745.1_ASM21574v1
GCF_000215975.1_ASM21597v1
GCF_000217655.1_ASM21765v1
GCF_000217675.1_ASM21767v1
GCF_000217795.1_ASM21779v1
GCF_000217815.1_ASM21781v1
GCF_000218545.1_ASM21854v1
GCF_000218625.1_ASM21862v1
GCF_000218895.1_ASM21889v1
GCF_000218915.1_ASM21891v1
GCF_000219045.1_ASM21904v1
GCF_000219105.1_ASM21910v1
GCF_000219175.1_ASM21917v1
GCF_000219215.1_ASM21921v1
GCF_000219355.1_ASM21935v1
GCF_000219535.2_ASM21953v3
GCF_000219585.1_ASM21958v1
GCF_000219725.1_ASM21972v1
GCF_000219785.1_ASM21978v1
GCF_000219805.1_ASM21980v1
GCF_000219915.2_ASM21991v3
GCF_000220625.1_ASM22062v1
GCF_000221005.1_ASM22100v1
GCF_000221045.1_ASM22104v1
GCF_000221205.1_ASM22120v1
GCF_000221985.1_ASM22198v1
GCF_000222305.1_ASM22230v1
GCF_000222485.1_ASM22248v1
GCF_000222835.1_ASM22283v1
GCF_000223215.1_ASM22321v1
GCF_000224005.2_ASM22400v3
GCF_000224085.1_ASM22408v1
GCF_000224105.1_ASM22410v1
GCF_000224675.1_ASM22467v1
GCF_000224985.1_ASM22498v1
GCF_000225325.1_ASM22532v1
GCF_000225345.1_ASM22534v1
GCF_000225915.1_ASM22591v1
GCF_000226295.1_ASM22629v1
GCF_000226315.1_ASM22631v1
GCF_000226565.1_ASM22656v1
GCF_000226625.1_ASM22662v1
GCF_000227665.2_ASM22766v3
GCF_000227685.2_ASM22768v3
GCF_000227705.2_ASM22770v3
GCF_000227745.2_ASM22774v3
GCF_000230275.1_ASM23027v1
GCF_000230555.1_ASM23055v1
GCF_000230695.2_ASM23069v3
GCF_000230895.2_ASM23089v3
GCF_000230995.2_ASM23099v3
GCF_000231385.2_ASM23138v3
GCF_000231405.2_ASM23140v3
GCF_000233435.1_ASM23343v1
GCF_000233715.2_ASM23371v3
GCF_000233775.1_ASM23377v1
GCF_000233915.3_ASM23391v4
GCF_000235405.2_ASM23540v3
GCF_000235585.1_ASM23558v1
GCF_000235605.1_ASM23560v1
GCF_000236065.1_ASM23606v1
GCF_000236405.1_ASM23640v1
GCF_000236585.1_ASM23658v1
GCF_000236605.1_ASM23660v1
GCF_000236665.1_ASM23666v1
GCF_000236685.1_ASM23668v1
GCF_000236705.1_ASM23670v1
GCF_000236925.1_ASM23692v1
GCF_000237085.1_ASM23708v1
GCF_000237145.1_ASM23714v1
GCF_000237205.1_ASM23720v1
GCF_000237305.1_ASM23730v1
GCF_000237845.1_ASM23784v1
GCF_000237995.1_ASM23799v2
GCF_000238215.1_ASM23821v1
GCF_000238995.1_ASM23899v1
GCF_000239475.1_ASM23947v1
GCF_000240075.2_ASM24007v2
GCF_000240325.1_ASM24032v1
GCF_000241055.1_ASM24105v1
GCF_000241385.1_ASM24138v1
GCF_000241875.1_ASM24187v1
GCF_000242255.2_ASM24225v3
GCF_000242335.1_ASM24233v3
GCF_000242455.2_ASM24245v3
GCF_000242595.2_ASM24259v3
GCF_000242635.2_ASM24263v3
GCF_000242895.2_ASM24289v3
GCF_000242915.1_ASM24291v2
GCF_000242935.2_ASM24293v3
GCF_000243075.1_ASM24307v1
GCF_000243115.2_ASM24311v3
GCF_000243135.2_ASM24313v3
GCF_000243155.2_ASM24315v3
GCF_000244875.1_ASM24487v1
GCF_000245355.1_ASM24535v1
GCF_000246835.1_ASM24683v1
GCF_000246855.1_ASM24685v1
GCF_000247605.1_ASM24760v1
GCF_000247715.1_ASM24771v1
GCF_000248095.2_ASM24809v3
GCF_000248415.1_ASM24841v1
GCF_000250635.1_ASM25063v1
GCF_000250675.2_ASM25067v3
GCF_000252445.1_ASM25244v1
GCF_000252975.1_ASM25297v1
GCF_000252995.1_ASM25299v1
GCF_000253015.1_ASM25301v1
GCF_000253035.1_ASM25303v1
GCF_000253155.1_ASM25315v1
GCF_000253255.1_ASM25325v1
GCF_000253275.1_ASM25327v1
GCF_000253295.1_ASM25329v1
GCF_000253315.1_ASM25331v1
GCF_000253355.1_ASM25335v1
GCF_000253375.1_ASM25337v1
GCF_000255115.2_ASM25511v3
GCF_000255135.1_ASM25513v1
GCF_000255295.1_ASM25529v1
GCF_000255355.1_ASM25535v1
GCF_000255535.1_ASM25553v1
GCF_000257545.3_ASM25754v3
GCF_000258405.1_ASM25840v1
GCF_000259175.1_ASM25917v1
GCF_000259255.1_ASM25925v1
GCF_000259365.1_ASM25936v1
GCF_000260925.1_ASM26092v1
GCF_000260965.1_ASM26096v1
GCF_000260985.3_ASM26098v2
GCF_000261025.1_ASM26102v1
GCF_000261345.2_ASM26134v2
GCF_000262165.1_ASM26216v1
GCF_000262205.1_ASM26220v1
GCF_000262305.1_ASM26230v1
GCF_000262695.1_ASM26269v1
GCF_000262715.1_ASM26271v1
GCF_000263195.1_ASM26319v1
GCF_000264455.2_ASM26445v2
GCF_000265295.1_ASM26529v1
GCF_000265365.1_ASM26536v1
GCF_000265385.1_ASM26538v1
GCF_000265405.1_ASM26540v1
GCF_000265425.1_ASM26542v1
GCF_000265465.1_ASM26546v1
GCF_000265505.1_ASM26550v1
GCF_000266885.1_ASM26688v1
GCF_000266905.1_ASM26690v1
GCF_000266925.1_ASM26692v1
GCF_000266945.1_ASM26694v1
GCF_000269925.1_ASM26992v1
GCF_000269985.1_ASM26998v1
GCF_000270085.1_ASM27008v1
GCF_000270165.1_ASM27016v1
GCF_000270205.1_ASM27020v1
GCF_000270245.1_ASM27024v1
GCF_000270285.1_ASM27028v1
GCF_000270305.1_ASM27030v1
GCF_000271325.1_ASM27132v1
GCF_000271405.2_ASM27140v2
GCF_000271665.2_ASM27166v2
GCF_000276825.1_ASM27682v1
GCF_000277715.1_ASM27771v1
GCF_000277795.1_ASM27779v1
GCF_000279145.1_ASM27914v1
GCF_000280925.3_ASM28092v3
GCF_000281175.1_ASM28117v1
GCF_000283275.1_ASM28327v1
GCF_000283515.1_ASM28351v1
GCF_000283535.1_ASM28353v1
GCF_000283555.1_ASM28355v1
GCF_000283575.1_ASM28357v1
GCF_000283595.1_ASM28359v1
GCF_000283615.1_ASM28361v1
GCF_000283635.1_ASM28363v1
GCF_000283655.1_ASM28365v1
GCF_000283975.1_ASM28397v1
GCF_000283995.1_ASM28399v1
GCF_000284015.1_ASM28401v1
GCF_000284035.1_ASM28403v1
GCF_000284055.1_ASM28405v1
GCF_000284075.1_ASM28407v1
GCF_000284095.1_ASM28409v1
GCF_000284115.1_ASM28411v1
GCF_000284155.1_ASM28415v1
GCF_000284175.1_ASM28417v1
GCF_000284195.1_ASM28419v1
GCF_000284235.1_ASM28423v1
GCF_000284255.1_ASM28425v1
GCF_000284275.1_ASM28427v1
GCF_000284295.1_ASM28429v1
GCF_000284315.1_ASM28431v1
GCF_000284335.1_ASM28433v1
GCF_000284375.1_ASM28437v1
GCF_000284415.1_ASM28441v2
GCF_000284515.1_ASM28451v1
GCF_000284635.1_ASM28463v1
GCF_000286435.2_ASM28643v2
GCF_000287215.2_ASM28721v3
GCF_000287295.1_ASM28729v1
GCF_000287335.1_ASM28733v1
GCF_000287355.1_ASM28735v1
GCF_000292685.1_ASM29268v1
GCF_000292915.1_ASM29291v1
GCF_000294515.1_ASM29451v1
GCF_000294695.2_ASM29469v2
GCF_000297055.2_ASM29705v2
GCF_000297075.2_Ppseudo_final
GCF_000298095.1_ASM29809v1
GCF_000299095.1_ASM29909v1
GCF_000299115.1_ASM29911v1
GCF_000299235.1_ASM29923v1
GCF_000299335.2_ASM29933v2
GCF_000299355.1_ASM29935v1
GCF_000299435.1_ASM29943v1
GCF_000299965.1_ASM29996v1
GCF_000300005.1_ASM30000v1
GCF_000300095.1_ASM30009v1
GCF_000300135.1_ASM30013v1
GCF_000300235.2_ASM30023v2
GCF_000300295.3_ASM30029v3
GCF_000300455.2_ASM30045v3
GCF_000302535.1_ASM30253v1
GCF_000304215.1_ASM30421v1
GCF_000304315.1_Msp_SC2
GCF_000304455.1_CCh_cEper1
GCF_000305775.1_ASM30577v1
GCF_000305785.2_ASM30578v2
GCF_000305815.1_ASM30581v1
GCF_000305935.1_ASM30593v1
GCF_000306785.1_ASM30678v1
GCF_000306805.1_ASM30680v1
GCF_000306885.1_ASM30688v1
GCF_000307105.1_ASM30710v1
GCF_000307165.1_ASM30716v1
GCF_000309885.1_ASM30988v1
GCF_000310065.1_ASM31006v1
GCF_000310105.2_ASM31010v2
GCF_000312705.1_ASM31270v1
GCF_000313175.2_ASM31317v2
GCF_000316175.1_ASM31617v1
GCF_000316515.1_ASM31651v1
GCF_000316575.1_ASM31657v1
GCF_000316605.1_ASM31660v1
GCF_000316625.1_ASM31662v1
GCF_000316645.1_ASM31664v1
GCF_000316665.1_ASM31666v1
GCF_000316685.1_ASM31668v1
GCF_000317025.1_ASM31702v1
GCF_000317045.1_ASM31704v1
GCF_000317065.1_ASM31706v1
GCF_000317085.1_ASM31708v1
GCF_000317105.1_ASM31710v1
GCF_000317125.1_ASM31712v1
GCF_000317305.3_ASM31730v3
GCF_000317435.1_ASM31743v1
GCF_000317475.1_ASM31747v1
GCF_000317495.1_ASM31749v1
GCF_000317515.1_ASM31751v1
GCF_000317555.1_ASM31755v1
GCF_000317575.1_ASM31757v1
GCF_000317615.1_ASM31761v1
GCF_000317635.1_ASM31763v1
GCF_000317675.1_ASM31767v1
GCF_000317695.1_ASM31769v1
GCF_000317835.1_ASM31783v1
GCF_000317895.1_ASM31789v1
GCF_000317935.1_ASM31793v1
GCF_000317955.1_ASM31795v1
GCF_000317975.2_ASM31797v2
GCF_000319225.1_ASM31922v1
GCF_000319245.1_ASM31924v1
GCF_000319385.1_ASM31938v1
GCF_000319575.2_ASM31957v2
GCF_000321415.2_ASM32141v2
GCF_000325705.1_ASM32570v1
GCF_000325745.1_ASM32574v1
GCF_000327045.1_ASM32704v1
GCF_000328625.1_ASM32862v1
GCF_000328705.1_ASM32870v1
GCF_000328725.1_ASM32872v1
GCF_000330845.1_ASM33084v1
GCF_000330865.1_ASM33086v1
GCF_000330885.1_ASM33088v1
GCF_000331735.1_ASM33173v1
GCF_000331995.1_ASM33199v1
GCF_000332115.1_ASM33211v1
GCF_000332735.1_ASM33273v1
GCF_000336445.1_ASM33644v1
GCF_000336465.1_ASM33646v1
GCF_000340435.2_ASM34043v3
GCF_000340795.1_ASM34079v1
GCF_000340885.1_ASM34088v1
GCF_000341345.1_ASM34134v1
GCF_000341355.1_ASM34135v1
GCF_000341385.1_ASM34138v1
GCF_000341395.1_ASM34139v1
GCF_000342265.1_ASM34226v1
GCF_000344785.1_ASM34478v1
GCF_000344805.1_ASM34480v1
GCF_000347595.1_ASM34759v1
GCF_000347635.1_ASM34763v1
GCF_000347675.2_ASM34767v2
GCF_000347695.1_ASM34769v1
GCF_000348565.1_ASM34856v1
GCF_000348585.1_ASM34858v1
GCF_000348725.1_ASM34872v1
GCF_000348785.1_ASM34878v1
GCF_000348805.1_ASM34880v1
GCF_000349225.1_ASM34922v1
GCF_000349765.1_ASM34976v1
GCF_000349845.1_ASM34984v1
GCF_000349945.1_ASM34994v1
GCF_000354175.2_ASM35417v2
GCF_000355675.1_ASM35567v1
GCF_000359525.1_ASM35952v1
GCF_000364805.1_ASM36480v1
GCF_000367205.1_ASM36720v1
GCF_000367425.1_ASM36742v1
GCF_000376585.1_ASM37658v1
GCF_000385925.1_ASM38592v1
GCF_000385945.1_ASM38594v1
GCF_000389635.1_ASM38963v1
GCF_000389965.1_ASM38996v1
GCF_000397185.1_ASM39718v1
GCF_000400635.2_ASM40063v2
GCF_000400935.1_ASM40093v1
GCF_000400955.1_ASM40095v1
GCF_000402035.1_ASM40203v1
GCF_000408885.1_ASM40888v1
GCF_000410515.1_ASM41051v1
GCF_000412265.2_ASM41226v2
GCF_000412695.1_ASM41269v1
GCF_000416365.2_ASM41636v2
GCF_000418305.1_ASM41830v1
GCF_000418365.1_ASM41836v1
GCF_000418535.1_ASM41853v2
GCF_000422085.1_ASM42208v1
GCF_000439435.1_ASM43943v1
GCF_000439455.1_ASM43945v1
GCF_000441535.1_ASM44153v1
GCF_000441555.1_ASM44155v1
GCF_000442595.1_ASM44259v1
GCF_000442645.1_ASM44264v1
GCF_000444875.1_ASM44487v1
GCF_000444995.1_ASM44499v1
GCF_000445425.4_ASM44542v4
GCF_000445995.2_ASM44599v2
GCF_000447675.1_ASM44767v1
GCF_000455605.1_GPTSA100-9
GCF_000462975.1_ASM46297v1
GCF_000463395.1_ASM46339v1
GCF_000463465.1_ASM46346v1
GCF_000465235.1_ASM46523v1
GCF_000468615.2_ASM46861v2
GCF_000470765.1_ASM47076v1
GCF_000471965.1_ASM47196v1
GCF_000473245.1_ASM47324v1
GCF_000473305.1_ASM47330v1
GCF_000473995.1_ASM47399v1
GCF_000477415.1_ASM47741v1
GCF_000477435.1_ASM47743v1
GCF_000478825.2_ASM47882v2
GCF_000478885.1_ASM47888v1
GCF_000478905.1_ASM47890v1
GCF_000479335.1_ASM47933v1
GCF_000484505.1_ASM48450v1
GCF_000484535.1_ASM48453v1
GCF_000485905.1_ASM48590v1
GCF_000493735.1_ASM49373v1
GCF_000494755.1_ASM49475v1
GCF_000494875.1_ASM49487v1
GCF_000494915.1_ASM49491v1
GCF_000495935.2_ASM49593v2
GCF_000496285.1_ASM49628v1
GCF_000496595.1_ASM49659v1
GCF_000496635.1_ASM49663v1
GCF_000498975.2_ASM49897v2
GCF_000499645.1_IRBG74
GCF_000499665.2_RMONA_1
GCF_000500935.1_ASM50093v1
GCF_000503875.1_ASM50387v1
GCF_000503895.1_ASM50389v1
GCF_000503915.1_ASM50391v1
GCF_000504085.1_ASM50408v1
GCF_000504105.1_ASM50410v1
GCF_000504125.1_ASM50412v1
GCF_000507245.1_ASM50724v1
GCF_000508205.1_ASM50820v1
GCF_000508225.1_ASM50822v1
GCF_000508245.1_ASM50824v1
GCF_000510285.1_ASM51028v1
GCF_000511305.1_ASM51130v1
GCF_000511325.1_ASM51132v1
GCF_000511355.1_ASM51135v1
GCF_000511405.1_ASM51140v1
GCF_000512125.1_ASM51212v1
GCF_000512145.1_ASM51214v2
GCF_000512205.2_ASM51220v2
GCF_000512355.1_ASM51235v1
GCF_000512735.1_ASM51273v1
GCF_000512895.1_ASM51289v1
GCF_000512915.1_ASM51291v1
GCF_000513295.1_MGMSRv2
GCF_000513475.1_Bbla
GCF_000517305.1_ASM51730v1
GCF_000517365.1_ASM51736v1
GCF_000517405.1_ASM51740v1
GCF_000517425.1_ASM51742v1
GCF_000517565.1_ASM51756v1
GCF_000520015.2_ASM52001v2
GCF_000521505.1_ASM52150v1
GCF_000521605.1_ASM52160v1
GCF_000522545.2_ASM52254v2
GCF_000523235.1_ASM52323v1
GCF_000524555.1_ASM52455v1
GCF_000525635.1_ASM52563v1
GCF_000525655.1_ASM52565v1
GCF_000550765.1_ASM55076v1
GCF_000550785.1_ASM55078v1
GCF_000550805.1_ASM55080v1
GCF_000565175.1_ASM56517v1
GCF_000565215.1_ASM56521v1
GCF_000568815.1_ASM56881v1
GCF_000576555.1_ASM57655v1
GCF_000577275.1_LPU83
GCF_000577895.1_M2_40
GCF_000582515.1_ASM58251v1
GCF_000583875.1_ASM58387v1
GCF_000590495.2_ASM59049v2
GCF_000590555.1_ASM59055v1
GCF_000590795.1_ASM59079v1
GCF_000590925.1_ASM59092v1
GCF_000597785.2_ASM59778v2
GCF_000597865.1_ASM59786v1
GCF_000599985.1_ASM59998v1
GCF_000600005.1_ASM60000v1
GCF_000600105.1_ASM60010v1
GCF_000612055.1_ASM61205v1
GCF_000612485.1_ASM61248v1
GCF_000612505.1_ASM61250v1
GCF_000612685.1_scf7180000000004
GCF_000619905.2_ASM61990v2
GCF_000626635.1_ASM62663v1
GCF_000626675.1_ASM62667v1
GCF_000632475.1_ASM63247v2
GCF_000632805.1_ASM63280v1
GCF_000632845.1_ASM63284v1
GCF_000632985.1_ASM63298v1
GCF_000648515.1_ASM64851v1
GCF_000661895.1_ASM66189v1
GCF_000688775.1_ASM68877v1
GCF_000689415.1_PKB13
GCF_000695235.1_ASM69523v1
GCF_000695835.1_ASM69583v1
GCF_000695995.1_ASM69599v1
GCF_000696485.1_ASM69648v1
GCF_000698865.1_ASM69886v1
GCF_000699505.1_ASM69950v1
GCF_000706685.1_ASM70668v1
GCF_000706725.1_ASM70672v1
GCF_000706765.1_ASM70676v1
GCF_000709435.1_ASM70943v1
GCF_000709555.1_ASM70955v1
GCF_000723165.1_JAG1
GCF_000723465.1_Rb803
GCF_000723505.1_Mucivorans_M3_Nelson-Bomar-Fixed
GCF_000724485.1_ASM72448v1
GCF_000724605.1_ASM72460v1
GCF_000724625.1_ASM72462v1
GCF_000724775.3_ASM72477v3
GCF_000725285.1_ASM72528v1
GCF_000725345.1_ASM72534v1
GCF_000725365.1_ASM72536v1
GCF_000725385.1_ASM72538v1
GCF_000725405.1_ASM72540v1
GCF_000730245.1_ASM73024v1
GCF_000730385.1_ASM73038v1
GCF_000731295.1_RG1141_Ch_pA_pB
GCF_000732905.1_ASM73290v1
GCF_000732925.1_ASM73292v1
GCF_000732945.1_ASM73294v1
GCF_000734015.1_ASM73401v1
GCF_000734895.2_ASM73489v2
GCF_000734975.2_ASM73497v2
GCF_000736415.1_ASM73641v1
GCF_000737325.1_ASM73732v2
GCF_000737515.1_ASM73751v1
GCF_000737535.1_ASM73753v1
GCF_000737575.1_ASM73757v1
GCF_000737865.1_ASM73786v1
GCF_000738435.1_ASM73843v1
GCF_000739085.1_ASM73908v1
GCF_000739105.1_ASM73910v1
GCF_000739435.1_ASM73943v1
GCF_000739455.1_ASM73945v1
GCF_000740985.1_ASM74098v1
GCF_000742835.1_ASM74283v1
GCF_000742855.1_ASM74285v1
GCF_000743945.1_ASM74394v1
GCF_000746525.1_ASM74652v1
GCF_000746585.1_ASM74658v2
GCF_000747315.1_ASM74731v1
GCF_000747345.1_ASM74734v1
GCF_000747525.1_ASM74752v1
GCF_000747565.1_ASM74756v1
GCF_000754265.1_ASM75426v1
GCF_000755145.1_ASM75514v1
GCF_000755185.1_ASM75518v1
GCF_000755585.2_ASM75558v2
GCF_000755705.1_ASM75570v1
GCF_000755985.1_ASM75598v1
GCF_000756615.1_ASM75661v1
GCF_000756715.1_PRJEB5505_assembly_1
GCF_000756775.1_PRJEB6478_assembly_1
GCF_000757785.1_ASM75778v1
GCF_000757795.1_ASM75779v1
GCF_000757825.1_ASM75782v1
GCF_000757845.1_ASM75784v1
GCF_000758565.1_ASM75856v1
GCF_000758665.1_ASM75866v1
GCF_000758685.1_ASM75868v1
GCF_000758705.1_ASM75870v1
GCF_000758725.1_ASM75872v1
GCF_000759475.1_ASM75947v1
GCF_000759535.1_ASM75953v1
GCF_000761135.1_ASM76113v1
GCF_000761155.1_ASM76115v1
GCF_000761215.1_ASM76121v1
GCF_000763535.1_ASM76353v2
GCF_000763575.1_ASM76357v1
GCF_000764535.1_ASM76453v1
GCF_000764555.1_ASM76455v1
GCF_000767055.1_ASM76705v1
GCF_000767465.1_ASM76746v1
GCF_000770565.1_ASM77056v1
GCF_000772105.1_ASM77210v1
GCF_000775995.1_ASM77599v1
GCF_000784965.1_ASM78496v1
GCF_000785495.1_ASM78549v1
GCF_000785535.1_ASM78553v1
GCF_000785555.1_ASM78555v1
GCF_000786425.1_Vibrio_anguillarum_NB10_serovar_O1
GCF_000786695.1_ASM78669v1
GCF_000788395.1_ASM78839v1
GCF_000789375.1_ASM78937v1
GCF_000789395.1_ASM78939v1
GCF_000800255.1_ASM80025v1
GCF_000800295.1_ASM80029v1
GCF_000800395.1_ASM80039v1
GCF_000800455.1_ASM80045v1
GCF_000800475.1_ASM80047v1
GCF_000800725.1_ASM80072v2
GCF_000800825.1_ASM80082v1
GCF_000801145.1_ASM80114v1
GCF_000801275.2_ASM80127v1
GCF_000801295.1_ASM80129v1
GCF_000801755.2_ASM80175v2
GCF_000803625.1_ASM80362v1
GCF_000803645.1_ASM80364v1
GCF_000807225.1_ASM80722v1
GCF_000807275.1_ASM80727v1
GCF_000814165.3_ASM81416v3
GCF_000814825.1_ASM81482v1
GCF_000814845.1_ASM81484v1
GCF_000815025.1_ASM81502v1
GCF_000815065.1_ASM81506v1
GCF_000815105.1_ASM81510v1
GCF_000815145.1_ASM81514v1
GCF_000815185.1_ASM81518v1
GCF_000815225.1_ASM81522v1
GCF_000816025.1_ASM81602v1
GCF_000816045.1_ASM81604v1
GCF_000816085.1_ASM81608v1
GCF_000816185.1_ASM81618v1
GCF_000816245.1_ASM81624v1
GCF_000816265.1_ASM81626v1
GCF_000816345.1_ASM81634v1
GCF_000816785.1_ASM81678v1
GCF_000816845.1_ASM81684v1
GCF_000817325.1_ASM81732v1
GCF_000817955.1_ASM81795v1
GCF_000817975.1_ASM81797v1
GCF_000818015.1_ASM81801v1
GCF_000818035.1_ASM81803v1
GCF_000818095.1_ASM81809v1
GCF_000819445.1_ASM81944v1
GCF_000819565.1_ASM81956v1
GCF_000827045.1_ASM82704v1
GCF_000827125.1_ASM82712v1
GCF_000828475.1_ASM82847v1
GCF_000828515.1_ASM82851v1
GCF_000828615.1_ASM82861v1
GCF_000828635.1_ASM82863v1
GCF_000828655.1_ASM82865v1
GCF_000828675.1_ASM82867v1
GCF_000828715.1_ASM82871v1
GCF_000828815.1_ASM82881v1
GCF_000828835.1_ASM82883v1
GCF_000828855.1_ASM82885v1
GCF_000828895.1_ASM82889v1
GCF_000828975.1_ASM82897v1
GCF_000829195.1_ASM82919v1
GCF_000829235.1_ASM82923v1
GCF_000829315.1_ASM82931v1
GCF_000829375.1_ASM82937v1
GCF_000829395.1_ASM82939v1
GCF_000829415.1_ASM82941v1
GCF_000830005.1_ASM83000v1
GCF_000830985.1_ASM83098v1
GCF_000831005.1_ASM83100v1
GCF_000831065.1_ASM83106v1
GCF_000831485.1_ASM83148v1
GCF_000831585.1_ASM83158v1
GCF_000831645.3_ASM83164v3
GCF_000832145.1_ASM83214v1
GCF_000832305.1_ASM83230v1
GCF_000833025.1_ASM83302v1
GCF_000833575.1_ASM83357v1
GCF_000834215.1_ASM83421v1
GCF_000834255.1_ASM83425v1
GCF_000834395.1_ASM83439v1
GCF_000834455.1_ASM83445v1
GCF_000834515.1_ASM83451v1
GCF_000834865.1_ASM83486v1
GCF_000835165.1_ASM83516v1
GCF_000875675.1_ASM87567v1
GCF_000875755.1_ASM87575v1
GCF_000931445.1_ASM93144v1
GCF_000931465.1_ASM93146v1
GCF_000934605.1_ASM93460v1
GCF_000935025.1_ASM93502v1
GCF_000940805.1_ASM94080v1
GCF_000940995.1_ASM94099v1
GCF_000941055.1_ASM94105v1
GCF_000941075.1_ASM94107v1
GCF_000943805.1_ASM94380v1
GCF_000949425.1_ASM94942v1
GCF_000950575.1_ASM95057v1
GCF_000952035.1_ASM95203v1
GCF_000952895.1_BS34ACh
GCF_000952975.1_D1G
GCF_000953135.1_LFA
GCF_000953195.1_Acholeplasma_oculi_strain_19L
GCF_000953215.1_DG5
GCF_000953355.1_XNC2
GCF_000953435.1_CEM1.1
GCF_000953475.1_MfumSolVChr1
GCF_000953535.1_E5B
GCF_000953635.1_LMI
GCF_000953655.1_LHA
GCF_000953695.1_AWOD1
GCF_000953735.1_MVIS1
GCF_000954115.1_ASM95411v1
GCF_000954135.1_ASM95413v2
GCF_000955665.1_ASM95566v1
GCF_000956315.1_ASM95631v1
GCF_000959245.1_ASM95924v1
GCF_000959325.1_ASM95932v1
GCF_000959505.1_ASM95950v1
GCF_000960975.1_ASM96097v1
GCF_000961095.1_ASM96109v1
GCF_000961515.1_ASM96151v1
GCF_000963575.1_ASM96357v1
GCF_000963865.1_ASM96386v1
GCF_000967305.2_ASM96730v2
GCF_000967425.1_ASM96742v1
GCF_000967895.1_ASM96789v1
GCF_000967915.1_ASM96791v1
GCF_000968055.1_ASM96805v1
GCF_000968135.1_ASM96813v1
GCF_000968175.1_ASM96817v1
GCF_000968195.1_ASM96819v1
GCF_000968375.1_ASM96837v1
GCF_000968535.2_ASM96853v1
GCF_000969685.2_ASM96968v1
GCF_000971565.1_ASM97156v1
GCF_000972245.2_ASM97224v2
GCF_000972765.1_ASM97276v1
GCF_000972785.2_ASM97278v2
GCF_000973085.1_ASM97308v1
GCF_000973105.1_ASM97310v1
GCF_000973505.1_ASM97350v1
GCF_000973705.1_ASM97370v1
GCF_000973725.1_ASM97372v1
GCF_000974425.1_ASM97442v1
GCF_000978495.1_ASM97849v1
GCF_000980815.1_ASM98081v1
GCF_000980835.1_ASM98083v1
GCF_000981505.1_Candidatus_Methylopumilus_planktonicus_MMS-2-53
GCF_000981525.1_L_piscium
GCF_000981545.1_Y1
GCF_000981585.1_SBR5_T_
GCF_000981765.1_ASM98176v1
GCF_000981805.1_ASM98180v1
GCF_000982715.1_ASM98271v1
GCF_000987835.1_ASM98783v1
GCF_000987865.1_ASM98786v1
GCF_000988065.1_ASM98806v1
GCF_000993785.2_ASM99378v2
GCF_001005265.1_ASM100526v1
GCF_001005905.1_ASM100590v1
GCF_001006005.1_ASM100600v1
GCF_001007005.1_Pseudomonas_sp._strain_CCOS_191
GCF_001007025.1_Wien1
GCF_001007875.1_ASM100787v1
GCF_001007935.1_ASM100793v1
GCF_001007995.1_ASM100799v1
GCF_001008165.2_ASM100816v2
GCF_001010285.1_ASM101028v1
GCF_001010485.1_ASM101048v1
GCF_001010505.1_ASM101050v1
GCF_001010785.1_ASM101078v1
GCF_001010805.1_ASM101080v1
GCF_001011035.1_ASM101103v1
GCF_001011155.1_ASM101115v1
GCF_001011675.1_ASM101167v1
GCF_001013905.1_sleC34
GCF_001017435.1_ASM101743v1
GCF_001017655.1_ASM101765v1
GCF_001020955.1_ASM102095v1
GCF_001020985.1_ASM102098v1
GCF_001021045.1_ASM102104v1
GCF_001021065.1_ASM102106v1
GCF_001021085.1_ASM102108v1
GCF_001021385.1_ASM102138v1
GCF_001021935.1_ASM102193v1
GCF_001021975.1_ASM102197v1
GCF_001022135.1_ASM102213v1
GCF_001023575.1_ASM102357v1
GCF_001025155.1_ASM102515v1
GCF_001025195.1_ASM102519v1
GCF_001025215.1_ASM102521v1
GCF_001026985.1_ASM102698v1
GCF_001027025.1_ASM102702v1
GCF_001027285.1_ASM102728v1
GCF_001027545.1_ASM102754v1
GCF_001028085.1_ASM102808v1
GCF_001028625.1_ASM102862v1
GCF_001028645.1_ASM102864v1
GCF_001028665.1_ASM102866v1
GCF_001028705.1_ASM102870v1
GCF_001029105.1_ASM102910v1
GCF_001029145.1_ASM102914v1
GCF_001029245.1_ASM102924v1
GCF_001029265.1_ASM102926v1
GCF_001038625.1_ASM103862v1
GCF_001042635.1_ASM104263v1
GCF_001042675.1_ASM104267v1
GCF_001042695.1_ASM104269v1
GCF_001042715.1_ASM104271v1
GCF_001043175.1_ASM104317v1
GCF_001046955.1_ASM104695v1
GCF_001047675.1_ASM104767v1
GCF_001050115.1_ASM105011v1
GCF_001050135.1_ASM105013v1
GCF_001050435.1_ASM105043v1
GCF_001050475.1_ASM105047v1
GCF_001077715.1_ASM107771v1
GCF_001077815.1_ASM107781v1
GCF_001078055.1_ASM107805v1
GCF_001078275.1_ASM107827v1
GCF_001182765.1_WH8103.1
GCF_001183865.1_ASM118386v1
GCF_001185205.1_ASM118520v1
GCF_001186335.1_ASM118633v1
GCF_001186405.1_ASM118640v1
GCF_001187505.1_ASM118750v1
GCF_001187595.1_ASM118759v1
GCF_001187785.1_ASM118778v1
GCF_001187845.1_ASM118784v1
GCF_001188855.1_ASM118885v1
GCF_001189295.1_ASM118929v1
GCF_001189495.1_ASM118949v1
GCF_001189535.1_ASM118953v1
GCF_001189555.1_ASM118955v1
GCF_001190745.1_ASM119074v1
GCF_001190755.1_ASM119075v1
GCF_001190925.1_ASM119092v1
GCF_001190945.1_ASM119094v1
GCF_001191005.1_ASM119100v1
GCF_001191625.1_ASM119162v1
GCF_001260615.2_S2_rcS3_S1_rcS3
GCF_001262015.1_ASM126201v1
GCF_001262055.1_ASM126205v1
GCF_001262075.1_ASM126207v1
GCF_001263175.1_ASM126317v1
GCF_001263395.1_ASM126339v1
GCF_001264245.1_ASM126424v1
GCF_001266755.1_ASM126675v1
GCF_001266795.1_ASM126679v1
GCF_001267195.1_ASM126719v1
GCF_001267395.1_ASM126739v1
GCF_001267885.1_ASM126788v1
GCF_001267925.1_ASM126792v1
GCF_001271345.1_ASM127134v1
GCF_001272655.1_ASM127265v1
GCF_001273775.1_ASM127377v1
GCF_001274535.1_ASM127453v1
GCF_001274575.1_ASM127457v1
GCF_001274875.1_ASM127487v1
GCF_001274895.1_ASM127489v1
GCF_001275345.1_ASM127534v1
GCF_001277175.1_ASM127717v1
GCF_001277195.1_ASM127719v1
GCF_001277215.2_ASM127721v2
GCF_001277235.1_ASM127723v1
GCF_001277255.1_ASM127725v1
GCF_001277295.1_ASM127729v1
GCF_001277995.1_ASM127799v1
GCF_001278035.1_ASM127803v1
GCF_001278055.1_ASM127805v1
GCF_001278075.1_ASM127807v1
GCF_001278095.1_ASM127809v1
GCF_001278715.1_ASM127871v1
GCF_001278825.1_ASM127882v1
GCF_001278845.1_ASM127884v1
GCF_001280305.1_ASM128030v1
GCF_001281045.1_ASM128104v1
GCF_001281115.1_ASM128111v1
GCF_001281315.1_ASM128131v1
GCF_001281385.1_ASM128138v1
GCF_001281405.1_ASM128140v1
GCF_001281465.1_ASM128146v1
GCF_001281505.1_ASM128150v1
GCF_001281565.1_ASM128156v1
GCF_001293045.1_ASM129304v1
GCF_001293125.1_ASM129312v1
GCF_001293165.1_ASM129316v1
GCF_001298655.2_SD1D
GCF_001302585.1_ASM130258v1
GCF_001304715.1_ASM130471v1
GCF_001305615.1_ASM130561v1
GCF_001307195.1_ASM130719v1
GCF_001307295.1_ASM130729v1
GCF_001307545.1_ASM130754v1
GCF_001310225.1_ASM131022v1
GCF_001310255.1_ASM131025v1
GCF_001314225.1_ASM131422v1
GCF_001314305.1_ASM131430v1
GCF_001314995.1_ASM131499v1
GCF_001402875.1_ASM140287v1
GCF_001402915.1_ASM140291v1
GCF_001406115.1_Streptomyces_venezuelae_ATCC_15439
GCF_001411805.1_ASM141180v1
GCF_001412575.1_ASM141257v1
GCF_001420915.1_ASM142091v1
GCF_001431725.1_ASM143172v1
GCF_001432245.1_ASM143224v1
GCF_001433715.1_ASM143371v1
GCF_001442535.1_ASM144253v1
GCF_001442785.1_ASM144278v1
GCF_001442805.1_ASM144280v1
GCF_001443605.1_ASM144360v1
GCF_001443645.1_ASM144364v1
GCF_001444365.1_ASM144436v1
GCF_001444405.1_ASM144440v1
GCF_001444425.1_ASM144442v1
GCF_001454945.1_ASM145494v1
GCF_001455105.1_ASM145510v1
GCF_001455325.1_ASM145532v1
GCF_001456065.2_ASM145606v2
GCF_001460635.1_htyphlonius_mit97-6810
GCF_001465295.1_ASM146529v1
GCF_001465545.1_ASM146554v1
GCF_001465795.1_ASM146579v1
GCF_001465835.1_ASM146583v1
GCF_001477625.1_ASM147762v1
GCF_001481655.1_ASM148165v1
GCF_001482365.1_ASM148236v1
GCF_001482385.1_ASM148238v1
GCF_001483385.1_ASM148338v1
GCF_001483865.1_ASM148386v1
GCF_001483945.1_ASM148394v1
GCF_001483965.1_ASM148396v1
GCF_001484065.1_ASM148406v1
GCF_001484565.1_ASM148456v1
GCF_001484605.1_ASM148460v1
GCF_001484705.1_ASM148470v1
GCF_001484935.1_ASM148493v1
GCF_001499615.1_Acetobacter_senegalensis_108B
GCF_001499655.1_PNK1
GCF_001511755.1_Shine
GCF_001511815.1_TUE45
GCF_001513745.1_ASM151374v1
GCF_001514355.1_ASM151435v1
GCF_001518795.1_ASM151879v1
GCF_001518815.1_ASM151881v1
GCF_001518835.1_ASM151883v1
GCF_900000005.1_BVF60

## Sheet: QfO_release_2020_04_with_update
Eukaryota	UP000001593_45351
Eukaryota	UP000002485_284812
Eukaryota	UP000007266_7070
Eukaryota	UP000001805_367110
Eukaryota	UP000018468_7918
Eukaryota	UP000006548_3702
Eukaryota	UP000008144_7719
Eukaryota	UP000059680_39947
Eukaryota	UP000002311_559292
Eukaryota	UP000002494_10116
Eukaryota	UP000001554_7739
Eukaryota	UP000001548_184922
Eukaryota	UP000005640_9606
Eukaryota	UP000001940_6239
Eukaryota	UP000009136_9913
Eukaryota	UP000000561_237631
Eukaryota	UP000002277_9598
Eukaryota	UP000000539_9031
Eukaryota	UP000006727_3218
Eukaryota	UP000008143_8364
Eukaryota	UP000001555_6945
Eukaryota	UP000007062_7165
Eukaryota	UP000002195_44689
Eukaryota	UP000001357_81824
Eukaryota	UP000000589_10090
Eukaryota	UP000001038_8090
Eukaryota	UP000001300_284591
Eukaryota	UP000007241_684364
Eukaryota	UP000001450_36329
Eukaryota	UP000007305_4577
Eukaryota	UP000001055_321614
Eukaryota	UP000002149_214684
Eukaryota	UP000006906_3055
Eukaryota	UP000000803_7227
Eukaryota	UP000015101_6412
Eukaryota	UP000000559_237561
Eukaryota	UP000002280_13616
Eukaryota	UP000000437_7955
Eukaryota	UP000000542_5664
Eukaryota	UP000001449_35128
Eukaryota	UP000001312_665079
Eukaryota	UP000001542_5722
Eukaryota	UP000002530_330879
Eukaryota	UP000000600_5888
Eukaryota	UP000005238_164328
Eukaryota	UP000008783_418459
Eukaryota	UP000001519_9595
Eukaryota	UP000002254_9615
Archaea	UP000001686_374847
Archaea	UP000000792_436308
Archaea	UP000002487_188937
Archaea	UP000000805_243232
Archaea	UP000000554_64091
Archaea	UP000000536_69014
Archaea	UP000001974_273057
Bacteria	UP000000425_122586
Bacteria	UP000000577_243231
Bacteria	UP000000557_251221
Bacteria	UP000001025_243090
Bacteria	UP000001570_224308
Bacteria	UP000001973_100226
Bacteria	UP000000431_272561
Bacteria	UP000002008_324602
Bacteria	UP000001425_1111708
Bacteria	UP000002524_243230
Bacteria	UP000002438_208964
Bacteria	UP000000625_83333
Bacteria	UP000002521_190304
Bacteria	UP000001408_189518
Bacteria	UP000001584_83332
Bacteria	UP000008183_243274
Bacteria	UP000000718_289376
Bacteria	UP000007719_515635
Bacteria	UP000000798_224324
Bacteria	UP000002526_224911
Bacteria	UP000001414_226186
Bacteria	UP000000807_243273
Bacteria	UP000000429_85962

[truncated: 1 more sheets: dependencies]
